# Supplementary material for: Genome-Wide Analysis of Hypoxia-Responsive Genes in the Rice Blast Fungus, Magnaporthe oryzae
Source: PLoS One. 2015 Aug 4;10(8):e0134939. doi: 10.1371/journal.pone.0134939 (PMC4524601; doi:10.1371/journal.pone.0134939)
Supplement: S3 Table — (XLSX) [file pone.0134939.s004.xlsx]

## Sheet: Transcripts having reads
isoform_id	gene_id	CDS_id	gene_short_name	TSS_group_id	class_code	nearest_ref_id	locus	length	Hypoxia	Control	Hypoxia_0	Hypoxia_1	Hypoxia_2	Control_0	Control_1	Control_2	Desc	Exon_Len	Trans_Len	GC
TCONS_00001395	XLOC_001321	NA	MGG_02076	TSS1355	=	MGG_02076T0	supercont8.1:496667-498247	1076	0	1.2e-06	0	0	0	0	3.59e-06	0	hypothetical protein (1050 nt)	1076	1050	59.05
TCONS_00000004	XLOC_000004	NA	MGG_01950	TSS4	=	MGG_01950T0	supercont8.1:46679-48726	1560	0.0179926	0.128527	0.0539778	0	0	0.217862	0.0335802	0.134139	hypothetical protein (1560 nt)	1560	1560	57.95
TCONS_00000006	XLOC_000006	NA	MGG_01963	TSS6	=	MGG_01963T0	supercont8.1:59811-60835	1024	0.315777	0.220632	0.280393	0.572231	0.0947054	0.220069	0.165825	0.276002	hypothetical protein (603 nt)	1024	603	65.01
TCONS_00000007	XLOC_000007	NA	MGG_15986	TSS7	=	MGG_15986T0	supercont8.1:73368-74528	981	29.9799	18.949	45.8702	13.2051	30.8644	20.5807	21.3785	14.8879	hypothetical protein (621 nt)	981	621	52.5
TCONS_00000008	XLOC_000007	NA	MGG_15986	TSS7	=	MGG_15986T1	supercont8.1:73368-74528	958	70.4731	45.5269	101.079	67.2236	43.1164	75.6938	31.8444	29.0425	hypothetical protein, variant (621 nt)	958	621	52.5
TCONS_00000009	XLOC_000008	NA	MGG_14472	TSS8	=	MGG_14472T0	supercont8.1:85946-89134	1595	7.70332	8.40779	7.58325	7.2842	8.24252	9.45326	7.59593	8.17419	S-methyl-5-thioribose-1-phosphate isomerase (1182 nt)	1595	1182	52.96
TCONS_00000010	XLOC_000009	NA	MGG_14620	TSS9	=	MGG_14620T0	supercont8.1:89223-93266	3777	40.0679	14.3625	43.173	38.6837	38.347	14.9849	13.8115	14.2912	CAMK/CAMKL protein kinase (2793 nt)	3777	2793	55.96
TCONS_00000011	XLOC_000010	NA	MGG_01972	TSS10	=	MGG_01972T0	supercont8.1:95221-100637	1414	34.5655	43.5673	35.256	34.5665	33.8739	45.258	42.2999	43.1439	hypothetical protein (594 nt)	1414	594	58.59
TCONS_00000012	XLOC_000011	NA	MGG_01974	TSS11	=	MGG_01974T0	supercont8.1:100816-102346	1394	7.64941	3.93206	8.49379	7.18688	7.26757	5.53097	3.32573	2.93949	hypothetical protein (393 nt)	1394	393	52.67
TCONS_00000013	XLOC_000012	NA	MGG_01975	TSS12	=	MGG_01975T0	supercont8.1:103078-105652	2421	0.0855214	0.0192183	0.115514	0	0.14105	0.0164919	0.0205954	0.0205675	hypothetical protein (2421 nt)	2421	2421	53.9
TCONS_00000014	XLOC_000013	NA	MGG_01979	TSS13	=	MGG_01979T0	supercont8.1:118853-121097	1967	72.6222	68.8968	84.8039	68.1653	64.8974	78.2805	64.1839	64.2261	T-complex protein 1 subunit beta (1593 nt)	1967	1593	54.61
TCONS_00000015	XLOC_000014	NA	MGG_01980	TSS14	=	MGG_01980T0	supercont8.1:122579-123650	1071	0.260875	0.536017	0.513128	0.0902533	0.179245	0.5626	0.470803	0.57465	hypothetical protein (1071 nt)	1071	1071	52.66
TCONS_00000016	XLOC_000015	NA	MGG_01981	TSS15	=	MGG_01981T0	supercont8.1:124110-125208	784	34.8676	25.7311	31.959	36.5159	36.1278	21.9324	28.776	26.485	hypothetical protein (375 nt)	784	375	50.13
TCONS_00000017	XLOC_000016	NA	MGG_01982	TSS16	=	MGG_01982T0	supercont8.1:125890-129839	3678	16.7099	17.6116	19.0085	16.0223	15.0988	19.5915	17.0474	16.196	hypothetical protein (3078 nt)	3678	3078	55.36
TCONS_00000018	XLOC_000017	NA	MGG_01983	TSS17	=	MGG_01983T0	supercont8.1:130447-132572	2057	0.872448	0.363545	1.05129	0.891538	0.674513	0.352665	0.270822	0.467149	hypothetical protein (1500 nt)	2057	1500	54.6
TCONS_00000019	XLOC_000018	NA	MGG_01984	TSS18	=	MGG_01984T0	supercont8.1:133190-134723	1455	0.824164	1.04612	0.783724	0.94113	0.747638	0.775387	1.23682	1.12617	hypothetical protein (1455 nt)	1455	1455	54.23
TCONS_00000020	XLOC_000019	NA	MGG_01985	TSS19	=	MGG_01985T0	supercont8.1:137257-139761	2406	245.532	234.775	282.233	224.452	229.91	263.568	219.688	221.067	Delta(12) fatty acid desaturase (1464 nt)	2406	1464	57.86
TCONS_00000021	XLOC_000020	NA	MGG_13669	TSS20	=	MGG_13669T0	supercont8.1:145030-147733	2703	137.315	716.465	144.196	134.046	133.702	746.055	704.686	698.654	peptide transporter PTR2 (1875 nt)	2703	1875	58.19
TCONS_00000022	XLOC_000021	NA	MGG_01989	TSS21	=	MGG_01989T0	supercont8.1:158543-161785	1665	0.507422	0.192505	0.50426	0.483996	0.53401	0.265857	0.187096	0.124562	hypothetical protein (1665 nt)	1665	1665	57.36
TCONS_00000023	XLOC_000022	NA	MGG_01991	TSS22	=	MGG_01991T0	supercont8.1:162586-164737	1996	29.2679	47.238	31.4242	28.3106	28.0688	52.8388	44.5695	44.3058	betaine aldehyde dehydrogenase (1599 nt)	1996	1599	56.97
TCONS_00000025	XLOC_000024	NA	MGG_01995	TSS24	=	MGG_01995T0	supercont8.1:170266-172070	1715	339.186	259.812	341.413	335.036	341.109	253.667	263.213	262.556	isocitrate dehydrogenase subunit 1 (1161 nt)	1715	1161	59.43
TCONS_00000026	XLOC_000025	NA	MGG_01996	TSS25	=	MGG_01996T0	supercont8.1:172285-178412	4709	0	0.374951	0	0	0	0.63954	0.128259	0.357053	hypothetical protein (3045 nt)	4709	3045	57.24
TCONS_00000027	XLOC_000025	NA	MGG_01996	TSS25	=	MGG_01996T1	supercont8.1:172285-178412	4656	7.74203	23.8584	7.91917	7.47731	7.82961	23.6473	23.5312	24.3966	hypothetical protein, variant (3045 nt)	4656	3045	57.24
TCONS_00000028	XLOC_000026	NA	MGG_15988	TSS26	=	MGG_15988T0	supercont8.1:182601-190885	4463	90.4184	51.5985	91.0589	92.4601	87.7362	52.8028	50.4252	51.5677	IRE protein kinase (3861 nt)	4463	3861	54.73
TCONS_00000031	XLOC_000027	NA	MGG_02001	TSS28	=	MGG_02001T0	supercont8.1:191709-193646	1834	35.017	12.3091	41.5632	31.4469	32.041	14.2605	11.1595	11.5075	hypothetical protein (1200 nt)	1834	1200	62.75
TCONS_00000032	XLOC_000028	NA	MGG_15990	TSS29	=	MGG_15990T0	supercont8.1:194250-199697	1753	27.6621	8.62062	32.5291	26.5185	23.9389	11.7763	5.40536	8.68021	hypothetical protein (1428 nt)	1753	1428	64.71
TCONS_00000034	XLOC_000028	NA	MGG_15991	TSS30	=	MGG_15991T0	supercont8.1:194250-199697	3364	81.7749	79.2634	78.6403	85.7932	80.8913	77.122	77.7106	82.9575	hypothetical protein (2757 nt)	3364	2757	50.63
TCONS_00000035	XLOC_000029	NA	MGG_02004	TSS31	=	MGG_02004T0	supercont8.1:201073-201655	582	4834.16	647.775	4197.89	5098.61	5205.99	568.767	688.858	685.7	hypothetical protein (582 nt)	582	582	45.36
TCONS_00000036	XLOC_000030	NA	MGG_15992	TSS32	=	MGG_15992T0	supercont8.1:201952-202678	726	348.465	113.939	375.325	341.624	328.446	124.762	110.582	106.472	hypothetical protein (726 nt)	726	726	50.41
TCONS_00000037	XLOC_000031	NA	MGG_02006	TSS33	=	MGG_02006T0	supercont8.1:203223-205777	2349	9.06806	13.6834	10.0879	8.80761	8.30865	16.0809	11.9401	13.0292	hypothetical protein (1080 nt)	2349	1080	53.89
TCONS_00000039	XLOC_000033	NA	MGG_15995	TSS35	=	MGG_15995T0	supercont8.1:214550-219811	1557	59.1061	24.1779	69.6334	52.3542	55.3309	26.2571	23.0867	23.1899	hypothetical protein (1269 nt)	1557	1269	47.75
TCONS_00000040	XLOC_000033	NA	MGG_15996	TSS36	=	MGG_15996T0	supercont8.1:214550-219811	647	765.039	275.749	759.169	779.812	756.135	278.195	276.48	272.571	hypothetical protein (333 nt)	647	333	45.95
TCONS_00000059	XLOC_000052	NA	MGG_14610	TSS55	=	MGG_14610T0	supercont8.1:342882-344399	1260	88.6186	39.6321	98.3982	81.5075	85.9501	45.8318	36.4925	36.5722	hypothetical protein (1260 nt)	1260	1260	52.54
TCONS_00000060	XLOC_000053	NA	MGG_02041	TSS56	=	MGG_02041T0	supercont8.1:344796-345981	1094	0.511912	0.753108	0.57143	0.527662	0.436645	0.832876	0.815584	0.610864	hypothetical protein (621 nt)	1094	621	49.76
TCONS_00000061	XLOC_000054	NA	MGG_02043	TSS57	=	MGG_02043T0	supercont8.1:351964-353190	1065	1.68665	1.67823	1.89008	1.63577	1.5341	1.14065	1.15878	2.73525	hypothetical protein (921 nt)	1065	921	47.45
TCONS_00000062	XLOC_000055	NA	MGG_16013	TSS58	=	MGG_16013T0	supercont8.1:357083-357554	471	0	0.764598	0	0	0	0.637234	0.828824	0.827737	hypothetical protein (471 nt)	471	471	42.89
TCONS_00000063	XLOC_000056	NA	MGG_02045	TSS59	=	MGG_02045T0	supercont8.1:358468-362320	3752	12.2113	23.8022	12.1631	12.4667	12.0042	22.458	23.8984	25.0502	hypothetical protein (3315 nt)	3752	3315	48.6
TCONS_00000064	XLOC_000057	NA	MGG_13692	TSS60	=	MGG_13692T0	supercont8.1:368871-369201	261	0	0.227215	0	0	0	0	0.681644	0	hypothetical protein (261 nt)	261	261	54.79
TCONS_00000065	XLOC_000058	NA	MGG_02047	TSS61	=	MGG_02047T0	supercont8.1:376031-378592	2436	5.08735	16.3462	4.78686	5.3263	5.1489	15.8591	16.2024	16.9772	hypothetical protein (1737 nt)	2436	1737	50.2
TCONS_00000066	XLOC_000059	NA	MGG_16015	TSS62	=	MGG_16015T0	supercont8.1:383219-384221	1002	0.300052	0.525107	0.217085	0.293918	0.389152	0.440551	0.511025	0.623745	hypothetical protein (225 nt)	1002	225	49.78
TCONS_00000067	XLOC_000060	NA	MGG_02051	TSS63	=	MGG_02051T0	supercont8.1:392966-395203	2237	12.4206	26.7279	12.0709	12.7748	12.4163	25.1504	26.9857	28.0476	CAMK protein kinase (1935 nt)	2237	1935	54.63
TCONS_00000068	XLOC_000061	NA	MGG_16017	TSS64	=	MGG_16017T0	supercont8.1:398261-398566	255	253.387	242.652	243.378	251.392	265.39	257.947	231.424	238.585	hypothetical protein (255 nt)	255	255	46.27
TCONS_00000069	XLOC_000062	NA	MGG_16018	TSS65	=	MGG_16018T0	supercont8.1:402665-403459	485	0.543234	0.314707	0.540447	0.818363	0.270893	0.155428	0.631121	0.157573	hypothetical protein (384 nt)	485	384	53.12
TCONS_00000070	XLOC_000063	NA	MGG_02056	TSS66	=	MGG_02056T0	supercont8.1:414776-417691	2791	13.0907	23.4838	12.5062	13.9458	12.8201	23.2765	23.5064	23.6685	hypothetical protein (1407 nt)	2791	1407	51.6
TCONS_00000071	XLOC_000064	NA	MGG_16023	TSS67	=	MGG_16023T0	supercont8.1:418621-418859	171	0	2.90305	0	0	0	0	8.70914	0	hypothetical protein (171 nt)	171	171	45.61
TCONS_00000072	XLOC_000065	NA	MGG_02058	TSS68	=	MGG_02058T0	supercont8.1:423458-425367	1746	0.892459	10.4343	1.05209	0.815494	0.809787	9.59477	10.8762	10.8319	mitochondrial chaperone BCS1 (1701 nt)	1746	1701	53.03
TCONS_00000073	XLOC_000066	NA	MGG_02060	TSS69	=	MGG_02060T0	supercont8.1:436988-438567	1338	0.750694	0.530062	1.14833	0.691658	0.412093	0.588264	0.601479	0.400444	aromatic amino acid aminotransferase (1143 nt)	1338	1143	57.13
TCONS_00000074	XLOC_000067	NA	MGG_02062	TSS70	=	MGG_02062T0	supercont8.1:441827-443033	1206	234.133	174.714	184.859	254.067	263.473	139.678	194.151	190.313	hypothetical protein (1206 nt)	1206	1206	55.89
TCONS_00000075	XLOC_000068	NA	MGG_02063	TSS71	=	MGG_02063T0	supercont8.1:444782-445572	790	0.841968	0.863655	0.805681	0.664477	1.05574	0.744247	1.07785	0.768864	hypothetical protein (507 nt)	790	507	51.48
TCONS_00000076	XLOC_000069	NA	MGG_02064	TSS72	=	MGG_02064T0	supercont8.1:447083-449238	2094	51.1072	76.4717	48.993	52.8246	51.5041	74.4654	77.1776	77.7721	hypothetical protein (1209 nt)	2094	1209	50.95
TCONS_00000077	XLOC_000070	NA	MGG_02067	TSS73	=	MGG_02067T0	supercont8.1:461168-462816	857	0	0.0230374	0	0	0	0	0	0.0691123	hypothetical protein (813 nt)	857	813	46.49
TCONS_00000078	XLOC_000071	NA	MGG_16027	TSS74	=	MGG_16027T0	supercont8.1:464650-466024	1242	0.747365	0.596834	0.661151	0.906111	0.674832	0.565685	0.612822	0.611995	hypothetical protein (1242 nt)	1242	1242	60.63
TCONS_00000079	XLOC_000072	NA	MGG_16028	TSS75	=	MGG_16028T0	supercont8.1:471933-472230	225	0.797919	0	0	2.39376	0	0	0	0	hypothetical protein (225 nt)	225	225	53.78
TCONS_00000080	XLOC_000073	NA	MGG_02069	TSS76	=	MGG_02069T0	supercont8.1:472721-477722	980	253.572	76.7305	234.392	263.683	262.641	71.8212	80.026	78.3444	glyoxalase/bleomycin resistance protein/dioxygenase (396 nt)	980	396	63.38
TCONS_00000081	XLOC_000074	NA	MGG_02071	TSS77	=	MGG_02071T0	supercont8.1:472721-477722	2217	3.32336	3.03253	4.41649	2.16389	3.38971	2.9866	3.47638	2.63459	cryptochrome-1 (2040 nt)	2217	2040	54.71
TCONS_00000082	XLOC_000074	NA	MGG_02071	TSS78	=	MGG_02071T1	supercont8.1:472721-477722	2033	1.42076	1.67309	1.11036	2.86651	0.285416	2.64372	1.16404	1.21153	cryptochrome-1, variant (1587 nt)	2033	1587	55.01
TCONS_00000083	XLOC_000075	NA	MGG_02072	TSS79	=	MGG_02072T0	supercont8.1:480115-484056	3396	193.173	458.574	237.267	173.524	168.729	576.958	400.241	398.524	amino-acid permease inda1 (1734 nt)	3396	1734	57.15
TCONS_00000085	XLOC_000077	NA	MGG_16030	TSS81	=	MGG_16030T0	supercont8.1:492449-496458	481	0.0922021	1.75465	0	0.276606	0	1.74666	1.7598	1.75749	hypothetical protein (183 nt)	481	183	62.3
TCONS_00000086	XLOC_000078	NA	MGG_14606	TSS82	=	MGG_14606T0	supercont8.1:500326-501454	1059	0.12172	0.409	0.0926	0	0.272603	0.327133	0.530374	0.370762	hypothetical protein (1059 nt)	1059	1059	56.37
TCONS_00000087	XLOC_000079	NA	MGG_14605	TSS83	=	MGG_14605T0	supercont8.1:502000-502455	360	0.64828	0.947465	0.512164	0.479765	0.952911	1.18243	0.830516	0.829453	hypothetical protein (360 nt)	360	360	58.06
TCONS_00000089	XLOC_000081	NA	MGG_02081	TSS85	=	MGG_02081T0	supercont8.1:506856-510148	1904	0.159319	0.447482	0.0639234	0.0925111	0.321523	0.48482	0.321882	0.535743	hypothetical protein (1686 nt)	1904	1686	58.6
TCONS_00000090	XLOC_000082	NA	MGG_02084	TSS86	=	MGG_02084T0	supercont8.1:513638-515018	1380	113.737	112.812	113.45	114.147	113.614	113.444	112.399	112.595	hypothetical protein (945 nt)	1380	945	66.88
TCONS_00000091	XLOC_000083	NA	MGG_02085	TSS87	=	MGG_02085T0	supercont8.1:515207-516679	1348	123.705	49.1268	123.926	122.116	125.075	50.3335	49.0528	47.9941	FAD-linked sulfhydryl oxidase ALR (654 nt)	1348	654	58.56
TCONS_00000092	XLOC_000084	NA	MGG_02086	TSS88	=	MGG_02086T0	supercont8.1:516793-518415	1165	368.995	357.951	380.526	368.239	358.219	360.558	351.931	361.365	proteasome component PRE3 (687 nt)	1165	687	57.64
TCONS_00000093	XLOC_000085	NA	MGG_16032	TSS89	=	MGG_16032T0	supercont8.1:519050-519975	222	3.43645	0.9223	2.59087	2.58446	5.13403	0	2.7669	0	hypothetical protein (222 nt)	222	222	54.95
TCONS_00000094	XLOC_000086	NA	MGG_02088	TSS90	=	MGG_02088T0	supercont8.1:520337-527617	6450	45.1301	42.1035	43.6551	47.7665	43.9685	40.321	42.5478	43.4416	hypothetical protein (1842 nt)	6450	1842	56.19
TCONS_00000095	XLOC_000087	NA	MGG_02090	TSS91	=	MGG_02090T0	supercont8.1:529937-530565	462	0	0.183216	0	0	0	0.378533	0	0.171114	hypothetical protein (336 nt)	462	336	56.85
TCONS_00000096	XLOC_000088	NA	MGG_02094	TSS92	=	MGG_02094T0	supercont8.1:544744-546432	1629	0	0.0308663	0	0	0	0.0286685	0.0639303	0	cytochrome P450 3A19 (1629 nt)	1629	1629	57.58
TCONS_00000097	XLOC_000089	NA	MGG_02095	TSS93	=	MGG_02095T0	supercont8.1:549745-551004	996	135.167	16.6796	137.76	134.241	133.499	17.0537	16.3036	16.6815	hypothetical protein (996 nt)	996	996	63.05
TCONS_00000098	XLOC_000090	NA	MGG_02096	TSS94	=	MGG_02096T0	supercont8.1:551130-554596	3394	6.2958	3.99887	6.38005	6.12792	6.37944	4.27666	3.88409	3.83587	glycoside hydrolase (2493 nt)	3394	2493	61.81
TCONS_00000099	XLOC_000091	NA	MGG_02097	TSS95	=	MGG_02097T0	supercont8.1:557647-560290	2643	1.72883	2.85495	2.29053	1.45307	1.4429	3.39928	2.6594	2.50617	hypothetical protein (2415 nt)	2643	2415	61.74
TCONS_00000100	XLOC_000092	NA	MGG_02098	TSS96	=	MGG_02098T0	supercont8.1:561096-563246	2150	41.3223	33.9931	40.1135	42.6178	41.2354	33.6242	33.8609	34.4941	3-ketosteroid-delta-1-dehydrogenase (1719 nt)	2150	1719	65.97
TCONS_00000101	XLOC_000093	NA	MGG_02099	TSS97	=	MGG_02099T0	supercont8.1:564155-567691	3460	51.603	21.0574	44.7245	55.4889	54.5955	17.9013	22.4123	22.8586	C2 domain-containing protein (2112 nt)	3460	2112	57.01
TCONS_00000102	XLOC_000094	NA	MGG_02101	TSS98	=	MGG_02101T0	supercont8.1:569237-570870	1229	3.10207	30.1251	3.81934	2.90543	2.58142	34.8782	26.2835	29.2137	hypothetical protein (855 nt)	1229	855	62.92
TCONS_00000103	XLOC_000095	NA	MGG_02103	TSS99	=	MGG_02103T0	supercont8.1:573316-574409	938	47.7485	187.595	45.5683	50.6533	47.0237	181.812	192.402	188.571	maltose O-acetyltransferase (660 nt)	938	660	54.55
TCONS_00000104	XLOC_000096	NA	MGG_02106	TSS100	=	MGG_02106T0	supercont8.1:580254-580862	531	4.17128	2.10427	4.77629	3.29579	4.44175	1.41137	2.99686	1.90458	hypothetical protein (531 nt)	531	531	55.93
TCONS_00000105	XLOC_000097	NA	MGG_16033	TSS101	=	MGG_16033T0	supercont8.1:582148-585372	1805	0.475424	1.16579	0.644119	0.294594	0.487558	1.079	1.19582	1.22254	hypothetical protein (1509 nt)	1805	1509	67.2
TCONS_00000107	XLOC_000097	NA	MGG_16034	TSS102	=	MGG_16034T0	supercont8.1:582148-585372	1357	15.1058	14.4577	11.0766	17.689	16.5519	10.0271	16.4479	16.8982	hypothetical protein (603 nt)	1357	603	58.37
TCONS_00000108	XLOC_000098	NA	MGG_02110	TSS103	=	MGG_02110T0	supercont8.1:586465-588497	1109	0.510585	0.162292	0.670382	0.346	0.515372	0.0860407	0.200552	0.200282	caleosin domain-containing protein (798 nt)	1109	798	59.9
TCONS_00000109	XLOC_000099	NA	MGG_02115	TSS104	=	MGG_02115T0	supercont8.1:599091-600303	1212	0	0.0300423	0	0	0	0	0.0901268	0	oxidoreductase (1212 nt)	1212	1212	69.39
TCONS_00000110	XLOC_000100	NA	MGG_16035	TSS105	=	MGG_16035T0	supercont8.1:600519-604933	994	0.172182	0.250298	0.221067	0.0989539	0.196525	0.0630979	0.40144	0.286357	hypothetical protein (420 nt)	994	420	55.48
TCONS_00000111	XLOC_000101	NA	MGG_02117	TSS106	=	MGG_02117T0	supercont8.1:608128-610354	2134	66.973	46.731	53.3423	71.8741	75.7027	38.9037	51.6832	49.6062	hypothetical protein (462 nt)	2134	462	56.06
TCONS_00000112	XLOC_000102	NA	MGG_02118	TSS107	=	MGG_02118T0	supercont8.1:613677-614955	1278	0	0.0285384	0	0	0	0.0432965	0.0423188	0	hypothetical protein (1278 nt)	1278	1278	65.02
TCONS_00000113	XLOC_000103	NA	MGG_02119	TSS108	=	MGG_02119T0	supercont8.1:621766-623611	1510	4.26747	115.41	4.83455	4.02786	3.93999	132.289	106.103	107.839	high-affinity nicotinic acid transporter (1494 nt)	1510	1494	61.24
TCONS_00000114	XLOC_000104	NA	MGG_02120	TSS109	=	MGG_02120T0	supercont8.1:624600-626594	1803	0.0163871	0.0379844	0	0.0491613	0	0	0.0570152	0.056938	sterigmatocystin 8-O-methyltransferase (1407 nt)	1803	1407	64.61
TCONS_00000115	XLOC_000105	NA	MGG_02123	TSS110	=	MGG_02123T0	supercont8.1:631411-634316	2716	5.30535	22.5092	5.66794	5.07957	5.16855	23.5832	22.3506	21.5938	hypothetical protein (2241 nt)	2716	2241	55.64
TCONS_00000116	XLOC_000106	NA	MGG_14602	TSS111	=	MGG_14602T0	supercont8.1:643269-644736	1467	89.8683	55.1492	81.1021	91.7334	96.7695	49.9284	57.6906	57.8285	endo-1,6-beta-D-glucanase (1467 nt)	1467	1467	55.08
TCONS_00000117	XLOC_000107	NA	MGG_14601	TSS112	=	MGG_14601T0	supercont8.1:645379-646693	1314	1.1246	1.79488	1.54285	0.989095	0.841867	1.74181	1.84312	1.79972	hypothetical protein (1314 nt)	1314	1314	52.05
TCONS_00000119	XLOC_000108	NA	MGG_13713	TSS113	=	MGG_13713T0	supercont8.1:647002-647851	849	3.09022	3.70753	3.72943	2.65984	2.88138	4.4025	3.15229	3.5678	hypothetical protein (849 nt)	849	849	58.89
TCONS_00000120	XLOC_000109	NA	MGG_16036	TSS114	=	MGG_16036T0	supercont8.1:647894-650859	334	0	0.56717	0	0	0	0.388868	0.656737	0.655906	hypothetical protein (216 nt)	334	216	55.56
TCONS_00000122	XLOC_000110	NA	MGG_13715	TSS115	=	MGG_13715T0	supercont8.1:654810-656594	1502	1.11614	3.78131	0.81481	1.57262	0.960996	4.40441	3.78752	3.152	beta-lactamase (1239 nt)	1502	1239	66.51
TCONS_00000123	XLOC_000111	NA	MGG_02129	TSS116	=	MGG_02129T0	supercont8.1:657489-660150	2661	0.534896	0.973012	0.549798	0.641096	0.413794	1.04258	0.929576	0.94688	hypothetical protein (2661 nt)	2661	2661	64.94
TCONS_00000124	XLOC_000112	NA	MGG_13716	TSS117	=	MGG_13716T0	supercont8.1:661764-662093	237	83.9105	45.051	86.2885	74.8141	90.629	44.4147	49.4297	41.3087	hypothetical protein (237 nt)	237	237	52.74
TCONS_00000126	XLOC_000114	NA	MGG_02132	TSS119	=	MGG_02132T0	supercont8.1:671870-675074	3140	18.1235	32.4059	17.4827	19.0837	17.804	31.283	33.7676	32.1671	hypothetical protein (2658 nt)	3140	2658	54.51
TCONS_00000127	XLOC_000115	NA	MGG_16038	TSS120	=	MGG_16038T0	supercont8.1:675635-680457	2396	5.82174	8.68447	5.87113	5.60268	5.99141	8.58905	9.08156	8.38281	hypothetical protein (1764 nt)	2396	1764	65.48
TCONS_00000128	XLOC_000116	NA	MGG_16039	TSS121	=	MGG_16039T0	supercont8.1:683271-684295	845	31.4053	38.6929	45.1234	24.3292	24.7633	53.4605	32.9149	29.7033	hypothetical protein (600 nt)	845	600	53.5
TCONS_00000130	XLOC_000118	NA	MGG_02139	TSS123	=	MGG_02139T0	supercont8.1:699738-700225	381	0	0.0875186	0	0	0	0.262556	0	0	hypothetical protein (381 nt)	381	381	57.48
TCONS_00000131	XLOC_000119	NA	MGG_13719	TSS124	=	MGG_13719T0	supercont8.1:702443-703810	1092	2.48532	1.86092	1.39649	2.90861	3.15086	1.24361	1.89024	2.4489	hypothetical protein (1092 nt)	1092	1092	63.55
TCONS_00000133	XLOC_000120	NA	MGG_02142	TSS126	=	MGG_02142T0	supercont8.1:705396-709659	4086	0.0730398	0.2956	0.0169695	0.0609438	0.141206	0.239181	0.282813	0.364804	hypothetical protein (4086 nt)	4086	4086	59.3
TCONS_00000136	XLOC_000123	NA	MGG_14598	TSS129	=	MGG_14598T0	supercont8.1:732477-735082	2160	0	0.317107	0	0	0	0.27538	0.209971	0.465969	hypothetical protein (2160 nt)	2160	2160	60.46
TCONS_00000137	XLOC_000124	NA	MGG_14597	TSS130	=	MGG_14597T0	supercont8.1:735166-737713	2307	0.0124761	1.37676	0	0.0374282	0	1.18033	1.34582	1.60412	hypothetical protein (2307 nt)	2307	2307	65.89
TCONS_00000138	XLOC_000125	NA	MGG_02155	TSS131	=	MGG_02155T0	supercont8.1:750096-750927	831	0.187432	0.630124	0.314515	0.124325	0.123457	0.306744	0.792345	0.791283	hypothetical protein (831 nt)	831	831	61.01
TCONS_00000139	XLOC_000126	NA	MGG_02158	TSS132	=	MGG_02158T0	supercont8.1:756485-757969	1119	103.076	11.3501	142.2	83.1678	83.861	15.5132	9.77038	8.76663	plasma membrane iron permease (1119 nt)	1119	1119	59.16
TCONS_00000140	XLOC_000127	NA	MGG_02159	TSS133	=	MGG_02159T0	supercont8.1:760029-761510	1377	10.6162	4.04839	12.1213	9.76495	9.96232	4.89934	3.29598	3.94984	glycosyltransferase (1377 nt)	1377	1377	62.75
TCONS_00000143	XLOC_000130	NA	MGG_02165	TSS136	=	MGG_02165T0	supercont8.1:774896-775581	237	49.7956	53.4335	49.3426	52.9173	47.1271	46.3778	58.5086	55.4142	hypothetical protein (237 nt)	237	237	57.38
TCONS_00000146	XLOC_000133	NA	MGG_02168	TSS139	=	MGG_02168T0	supercont8.1:781901-786889	1212	14.2754	34.6962	15.1746	13.3708	14.2809	36.8544	33.5723	33.6619	hypothetical protein (1101 nt)	1212	1101	60.31
TCONS_00000147	XLOC_000134	NA	MGG_16049	TSS140	=	MGG_16049T0	supercont8.1:826853-828198	813	0.0423515	0.222216	0	0	0.127054	0	0.296509	0.370139	hypothetical protein (813 nt)	813	813	50.92
TCONS_00000150	XLOC_000137	NA	MGG_16053	TSS143	=	MGG_16053T0	supercont8.1:877825-881812	805	301.643	241.805	291.826	306.817	306.287	231.246	248.553	245.615	hypothetical protein (516 nt)	805	516	57.56
TCONS_00000152	XLOC_000137	NA	MGG_16054	TSS144	=	MGG_16054T0	supercont8.1:877825-881812	2755	0.00118689	0	0	0.00356067	0	0	0	0	hypothetical protein (1824 nt)	2755	1824	53.12
TCONS_00000153	XLOC_000138	NA	MGG_02186	TSS145	=	MGG_02186T0	supercont8.1:883548-885413	1601	2.46803	5.50317	2.80931	2.36148	2.23329	6.1825	4.6946	5.63241	hypothetical protein (1089 nt)	1601	1089	64.37
TCONS_00000154	XLOC_000139	NA	MGG_13736	TSS146	=	MGG_13736T0	supercont8.1:886607-887803	816	1.1528	0.80299	0.792482	1.52795	1.13796	1.22955	0.516386	0.663035	hypothetical protein (786 nt)	816	786	57.76
TCONS_00000155	XLOC_000140	NA	MGG_02187	TSS147	=	MGG_02187T0	supercont8.1:888979-891839	2720	4.2943	3.43988	4.08627	4.32019	4.47646	3.06118	4.01274	3.24573	hypothetical protein (2409 nt)	2720	2409	67.87
TCONS_00000156	XLOC_000141	NA	MGG_02192	TSS148	=	MGG_02192T0	supercont8.1:908133-910773	2640	0.0214025	0.0375783	0	0	0.0642075	0.0565068	0.0375023	0.0187257	alpha-L-rhamnosidase A (2640 nt)	2640	2640	62.88
TCONS_00000157	XLOC_000142	NA	MGG_16057	TSS149	=	MGG_16057T0	supercont8.1:921581-922280	630	0	0.0701301	0	0	0	0	0.105265	0.105125	hypothetical protein (630 nt)	630	630	52.7
TCONS_00000158	XLOC_000143	NA	MGG_02199	TSS150	=	MGG_02199T0	supercont8.1:922874-924448	1073	40.6969	20.5228	41.9512	41.3319	38.8076	22.3983	19.7809	19.3894	hypothetical protein (357 nt)	1073	357	62.46
TCONS_00000159	XLOC_000144	NA	MGG_02204	TSS151	=	MGG_02204T0	supercont8.1:930774-933056	2073	0.772722	1.9517	0.682748	0.757664	0.877755	2.04958	1.95284	1.85268	vitamin H transporter (1464 nt)	2073	1464	55.87
TCONS_00000160	XLOC_000145	NA	MGG_13742	TSS152	=	MGG_13742T0	supercont8.1:935409-936255	846	0.583814	0.274042	0.42048	0.607295	0.723667	0.118582	0.562987	0.140558	hypothetical protein (846 nt)	846	846	56.5
TCONS_00000161	XLOC_000146	NA	MGG_02206	TSS153	=	MGG_02206T0	supercont8.1:940139-941166	816	5.08245	7.39489	4.20615	5.85714	5.18406	7.44116	7.0081	7.73541	hypothetical protein (462 nt)	816	462	50.87
TCONS_00000163	XLOC_000148	NA	MGG_16059	TSS155	=	MGG_16059T0	supercont8.1:947384-947936	552	0	0.0427409	0	0	0	0	0.128223	0	hypothetical protein (552 nt)	552	552	50.36
TCONS_00000164	XLOC_000149	NA	MGG_16060	TSS156	=	MGG_16060T0	supercont8.1:951494-953151	1134	0.121827	0.138295	0.197676	0.0841964	0.0836078	0.171063	0.0976082	0.146215	hypothetical protein (315 nt)	1134	315	59.37
TCONS_00000167	XLOC_000152	NA	MGG_16063	TSS159	=	MGG_16063T0	supercont8.1:965890-967788	1849	0.127467	0.129628	0.0485116	0.238969	0.0949188	0.0842051	0.166291	0.138388	hypothetical protein (1683 nt)	1849	1683	53.59
TCONS_00000171	XLOC_000156	NA	MGG_02223	TSS163	=	MGG_02223T0	supercont8.1:1007305-1008030	538	0.809676	2.16375	1.05021	0.691816	0.687004	3.02447	1.33446	2.13232	hypothetical protein (357 nt)	538	357	60.5
TCONS_00000173	XLOC_000158	NA	MGG_14367	TSS165	=	MGG_14367T0	supercont8.1:1033870-1035863	1631	0.0367005	0.0996963	0	0.110102	0	0.107608	0.159603	0.0318774	MFS transporter (1581 nt)	1631	1581	57.69
TCONS_00000174	XLOC_000159	NA	MGG_16069	TSS166	=	MGG_16069T0	supercont8.1:1036013-1037705	1498	0.212187	0.0117099	0.152465	0.303355	0.18074	0	0	0.0351296	hypothetical protein (1386 nt)	1498	1386	60.03
TCONS_00000175	XLOC_000160	NA	MGG_16070	TSS167	=	MGG_16070T0	supercont8.1:1046394-1047510	1035	0	0.0363432	0	0	0	0	0.0545516	0.0544781	hypothetical protein (978 nt)	1035	978	58.69
TCONS_00000181	XLOC_000166	NA	MGG_14596	TSS173	=	MGG_14596T0	supercont8.1:1094392-1096696	2304	0.482487	0.728658	0.401129	0.599704	0.446629	0.839126	0.695604	0.651244	hypothetical protein (2304 nt)	2304	2304	62.72
TCONS_00000182	XLOC_000167	NA	MGG_14595	TSS174	=	MGG_14595T0	supercont8.1:1097377-1098400	969	2.84717	3.32642	3.45038	2.75808	2.33306	4.47747	2.72317	2.77863	hypothetical protein (933 nt)	969	933	55.41
TCONS_00000185	XLOC_000170	NA	MGG_02240	TSS177	=	MGG_02240T0	supercont8.1:1106968-1111959	4064	10.0445	16.0393	8.08459	11.1548	10.8941	12.5066	17.8237	17.7877	hypothetical protein (3444 nt)	4064	3444	60.69
TCONS_00000186	XLOC_000171	NA	MGG_02242	TSS178	=	MGG_02242T0	supercont8.1:1112636-1115324	2292	7.92465	8.22413	7.43106	8.55699	7.78588	7.93649	9.09458	7.64131	hypothetical protein (2292 nt)	2292	2292	51.92
TCONS_00000189	XLOC_000172	NA	MGG_02244	TSS180	=	MGG_02244T1	supercont8.1:1115381-1120605	1351	19.0128	17.924	16.1713	21.1176	19.7494	17.7072	17.8658	18.199	glutathione S-transferase Gst3, variant (1056 nt)	1351	1056	59.19
TCONS_00000191	XLOC_000174	NA	MGG_16076	TSS182	=	MGG_16076T0	supercont8.1:1140760-1141469	600	0.129734	0.369367	0	0.195281	0.193921	0.317049	0.565251	0.2258	hypothetical protein (600 nt)	600	600	52.83
TCONS_00000192	XLOC_000175	NA	MGG_02253	TSS183	=	MGG_02253T0	supercont8.1:1156145-1160798	2972	9.27694	11.5739	12.0908	7.54312	8.19693	14.3954	10.038	10.2882	cell surface protein (993 nt)	2972	993	63.34
TCONS_00000193	XLOC_000176	NA	MGG_02255	TSS184	=	MGG_02255T0	supercont8.1:1163989-1164634	645	0	0.07512	0	0	0	0.123734	0	0.101626	hypothetical protein (645 nt)	645	645	62.02
TCONS_00000194	XLOC_000177	NA	MGG_02257	TSS185	=	MGG_02257T0	supercont8.1:1167868-1169155	954	1.78301	1.62484	1.51073	1.56256	2.27574	1.67728	1.50921	1.68804	hypothetical protein (954 nt)	954	954	66.04
TCONS_00000197	XLOC_000180	NA	MGG_02267	TSS188	=	MGG_02267T0	supercont8.1:1207813-1209457	1543	0	0.100885	0	0	0	0.0989088	0	0.203745	hypothetical protein (1113 nt)	1543	1113	53.1
TCONS_00000198	XLOC_000181	NA	MGG_02268	TSS189	=	MGG_02268T0	supercont8.1:1209988-1211926	1938	20.3261	7.70442	19.126	21.316	20.5363	7.86997	7.15372	8.08956	hypothetical protein (1551 nt)	1938	1551	53.32
TCONS_00000199	XLOC_000182	NA	MGG_02274	TSS190	=	MGG_02274T0	supercont8.1:1229103-1230049	870	0	2.01308	0	0	0	1.69761	2.64707	1.69456	hypothetical protein (870 nt)	870	870	63.56
TCONS_00000203	XLOC_000186	NA	MGG_02283	TSS194	=	MGG_02283T0	supercont8.1:1256931-1257387	456	60.3507	14.5656	61.1335	59.4129	60.5058	16.5509	11.3924	15.7535	hypothetical protein (456 nt)	456	456	56.14
TCONS_00000206	XLOC_000189	NA	MGG_02288	TSS197	=	MGG_02288T0	supercont8.1:1273077-1275873	660	1.44486	0.499109	1.11394	1.70069	1.51996	0.217829	0.689384	0.590113	hypothetical protein (660 nt)	660	660	59.7
TCONS_00000207	XLOC_000190	NA	MGG_02290	TSS198	=	MGG_02290T0	supercont8.1:1276286-1277758	969	0.606809	0.118346	0.803912	0.306453	0.710063	0	0.236797	0.118239	hypothetical protein (903 nt)	969	903	57.7
TCONS_00000208	XLOC_000191	NA	MGG_14591	TSS199	=	MGG_14591T0	supercont8.1:1280545-1282469	1617	0.0186596	0.118927	0.0559789	0	0	0.195694	0.0967043	0.0643823	cytochrome P450 3A24 (1617 nt)	1617	1617	57.82
TCONS_00000209	XLOC_000192	NA	MGG_14590	TSS200	=	MGG_14590T0	supercont8.1:1283517-1285068	1472	0.166051	0.392811	0.189486	0.18572	0.122947	0.31768	0.358931	0.501823	hypothetical protein (1344 nt)	1472	1344	64.73
TCONS_00000212	XLOC_000195	NA	MGG_02295	TSS203	=	MGG_02295T0	supercont8.1:1291238-1292700	1404	2.87563	1.19829	2.82418	3.40024	2.40248	1.43554	0.98568	1.17365	hypothetical protein (1404 nt)	1404	1404	55.41
TCONS_00000216	XLOC_000199	NA	MGG_02302	TSS207	=	MGG_02302T0	supercont8.1:1307894-1310270	1350	1.14947	2.06137	0.922574	1.57428	0.951557	1.82212	2.10316	2.25883	HhH-GPD family base excision DNA repair protein (1149 nt)	1350	1149	64.84
TCONS_00000217	XLOC_000200	NA	MGG_02305	TSS208	=	MGG_02305T0	supercont8.1:1314943-1316362	1419	1.5168	0.920242	1.65344	1.55011	1.34686	1.15159	0.823822	0.785312	hypothetical protein (1419 nt)	1419	1419	57.58
TCONS_00000218	XLOC_000201	NA	MGG_02306	TSS209	=	MGG_02306T0	supercont8.1:1316739-1317973	1234	3.14112	3.42142	3.12696	3.57627	2.72012	2.94656	3.96988	3.34782	abhydrolase (828 nt)	1234	828	69.44
TCONS_00000220	XLOC_000203	NA	MGG_02308	TSS211	=	MGG_02308T0	supercont8.1:1322718-1326286	1413	5.5925	2.51795	6.75066	5.25738	4.76945	3.11656	2.10732	2.32996	hypothetical protein (828 nt)	1413	828	64.61
TCONS_00000221	XLOC_000204	NA	MGG_02310	TSS212	=	MGG_02310T0	supercont8.1:1329973-1331356	1383	0.328843	0.0361259	0.389947	0.266181	0.3304	0.031321	0	0.0770568	hypothetical protein (1383 nt)	1383	1383	58.57
TCONS_00000222	XLOC_000205	NA	MGG_16092	TSS213	=	MGG_16092T0	supercont8.1:1332703-1333160	366	0	0.0923967	0	0	0	0.27719	0	0	hypothetical protein (366 nt)	366	366	55.19
TCONS_00000223	XLOC_000206	NA	MGG_02313	TSS214	=	MGG_02313T0	supercont8.1:1342364-1352372	9897	0.66324	0.237158	0.585564	0.659897	0.74426	0.224987	0.241047	0.245439	hypothetical protein (9897 nt)	9897	9897	50.85
TCONS_00000225	XLOC_000208	NA	MGG_16094	TSS216	=	MGG_16094T0	supercont8.1:1355674-1358159	1275	0.255316	0.351793	0.400453	0.292806	0.0726896	0.419235	0.33949	0.296653	hypothetical protein (1275 nt)	1275	1275	51.29
TCONS_00000229	XLOC_000212	NA	MGG_02328	TSS220	=	MGG_02328T0	supercont8.1:1421692-1424139	2367	3.35438	2.62579	4.04566	2.62038	3.3971	2.8573	2.46955	2.55052	methionine permease (1686 nt)	2367	1686	60.97
TCONS_00000230	XLOC_000213	NA	MGG_02329	TSS221	=	MGG_02329T0	supercont8.1:1425483-1427874	2179	1.45131	0.215377	1.29715	1.4742	1.58258	0.276738	0.13864	0.230754	isotrichodermin C-15 hydroxylase (1632 nt)	2179	1632	55.02
TCONS_00000231	XLOC_000214	NA	MGG_02331	TSS222	=	MGG_02331T0	supercont8.1:1431570-1433075	1446	4.0258	70.8205	5.27592	3.47564	3.32583	83.8361	64.8504	63.7748	hypothetical protein (1131 nt)	1446	1131	66.67
TCONS_00000232	XLOC_000215	NA	MGG_02332	TSS223	=	MGG_02332T0	supercont8.1:1434443-1435253	810	0	0.147268	0	0	0	0.0696624	0.148977	0.223166	hypothetical protein (810 nt)	810	810	61.98
TCONS_00000233	XLOC_000216	NA	MGG_02334	TSS224	=	MGG_02334T0	supercont8.1:1439576-1440073	381	0	0.0817925	0	0	0	0	0	0.245377	hypothetical protein (381 nt)	381	381	56.17
TCONS_00000235	XLOC_000218	NA	MGG_02337	TSS226	=	MGG_02337T0	supercont8.1:1449881-1451446	1451	2.64927	0.503134	2.8033	2.76944	2.37506	0.488391	0.437915	0.583097	retinol dehydrogenase 8 (837 nt)	1451	837	60.22
TCONS_00000236	XLOC_000219	NA	MGG_02338	TSS227	=	MGG_02338T0	supercont8.1:1452968-1453559	591	0.446802	0	0.744021	0.199722	0.396662	0	0	0	hypothetical protein (591 nt)	591	591	62.27
TCONS_00000237	XLOC_000220	NA	MGG_02340	TSS228	=	MGG_02340T0	supercont8.1:1456212-1457604	1218	0.909574	9.73447	0.724814	1.2365	0.767408	9.81759	10.3038	9.08198	cell wall glycosyl hydrolase YteR (1218 nt)	1218	1218	62.56
TCONS_00000239	XLOC_000222	NA	MGG_02342	TSS230	=	MGG_02342T0	supercont8.1:1461739-1464389	2559	0.349026	0.388964	0.38019	0.401256	0.265631	0.449834	0.349082	0.367976	hypothetical protein (2559 nt)	2559	2559	59.2
TCONS_00000242	XLOC_000225	NA	MGG_02347	TSS233	=	MGG_02347T0	supercont8.1:1485176-1485927	668	1.51879	2.14514	1.88947	1.50472	1.16218	2.08123	2.32368	2.03051	hypothetical protein (414 nt)	668	414	61.59
TCONS_00000243	XLOC_000226	NA	MGG_11945	TSS234	=	MGG_11945T0	supercont8.1:1486825-1489808	2886	5.53167	16.6552	7.11146	4.6999	4.78366	19.5743	15.2655	15.1257	candidapepsin (1491 nt)	2886	1491	62.98
TCONS_00000244	XLOC_000227	NA	MGG_02348	TSS235	=	MGG_02348T0	supercont8.1:1491589-1496700	3837	0.0221562	0.00419647	0.0230615	0.0434072	0	0	0.0125894	0	multidrug resistance protein 3 (3810 nt)	3837	3810	62.31
TCONS_00000245	XLOC_000228	NA	MGG_02351	TSS236	=	MGG_02351T0	supercont8.1:1499424-1515742	15858	0.00335241	0.00790177	0	0.0050463	0.00501094	0.00615096	0.00878316	0.00877119	tyrocidine synthetase 1 (15858 nt)	15858	15858	66.75
TCONS_00000246	XLOC_000229	NA	MGG_02355	TSS237	=	MGG_02355T0	supercont8.1:1532318-1533407	1089	7.92188	13.9583	5.51262	10.7007	7.55231	11.6004	15.7365	14.5379	hypothetical protein (687 nt)	1089	687	65.79
TCONS_00000247	XLOC_000230	NA	MGG_16105	TSS238	=	MGG_16105T0	supercont8.1:1542565-1545047	480	5.95e-05	6.86e-05	0	0	0.000178514	0.000205807	0	0	hypothetical protein (174 nt)	480	174	66.09
TCONS_00000248	XLOC_000230	NA	MGG_16105	TSS238	=	MGG_16105T1	supercont8.1:1542565-1545047	457	0.0998931	0.112725	0	0	0.299679	0.338175	0	0	hypothetical protein, variant (174 nt)	457	174	66.09
TCONS_00000249	XLOC_000231	NA	MGG_14575	TSS239	=	MGG_14575T0	supercont8.1:1553680-1557027	2751	23.4862	70.9467	22.6584	24.2769	23.5234	70.265	71.8917	70.6835	hypothetical protein (1542 nt)	2751	1542	63.55
TCONS_00000250	XLOC_000232	NA	MGG_11936	TSS240	=	MGG_11936T0	supercont8.1:1563145-1566327	3182	1.87544	3.09196	2.14301	2.0906	1.39273	2.97149	3.19268	3.1117	FAD binding domain-containing protein (1872 nt)	3182	1872	65.97
TCONS_00000251	XLOC_000233	NA	MGG_02368	TSS241	=	MGG_02368T0	supercont8.1:1569389-1572031	2642	71.2621	65.4687	65.5753	75.1384	73.0726	60.9246	68.442	67.0394	galactose oxidase (2010 nt)	2642	2010	67.46
TCONS_00000252	XLOC_000234	NA	MGG_02369	TSS242	=	MGG_02369T0	supercont8.1:1572441-1573445	630	0.300211	0.244166	0.17468	0.545415	0.180539	0.311576	0.315796	0.105125	hypothetical protein (630 nt)	630	630	53.97
TCONS_00000253	XLOC_000235	NA	MGG_02372	TSS243	=	MGG_02372T0	supercont8.1:1580504-1581438	934	9.46163	2.43602	9.82081	11.127	7.43705	2.59933	2.23202	2.47669	hypothetical protein (729 nt)	934	729	56.93
TCONS_00000254	XLOC_000236	NA	MGG_02373	TSS244	=	MGG_02373T0	supercont8.1:1582439-1583630	993	4.65265	2.12112	5.66379	4.26035	4.03381	2.28844	2.64134	1.43358	arabinan endo-1,5-alpha-L-arabinosidase A (993 nt)	993	993	65.76
TCONS_00000255	XLOC_000237	NA	MGG_02376	TSS245	=	MGG_02376T0	supercont8.1:1590244-1594532	3982	171.493	42.5466	168.738	172.449	173.293	41.4208	43.0541	43.1648	hormone-sensitive lipase (2355 nt)	3982	2355	57.15
TCONS_00000256	XLOC_000238	NA	MGG_16108	TSS246	=	MGG_16108T0	supercont8.1:1598771-1599379	608	0.59153	0.427321	0.818446	0.765983	0.190162	0.395641	0.443455	0.442866	hypothetical protein (276 nt)	608	276	57.25
TCONS_00000258	XLOC_000240	NA	MGG_02377	TSS248	=	MGG_02377T0	supercont8.1:1609862-1615708	3269	4.32251	6.50956	3.35874	4.78284	4.82595	5.14571	6.95044	7.43253	hypothetical protein (2652 nt)	3269	2652	64.22
TCONS_00000259	XLOC_000241	NA	MGG_02382	TSS249	=	MGG_02382T0	supercont8.1:1627464-1628205	630	0	0.104572	0	0	0	0.103185	0.210531	0	hypothetical protein (426 nt)	630	426	55.4
TCONS_00000260	XLOC_000242	NA	MGG_02384	TSS250	=	MGG_02384T0	supercont8.1:1630183-1632301	2052	15.318	15.6119	17.0233	14.601	14.3297	16.9106	15.5031	14.422	mannosyltransferase (1479 nt)	2052	1479	61.19
TCONS_00000261	XLOC_000243	NA	MGG_02385	TSS251	=	MGG_02385T0	supercont8.1:1632508-1636751	4158	17.3574	16.2816	12.6239	19.1078	20.3405	13.2224	17.7134	17.9089	hypothetical protein (3171 nt)	4158	3171	58.44
TCONS_00000262	XLOC_000244	NA	MGG_02386	TSS252	=	MGG_02386T0	supercont8.1:1637003-1639203	1967	53.2155	39.8262	52.2431	54.0236	53.3797	40.4992	39.2709	39.7086	hypothetical protein (1065 nt)	1967	1065	63.19
TCONS_00000263	XLOC_000245	NA	MGG_16115	TSS253	=	MGG_16115T0	supercont8.1:1656139-1656852	713	0.0508866	0.058907	0	0.15266	0	0	0.0884195	0.0883014	hypothetical protein (222 nt)	713	222	55.86
TCONS_00000264	XLOC_000246	NA	MGG_02391	TSS254	=	MGG_02391T0	supercont8.1:1667772-1669830	1903	62.555	82.4108	57.8299	65.9065	63.9286	73.0564	87.3884	86.7875	hypothetical protein (1233 nt)	1903	1233	61.48
TCONS_00000265	XLOC_000247	NA	MGG_02392	TSS255	=	MGG_02392T0	supercont8.1:1673904-1674361	192	15494.7	8840.42	14720.4	15793.9	15969.9	8336.17	9158.5	9026.6	40S ribosomal protein S30 (192 nt)	192	192	59.9
TCONS_00000266	XLOC_000248	NA	MGG_02393	TSS256	=	MGG_02393T0	supercont8.1:1675506-1677070	1327	0.392466	0.134866	0.342272	0.419029	0.416098	0.202214	0.161952	0.0404333	cutinase (864 nt)	1327	864	62.73
TCONS_00000267	XLOC_000249	NA	MGG_02394	TSS257	=	MGG_02394T0	supercont8.1:1680769-1682287	1458	5.95101	6.81628	4.50192	7.13559	6.21551	5.94245	7.18556	7.32081	malic acid transporter (1458 nt)	1458	1458	57.75
TCONS_00000268	XLOC_000250	NA	MGG_16116	TSS258	=	MGG_16116T0	supercont8.1:1689811-1694452	4641	3.96022	4.84212	4.24464	3.87572	3.7603	4.6631	5.17718	4.68608	hypothetical protein (3867 nt)	4641	3867	53.76
TCONS_00000269	XLOC_000251	NA	MGG_11917	TSS259	=	MGG_11917T0	supercont8.1:1698010-1703246	5142	16.3401	25.392	14.5327	17.368	17.1194	23.129	27.0742	25.9729	hypothetical protein (4332 nt)	5142	4332	55.54
TCONS_00000271	XLOC_000253	NA	MGG_16118	TSS261	=	MGG_16118T0	supercont8.1:1715304-1715536	195	13.4682	2.27724	14.2287	13.1334	13.0426	6.83172	0	0	hypothetical protein (195 nt)	195	195	56.41
TCONS_00000272	XLOC_000254	NA	MGG_16119	TSS262	=	MGG_16119T0	supercont8.1:1716210-1716980	770	1.10392	0.0855564	0.844079	1.3752	1.09248	0.0975538	0	0.159115	hypothetical protein (237 nt)	770	237	56.54
TCONS_00000273	XLOC_000255	NA	MGG_11916	TSS263	=	MGG_11916T0	supercont8.1:1717070-1719173	1931	1013.01	430.635	917.699	1061.26	1060.07	398.179	446.348	447.378	CAP20 (561 nt)	1931	561	53.65
TCONS_00000274	XLOC_000256	NA	MGG_02400	TSS264	=	MGG_02400T0	supercont8.1:1719464-1721023	1486	99.6068	30.8844	99.5046	103.059	96.2571	31.6265	31.208	29.8185	pirin (1143 nt)	1486	1143	60.19
TCONS_00000275	XLOC_000257	NA	MGG_02402	TSS265	=	MGG_02402T0	supercont8.1:1726886-1727219	246	8.66459	18.8809	4.58765	10.7389	10.6672	17.1495	18.8995	20.5936	hypothetical protein (246 nt)	246	246	66.26
TCONS_00000277	XLOC_000259	NA	MGG_02406	TSS267	=	MGG_02406T0	supercont8.1:1738646-1741244	2598	14.9806	15.2038	15.7003	14.9016	14.3399	14.9729	15.1104	15.5281	Nulp1-pending protein (2298 nt)	2598	2298	52.35
TCONS_00000278	XLOC_000260	NA	MGG_02407	TSS268	=	MGG_02407T0	supercont8.1:1741780-1742668	777	1220.5	904.993	932.673	1373.33	1355.51	693.076	1018.94	1002.96	hypothetical protein (261 nt)	777	261	60.15
TCONS_00000279	XLOC_000261	NA	MGG_16121	TSS269	=	MGG_16121T0	supercont8.1:1743277-1744448	349	0.343766	0.796851	0.52075	0	0.510548	0.909053	0.593053	0.888447	hypothetical protein (252 nt)	349	252	47.62
TCONS_00000280	XLOC_000262	NA	MGG_02408	TSS270	=	MGG_02408T0	supercont8.1:1744597-1748667	3877	13.9445	11.8821	14.045	13.8682	13.9203	11.841	11.5063	12.2989	hypothetical protein (2787 nt)	3877	2787	55.69
TCONS_00000281	XLOC_000263	NA	MGG_02409	TSS271	=	MGG_02409T0	supercont8.1:1749342-1751207	1865	19.2561	62.316	19.7041	18.7924	19.2719	65.3185	60.9931	60.6364	nonspecific lipid-transfer protein (1392 nt)	1865	1392	65.8
TCONS_00000282	XLOC_000264	NA	MGG_02410	TSS272	=	MGG_02410T0	supercont8.1:1753494-1755243	1622	729.744	213.692	734.066	735.52	719.647	211.126	215.088	214.861	erythrocyte band 7 integral membrane protein (1083 nt)	1622	1083	59.1
TCONS_00000283	XLOC_000265	NA	MGG_02411	TSS273	=	MGG_02411T0	supercont8.1:1755474-1762050	1491	1.01821	2.93882	1.17048	0.914982	0.969154	2.80858	2.65253	3.35533	hypothetical protein (1191 nt)	1491	1191	64.74
TCONS_00000284	XLOC_000266	NA	MGG_02413	TSS274	=	MGG_02413T0	supercont8.1:1755474-1762050	2260	30.7876	18.0433	24.9298	32.4616	34.9713	13.9741	20.1138	20.0422	hypothetical protein (507 nt)	2260	507	63.51
TCONS_00000286	XLOC_000268	NA	MGG_16123	TSS276	=	MGG_16123T0	supercont8.1:1765044-1765512	417	0.125085	0.291007	0.375255	0	0	0.667052	0.205968	0	hypothetical protein (417 nt)	417	417	50.12
TCONS_00000287	XLOC_000269	NA	MGG_02417	TSS277	=	MGG_02417T0	supercont8.1:1770205-1772800	2341	71.9911	23.9802	80.3434	68.0714	67.5583	26.5107	23.0293	22.4007	ATP-dependent rRNA helicase spb-4 (1911 nt)	2341	1911	52.54
TCONS_00000288	XLOC_000270	NA	MGG_02418	TSS278	=	MGG_02418T0	supercont8.1:1772903-1776198	3107	30.2534	43.056	31.6062	29.1264	30.0276	46.03	41.3928	41.7454	vesicular-fusion protein SEC18 (2508 nt)	3107	2508	56.66
TCONS_00000289	XLOC_000271	NA	MGG_16124	TSS279	=	MGG_16124T0	supercont8.1:1777890-1778693	742	0	0.0279125	0	0	0	0	0.0837374	0	hypothetical protein (327 nt)	742	327	52.29
TCONS_00000290	XLOC_000272	NA	MGG_02419	TSS280	=	MGG_02419T0	supercont8.1:1780449-1787962	7234	11.8389	11.5927	11.3933	11.858	12.2655	11.2774	11.5955	11.905	guanine nucleotide exchange factor LTE1 (5592 nt)	7234	5592	54.79
TCONS_00000291	XLOC_000273	NA	MGG_02424	TSS281	=	MGG_02424T0	supercont8.1:1801089-1806815	1158	3.07284	6.56342	3.32358	3.61229	2.28266	5.89854	7.13829	6.65342	ubiquitin/metalloprotease fusion protein (1158 nt)	1158	1158	65.11
TCONS_00000292	XLOC_000274	NA	MGG_14578	TSS282	=	MGG_14578T0	supercont8.1:1801089-1806815	855	0	0.0231072	0	0	0	0	0	0.0693215	hypothetical protein (855 nt)	855	855	51.46
TCONS_00000293	XLOC_000275	NA	MGG_02428	TSS283	=	MGG_02428T0	supercont8.1:1829284-1831970	2602	25.7295	9.00172	26.1695	25.55	25.4689	9.36096	8.47596	9.16824	hypothetical protein (2253 nt)	2602	2253	55.04
TCONS_00000294	XLOC_000276	NA	MGG_02430	TSS284	=	MGG_02430T0	supercont8.1:1833833-1834769	936	21.0612	35.8788	21.0736	21.6605	20.4496	34.5979	36.8527	36.1857	diphthamide biosynthesis protein 3 (285 nt)	936	285	61.4
TCONS_00000295	XLOC_000277	NA	MGG_02433	TSS285	=	MGG_02433T0	supercont8.1:1841515-1843393	782	11.1846	6.43434	11.3985	11.989	10.1663	5.73305	7.17946	6.39051	hypothetical protein (423 nt)	782	423	54.37
TCONS_00000296	XLOC_000278	NA	MGG_02435	TSS286	=	MGG_02435T0	supercont8.1:1843519-1844778	1191	28.0767	29.311	28.3766	29.3694	26.4841	28.1106	30.0004	29.8221	mitochondrial iron uptake protein (609 nt)	1191	609	57.64
TCONS_00000297	XLOC_000279	NA	MGG_02436	TSS287	=	MGG_02436T0	supercont8.1:1845167-1846130	963	25.4309	10.3343	22.7401	26.9727	26.5799	9.59916	10.3811	11.0225	hypothetical protein (459 nt)	963	459	53.38
TCONS_00000298	XLOC_000280	NA	MGG_02437	TSS288	=	MGG_02437T0	supercont8.1:1846134-1851010	2362	46.8197	21.5473	48.2321	47.0933	45.1336	22.0627	21.3675	21.2118	palmitoyltransferase PFA3 (1833 nt)	2362	1833	62.3
TCONS_00000299	XLOC_000281	NA	MGG_02440	TSS289	=	MGG_02440T0	supercont8.1:1857431-1863769	3633	18.0379	8.77668	18.6431	18.4392	17.0315	8.45853	8.74859	9.12293	mitochondrial presequence protease (3060 nt)	3633	3060	52.97
TCONS_00000300	XLOC_000282	NA	MGG_02441	TSS290	=	MGG_02441T0	supercont8.1:1865582-1873250	2310	155.834	88.655	173.301	148.828	145.374	93.7977	88.6547	83.5125	ornithine decarboxylase (1380 nt)	2310	1380	56.88
TCONS_00000301	XLOC_000283	NA	MGG_02443	TSS291	=	MGG_02443T0	supercont8.1:1873534-1877343	3197	15.7595	19.952	18.1795	14.64	14.4591	21.9446	18.755	19.1565	hypothetical protein (2646 nt)	3197	2646	51.4
TCONS_00000302	XLOC_000284	NA	MGG_02444	TSS292	=	MGG_02444T0	supercont8.1:1894213-1900586	6373	19.5734	9.55024	19.0048	20.0996	19.6157	9.01035	9.78237	9.858	phosphoinositide-specific phospholipase C (3438 nt)	6373	3438	53.87
TCONS_00000303	XLOC_000285	NA	MGG_02445	TSS293	=	MGG_02445T0	supercont8.1:1901562-1902461	899	2.79859	0.989719	2.46756	2.47086	3.45735	1.14796	1.04128	0.779914	hypothetical protein (801 nt)	899	801	59.93
TCONS_00000304	XLOC_000286	NA	MGG_11906	TSS294	=	MGG_11906T0	supercont8.1:1902822-1903872	873	3.18243	1.1448	4.08974	2.09917	3.35838	1.54343	1.08118	0.809794	hypothetical protein (711 nt)	873	711	54.01
TCONS_00000305	XLOC_000287	NA	MGG_02446	TSS295	=	MGG_02446T0	supercont8.1:1904007-1905763	1638	24.7574	43.6464	23.6585	26.351	24.2626	43.1983	43.6145	44.1265	ubiquitin-conjugating enzyme (900 nt)	1638	900	63.89
TCONS_00000306	XLOC_000288	NA	MGG_02449	TSS296	=	MGG_02449T0	supercont8.1:1913923-1915820	1524	100.105	99.1917	100.954	102.431	96.9302	100.704	99.0534	97.8173	tyrosyl-tRNA synthetase (1167 nt)	1524	1167	52.87
TCONS_00000307	XLOC_000289	NA	MGG_02450	TSS297	=	MGG_02450T0	supercont8.1:1917029-1919394	2279	43.4394	35.1536	48.7077	41.4967	40.1139	38.412	33.2394	33.8095	hypothetical protein (1416 nt)	2279	1416	58.97
TCONS_00000308	XLOC_000290	NA	CYN1	TSS298	=	MGG_02451T0	supercont8.1:1920203-1921492	1020	48.1108	78.2067	59.543	40.5379	44.2516	93.1349	72.4276	69.0575	cyanate hydratase (489 nt)	1020	489	58.49
TCONS_00000309	XLOC_000291	NA	MGG_02453	TSS299	=	MGG_02453T0	supercont8.1:1923810-1925701	1732	40.5877	23.2197	39.606	41.0947	41.0625	22.3312	23.382	23.946	rRNA processing protein Ebp2 (1341 nt)	1732	1341	60.1
TCONS_00000310	XLOC_000292	NA	MGG_11903	TSS300	=	MGG_11903T0	supercont8.1:1935796-1941497	2297	20.7119	28.0053	20.5789	20.4578	21.0988	27.9357	28.9855	27.0948	cation efflux family protein family (1524 nt)	2297	1524	59.65
TCONS_00000312	XLOC_000294	NA	MGG_02457	TSS302	=	MGG_02457T0	supercont8.1:1949458-1952068	1966	43.6671	66.1282	37.5457	47.4034	46.0522	57.3294	71.4679	69.5874	GTP-binding protein rho2 (603 nt)	1966	603	53.23
TCONS_00000313	XLOC_000295	NA	YTM1	TSS303	=	MGG_02460T0	supercont8.1:1955972-1957862	1817	19.6377	14.7406	18.7993	19.8359	20.2779	14.3701	14.3569	15.4946	ribosome biogenesis protein YTM1 (1455 nt)	1817	1455	54.64
TCONS_00000314	XLOC_000296	NA	MGG_02462	TSS304	=	MGG_02462T0	supercont8.1:1960829-1963124	869	245.933	81.1715	250.206	243.307	244.287	78.9952	79.6658	84.8537	U6 snRNA-associated Sm-like protein LSm5 (249 nt)	869	249	49
TCONS_00000315	XLOC_000297	NA	MGG_02465	TSS305	=	MGG_02465T0	supercont8.1:1968259-1970833	2209	59.4252	47.1328	61.111	56.5196	60.645	49.4307	46.4813	45.4863	Delta(24(24(1)))-sterol reductase (1767 nt)	2209	1767	55.86
TCONS_00000316	XLOC_000298	NA	MGG_02467	TSS306	=	MGG_02467T0	supercont8.1:1972642-1973587	737	104.654	60.2014	104.603	105.192	104.168	61.1021	61.1	58.402	ribonucleoprotein-associated protein (381 nt)	737	381	60.37
TCONS_00000317	XLOC_000299	NA	MGG_02468	TSS307	=	MGG_02468T0	supercont8.1:1974192-1978908	3234	21.0273	16.179	21.9535	19.8459	21.2825	16.5901	15.6451	16.3018	hypothetical protein (2862 nt)	3234	2862	52.9
TCONS_00000318	XLOC_000300	NA	MGG_16129	TSS308	=	MGG_16129T0	supercont8.1:1979204-1979920	300	0.29131	1.15302	0.87393	0	0	2.5922	0	0.866858	hypothetical protein (300 nt)	300	300	52.33
TCONS_00000319	XLOC_000301	NA	MGG_02471	TSS309	=	MGG_02471T0	supercont8.1:1980314-1983105	2312	224.613	254.409	258.089	205.182	210.568	283.866	237.301	242.061	transketolase (2064 nt)	2312	2064	57.56
TCONS_00000320	XLOC_000302	NA	MGG_02473	TSS310	=	MGG_02473T0	supercont8.1:1985441-1987751	2079	24.4169	35.1086	22.4143	24.5876	26.2488	33.0573	36.6208	35.6478	hypothetical protein (1668 nt)	2079	1668	63.73
TCONS_00000321	XLOC_000303	NA	MGG_02475	TSS311	=	MGG_02475T0	supercont8.1:1993240-1996225	2654	74.13	75.2455	87.5361	66.6709	68.1832	88.4749	69.6369	67.6246	vitamin H transporter 1/biotin symporter vht1 (1638 nt)	2654	1638	57.26
TCONS_00000322	XLOC_000304	NA	MGG_11899	TSS312	=	MGG_11899T0	supercont8.1:2005668-2009736	3679	16.066	18.6885	15.4858	16.0857	16.6264	17.1375	19.6219	19.3061	SH3 domain-containing protein (3039 nt)	3679	3039	56.14
TCONS_00000323	XLOC_000305	NA	MGG_02477	TSS313	=	MGG_02477T0	supercont8.1:2010174-2012031	1685	19.4723	19.3916	22.2507	18.6224	17.5438	23.8338	17.7202	16.6209	hypothetical protein (1161 nt)	1685	1161	55.56
TCONS_00000324	XLOC_000306	NA	MGG_02478	TSS314	=	MGG_02478T0	supercont8.1:2012763-2016420	3509	32.1953	37.6956	31.1774	32.5578	32.8508	36.1037	39.4856	37.4976	hypothetical protein (1728 nt)	3509	1728	56.13
TCONS_00000325	XLOC_000307	NA	MGG_02479	TSS315	=	MGG_02479T0	supercont8.1:2016893-2018285	878	347.806	416.533	429.677	310.138	303.604	500.219	376.785	372.594	nuclear transport factor 2 (381 nt)	878	381	54.33
TCONS_00000326	XLOC_000308	NA	TVP18	TSS316	=	MGG_11897T0	supercont8.1:2019746-2020576	450	159.38	150.224	172.665	152.651	152.825	160.614	151.757	138.301	golgi apparatus membrane protein TVP18 (450 nt)	450	450	55.11
TCONS_00000328	XLOC_000310	NA	MGG_02481	TSS318	=	MGG_02481T0	supercont8.1:2023273-2031105	3947	77.6747	52.2943	80.6362	75.9685	76.4196	51.8701	53.4519	51.5609	hypothetical protein (2796 nt)	3947	2796	57.12
TCONS_00000329	XLOC_000311	NA	MGG_02483	TSS319	=	MGG_02483T0	supercont8.1:2031282-2034150	1997	4.65135	5.87727	5.64954	3.99199	4.31253	5.83576	5.95288	5.84319	hypothetical protein (1341 nt)	1997	1341	53.91
TCONS_00000330	XLOC_000312	NA	MGG_02485	TSS320	=	MGG_02485T0	supercont8.1:2034459-2036947	2423	48.1228	52.0626	46.7849	49.4227	48.1607	50.7821	52.7181	52.6877	hypothetical protein (1365 nt)	2423	1365	54.65
TCONS_00000331	XLOC_000313	NA	MGG_02486	TSS321	=	MGG_02486T0	supercont8.1:2037563-2040518	2571	10.9156	13.6414	10.2023	11.4113	11.1332	13.3889	13.6612	13.8739	TTL domain-containing protein (2571 nt)	2571	2571	60.79
TCONS_00000332	XLOC_000314	NA	MGG_02487	TSS322	=	MGG_02487T0	supercont8.1:2045781-2051724	5611	57.7974	47.5412	60.4652	56.5674	56.3595	48.9743	46.9454	46.704	plasma membrane calcium-transporting ATPase 3 (4344 nt)	5611	4344	55.71
TCONS_00000333	XLOC_000315	NA	MGG_02488	TSS323	=	MGG_02488T0	supercont8.1:2053801-2056754	2835	8.77365	13.559	10.0592	8.23402	8.0277	16.4319	12.4865	11.7585	NAD-dependent histone deacetylase SIR2 (1698 nt)	2835	1698	57.48
TCONS_00000334	XLOC_000316	NA	MGG_02489	TSS324	=	MGG_02489T0	supercont8.1:2061266-2064494	1968	33.094	19.5971	37.6642	30.0507	31.567	21.4295	18.7194	18.6424	branched-chain-amino-acid aminotransferase (1215 nt)	1968	1215	58.19
TCONS_00000335	XLOC_000317	NA	MGG_02492	TSS325	=	MGG_02492T0	supercont8.1:2070787-2076124	1790	7.97591	10.147	7.77711	8.17775	7.97287	10.6526	9.94399	9.84442	hypothetical protein (1161 nt)	1790	1161	61.15
TCONS_00000336	XLOC_000318	NA	MGG_16131	TSS326	=	MGG_16131T0	supercont8.1:2076295-2078323	1877	3.43851	3.66227	3.43543	2.81989	4.06022	3.63299	3.87005	3.48377	hypothetical protein (1416 nt)	1877	1416	52.9
TCONS_00000338	XLOC_000320	NA	MGG_16133	TSS328	=	MGG_16133T0	supercont8.1:2083704-2085572	1769	0.186423	0.24271	0.0584396	0.301341	0.199488	0.233353	0.262108	0.23267	hypothetical protein (1536 nt)	1769	1536	57.29
TCONS_00000339	XLOC_000321	NA	MGG_11894	TSS329	=	MGG_11894T0	supercont8.1:2086738-2087512	696	0	0.0304313	0	0	0	0	0	0.0912939	hypothetical protein (696 nt)	696	696	64.22
TCONS_00000340	XLOC_000322	NA	MGG_11893	TSS330	=	MGG_11893T0	supercont8.1:2088310-2089906	1596	0.378705	0.0871457	0.349303	0.338558	0.448253	0.0979371	0.0981531	0.0653469	hypothetical protein (1596 nt)	1596	1596	52.44
TCONS_00000345	XLOC_000327	NA	MGG_02502	TSS335	=	MGG_02502T0	supercont8.1:2125789-2127869	1851	2.2249	3.74124	2.34675	2.05265	2.2753	3.80984	3.87543	3.53845	hypothetical protein (690 nt)	1851	690	61.3
TCONS_00000347	XLOC_000329	NA	MGG_11889	TSS337	=	MGG_11889T0	supercont8.1:2135975-2140550	2431	63.6931	47.3731	72.2066	61.2657	57.6071	51.6373	45.7839	44.698	T-complex protein 1 subunit epsilon (1653 nt)	2431	1653	53.42
TCONS_00000348	XLOC_000330	NA	MGG_11888	TSS338	=	MGG_11888T0	supercont8.1:2141984-2149377	5050	7.93591	11.9299	8.75166	7.61939	7.43668	12.714	11.5127	11.5631	hypothetical protein (4113 nt)	5050	4113	53.98
TCONS_00000349	XLOC_000331	NA	MGG_02507	TSS339	=	MGG_02507T0	supercont8.1:2149937-2152747	2810	17.1496	10.1327	16.2254	19.1344	16.0888	9.49645	10.2565	10.6453	inulinase (1893 nt)	2810	1893	56.21
TCONS_00000350	XLOC_000332	NA	MGG_11887	TSS340	=	MGG_11887T0	supercont8.1:2156410-2158879	1641	5.33589	3.05353	5.54967	4.97497	5.48304	3.04649	3.17	2.94411	hypothetical protein (801 nt)	1641	801	57.05
TCONS_00000351	XLOC_000333	NA	MGG_02511	TSS341	=	MGG_02511T0	supercont8.1:2161001-2163435	1515	32.4395	26.1361	30.7712	33.9574	32.5899	24.656	27.3281	26.4242	50S ribosomal protein L3 (1167 nt)	1515	1167	66.15
TCONS_00000352	XLOC_000334	NA	MGG_02513	TSS342	=	MGG_02513T0	supercont8.1:2163599-2170237	1111	12.0161	21.7692	11.8786	12.2562	11.9134	22.8607	22.2127	20.2343	hypothetical protein (741 nt)	1111	741	66.67
TCONS_00000353	XLOC_000335	NA	MGG_02516	TSS343	=	MGG_02516T0	supercont8.1:2172399-2178540	2010	52.0406	35.6161	49.3971	53.6582	53.0664	34.4077	36.7749	35.6657	hypothetical protein (1410 nt)	2010	1410	59.43
TCONS_00000354	XLOC_000336	NA	MGG_02518	TSS344	=	MGG_02518T0	supercont8.1:2178690-2181970	3142	3.29196	3.81039	3.24945	3.00411	3.62231	3.81309	3.78053	3.83754	ATP-dependent RNA helicase DHX8 (2016 nt)	3142	2016	51.69
TCONS_00000355	XLOC_000337	NA	MGG_02519	TSS345	=	MGG_02519T0	supercont8.1:2183038-2186765	3593	34.6474	44.7315	32.8988	34.8933	36.1503	41.9498	46.3088	45.9359	hypothetical protein (2268 nt)	3593	2268	59.08
TCONS_00000356	XLOC_000338	NA	MGG_02520	TSS346	=	MGG_02520T0	supercont8.1:2188848-2191988	2493	60.6895	66.3564	51.117	67.0426	63.9089	57.2784	71.2425	70.5482	hypothetical protein (1221 nt)	2493	1221	60.85
TCONS_00000357	XLOC_000339	NA	MGG_02523	TSS347	=	MGG_02523T0	supercont8.1:2200694-2203003	2133	13.9266	14.5358	11.7441	14.8065	15.2294	12.1443	15.4704	15.9927	hypothetical protein (1635 nt)	2133	1635	55.29
TCONS_00000358	XLOC_000340	NA	MGG_02525	TSS348	=	MGG_02525T0	supercont8.1:2204616-2206594	1748	189.904	209.344	206.073	181.672	181.967	226.08	199.622	202.329	alanine-glyoxylate aminotransferase 1 (1314 nt)	1748	1314	55.18
TCONS_00000359	XLOC_000341	NA	MGG_02526	TSS349	=	MGG_02526T0	supercont8.1:2206962-2211905	4460	55.1676	66.1499	63.1344	51.2625	51.1059	73.4063	63.1927	61.8506	exportin-1 (3246 nt)	4460	3246	52.31
TCONS_00000360	XLOC_000342	NA	MGG_06636	TSS350	=	MGG_06636T0	supercont8.1:2212731-2214256	1268	72.696	55.4335	73.0122	72.0582	73.0176	55.2362	55.6123	55.4519	class II Aldolase (966 nt)	1268	966	64.39
TCONS_00000362	XLOC_000344	NA	MGG_06639	TSS352	=	MGG_06639T0	supercont8.1:2235078-2239780	2340	57.5375	57.0533	60.0232	55.8682	56.7213	59.0498	56.0184	56.0918	T-complex protein 1 subunit gamma (1626 nt)	2340	1626	57.63
TCONS_00000363	XLOC_000345	NA	MGG_16143	TSS353	=	MGG_16143T0	supercont8.1:2235078-2239780	784	2.22957	4.16226	3.34089	2.148	1.19982	5.49128	3.96642	3.02908	hypothetical protein (501 nt)	784	501	55.09
TCONS_00000364	XLOC_000346	NA	MGG_06642	TSS354	=	MGG_06642T0	supercont8.1:2240181-2243152	2869	106.09	25.8359	98.8524	108.548	110.871	22.8167	26.7987	27.8924	phosphoglycerate mutase family domain-containing protein (1902 nt)	2869	1902	58.15
TCONS_00000365	XLOC_000347	NA	MGG_06644	TSS355	=	MGG_06644T0	supercont8.1:2247464-2250671	2637	66.9495	14.1266	78.9477	61.6322	60.2685	17.353	11.7902	13.2366	tartrate transporter (1521 nt)	2637	1521	54.17
TCONS_00000366	XLOC_000348	NA	MGG_11882	TSS356	=	MGG_11882T0	supercont8.1:2255033-2262189	7062	51.6094	16.4473	47.516	53.5809	53.7312	14.7298	16.8206	17.7913	sensor protein zRas (5985 nt)	7062	5985	55.05
TCONS_00000367	XLOC_000349	NA	MGG_06646	TSS357	=	MGG_06646T0	supercont8.1:2270462-2273102	2132	44.5054	88.028	40.228	46.442	46.8463	81.5466	89.6751	92.8624	hypothetical protein (567 nt)	2132	567	63.84
TCONS_00000368	XLOC_000350	NA	MGG_06651	TSS358	=	MGG_06651T0	supercont8.1:2288428-2294040	2418	39.0248	46.6631	37.8405	40.0396	39.1943	46.9598	46.2166	46.8129	hypothetical protein (1482 nt)	2418	1482	56.55
TCONS_00000369	XLOC_000351	NA	MGG_06653	TSS359	=	MGG_06653T0	supercont8.1:2297324-2298728	1305	416.323	403.65	466.182	395.357	387.429	453.493	383.502	373.954	hypothetical protein (708 nt)	1305	708	62.01
TCONS_00000370	XLOC_000352	NA	MGG_06658	TSS360	=	MGG_06658T0	supercont8.1:2307568-2310536	1111	1177.73	698.67	1353.36	1093.22	1086.6	791.091	652.774	652.144	40S ribosomal protein S5 (645 nt)	1111	645	57.52
TCONS_00000371	XLOC_000353	NA	MGG_06660	TSS361	=	MGG_06660T0	supercont8.1:2310928-2314878	1569	85.0781	62.2673	84.2609	86.2455	84.728	62.1886	59.9485	64.6648	3-oxoacyl-[acyl-carrier-protein] reductase (777 nt)	1569	777	60.62
TCONS_00000372	XLOC_000354	NA	MGG_06662	TSS362	=	MGG_06662T0	supercont8.1:2315292-2320796	5427	16.5098	8.42663	19.6733	15.3795	14.4767	10.006	7.58083	7.69304	FAD binding domain-containing protein (1515 nt)	5427	1515	58.75
TCONS_00000374	XLOC_000356	NA	MGG_06667	TSS364	=	MGG_06667T0	supercont8.1:2324251-2324419	168	3950.01	2474.01	3732.05	3736.4	4381.58	2471.93	2584.66	2365.43	hypothetical protein (168 nt)	168	168	52.98
TCONS_00000375	XLOC_000357	NA	MGG_06668	TSS365	=	MGG_06668T0	supercont8.1:2325305-2327863	1571	519.221	377.394	497.895	531.888	527.882	361.039	382.487	388.656	hypothetical protein (777 nt)	1571	777	62.03
TCONS_00000376	XLOC_000358	NA	MGG_06670	TSS366	=	MGG_06670T0	supercont8.1:2331705-2333292	1443	29.8727	43.9699	32.5542	28.6321	28.4319	47.0187	42.199	42.6921	charged multivesicular body protein 3 (705 nt)	1443	705	62.55
TCONS_00000377	XLOC_000359	NA	MGG_16152	TSS367	=	MGG_16152T0	supercont8.1:2335895-2336291	396	0.27734	0.227222	0.441015	0	0.391004	0	0.227418	0.454248	hypothetical protein (396 nt)	396	396	52.53
TCONS_00000378	XLOC_000360	NA	MGG_06672	TSS368	=	MGG_06672T0	supercont8.1:2338994-2341009	1913	85.5955	159.279	61.7218	99.2504	95.8143	117.111	181.018	179.706	hypothetical protein (516 nt)	1913	516	60.66
TCONS_00000379	XLOC_000361	NA	MGG_06673	TSS369	=	MGG_06673T0	supercont8.1:2347923-2355421	6852	17.7763	57.7012	17.7591	18.2733	17.2964	58.1357	57.9085	57.0593	hypothetical protein (4995 nt)	6852	4995	56.86
TCONS_00000380	XLOC_000362	NA	MGG_06674	TSS370	=	MGG_06674T0	supercont8.1:2355950-2359278	3310	1.08669	0.936889	1.26109	1.19266	0.806336	1.17788	0.897849	0.734942	hypothetical protein (717 nt)	3310	717	62.9
TCONS_00000381	XLOC_000363	NA	MGG_06676	TSS371	=	MGG_06676T0	supercont8.1:2359577-2361530	783	2.76522	3.4243	3.19675	3.49643	1.60248	4.12256	3.0383	3.11203	hypothetical protein (576 nt)	783	576	55.21
TCONS_00000382	XLOC_000364	NA	MGG_06678	TSS372	=	MGG_06678T0	supercont8.1:2362558-2365510	2741	16.6349	16.6103	17.8237	15.7411	16.3399	18.1247	14.7301	16.976	ribose-phosphate pyrophosphokinase 5 (1335 nt)	2741	1335	56.55
TCONS_00000383	XLOC_000365	NA	MGG_11879	TSS373	=	MGG_11879T0	supercont8.1:2371450-2375424	1517	33.5656	42.0399	30.4345	36.1185	34.1438	37.4187	45.0041	43.6967	hypothetical protein (1218 nt)	1517	1218	62.89
TCONS_00000384	XLOC_000366	NA	MGG_06681	TSS374	=	MGG_06681T0	supercont8.1:2377163-2382364	2105	14.5753	23.0667	14.3226	14.4027	15.0006	22.9795	23.6416	22.5789	arginine-tRNA-protein transferase 1 (1383 nt)	2105	1383	51.63
TCONS_00000385	XLOC_000367	NA	MGG_06683	TSS375	=	MGG_06683T0	supercont8.1:2382372-2385324	1900	5.05382	5.84617	4.80901	5.65642	4.69604	5.15242	6.10321	6.28289	hypothetical protein (1407 nt)	1900	1407	57
TCONS_00000386	XLOC_000368	NA	MGG_06685	TSS376	=	MGG_06685T0	supercont8.1:2385636-2389666	704	2347.06	715.821	2096.26	2480.49	2464.42	616.02	765.918	765.524	cytochrome c (327 nt)	704	327	57.8
TCONS_00000387	XLOC_000369	NA	MGG_06689	TSS377	=	MGG_06689T0	supercont8.1:2401717-2404317	2218	81.9148	68.615	86.8848	78.4628	80.3968	73.2518	66.7152	65.8779	hypothetical protein (885 nt)	2218	885	50.51
TCONS_00000388	XLOC_000370	NA	MGG_06690	TSS378	=	MGG_06690T0	supercont8.1:2404650-2406913	2176	13.7026	14.6562	13.509	14.2456	13.3534	15.6155	14.6256	13.7275	RNA polymerase TFIIH complex subunit Ssl1 (1551 nt)	2176	1551	57.38
TCONS_00000389	XLOC_000371	NA	MGG_06692	TSS379	=	MGG_06692T0	supercont8.1:2409526-2410318	792	52.4655	64.3399	42.0381	58.0131	57.3452	53.7694	68.675	70.5754	conserved hypothetical protein (792 nt)	792	792	53.66
TCONS_00000390	XLOC_000372	NA	MGG_06693	TSS380	=	MGG_06693T0	supercont8.1:2410859-2414866	1135	676.426	434.672	673.369	678.321	677.589	417.129	444.815	442.073	60S ribosomal protein L27-A (408 nt)	1135	408	56.62
TCONS_00000391	XLOC_000373	NA	MGG_06695	TSS381	=	MGG_06695T0	supercont8.1:2417511-2419930	2113	54.2835	77.9943	60.2642	50.4466	52.1397	87.3979	73.7603	72.8248	UDP-galactopyranose mutase (1536 nt)	2113	1536	55.08
TCONS_00000392	XLOC_000374	NA	MGG_06696	TSS382	=	MGG_06696T0	supercont8.1:2421001-2429982	8818	12.021	10.8383	12.9825	11.3479	11.7326	11.1996	10.6675	10.6477	ethylene receptor (7743 nt)	8818	7743	54.86
TCONS_00000394	XLOC_000376	NA	MGG_06699	TSS384	=	MGG_06699T0	supercont8.1:2435304-2439961	3377	34.1165	42.59	30.9343	35.6474	35.7677	37.7609	44.956	45.0532	hypothetical protein (1440 nt)	3377	1440	58.75
TCONS_00000395	XLOC_000377	NA	MGG_06703	TSS385	=	MGG_06703T0	supercont8.1:2459301-2465768	1452	64.8314	55.4666	74.1622	60.6906	59.6415	62.1092	53.2737	51.0168	hypothetical protein (732 nt)	1452	732	60.52
TCONS_00000396	XLOC_000378	NA	MGG_06706	TSS386	=	MGG_06706T0	supercont8.1:2468969-2472122	3153	33.9765	14.958	34.6194	32.575	34.735	15.4132	14.8799	14.5811	hypothetical protein (2772 nt)	3153	2772	52.67
TCONS_00000397	XLOC_000379	NA	MGG_16159	TSS387	=	MGG_16159T0	supercont8.1:2480917-2483879	1290	105.848	208.422	128.559	92.4862	96.4996	255.265	184.456	185.545	hypothetical protein (339 nt)	1290	339	52.8
TCONS_00000398	XLOC_000380	NA	MGG_06714	TSS388	=	MGG_06714T0	supercont8.1:2494024-2496539	1355	23.3081	31.1605	26.5197	22.8991	20.5056	33.9	29.2384	30.3431	hypothetical protein (825 nt)	1355	825	57.94
TCONS_00000399	XLOC_000381	NA	MGG_06716	TSS389	=	MGG_06716T0	supercont8.1:2496994-2497836	658	16.2022	16.8443	14.9051	16.9096	16.7918	17.1255	15.6275	17.7798	hypothetical protein (600 nt)	658	600	56.5
TCONS_00000400	XLOC_000382	NA	MGG_06717	TSS390	=	MGG_06717T0	supercont8.1:2498384-2499781	972	14.1479	19.1936	14.7652	13.3301	14.3485	18.4486	20.9347	18.1975	hypothetical protein (972 nt)	972	972	52.57
TCONS_00000401	XLOC_000383	NA	MGG_06720	TSS391	=	MGG_06720T0	supercont8.1:2505297-2507870	2015	576.416	593.194	645.991	542.578	540.678	668.514	548.925	562.141	ATP-citrate synthase subunit 2 (1461 nt)	2015	1461	56.74
TCONS_00000402	XLOC_000384	NA	MGG_06721	TSS392	=	MGG_06721T0	supercont8.1:2508337-2509584	961	706.802	406.168	742.244	701.678	676.482	425.561	398.801	394.143	60S ribosomal protein L28 (453 nt)	961	453	60.04
TCONS_00000403	XLOC_000385	NA	MGG_06722	TSS393	=	MGG_06722T0	supercont8.1:2511137-2513552	2041	120.887	74.6733	136.051	116.519	110.091	83.6795	71.8433	68.4971	1,3-beta-glucanosyltransferase gel2 (1458 nt)	2041	1458	55.69
TCONS_00000404	XLOC_000386	NA	MGG_06727	TSS394	=	MGG_06727T0	supercont8.1:2523203-2524407	1142	55.2272	46.0463	52.2674	60.0256	53.3885	43.5947	48.2469	46.2971	WD domain-containing protein (414 nt)	1142	414	54.11
TCONS_00000405	XLOC_000387	NA	MGG_06728	TSS395	=	MGG_06728T0	supercont8.1:2524666-2529237	2565	14.1414	17.4943	15.0722	13.5081	13.8441	18.5378	16.5008	17.4443	meiotic recombination protein rec14 (996 nt)	2565	996	64.36
TCONS_00000406	XLOC_000388	NA	MGG_06730	TSS396	=	MGG_06730T0	supercont8.1:2531018-2532069	749	62.5371	58.3178	65.8431	62.9462	58.8219	60.9331	55.148	58.8724	prefoldin subunit 4 (408 nt)	749	408	53.68
TCONS_00000407	XLOC_000389	NA	MGG_06731	TSS397	=	MGG_06731T0	supercont8.1:2540437-2543401	1231	44.1414	37.0143	39.5677	47.4655	45.3908	33.5897	39.8137	37.6395	hypothetical protein (579 nt)	1231	579	53.71
TCONS_00000408	XLOC_000390	NA	MGG_06733	TSS398	=	MGG_06733T0	supercont8.1:2543567-2548018	3154	17.9463	22.4934	18.271	18.3523	17.2158	22.3911	22.1109	22.9783	SUMO-activating enzyme subunit uba-2 (2055 nt)	3154	2055	52.31
TCONS_00000409	XLOC_000391	NA	MGG_06736	TSS399	=	MGG_06736T0	supercont8.1:2551504-2556768	4888	9.23335	10.565	10.7794	8.85931	8.06135	11.855	9.8974	9.94248	hypothetical protein (3798 nt)	4888	3798	54.84
TCONS_00000410	XLOC_000392	NA	MGG_06738	TSS400	=	MGG_06738T0	supercont8.1:2561413-2563217	1727	5.16051	7.83931	4.78544	5.46966	5.22643	7.64074	7.77952	8.09767	G-protein coupled receptor (1500 nt)	1727	1500	54.93
TCONS_00000411	XLOC_000393	NA	MGG_06740	TSS401	=	MGG_06740T0	supercont8.1:2572576-2574912	1764	0.236425	0.101522	0.206851	0.302301	0.200124	0.158644	0.0292159	0.116705	inner membrane protein yieG (1764 nt)	1764	1764	52.44
TCONS_00000412	XLOC_000394	NA	MGG_06742	TSS402	=	MGG_06742T0	supercont8.1:2576968-2580818	2951	33.1338	39.4034	37.2468	29.8574	32.2971	43.3186	36.4987	38.3929	hypothetical protein (2355 nt)	2951	2355	53.89
TCONS_00000413	XLOC_000395	NA	MGG_06743	TSS403	=	MGG_06743T0	supercont8.1:2581084-2584567	2312	49.0095	61.6073	53.4503	46.5628	47.0155	62.9406	61.1768	60.7045	vacuolar protein sorting-associated protein vps5 (1824 nt)	2312	1824	59.7
TCONS_00000414	XLOC_000396	NA	MGG_06745	TSS404	=	MGG_06745T0	supercont8.1:2584733-2586306	1466	5.77202	4.23729	6.41212	4.78931	6.11462	4.4583	4.76024	3.49332	hypothetical protein (954 nt)	1466	954	58.6
TCONS_00000415	XLOC_000397	NA	MGG_06747	TSS405	=	MGG_06747T0	supercont8.1:2588603-2590366	1399	26.2937	44.2086	26.3956	27.7089	24.7766	46.6497	43.1693	42.8068	glutathione S-transferase (960 nt)	1399	960	54.37
TCONS_00000416	XLOC_000398	NA	MGG_06748	TSS406	=	MGG_06748T0	supercont8.1:2590699-2593793	2639	21.2753	31.0352	21.5724	21.1849	21.0687	32.8372	29.9766	30.2918	branchpoint-bridging protein (1917 nt)	2639	1917	59.99
TCONS_00000417	XLOC_000399	NA	MGG_06749	TSS407	=	MGG_06749T0	supercont8.1:2594044-2595516	1424	3.27329	4.74877	3.53673	3.3449	2.93825	4.48153	5.1093	4.65547	hypothetical protein (1275 nt)	1424	1275	62.27
TCONS_00000418	XLOC_000400	NA	MGG_06751	TSS408	=	MGG_06751T0	supercont8.1:2600559-2602184	1528	89.4058	42.9327	102.632	82.0786	83.5067	47.5634	41.6413	39.5933	hypothetical protein (675 nt)	1528	675	60
TCONS_00000419	XLOC_000401	NA	MGG_06752	TSS409	=	MGG_06752T0	supercont8.1:2602787-2606080	3036	50.515	25.1378	58.2833	45.658	47.6038	30.1132	22.1092	23.1911	peptidase family M28 family protein (3036 nt)	3036	3036	55.3
TCONS_00000420	XLOC_000402	NA	MGG_06753	TSS410	=	MGG_06753T0	supercont8.1:2606308-2607477	1045	2.79286	1.0571	2.35147	3.34853	2.67858	1.01654	0.916475	1.23827	hypothetical protein (687 nt)	1045	687	59.83
TCONS_00000421	XLOC_000403	NA	MGG_16162	TSS411	=	MGG_16162T0	supercont8.1:2607648-2609036	318	0.415632	0.123613	0.607399	0	0.639498	0	0.370839	0	hypothetical protein (318 nt)	318	318	52.2
TCONS_00000422	XLOC_000404	NA	MGG_06755	TSS412	=	MGG_06755T0	supercont8.1:2609572-2613374	3364	16.8835	6.53365	17.6184	16.3877	16.6445	6.73308	6.46723	6.40065	hypothetical protein (1677 nt)	3364	1677	57.96
TCONS_00000423	XLOC_000405	NA	MGG_06758	TSS413	=	MGG_06758T0	supercont8.1:2617670-2619529	1782	45.1178	19.925	42.1361	46.4248	46.7924	19.8541	20.3926	19.5284	hypothetical protein (1404 nt)	1782	1404	55.06
TCONS_00000424	XLOC_000406	NA	MGG_06759	TSS414	=	MGG_06759T0	supercont8.1:2620247-2626811	2654	300.293	226.436	335.105	283.657	282.117	241.143	220.284	217.881	heat shock protein 90 (2109 nt)	2654	2109	55.67
TCONS_00000425	XLOC_000407	NA	MGG_16164	TSS415	=	MGG_16164T0	supercont8.1:2627476-2627839	291	0.548428	1.63429	0	0.825457	0.819825	2.05823	1.8972	0.947438	hypothetical protein (291 nt)	291	291	53.95
TCONS_00000426	XLOC_000408	NA	MGG_06763	TSS416	=	MGG_06763T0	supercont8.1:2636770-2640911	1939	7.18129	8.32176	7.45289	6.84439	7.24659	9.09999	7.70161	8.16367	DNA primase large subunit (1521 nt)	1939	1521	56.74
TCONS_00000427	XLOC_000409	NA	MGG_06765	TSS417	=	MGG_06765T0	supercont8.1:2641302-2644035	2578	102.489	37.2989	117.762	95.1687	94.5353	42.165	34.4761	35.2554	sterol O-acyltransferase 2 (1785 nt)	2578	1785	53.61
TCONS_00000429	XLOC_000411	NA	MGG_06768	TSS419	=	MGG_06768T0	supercont8.1:2657751-2661404	3441	38.1397	50.4908	33.6566	41.1298	39.6327	43.3765	54.3811	53.7147	hypothetical protein (1743 nt)	3441	1743	56.86
TCONS_00000431	XLOC_000413	NA	MGG_06769	TSS421	=	MGG_06769T0	supercont8.1:2671120-2673275	2155	234.292	47.4347	224.735	240.011	238.131	45.6523	49.3754	47.2763	hypothetical protein (267 nt)	2155	267	55.43
TCONS_00000433	XLOC_000415	NA	MGG_06773	TSS423	=	MGG_06773T0	supercont8.1:2686476-2689350	2633	1.4419	1.82287	1.06075	1.88053	1.38443	1.42843	1.91811	2.12208	hypothetical protein (2460 nt)	2633	2460	63.78
TCONS_00000434	XLOC_000416	NA	MGG_06775	TSS424	=	MGG_06775T0	supercont8.1:2690100-2692299	2044	16.8961	22.4083	19.1168	16.2033	15.3682	25.7734	21.0246	20.4267	hypothetical protein (1542 nt)	2044	1542	55.19
TCONS_00000435	XLOC_000417	NA	MGG_11862	TSS425	=	MGG_11862T0	supercont8.1:2692970-2695568	2389	97.2679	113.282	115.429	86.0017	90.3726	131.719	104.395	103.732	ABC transporter ATP-binding protein ARB1 (1911 nt)	2389	1911	56.99
TCONS_00000436	XLOC_000418	NA	INO80	TSS426	=	MGG_06776T0	supercont8.1:2696642-2704726	7462	14.1829	14.5912	13.2388	14.9991	14.3108	13.8282	14.8	15.117	DNA helicase INO80 (5835 nt)	7462	5835	54.81
TCONS_00000437	XLOC_000419	NA	MGG_11861	TSS427	=	MGG_11861T0	supercont8.1:2707511-2709952	2362	1076.04	434.992	1082.35	1077.46	1068.32	439.438	433.211	432.328	1,3-beta-glucanosyltransferase gel4 (1587 nt)	2362	1587	58.73
TCONS_00000438	XLOC_000420	NA	MGG_06780	TSS428	=	MGG_06780T0	supercont8.1:2719456-2723925	2416	5.23437	6.68859	5.24083	5.19631	5.26596	6.67802	6.95627	6.43149	alpha-L-fucosidase 1 (1560 nt)	2416	1560	61.67
TCONS_00000439	XLOC_000421	NA	MGG_06782	TSS429	=	MGG_06782T0	supercont8.1:2725151-2728181	2283	17.727	11.9998	19.7946	16.582	16.8043	13.18	11.8783	10.9413	N amino acid transport system protein (1599 nt)	2283	1599	52.03
TCONS_00000440	XLOC_000422	NA	MGG_06784	TSS430	=	MGG_06784T0	supercont8.1:2736543-2738736	1540	6.96149	30.8701	6.94055	7.58212	6.36178	32.0909	31.2848	29.2345	aldo-keto reductase (1005 nt)	1540	1005	55.02
TCONS_00000441	XLOC_000423	NA	MGG_06785	TSS431	=	MGG_06785T0	supercont8.1:2740911-2743886	1141	9.79039	13.8738	9.63151	10.1959	9.54374	13.6892	13.4188	14.5134	exosome complex exonuclease RRP41 (843 nt)	1141	843	66.31
TCONS_00000442	XLOC_000424	NA	MGG_06787	TSS432	=	MGG_06787T0	supercont8.1:2744055-2747329	3148	31.9988	16.7866	31.4151	32.8443	31.7371	16.1159	17.7774	16.4664	hypothetical protein (1266 nt)	3148	1266	56.4
TCONS_00000443	XLOC_000425	NA	MGG_06788	TSS433	=	MGG_06788T0	supercont8.1:2747463-2749388	1854	7.65383	8.1226	8.90815	6.81393	7.2394	9.29082	7.79211	7.28486	hypothetical protein (1854 nt)	1854	1854	63.59
TCONS_00000444	XLOC_000426	NA	MGG_06789	TSS434	=	MGG_06789T0	supercont8.1:2749656-2753612	3745	3.72567	4.70989	3.78987	3.49578	3.89138	5.14629	4.67545	4.30795	hypothetical protein (1899 nt)	3745	1899	64.56
TCONS_00000445	XLOC_000427	NA	MGG_06794	TSS435	=	MGG_06794T0	supercont8.1:2772168-2774220	1815	0.216837	0.662023	0.212019	0.34158	0.0969113	0.713684	0.565931	0.706455	puromycin resistance protein pur8 (1815 nt)	1815	1815	60.44
TCONS_00000446	XLOC_000428	NA	MGG_06795	TSS436	=	MGG_06795T0	supercont8.1:2776216-2777683	1467	15.8753	22.2881	12.9389	18.0856	16.6014	18.3243	23.4222	25.1178	hypothetical protein (1233 nt)	1467	1233	59.77
TCONS_00000447	XLOC_000429	NA	MGG_06797	TSS437	=	MGG_06797T0	supercont8.1:2780823-2782960	2042	0.378209	0.773313	0.408542	0.513588	0.212497	0.782172	0.744602	0.793165	hypothetical protein (1725 nt)	2042	1725	61.51
TCONS_00000448	XLOC_000430	NA	MGG_06798	TSS438	=	MGG_06798T0	supercont8.1:2783562-2785083	1323	0.276084	0.67793	0.198949	0.420515	0.208787	0.572152	0.650105	0.811533	hypothetical protein (1323 nt)	1323	1323	68.33
TCONS_00000450	XLOC_000432	NA	MGG_06799	TSS440	=	MGG_06799T0	supercont8.1:2788040-2791009	2969	25.0459	76.434	26.0681	24.905	24.1646	77.0851	76.4574	75.7594	hypothetical protein (2388 nt)	2969	2388	57.75
TCONS_00000451	XLOC_000433	NA	MGG_06800	TSS441	=	MGG_06800T0	supercont8.1:2791430-2792395	897	0	0.379623	0	0	0	0.356383	0.261062	0.521423	hypothetical protein (534 nt)	897	534	58.05
TCONS_00000452	XLOC_000434	NA	MGG_16167	TSS442	=	MGG_16167T0	supercont8.1:2795298-2796906	1608	0.166583	0.0108133	0.0533482	0.279735	0.166667	0	0.03244	0	hypothetical protein (1608 nt)	1608	1608	53.54
TCONS_00000456	XLOC_000438	NA	MGG_14588	TSS446	=	MGG_14588T0	supercont8.1:2830472-2834398	1830	0	0.10438	0	0	0	0.0609218	0.168222	0.0839972	mitochondrial chaperone bcs1 (1830 nt)	1830	1830	51.86
TCONS_00000457	XLOC_000439	NA	MGG_16176	TSS447	=	MGG_16176T0	supercont8.1:2850869-2851590	629	6.03276	4.40929	8.83912	4.37338	4.88578	5.74106	4.3258	3.16101	hypothetical protein (357 nt)	629	357	59.1
TCONS_00000458	XLOC_000440	NA	MGG_16177	TSS448	=	MGG_16177T0	supercont8.1:2852117-2853717	1416	0	0.0307222	0	0	0	0.0171912	0	0.0749753	hypothetical protein (1416 nt)	1416	1416	52.4
TCONS_00000461	XLOC_000443	NA	MGG_16179	TSS451	=	MGG_16179T0	supercont8.1:2880967-2881517	440	45.387	37.3439	43.1638	45.2121	47.7849	44.1654	34.2122	33.6542	hypothetical protein (339 nt)	440	339	49.26
TCONS_00000462	XLOC_000443	NA	MGG_16179	TSS451	=	MGG_16179T1	supercont8.1:2880967-2881517	436	0	0.947239	0	0	0	1.09098	1.46826	0.282469	hypothetical protein, variant (267 nt)	436	267	49.81
TCONS_00000463	XLOC_000444	NA	MGG_06821	TSS452	=	MGG_06821T0	supercont8.1:2888934-2895829	1995	4.58219	6.72337	4.99395	4.39167	4.36094	7.67477	5.57747	6.91788	mitochondrial carrier protein (1383 nt)	1995	1383	68.91
TCONS_00000464	XLOC_000445	NA	MGG_16182	TSS453	=	MGG_16182T0	supercont8.1:2897749-2898300	551	0.939114	2.29196	0.607924	0.444357	1.76506	1.99248	2.82881	2.05459	hypothetical protein (336 nt)	551	336	53.87
TCONS_00000465	XLOC_000446	NA	MGG_06824	TSS454	=	MGG_06824T0	supercont8.1:2902159-2902871	712	0.450405	0.345195	0.283728	0.611821	0.455666	0.238745	0.442952	0.353888	hypothetical protein (627 nt)	712	627	71.93
TCONS_00000466	XLOC_000447	NA	MGG_06825	TSS455	=	MGG_06825T0	supercont8.1:2903786-2904932	1146	0.303083	0.670727	0.329058	0.332535	0.247658	0.663546	0.867397	0.481237	hypothetical protein (1146 nt)	1146	1146	53.49
TCONS_00000467	XLOC_000448	NA	MGG_06826	TSS456	=	MGG_06826T0	supercont8.1:2905246-2906145	775	2.64198	3.35974	3.31057	1.77234	2.84303	3.36975	3.94892	2.76054	hypothetical protein (750 nt)	775	750	55.07
TCONS_00000468	XLOC_000449	NA	MGG_06827	TSS457	=	MGG_06827T0	supercont8.1:2906666-2909888	2955	7.69563	9.26699	7.9875	7.84734	7.25204	9.8395	8.93703	9.02443	hypothetical protein (2955 nt)	2955	2955	52.18
TCONS_00000469	XLOC_000450	NA	MGG_06828	TSS458	=	MGG_06828T0	supercont8.1:2912809-2914627	1491	1.68548	12.304	2.38189	1.34197	1.33259	14.7162	11.2114	10.9843	hypothetical protein (1491 nt)	1491	1491	60.3
TCONS_00000470	XLOC_000451	NA	MGG_11819	TSS459	=	MGG_11819T0	supercont8.1:2923132-2923480	348	0	0.504026	0	0	0	0.617089	0.596912	0.298076	hypothetical protein (348 nt)	348	348	63.22
TCONS_00000472	XLOC_000453	NA	SLX4	TSS461	=	MGG_16183T0	supercont8.1:2937121-2939989	2868	7.5263	4.05652	6.63625	8.01406	7.92858	3.61656	4.21942	4.33359	structure-specific endonuclease subunit SLX4 (2868 nt)	2868	2868	52.27
TCONS_00000473	XLOC_000454	NA	MGG_16184	TSS462	=	MGG_16184T0	supercont8.1:2940667-2941777	975	2.32614	6.28481	1.52169	3.04095	2.41577	6.17489	5.81569	6.86385	hypothetical protein (975 nt)	975	975	59.08
TCONS_00000474	XLOC_000455	NA	MGG_06839	TSS463	=	MGG_06839T0	supercont8.1:2942612-2946052	3231	6.48296	8.82602	6.60077	7.212	5.63612	8.06649	9.16677	9.2448	kinesin (3231 nt)	3231	3231	56.76
TCONS_00000475	XLOC_000456	NA	MGG_16185	TSS464	=	MGG_16185T0	supercont8.1:2946564-2947213	443	5.92799	3.17982	6.66207	4.7855	6.33641	4.74689	2.76647	2.02609	hypothetical protein (264 nt) Note(s): Partial: End of the Contig	443	264	49.62
TCONS_00000476	XLOC_000457	NA	MGG_06842	TSS465	=	MGG_06842T0	supercont8.1:2955959-2959105	3054	0	0.0195567	0	0	0	0.0266188	0.0160365	0.0160147	hypothetical protein (3054 nt)	3054	3054	64.8
TCONS_00000478	XLOC_000459	NA	MGG_06847	TSS467	=	MGG_06847T0	supercont8.1:2969971-2972091	1955	80.0874	59.8367	71.1619	85.608	83.4924	53.0365	62.746	63.7274	annexin A7 (1311 nt)	1955	1311	57.97
TCONS_00000479	XLOC_000460	NA	MGG_06848	TSS468	=	MGG_06848T0	supercont8.1:2972448-2976225	3632	10.9189	11.1806	11.3725	11.0161	10.368	11.1464	10.6588	11.7367	hypothetical protein (2247 nt)	3632	2247	55.81
TCONS_00000480	XLOC_000461	NA	MGG_06849	TSS469	=	MGG_06849T0	supercont8.1:2976722-2978691	1826	13.5252	15.2443	11.9366	14.1042	14.5349	13.9952	15.683	16.0547	amidohydrolase 3 (1800 nt)	1826	1800	62.5
TCONS_00000481	XLOC_000462	NA	MGG_06850	TSS470	=	MGG_06850T0	supercont8.1:2979574-2984383	3627	34.95	45.0352	29.6882	37.3114	37.8505	37.5405	48.4418	49.1231	hypothetical protein (2241 nt)	3627	2241	58.72
TCONS_00000482	XLOC_000463	NA	MGG_16190	TSS471	=	MGG_16190T0	supercont8.1:2989105-2990948	1018	1.2401	0.598204	1.61489	0.960673	1.14475	0.681361	0.89084	0.22241	hypothetical protein (405 nt)	1018	405	50.12
TCONS_00000483	XLOC_000464	NA	MGG_06852	TSS472	=	MGG_06852T0	supercont8.1:2991739-2993241	1339	5.66853	4.93433	6.2643	5.1829	5.55839	5.55517	4.16661	5.0812	histone-lysine N-methyltransferase (996 nt)	1339	996	53.11
TCONS_00000484	XLOC_000465	NA	MGG_06853	TSS473	=	MGG_06853T0	supercont8.1:2994594-2999678	2088	55.9762	58.1921	54.8748	55.5811	57.4727	54.541	59.9858	60.0496	hypothetical protein (984 nt)	2088	984	61.08
TCONS_00000485	XLOC_000466	NA	MGG_06857	TSS474	=	MGG_06857T0	supercont8.1:3002646-3005031	1994	7.33143	9.26984	7.54354	7.38211	7.06864	10.0094	9.12257	8.6776	tRNA guanosine-2'-O-methyltransferase TRM11 (1380 nt)	1994	1380	61.23
TCONS_00000486	XLOC_000467	NA	MGG_16192	TSS475	=	MGG_16192T0	supercont8.1:3008138-3010413	936	2.90389	3.62436	3.3937	2.88095	2.437	3.58139	3.83367	3.45802	hypothetical protein (474 nt)	936	474	54.22
TCONS_00000487	XLOC_000468	NA	MGG_06860	TSS476	=	MGG_06860T0	supercont8.1:3010679-3014470	3565	108.468	104.4	124.134	101.234	100.036	114.806	99.0059	99.3876	coatomer subunit beta (2877 nt)	3565	2877	53.18
TCONS_00000489	XLOC_000470	NA	MGG_11813	TSS478	=	MGG_11813T0	supercont8.1:3030906-3032124	1044	10.2811	17.0194	9.68316	10.8956	10.2646	12.9778	19.5385	18.542	hypothetical protein (1044 nt)	1044	1044	58.43
TCONS_00000490	XLOC_000471	NA	MGG_16194	TSS479	=	MGG_16194T0	supercont8.1:3033510-3034977	887	42.3249	9.61327	46.7028	40.2196	40.0522	9.12254	10.3284	9.38887	hypothetical protein (342 nt)	887	342	51.17
TCONS_00000491	XLOC_000472	NA	MGG_06868	TSS480	=	MGG_06868T0	supercont8.1:3036289-3039361	2646	179.325	82.2252	205.977	163.577	168.42	92.7418	77.3463	76.5875	acetolactate synthase catalytic subunit (2049 nt)	2646	2049	56.37
TCONS_00000492	XLOC_000473	NA	MGG_16195	TSS481	=	MGG_16195T0	supercont8.1:3050399-3056384	3120	440.792	41.1076	418.47	455.655	448.251	40.1193	42.4001	40.8033	hypothetical protein (1458 nt)	3120	1458	59.33
TCONS_00000494	XLOC_000473	NA	MGG_16196	TSS482	=	MGG_16196T0	supercont8.1:3050399-3056384	2549	7.97418	12.824	0	11.5516	12.371	13.2082	12.932	12.3318	hypothetical protein (1746 nt)	2549	1746	63
TCONS_00000495	XLOC_000474	NA	MGG_16197	TSS483	=	MGG_16197T0	supercont8.1:3057841-3058882	921	2.23712	0.998011	2.15475	2.06924	2.48737	1.29125	0.820428	0.882351	hypothetical protein (450 nt)	921	450	50.67
TCONS_00000496	XLOC_000475	NA	MGG_11809	TSS484	=	MGG_11809T0	supercont8.1:3059976-3063200	3137	14.3296	6.24602	14.9004	14.455	13.6334	6.35709	6.17133	6.20964	hypothetical protein (2223 nt)	3137	2223	59.56
TCONS_00000497	XLOC_000476	NA	MGG_06871	TSS485	=	MGG_06871T0	supercont8.1:3063894-3069829	2230	27.588	40.5275	31.6778	24.3167	26.7695	44.4996	38.6127	38.4703	hypothetical protein (1032 nt)	2230	1032	61.14
TCONS_00000498	XLOC_000477	NA	MGG_16199	TSS486	=	MGG_16199T0	supercont8.1:3084533-3084829	261	0	0.227215	0	0	0	0	0.681644	0	hypothetical protein (261 nt)	261	261	51.72
TCONS_00000499	XLOC_000478	NA	MGG_06875	TSS487	=	MGG_06875T0	supercont8.1:3088054-3090279	642	606.469	336.946	646.507	579.949	592.95	344.991	332.634	333.214	hypothetical protein (318 nt)	642	318	53.77
TCONS_00000500	XLOC_000479	NA	MGG_06877	TSS488	=	MGG_06877T0	supercont8.1:3090404-3093234	2256	14.97	13.9447	16.6651	14.1912	14.0537	14.6039	13.6576	13.5725	hypothetical protein (1224 nt)	2256	1224	56.7
TCONS_00000501	XLOC_000480	NA	MGG_06878	TSS489	=	MGG_06878T0	supercont8.1:3093533-3097161	3234	29.7941	22.3618	33.9193	27.2069	28.2561	24.8402	21.4233	20.8217	ATP-dependent permease MDL2 (2475 nt)	3234	2475	57.17
TCONS_00000502	XLOC_000481	NA	MGG_11805	TSS490	=	MGG_11805T0	supercont8.1:3098740-3100596	1533	35.5805	30.4396	37.9751	34.2095	34.5568	33.3965	27.4745	30.4479	lysine-sensitive aspartokinase 3 (1533 nt)	1533	1533	54.66
TCONS_00000503	XLOC_000482	NA	MGG_11804	TSS491	=	MGG_11804T0	supercont8.1:3101129-3102498	1040	161.858	107.351	202.925	147.74	134.908	132.488	94.5212	95.0438	hypothetical protein (615 nt)	1040	615	58.54
TCONS_00000504	XLOC_000483	NA	MGG_06880	TSS492	=	MGG_06880T0	supercont8.1:3102673-3108534	1681	13.7284	27.4007	12.4564	13.8847	14.8441	26.129	28.2251	27.848	phytanoyl-CoA dioxygenase (972 nt)	1681	972	64.2
TCONS_00000505	XLOC_000484	NA	MGG_06882	TSS493	=	MGG_06882T0	supercont8.1:3108799-3113536	2972	14.6436	12.9177	13.7217	15.2286	14.9806	12.6022	13.3565	12.7943	hypothetical protein (2574 nt)	2972	2574	51.36
TCONS_00000506	XLOC_000485	NA	CMD1	TSS494	=	MGG_16201T0	supercont8.1:3114382-3119074	1124	1036.32	578.177	1204.7	960.387	943.871	658.43	542.564	533.538	hypothetical protein (450 nt)	1124	450	54.44
TCONS_00000508	XLOC_000485	NA	MGG_16202	TSS495	=	MGG_16202T0	supercont8.1:3114382-3119074	3026	5.12424	6.56355	5.13678	4.69078	5.54516	7.34908	6.12771	6.21386	hypothetical protein (1800 nt)	3026	1800	56.94
TCONS_00000509	XLOC_000486	NA	MGG_11801	TSS496	=	MGG_11801T0	supercont8.1:3119183-3122771	3189	27.0025	31.3421	27.4139	27.2198	26.3738	29.8596	32.4801	31.6866	AP-1 complex subunit gamma-1 (2538 nt)	3189	2538	54.93
TCONS_00000510	XLOC_000487	NA	MGG_06887	TSS497	=	MGG_06887T0	supercont8.1:3128169-3130663	1974	18.0942	22.4251	19.5723	16.7076	18.0027	22.3398	22.5989	22.3367	hypothetical protein (1395 nt)	1974	1395	59.28
TCONS_00000511	XLOC_000488	NA	MGG_06892	TSS498	=	MGG_06892T0	supercont8.1:3141518-3144244	2598	34.6538	45.1377	28.4435	36.8098	38.7079	37.1664	49.5095	48.7373	WD repeat-containing protein srw1 (1815 nt)	2598	1815	54.44
TCONS_00000512	XLOC_000489	NA	MGG_16203	TSS499	=	MGG_16203T0	supercont8.1:3147744-3152285	4266	13.1958	16.5937	12.4053	13.3002	13.8818	16.219	16.0384	17.5238	SMC1A protein (3780 nt)	4266	3780	51.85
TCONS_00000513	XLOC_000490	NA	MGG_16204	TSS500	=	MGG_16204T0	supercont8.1:3152576-3153669	789	655.621	390.876	727.189	624.329	615.346	419.446	378.808	374.373	60S ribosomal protein L12 (498 nt)	789	498	57.43
TCONS_00000514	XLOC_000491	NA	MGG_06896	TSS501	=	MGG_06896T0	supercont8.1:3156556-3162910	6168	15.3096	18.2257	15.9229	15.8535	14.1524	18.705	17.8947	18.0774	UDP-N-acetylglucosaminyltransferase (4626 nt)	6168	4626	54.22
TCONS_00000515	XLOC_000492	NA	MGG_16205	TSS502	=	MGG_16205T0	supercont8.1:3167311-3167873	462	0.374997	0.316594	0.536488	0	0.588504	0.607327	0.171339	0.171114	hypothetical protein (249 nt)	462	249	62.25
TCONS_00000516	XLOC_000493	NA	MGG_06898	TSS503	=	MGG_06898T0	supercont8.1:3175801-3178305	2428	11.0203	6.6046	10.2407	10.974	11.8462	5.61576	7.35005	6.848	MYB-1 (1188 nt)	2428	1188	56.99
TCONS_00000517	XLOC_000494	NA	MGG_16209	TSS504	=	MGG_16209T0	supercont8.1:3184936-3186396	396	0.556161	0.378834	0.886477	0	0.782008	0	0.682254	0.454248	hypothetical protein (396 nt)	396	396	54.04
TCONS_00000519	XLOC_000496	NA	MGG_06903	TSS506	=	MGG_06903T0	supercont8.1:3200146-3201705	1480	23.0943	33.2826	24.9001	21.9015	22.4814	34.9375	32.2454	32.6649	hypothetical protein (858 nt)	1480	858	53.26
TCONS_00000520	XLOC_000497	NA	MGG_06904	TSS507	=	MGG_06904T0	supercont8.1:3202291-3204407	2016	74.3326	82.94	74.9398	72.1478	75.9103	82.1032	83.3521	83.3648	hypothetical protein (2016 nt)	2016	2016	57.89
TCONS_00000521	XLOC_000498	NA	MGG_06906	TSS508	=	MGG_06906T0	supercont8.1:3211947-3214766	2819	18.3183	22.8251	20.9442	16.9299	17.0806	25.4176	21.6832	21.3745	hypothetical protein (1704 nt)	2819	1704	55.28
TCONS_00000522	XLOC_000499	NA	MGG_06907	TSS509	=	MGG_06907T0	supercont8.1:3214891-3218321	915	70.6357	108.689	70.3976	73.0271	68.4823	111.307	112.953	101.807	hypothetical protein (456 nt)	915	456	60.31
TCONS_00000523	XLOC_000500	NA	MGG_06909	TSS510	=	MGG_06909T0	supercont8.1:3218488-3220523	2035	35.708	28.8974	31.8051	39.6968	35.6221	25.9426	29.997	30.7525	hypothetical protein (1257 nt)	2035	1257	62.45
TCONS_00000524	XLOC_000501	NA	MGG_06911	TSS511	=	MGG_06911T0	supercont8.1:3224142-3228810	1483	51.6925	51.7793	46.3889	54.8103	53.8784	48.3288	54.4832	52.526	rdgB/HAM1 family non-canonical purine NTP pyrophosphatase (570 nt)	1483	570	55.61
TCONS_00000525	XLOC_000502	NA	MGG_06915	TSS512	=	MGG_06915T0	supercont8.1:3238454-3240867	1273	174.818	199.238	190.233	170.729	163.491	211.214	195.229	191.271	uracil phosphoribosyltransferase (732 nt)	1273	732	56.28
TCONS_00000526	XLOC_000503	NA	MGG_06917	TSS513	=	MGG_06917T0	supercont8.1:3241832-3245290	2296	103.014	261.515	108.874	99.5913	100.575	269.109	255.364	260.073	GTP cyclohydrolase II (1542 nt)	2296	1542	53.76
TCONS_00000527	XLOC_000504	NA	MGG_06918	TSS514	=	MGG_06918T0	supercont8.1:3247167-3250709	1544	201.924	214.487	177.436	214.014	214.321	186.153	226.363	230.943	hypothetical protein (423 nt)	1544	423	54.85
TCONS_00000528	XLOC_000505	NA	RPS1	TSS515	=	MGG_06919T0	supercont8.1:3252910-3254087	771	2063.71	1154.22	1766.67	2219.29	2205.16	970.088	1238.06	1254.51	40S ribosomal protein S3aE (771 nt)	771	771	57.59
TCONS_00000529	XLOC_000506	NA	MGG_06920	TSS516	=	MGG_06920T0	supercont8.1:3254399-3268024	2710	21.8204	39.3592	20.5421	23.3841	21.535	36.7026	40.4692	40.9058	rab protein (636 nt)	2710	636	52.83
TCONS_00000531	XLOC_000508	NA	MGG_06925	TSS518	=	MGG_06925T0	supercont8.1:3276759-3281715	4611	26.512	18.9175	30.9913	23.4302	25.1146	22.0543	17.7656	16.9326	hypothetical protein (4011 nt)	4611	4011	52.16
TCONS_00000532	XLOC_000509	NA	MGG_06926	TSS519	=	MGG_06926T0	supercont8.1:3281770-3284211	1577	21.0096	20.3303	22.678	19.2772	21.0736	23.3397	17.8772	19.7741	cyclopropane-fatty-acyl-phospholipid synthase (1056 nt)	1577	1056	56.72
TCONS_00000533	XLOC_000510	NA	MGG_06928	TSS520	=	MGG_06928T0	supercont8.1:3284299-3289084	2953	16.2844	21.9049	16.6619	16.6805	15.5107	21.9575	22.1925	21.5648	CMGC/CDK protein kinase (1668 nt)	2953	1668	54.92
TCONS_00000534	XLOC_000511	NA	MGG_06930	TSS521	=	MGG_06930T0	supercont8.1:3289437-3293662	2362	30.1141	41.8919	23.8638	32.4291	34.0494	33.3706	46.7124	45.5927	hypothetical protein (1440 nt)	2362	1440	57.57
TCONS_00000535	XLOC_000512	NA	MGG_06933	TSS522	=	MGG_06933T0	supercont8.1:3297659-3299553	1394	345.502	183.777	413.483	314.772	308.25	213.402	171.829	166.1	calcineurin subunit B (525 nt)	1394	525	50.86
TCONS_00000536	XLOC_000513	NA	MGG_06936	TSS523	=	MGG_06936T0	supercont8.1:3313944-3315549	1239	295.46	284.535	297.448	299.573	289.357	290.943	279.898	282.764	elongation factor 1-gamma (1239 nt)	1239	1239	57.71
TCONS_00000537	XLOC_000514	NA	RRP36	TSS524	=	MGG_06938T0	supercont8.1:3318322-3322253	1588	9.86858	12.4106	11.1154	8.96657	9.52373	12.799	12.6028	11.83	rRNA biogenesis protein RRP36 (951 nt)	1588	951	59.62
TCONS_00000538	XLOC_000515	NA	MGG_06941	TSS525	=	MGG_06941T0	supercont8.1:3324576-3327581	2084	70.1218	59.2233	78.1417	64.947	67.2766	64.2426	57.4918	55.9355	serine/threonine-protein phosphatase 5 (1437 nt)	2084	1437	53.17
TCONS_00000539	XLOC_000516	NA	MGG_06943	TSS526	=	MGG_06943T0	supercont8.1:3327982-3330147	639	187.222	173.447	212.361	174.021	175.285	199.288	163.262	157.792	transcription elongation factor spt-4 (369 nt)	639	369	57.18
TCONS_00000540	XLOC_000517	NA	MGG_06945	TSS527	=	MGG_06945T0	supercont8.1:3330281-3334097	3682	6.70816	8.07179	7.8351	6.30181	5.98756	8.13257	7.66581	8.41699	helicase (3312 nt)	3682	3312	52.11
TCONS_00000542	XLOC_000519	NA	MGG_16219	TSS529	=	MGG_16219T0	supercont8.1:3336919-3343267	2535	19.9935	29.9387	20.178	19.4746	20.3279	29.8993	29.7812	30.1355	hypothetical protein (1485 nt)	2535	1485	55.96
TCONS_00000544	XLOC_000519	NA	MGG_16220	TSS530	=	MGG_16220T0	supercont8.1:3336919-3343267	2106	16.1089	27.5425	13.5477	16.0896	18.6895	25.8895	27.7392	28.9988	hypothetical protein (1530 nt)	2106	1530	62.35
TCONS_00000545	XLOC_000520	NA	MGG_16221	TSS531	=	MGG_16221T0	supercont8.1:3343459-3348326	2113	8.05	4.90831	8.9964	7.41859	7.735	5.53719	4.35973	4.82801	methionyl-tRNA synthetase (1767 nt)	2113	1767	53.99
TCONS_00000547	XLOC_000520	NA	MGG_16222	TSS532	=	MGG_16222T0	supercont8.1:3343459-3348326	989	16.3615	21.2082	15.7392	17.3264	16.0188	22.2006	20.9309	20.4931	hypothetical protein (714 nt)	989	714	52.1
TCONS_00000548	XLOC_000521	NA	MGG_06952	TSS533	=	MGG_06952T0	supercont8.1:3353202-3354215	675	880.573	513.785	990.414	829.361	821.943	563.77	487.45	490.134	ribosomal protein L38e (246 nt)	675	246	54.07
TCONS_00000549	XLOC_000522	NA	MGG_16224	TSS534	=	MGG_16224T0	supercont8.1:3358078-3358556	274	0.332229	0.393129	0	0	0.996686	0.605013	0.574373	0	hypothetical protein (150 nt)	274	150	52.67
TCONS_00000550	XLOC_000523	NA	MGG_06955	TSS535	=	MGG_06955T0	supercont8.1:3365567-3368135	2458	18.9576	33.4309	19.0322	19.5611	18.2795	35.7109	32.414	32.1677	hypothetical protein (1638 nt)	2458	1638	60.13
TCONS_00000552	XLOC_000524	NA	MGG_06958	TSS537	=	MGG_06958T0	supercont8.1:3373575-3376070	2365	2044.4	623.309	2204.21	1961.27	1967.72	663.224	605.345	601.359	hsp70-like protein (1956 nt)	2365	1956	57.87
TCONS_00000553	XLOC_000525	NA	MGG_06960	TSS538	=	MGG_06960T0	supercont8.1:3378836-3381530	2469	7.39546	10.2151	7.39088	8.02992	6.76556	9.38992	10.7255	10.5298	hypothetical protein (2031 nt)	2469	2031	58.1
TCONS_00000554	XLOC_000526	NA	MGG_06962	TSS539	=	MGG_06962T0	supercont8.1:3384949-3386929	1388	418.425	597.756	462.653	398.725	393.896	657.298	566.718	569.252	GTP-binding protein ypt1 (609 nt)	1388	609	54.52
TCONS_00000555	XLOC_000527	NA	YME2	TSS540	=	MGG_06965T0	supercont8.1:3394493-3401150	3149	18.8898	17.4886	19.92	19.1058	17.6435	18.5604	16.747	17.1583	mitochondrial escape protein 2 (2706 nt)	3149	2706	54.92
TCONS_00000556	XLOC_000528	NA	MGG_06969	TSS541	=	MGG_06969T0	supercont8.1:3407533-3410460	2859	14.5339	20.0641	16.2194	14.0646	13.3179	21.6839	20.0669	18.4413	minichromosome loss protein 1 (2565 nt)	2859	2565	55.87
TCONS_00000558	XLOC_000530	NA	MGG_16228	TSS543	=	MGG_16228T0	supercont8.1:3415742-3421864	1613	2.19205	1.55505	2.61567	0.923876	3.03661	1.48591	1.5115	1.66775	hypothetical protein (378 nt)	1613	378	52.91
TCONS_00000560	XLOC_000530	NA	MGG_16228	TSS544	=	MGG_16228T1	supercont8.1:3415742-3421864	1562	1.10826	0.234614	0.00238872	2.28024	1.04216	0.029512	0.00809508	0.666235	hypothetical protein, variant (378 nt)	1562	378	52.91
TCONS_00000561	XLOC_000530	NA	MGG_06971	TSS545	=	MGG_06971T0	supercont8.1:3415742-3421864	3756	39.2079	40.8778	31.2603	44.5721	41.7913	32.1993	45.6315	44.8027	flocculation suppression protein (1803 nt)	3756	1803	56.52
TCONS_00000562	XLOC_000531	NA	MGG_11786	TSS546	=	MGG_11786T0	supercont8.1:3433255-3436070	2262	84.9311	37.4501	97.3759	77.2512	80.1662	45.0603	33.5793	33.7109	hypothetical protein (1767 nt)	2262	1767	57.1
TCONS_00000563	XLOC_000532	NA	MGG_06976	TSS547	=	MGG_06976T0	supercont8.1:3441528-3442899	684	0.0535302	0.433229	0	0	0.160591	0.457156	0.561938	0.280594	hypothetical protein (684 nt)	684	684	55.7
TCONS_00000564	XLOC_000533	NA	MGG_16230	TSS548	=	MGG_16230T0	supercont8.1:3443335-3447269	1910	185.491	155.01	199.382	177.761	179.331	168.852	149.226	146.952	succinyl-CoA ligase subunit beta (1341 nt)	1910	1341	58.31
TCONS_00000566	XLOC_000533	NA	MGG_16231	TSS549	=	MGG_16231T0	supercont8.1:3443335-3447269	1774	7.93795	10.2988	5.42223	8.49852	9.8931	9.68522	10.9799	10.2313	hypothetical protein (972 nt)	1774	972	57.1
TCONS_00000567	XLOC_000534	NA	SEY1	TSS550	=	MGG_06979T0	supercont8.1:3447510-3450808	3010	90.285	55.7904	92.5	89.1831	89.172	58.2734	54.1872	54.9106	SEY1 (2547 nt)	3010	2547	57.52
TCONS_00000569	XLOC_000535	NA	MGG_06981	TSS551	=	MGG_06981T0	supercont8.1:3456037-3467097	3521	0.223105	0.872484	0.0012951	0	0.668021	1.20631	0.821536	0.589601	carnitine O-acetyltransferase (2496 nt)	3521	2496	57.89
TCONS_00000570	XLOC_000535	NA	MGG_06981	TSS551	=	MGG_06981T1	supercont8.1:3456037-3467097	3381	1.88417	3.06344	2.24128	1.39658	2.01464	3.63188	2.66127	2.89717	carnitine O-acetyltransferase, variant 1 (2496 nt)	3381	2496	57.89
TCONS_00000571	XLOC_000535	NA	MGG_06981	TSS551	=	MGG_06981T2	supercont8.1:3456037-3467097	3278	3.24471	3.34193	2.5862	4.47939	2.66854	2.56448	3.78446	3.67686	carnitine O-acetyltransferase, variant 2 (2496 nt)	3278	2496	57.89
TCONS_00000572	XLOC_000536	NA	MGG_06984	TSS552	=	MGG_06984T0	supercont8.1:3470260-3476416	3932	10.0756	11.9801	10.8603	9.17989	10.1868	13.0857	11.3124	11.5421	DNA-directed RNA polymerase III subunit RPC2 (3477 nt)	3932	3477	52.43
TCONS_00000573	XLOC_000537	NA	MGG_06986	TSS553	=	MGG_06986T0	supercont8.1:3477178-3478942	1071	2.35231	7.58245	1.56977	2.88811	2.59906	5.96661	8.47445	8.30631	hypothetical protein (1071 nt)	1071	1071	56.4
TCONS_00000574	XLOC_000538	NA	MGG_16233	TSS554	=	MGG_16233T0	supercont8.1:3479793-3481385	1032	4.51819	7.271	4.60991	4.81746	4.1272	7.31553	6.73388	7.7636	hypothetical protein (924 nt)	1032	924	60.71
TCONS_00000575	XLOC_000539	NA	MGG_06988	TSS555	=	MGG_06988T0	supercont8.1:3483024-3483834	810	0.25455	0.713281	0.252953	0	0.510698	0.87424	0.744884	0.52072	hypothetical protein (810 nt)	810	810	63.95
TCONS_00000577	XLOC_000541	NA	MGG_06991	TSS557	=	MGG_06991T0	supercont8.1:3495865-3499103	2122	3.11648	1.77341	2.43769	3.93811	2.97364	1.25471	2.16489	1.90062	hypothetical protein (1023 nt)	2122	1023	55.23
TCONS_00000578	XLOC_000542	NA	MGG_06993	TSS558	=	MGG_06993T0	supercont8.1:3499292-3500674	1315	54.8788	44.1812	51.7412	56.6104	56.2846	44.0496	43.9498	44.5443	HIRA-interacting protein 5 (960 nt)	1315	960	55.73
TCONS_00000579	XLOC_000543	NA	MGG_11783	TSS559	=	MGG_11783T0	supercont8.1:3503420-3509171	5168	68.673	64.3518	72.932	65.9142	67.1728	67.6893	62.2373	63.1287	PSP1 domain-containing protein (2661 nt)	5168	2661	56.63
TCONS_00000580	XLOC_000544	NA	MGG_11781	TSS560	=	MGG_11781T0	supercont8.1:3510212-3511891	1545	3.51122	5.62073	3.0644	3.74774	3.72152	5.49519	5.97575	5.39124	hypothetical protein (1242 nt)	1545	1242	49.28
TCONS_00000581	XLOC_000545	NA	MGG_06995	TSS561	=	MGG_06995T0	supercont8.1:3514073-3516807	1707	28.4409	20.4966	30.1961	28.2852	26.8413	18.9233	21.3127	21.2536	37S ribosomal protein S5 (1335 nt)	1707	1335	57.38
TCONS_00000582	XLOC_000546	NA	MGG_11779	TSS562	=	MGG_11779T0	supercont8.1:3516901-3524086	6912	3.40122	3.03397	3.71744	3.48316	3.00304	3.2283	2.86035	3.01325	hypothetical protein (5829 nt)	6912	5829	53.99
TCONS_00000583	XLOC_000547	NA	MGG_16236	TSS563	=	MGG_16236T0	supercont8.1:3528725-3532385	1498	4.98063	3.88368	5.69019	4.85368	4.39801	4.37436	3.58808	3.68861	hypothetical protein (1230 nt)	1498	1230	59.35
TCONS_00000584	XLOC_000548	NA	MGG_07000	TSS564	=	MGG_07000T0	supercont8.1:3532658-3536259	3464	53.5439	76.3199	59.6664	51.3588	49.6064	81.2996	74.5881	73.0721	ribonucleoside-diphosphate reductase large subunit (2730 nt)	3464	2730	55.31
TCONS_00000585	XLOC_000549	NA	MGG_16237	TSS565	=	MGG_16237T0	supercont8.1:3538046-3540488	588	0	0.0776127	0	0	0	0	0.116496	0.116342	hypothetical protein (588 nt)	588	588	50.68
TCONS_00000586	XLOC_000550	NA	MGG_07003	TSS566	=	MGG_07003T0	supercont8.1:3545120-3550216	5024	20.6044	23.533	18.5528	22.1792	21.0811	21.8262	24.6592	24.1136	CAMKK/META protein kinase (3621 nt)	5024	3621	55.95
TCONS_00000587	XLOC_000551	NA	MGG_16239	TSS567	=	MGG_16239T0	supercont8.1:3551643-3552866	758	0.522888	0.294544	1.00783	0.421357	0.139473	0.233293	0.244081	0.406258	hypothetical protein (357 nt)	758	357	54.62
TCONS_00000588	XLOC_000552	NA	MGG_07005	TSS568	=	MGG_07005T0	supercont8.1:3555081-3556955	1638	422.955	41.3931	472.844	409.399	386.624	47.7405	37.039	39.3998	hypothetical protein (852 nt)	1638	852	60.8
TCONS_00000589	XLOC_000553	NA	MGG_07006	TSS569	=	MGG_07006T0	supercont8.1:3560031-3562865	1308	23.8369	18.6262	22.6695	24.7186	24.1226	17.2372	19.7658	18.8755	hypothetical protein (954 nt)	1308	954	60.9
TCONS_00000590	XLOC_000554	NA	MGG_07008	TSS570	=	MGG_07008T0	supercont8.1:3563057-3565910	2587	46.8596	21.7316	57.4568	42.3326	40.7893	24.9146	20.4698	19.8104	nucleolar protein nop-58 (1800 nt)	2587	1800	56.39
TCONS_00000591	XLOC_000555	NA	MGG_07009	TSS571	=	MGG_07009T0	supercont8.1:3565960-3568792	1011	9.09399	18.8749	11.5313	9.68917	6.06153	21.4396	17.408	17.7771	oxidoreductase (744 nt)	1011	744	62.1
TCONS_00000592	XLOC_000556	NA	MGG_07011	TSS572	=	MGG_07011T0	supercont8.1:3569414-3571668	2254	3.2627	3.56381	3.3571	3.7624	2.66861	3.34821	4.14135	3.20186	hypothetical protein (1125 nt)	2254	1125	60.18
TCONS_00000593	XLOC_000557	NA	MGG_07015	TSS573	=	MGG_07015T0	supercont8.1:3583898-3588288	2850	54.437	17.5517	61.3673	51.5365	50.407	19.3845	16.5604	16.7103	DNA repair protein Rad7 (1908 nt)	2850	1908	52.15
TCONS_00000595	XLOC_000559	NA	MGG_07019	TSS575	=	MGG_07019T0	supercont8.1:3594493-3596946	2192	0.996037	1.92427	1.09501	0.910429	0.98267	2.30891	1.60695	1.85694	4-coumaryl-CoA ligase (1728 nt)	2192	1728	62.21
TCONS_00000596	XLOC_000560	NA	MGG_11774	TSS576	=	MGG_11774T0	supercont8.1:3600955-3603724	2541	5.31671	66.9419	4.73505	5.69439	5.52068	62.4241	69.1795	69.2222	endoglucanase (1284 nt)	2541	1284	65.65
TCONS_00000597	XLOC_000561	NA	MGG_14560	TSS577	=	MGG_14560T0	supercont8.1:3612605-3613769	393	0	0.0783166	0	0	0	0.23495	0	0	hypothetical protein (393 nt)	393	393	57.76
TCONS_00000598	XLOC_000562	NA	MGG_11773	TSS578	=	MGG_11773T0	supercont8.1:3614050-3617294	3012	9.76265	11.6572	10.0223	9.62471	9.6409	11.3392	11.9788	11.6537	bud site selection protein 6 (3012 nt)	3012	3012	55.15
TCONS_00000599	XLOC_000563	NA	MGG_14559	TSS579	=	MGG_14559T0	supercont8.1:3621436-3621898	360	0.317637	0.553323	0	0	0.952911	0	0.830516	0.829453	hypothetical protein (360 nt)	360	360	63.33
TCONS_00000600	XLOC_000564	NA	MGG_14558	TSS580	=	MGG_14558T0	supercont8.1:3622182-3629563	7290	12.7542	11.6203	11.2647	13.4131	13.5847	9.32422	12.5704	12.9664	hypothetical protein (6918 nt)	7290	6918	58.56
TCONS_00000601	XLOC_000565	NA	MGG_09175	TSS581	=	MGG_09175T0	supercont8.1:3629776-3631500	1511	6.934	17.1767	7.8715	6.5478	6.3827	19.0214	15.8824	16.6262	beta-lactamase (1302 nt)	1511	1302	65.98
TCONS_00000602	XLOC_000566	NA	MGG_09177	TSS582	=	MGG_09177T0	supercont8.1:3634519-3636498	1979	1.13817	3.18545	1.20828	0.886213	1.32002	3.21373	3.13494	3.20767	hypothetical protein (1815 nt)	1979	1815	53.94
TCONS_00000603	XLOC_000567	NA	MGG_09178	TSS583	=	MGG_09178T0	supercont8.1:3636864-3638589	1572	0.41626	0.421236	0.277227	0.34446	0.627092	0.265662	0.565891	0.432154	hypothetical protein (1134 nt)	1572	1134	61.99
TCONS_00000604	XLOC_000568	NA	MGG_09179	TSS584	=	MGG_09179T0	supercont8.1:3640036-3642508	2042	9.82996	67.7552	11.5383	8.47421	9.47738	69.5266	66.8652	66.8737	hypothetical protein (1686 nt)	2042	1686	56.88
TCONS_00000605	XLOC_000569	NA	MGG_09180	TSS585	=	MGG_09180T0	supercont8.1:3642666-3644265	1404	0.681505	3.31251	0.544678	0.915449	0.584387	3.87575	3.14659	2.91518	hypothetical protein (1332 nt)	1404	1332	67.27
TCONS_00000606	XLOC_000570	NA	MGG_09184	TSS586	=	MGG_09184T0	supercont8.1:3650290-3657204	2711	12.3866	22.2501	13.8675	11.6245	11.6679	24.2496	20.7004	21.8005	long-chain base protein 3 (1794 nt)	2711	1794	57.36
TCONS_00000608	XLOC_000571	NA	MGG_09186	TSS587	=	MGG_09186T0	supercont8.1:3664602-3671478	6384	41.2097	29.0414	36.6032	43.8896	43.1363	27.0301	30.5737	29.5203	hypothetical protein (4590 nt)	6384	4590	56.47
TCONS_00000610	XLOC_000572	NA	MGG_09188	TSS589	=	MGG_09188T0	supercont8.1:3673831-3675601	1586	5.41045	179.42	5.5859	5.11489	5.53058	185.31	177.286	175.664	malate dehydrogenase (792 nt)	1586	792	61.87
TCONS_00000611	XLOC_000573	NA	MGG_09189	TSS590	=	MGG_09189T0	supercont8.1:3676676-3678576	1707	1.71581	4.23955	1.91867	1.41165	1.81711	4.4477	4.18372	4.08723	cellobiose dehydrogenase (1707 nt)	1707	1707	60.52
TCONS_00000612	XLOC_000574	NA	MGG_09190	TSS591	=	MGG_09190T0	supercont8.1:3678989-3683856	4506	45.3345	75.2306	46.3484	44.7932	44.8618	80.2876	74.4734	70.9307	aminopeptidase 2 (3108 nt)	4506	3108	55.12
TCONS_00000613	XLOC_000575	NA	MGG_09192	TSS592	=	MGG_09192T1	supercont8.1:3684621-3689499	4818	22.0941	14.4428	22.6031	21.8085	21.8707	15.4491	13.2023	14.6769	IQ calmodulin-binding domain-containing protein domain-containing protein, variant (3135 nt)	4818	3135	61.37
TCONS_00000614	XLOC_000575	NA	MGG_09192	TSS593	=	MGG_09192T0	supercont8.1:3684621-3689499	3195	0.858713	0.863727	1.17605	0.750635	0.649458	1.21506	0.777802	0.598316	IQ calmodulin-binding domain-containing protein domain-containing protein (3195 nt)	3195	3195	61.35
TCONS_00000615	XLOC_000576	NA	MGG_09193	TSS594	=	MGG_09193T0	supercont8.1:3691515-3693894	1861	250.332	134.209	290.63	232.835	227.531	153.399	122.307	126.922	L-fucose-proton symporter (1434 nt)	1861	1434	59.62
TCONS_00000617	XLOC_000578	NA	MGG_09195	TSS596	=	MGG_09195T0	supercont8.1:3697059-3698837	1458	64.1406	36.2024	75.9509	61.0907	55.3802	41.2628	32.335	35.0094	rRNA 2'-O-methyltransferase fibrillarin (966 nt)	1458	966	61.28
TCONS_00000618	XLOC_000579	NA	MGG_09197	TSS597	=	MGG_09197T0	supercont8.1:3702883-3705451	2568	2.16326	1.15035	2.01167	1.7988	2.67931	1.19205	1.21716	1.04186	hypothetical protein (2112 nt)	2568	2112	51.37
TCONS_00000619	XLOC_000580	NA	MGG_09198	TSS598	=	MGG_09198T0	supercont8.1:3709390-3712036	2339	2.46143	4.85612	2.57011	2.58087	2.2333	5.1027	4.34072	5.12493	ent-kaurene oxidase (1674 nt)	2339	1674	56.09
TCONS_00000620	XLOC_000581	NA	MGG_11771	TSS599	=	MGG_11771T0	supercont8.1:3714384-3720337	2014	25.2062	29.8558	26.8699	22.5112	26.2375	30.5858	28.4782	30.5034	ubiquitin carboxyl-terminal hydrolase 2 (987 nt)	2014	987	65.35
TCONS_00000622	XLOC_000583	NA	MGG_11770	TSS601	=	MGG_11770T0	supercont8.1:3731428-3732115	483	0.758703	1.58541	1.1831	0.274684	0.818328	1.89859	1.27099	1.58665	hypothetical protein (483 nt)	483	483	57.56
TCONS_00000623	XLOC_000584	NA	MGG_09205	TSS602	=	MGG_09205T0	supercont8.1:3737759-3740821	2797	28.9825	37.0929	27.3658	30.5918	28.99	36.1973	38.0593	37.0222	E3 ubiquitin-protein ligase HRD1 (2457 nt)	2797	2457	55.88
TCONS_00000624	XLOC_000585	NA	MGG_16243	TSS603	=	MGG_16243T0	supercont8.1:3741348-3746034	4550	3.06258	1.31282	3.13215	3.70304	2.35255	1.49356	1.56545	0.879456	hypothetical protein (2625 nt)	4550	2625	55.81
TCONS_00000625	XLOC_000585	NA	MGG_16243	TSS603	=	MGG_16243T1	supercont8.1:3741348-3746034	4483	2.01067	6.11769	1.7684	1.25306	3.01054	6.69912	5.3178	6.33616	hypothetical protein, variant (2589 nt)	4483	2589	56.08
TCONS_00000627	XLOC_000587	NA	MGG_16246	TSS605	=	MGG_16246T0	supercont8.1:3756190-3757083	426	0	0.415557	0	0	0	0.454806	0.791864	0	hypothetical protein (426 nt)	426	426	53.76
TCONS_00000628	XLOC_000588	NA	MGG_11764	TSS606	=	MGG_11764T0	supercont8.1:3758564-3763158	3857	519.094	174.841	516.017	526.784	514.481	175.639	166.236	182.649	hypothetical protein (1992 nt)	3857	1992	56.28
TCONS_00000629	XLOC_000588	NA	MGG_11764	TSS606	=	MGG_11764T1	supercont8.1:3758564-3763158	4018	533.074	186.146	482.078	558.333	558.812	167.526	201.335	189.578	hypothetical protein, variant (1749 nt)	4018	1749	56.26
TCONS_00000630	XLOC_000589	NA	MGG_09209	TSS607	=	MGG_09209T0	supercont8.1:3769273-3772094	2588	26.5682	22.2133	27.0718	26.195	26.438	24.0788	21.6491	20.9118	phosphatase DCR2 (1677 nt)	2588	1677	54.32
TCONS_00000631	XLOC_000590	NA	MGG_09210	TSS608	=	MGG_09210T0	supercont8.1:3773874-3776608	2579	55.6215	48.5122	55.9747	56.0693	54.8206	48.8517	48.654	48.031	ssh-4 (1515 nt)	2579	1515	54.06
TCONS_00000632	XLOC_000591	NA	MGG_09211	TSS609	=	MGG_09211T0	supercont8.1:3779812-3782610	2798	39.9723	8.57249	34.121	43.8203	41.9756	7.39477	8.98276	9.33994	FAD binding domain-containing protein (1884 nt)	2798	1884	58.6
TCONS_00000633	XLOC_000592	NA	MGG_09212	TSS610	=	MGG_09212T0	supercont8.1:3782984-3787531	1881	51.9733	51.3958	44.6694	56.4046	54.8459	46.2374	54.0794	53.8704	nitroreductase (879 nt)	1881	879	58.7
TCONS_00000634	XLOC_000593	NA	MGG_09214	TSS611	=	MGG_09214T0	supercont8.1:3788062-3792658	4516	19.1811	20.2926	19.3717	19.2075	18.964	20.4442	20.1192	20.3144	hypothetical protein (2022 nt)	4516	2022	56.68
TCONS_00000635	XLOC_000594	NA	MGG_09215	TSS612	=	MGG_09215T0	supercont8.1:3797886-3805681	6275	10.4693	23.2399	10.0458	10.6863	10.676	21.4026	24.1261	24.1911	hypothetical protein (5031 nt)	6275	5031	57.36
TCONS_00000636	XLOC_000595	NA	MGG_09217	TSS613	=	MGG_09217T0	supercont8.1:3805778-3809006	1987	19.1274	21.3162	21.4708	17.6451	18.2663	21.7928	21.335	20.8207	hypothetical protein (1257 nt)	1987	1257	63.96
TCONS_00000637	XLOC_000596	NA	MGG_09223	TSS614	=	MGG_09223T0	supercont8.1:3819254-3821591	2337	11.7004	12.4372	11.4579	11.4402	12.203	11.0254	13.1627	13.1235	alpha-N-arabinofuranosidase 2 (1248 nt)	2337	1248	55.21
TCONS_00000638	XLOC_000597	NA	MGG_09224	TSS615	=	MGG_09224T0	supercont8.1:3821677-3823690	2013	4.96465	2.67956	5.01418	5.04389	4.83588	2.92327	2.59723	2.51817	hypothetical protein (2013 nt)	2013	2013	55.94
TCONS_00000639	XLOC_000598	NA	MGG_09225	TSS616	=	MGG_09225T0	supercont8.1:3825648-3826998	1252	63.3802	10.3482	53.803	70.7558	65.5819	9.33593	11.1867	10.522	hypothetical protein (1053 nt)	1252	1053	60.49
TCONS_00000640	XLOC_000599	NA	MGG_16249	TSS617	=	MGG_16249T0	supercont8.1:3839212-3840058	395	0.679937	0.456906	0.860927	0	1.17888	0	0.914206	0.456512	hypothetical protein (279 nt)	395	279	53.41
TCONS_00000641	XLOC_000600	NA	MGG_16250	TSS618	=	MGG_16250T0	supercont8.1:3844945-3850176	1403	5.54991	3.3065	4.91157	5.82446	5.91369	3.28439	3.11126	3.52385	hypothetical protein (1203 nt)	1403	1203	60.68
TCONS_00000642	XLOC_000600	NA	MGG_16251	TSS619	=	MGG_16251T0	supercont8.1:3844945-3850176	3487	13.3063	15.8825	12.0425	14.1666	13.7098	14.5647	15.9889	17.0938	hypothetical protein (810 nt)	3487	810	61.73
TCONS_00000644	XLOC_000602	NA	MGG_11758	TSS621	=	MGG_11758T0	supercont8.1:3852625-3859572	6947	1.98204	2.25028	1.65365	2.09545	2.19702	2.25129	2.26827	2.23127	hypothetical protein (5880 nt)	6947	5880	57.77
TCONS_00000645	XLOC_000603	NA	MGG_09233	TSS622	=	MGG_09233T0	supercont8.1:3861531-3864823	1575	0.127159	0.424097	0.153138	0.11457	0.113769	0.475481	0.531446	0.265363	hypothetical protein (1539 nt)	1575	1539	61.99
TCONS_00000646	XLOC_000604	NA	MGG_09237	TSS623	=	MGG_09237T0	supercont8.1:3873308-3877810	1369	237.616	45.7834	203.272	254.34	255.236	38.412	48.6443	50.294	hypothetical protein (1140 nt)	1369	1140	67.02
TCONS_00000647	XLOC_000605	NA	MGG_09239	TSS624	=	MGG_09239T0	supercont8.1:3879958-3884169	2351	42.5149	49.114	42.4567	42.0906	42.9974	48.5971	48.3116	50.4332	squalene synthase (1398 nt)	2351	1398	54.79
TCONS_00000648	XLOC_000606	NA	MGG_09240	TSS625	=	MGG_09240T0	supercont8.1:3886451-3889374	2637	8.46417	13.3001	9.04379	7.44507	8.90367	13.428	13.1044	13.3678	F-box domain-containing protein (1929 nt)	2637	1929	59.15
TCONS_00000649	XLOC_000607	NA	MGG_09241	TSS626	=	MGG_09241T0	supercont8.1:3890398-3892411	1211	0.336501	1.00792	0.311354	0.389069	0.309079	1.1307	0.811939	1.08112	hypothetical protein (945 nt)	1211	945	58.73
TCONS_00000650	XLOC_000608	NA	MGG_11754	TSS627	=	MGG_11754T0	supercont8.1:3893153-3897461	2522	2.03847	25.5514	2.52768	1.73246	1.85525	28.8305	24.3514	23.4723	SMDR1 (2163 nt)	2522	2163	64.59
TCONS_00000651	XLOC_000609	NA	MGG_09243	TSS628	=	MGG_09243T0	supercont8.1:3897734-3899262	1434	29.6409	15.3091	36.4737	25.3946	27.0544	18.644	14.0575	13.2257	GPI mannosyltransferase 1 (1320 nt)	1434	1320	63.71
TCONS_00000653	XLOC_000611	NA	MGG_09246	TSS630	=	MGG_09246T0	supercont8.1:3910045-3912858	2741	25.9851	56.2343	25.4871	25.7694	26.6988	54.0538	58.3443	56.3049	protease (1536 nt)	2741	1536	59.18
TCONS_00000654	XLOC_000612	NA	MGG_09247	TSS631	=	MGG_09247T0	supercont8.1:3913676-3916753	3077	3.62386	5.78497	3.51569	4.22383	3.13207	5.65458	5.56799	6.13236	hypothetical protein (846 nt)	3077	846	56.26
TCONS_00000655	XLOC_000613	NA	MGG_11750	TSS632	=	MGG_11750T0	supercont8.1:3926047-3927707	1660	981.67	561.075	908.968	1031.57	1004.47	527.855	572.84	582.532	hypothetical protein (1005 nt)	1660	1005	60.7
TCONS_00000656	XLOC_000614	NA	MGG_09252	TSS633	=	MGG_09252T0	supercont8.1:3933503-3934073	570	0.209935	0.358222	0	0.210914	0.418892	0.34268	0.366236	0.36575	hypothetical protein (570 nt)	570	570	61.05
TCONS_00000657	XLOC_000615	NA	MGG_09253	TSS634	=	MGG_09253T0	supercont8.1:3934562-3936980	932	42.7117	36.3419	54.4775	36.7975	36.86	45.6552	32.4521	30.9184	H/ACA ribonucleoprotein complex subunit 3 (204 nt)	932	204	60.78
TCONS_00000658	XLOC_000616	NA	MGG_09255	TSS635	=	MGG_09255T0	supercont8.1:3937562-3944032	6377	2.7074	3.86558	2.52873	2.82567	2.76779	3.73258	3.73092	4.13324	kinesin-II 85 kDa subunit (5316 nt)	6377	5316	54.21
TCONS_00000659	XLOC_000617	NA	MGG_16259	TSS636	=	MGG_16259T0	supercont8.1:3946692-3951113	2097	566.978	100.276	526.324	589.025	585.584	92.2162	104.576	104.036	hypothetical protein (552 nt)	2097	552	52.36
TCONS_00000661	XLOC_000617	NA	MGG_16260	TSS637	=	MGG_16260T0	supercont8.1:3946692-3951113	1703	0	0.000477036	0	0	0	0	0	0.00143111	hypothetical protein (381 nt)	1703	381	64.04
TCONS_00000663	XLOC_000619	NA	MGG_16261	TSS639	=	MGG_16261T0	supercont8.1:3953920-3954577	216	1.93515	0.502465	5.80544	0	0	1.50739	0	0	hypothetical protein (216 nt)	216	216	53.24
TCONS_00000664	XLOC_000620	NA	MGG_09259	TSS640	=	MGG_09259T0	supercont8.1:3958505-3965394	5766	21.581	17.2453	21.9928	20.7999	21.9504	16.952	17.2022	17.5816	hypothetical protein (4278 nt)	5766	4278	57.48
TCONS_00000665	XLOC_000621	NA	MGG_09260	TSS641	=	MGG_09260T0	supercont8.1:3966465-3967636	1074	237.146	16.5379	244.232	228.731	238.475	18.3036	15.1707	16.1395	integral membrane protein (495 nt)	1074	495	61.41
TCONS_00000666	XLOC_000622	NA	MGG_09261	TSS642	=	MGG_09261T0	supercont8.1:3970574-3971665	969	19.34	18.1378	13.8384	22.5754	21.6062	14.6581	20.0094	19.746	hypothetical protein (969 nt)	969	969	64.91
TCONS_00000667	XLOC_000623	NA	ATG5	TSS643	=	MGG_09262T0	supercont8.1:3974005-3981533	1916	11.1067	18.4815	8.42102	12.356	12.5432	15.1433	20.6699	19.6311	autophagy protein 5 (945 nt)	1916	945	65.61
TCONS_00000669	XLOC_000625	NA	MGG_09265	TSS645	=	MGG_09265T0	supercont8.1:3987409-3989707	2218	19.9177	19.7502	18.7897	20.5926	20.3708	19.3037	19.4888	20.4581	hypothetical protein (1755 nt)	2218	1755	60.34
TCONS_00000670	XLOC_000626	NA	MGG_09272	TSS646	=	MGG_09272T0	supercont8.1:4041250-4045249	3167	50.8191	63.0089	48.7388	53.4064	50.3121	59.899	64.4844	64.6433	beta-glucosidase 1 (2622 nt)	3167	2622	60.83
TCONS_00000671	XLOC_000627	NA	MGG_11741	TSS647	=	MGG_11741T0	supercont8.1:4045360-4048564	3086	0.205535	0.340883	0.207623	0.246079	0.162903	0.325282	0.380617	0.31675	hypothetical protein (2661 nt)	3086	2661	57.01
TCONS_00000672	XLOC_000628	NA	MGG_09273	TSS648	=	MGG_09273T0	supercont8.1:4049281-4053747	3951	6.70561	2.96285	6.19083	7.15523	6.77076	2.69148	3.05184	3.14522	hypothetical protein (2463 nt)	3951	2463	56.96
TCONS_00000674	XLOC_000630	NA	MGG_09275	TSS650	=	MGG_09275T0	supercont8.1:4065101-4071741	5908	0.555888	0.581477	0.396451	0.687805	0.583407	0.627553	0.62103	0.495847	hypothetical protein (4608 nt)	5908	4608	56.66
TCONS_00000675	XLOC_000630	NA	MGG_09275	TSS651	=	MGG_09275T1	supercont8.1:4065101-4071741	5269	24.7129	17.4617	22.5907	25.4745	26.0734	15.5246	18.0793	18.7813	hypothetical protein, variant (4131 nt)	5269	4131	56.6
TCONS_00000676	XLOC_000631	NA	MGG_09276	TSS652	=	MGG_09276T0	supercont8.1:4073044-4076042	2998	1.48779	0.524167	1.40036	1.52283	1.54017	0.673497	0.441634	0.457369	hypothetical protein (2916 nt)	2998	2916	58.64
TCONS_00000677	XLOC_000632	NA	MGG_16269	TSS653	=	MGG_16269T0	supercont8.1:4079342-4080282	309	7.15208	3.23038	8.31107	4.864	8.28117	3.69617	2.79951	3.19546	hypothetical protein (309 nt)	309	309	57.61
TCONS_00000678	XLOC_000633	NA	MGG_09280	TSS654	=	MGG_09280T0	supercont8.1:4089601-4091288	786	0.293048	0.926619	0.344896	0.401386	0.132862	0.766258	0.7751	1.2385	hypothetical protein (465 nt)	786	465	54.84
TCONS_00000679	XLOC_000634	NA	MGG_09283	TSS655	=	MGG_09283T0	supercont8.1:4095146-4098594	3038	15.1786	19.9907	16.6106	14.4579	14.4671	23.0344	18.6586	18.279	NEDD8-activating enzyme E1 catalytic subunit (1305 nt)	3038	1305	56.86
TCONS_00000680	XLOC_000635	NA	MGG_09285	TSS656	=	MGG_09285T0	supercont8.1:4099174-4101460	2116	105.537	96.4592	127.18	92.6701	96.7614	114.738	87.1284	87.5108	hypothetical protein (1467 nt)	2116	1467	60.26
TCONS_00000682	XLOC_000637	NA	MGG_09288	TSS658	=	MGG_09288T0	supercont8.1:4114529-4114762	177	35.7198	10.6932	0	53.7792	53.3803	6.03202	6.52364	19.5239	hypothetical protein (177 nt)	177	177	55.93
TCONS_00000683	XLOC_000638	NA	MGG_09289	TSS659	=	MGG_09289T0	supercont8.1:4115753-4117438	1446	144.6	156.091	139.38	150.969	143.45	147.568	162.529	158.175	hexokinase (1446 nt)	1446	1446	54.7
TCONS_00000684	XLOC_000639	NA	MGG_09291	TSS660	=	MGG_09291T0	supercont8.1:4119731-4123238	3174	30.1148	23.8824	32.832	29.1877	28.3246	25.4912	23.2399	22.9163	vacuolar transporter chaperone 4 (2343 nt)	3174	2343	55.14
TCONS_00000685	XLOC_000640	NA	MGG_09292	TSS661	=	MGG_09292T0	supercont8.1:4123727-4129473	1911	8.41269	3.43706	8.29937	8.43023	8.50846	3.98377	3.49955	2.82786	cystathionine gamma-synthase (1743 nt)	1911	1743	63.51
TCONS_00000686	XLOC_000641	NA	MGG_09294	TSS662	=	MGG_09294T0	supercont8.1:4129634-4136282	1063	194.753	258.523	170.442	209.223	204.595	234.492	266.553	274.524	coatomer subunit zeta (612 nt)	1063	612	58.17
TCONS_00000687	XLOC_000642	NA	MGG_09297	TSS663	=	MGG_09297T0	supercont8.1:4136462-4138246	1719	52.1783	93.2072	59.1416	50.2116	47.1818	103.785	87.0163	88.8209	hypothetical protein (933 nt)	1719	933	60.02
TCONS_00000688	XLOC_000643	NA	MGG_09298	TSS664	=	MGG_09298T0	supercont8.1:4138393-4143468	977	20.9206	24.2744	21.9687	18.8057	21.9875	28.2639	21.6213	22.938	hypothetical protein (609 nt)	977	609	62.89
TCONS_00000689	XLOC_000644	NA	MGG_09300	TSS665	=	MGG_09300T0	supercont8.1:4143717-4149087	3196	15.1772	23.0869	16.3986	14.3552	14.7777	25.122	22.4432	21.6956	DNA replication licensing factor mcm7 (2448 nt)	3196	2448	55.35
TCONS_00000690	XLOC_000645	NA	MGG_09302	TSS666	=	MGG_09302T0	supercont8.1:4149263-4155088	1143	26.1944	16.9333	27.0527	26.6036	24.927	17.1779	16.1943	17.4276	ribosome biogenesis protein (582 nt)	1143	582	63.92
TCONS_00000691	XLOC_000646	NA	MGG_16278	TSS667	=	MGG_16278T0	supercont8.1:4149263-4155088	738	0.696583	3.23554	0.782143	0.873768	0.433837	3.55321	2.86802	3.28539	hypothetical protein (474 nt)	738	474	54.64
TCONS_00000692	XLOC_000647	NA	MGG_09304	TSS668	=	MGG_09304T0	supercont8.1:4157230-4158608	1276	19.4486	26.8867	23.6522	17.9178	16.7758	36.1313	21.8769	22.6518	type-2 protein geranylgeranyltransferase subunit beta (990 nt)	1276	990	56.67
TCONS_00000693	XLOC_000648	NA	MGG_09305	TSS669	=	MGG_09305T0	supercont8.1:4161355-4163202	1572	0.0190028	0.105065	0	0	0.0570083	0.0824052	0.0665754	0.166213	hypothetical protein (1572 nt)	1572	1572	52.42
TCONS_00000694	XLOC_000649	NA	MGG_09307	TSS670	=	MGG_09307T0	supercont8.1:4170670-4173367	2126	26.924	4.89056	29.2157	24.8897	26.6667	5.22983	4.32081	5.12104	hexose transporter (1590 nt)	2126	1590	57.42
TCONS_00000695	XLOC_000650	NA	MGG_16279	TSS671	=	MGG_16279T0	supercont8.1:4175916-4176411	495	0.087285	0.119582	0	0	0.261855	0.206215	0.152532	0	hypothetical protein (495 nt)	495	495	55.56
TCONS_00000696	XLOC_000651	NA	MGG_09311	TSS672	=	MGG_09311T0	supercont8.1:4184026-4188915	3387	16.1474	19.592	17.6215	15.3534	15.4672	20.4367	18.7592	19.58	pH-response regulator protein palC (1524 nt)	3387	1524	60.24
TCONS_00000697	XLOC_000652	NA	ERB1	TSS673	=	MGG_09313T0	supercont8.1:4189106-4191698	2517	12.6151	8.86838	12.6439	12.0852	13.1162	9.2417	8.96385	8.3996	ribosome biogenesis protein ERB1 (2334 nt)	2517	2334	55.4
TCONS_00000699	XLOC_000654	NA	MGG_09882	TSS675	=	MGG_09882T0	supercont8.1:4221630-4225863	3228	207.369	131.629	215.487	200.103	206.517	135.975	130.986	127.925	hypothetical protein (1047 nt)	3228	1047	55.3
TCONS_00000700	XLOC_000655	NA	MGG_09884	TSS676	=	MGG_09884T0	supercont8.1:4227012-4232150	3194	134.114	30.6955	147.226	128.413	126.702	31.8624	29.8423	30.3819	manganese resistance protein MNR2 (2442 nt)	3194	2442	56.76
TCONS_00000701	XLOC_000656	NA	MGG_09886	TSS677	=	MGG_09886T0	supercont8.1:4232252-4233689	1273	94.2672	51.3031	103.687	88.9581	90.1567	55.8927	49.5299	48.4866	prohibitin-2 (912 nt)	1273	912	58.99
TCONS_00000702	XLOC_000657	NA	MGG_09887	TSS678	=	MGG_09887T0	supercont8.1:4233770-4236997	1035	243.744	221.771	205.686	266.461	259.085	189.289	239.372	236.653	NEDD8 (234 nt)	1035	234	55.56
TCONS_00000703	XLOC_000658	NA	MGG_09889	TSS679	=	MGG_09889T0	supercont8.1:4237194-4238804	1610	15.9689	16.7777	13.1124	17.3191	17.4753	13.4283	18.6914	18.2132	hypothetical protein (1155 nt)	1610	1155	65.63
TCONS_00000704	XLOC_000659	NA	MGG_11727	TSS680	=	MGG_11727T0	supercont8.1:4243012-4247466	4282	7.00812	8.31218	7.32176	6.84647	6.85613	8.32126	8.49268	8.12261	calcium-transporting P-type ATPase (3222 nt)	4282	3222	55.28
TCONS_00000705	XLOC_000660	NA	MGG_11726	TSS681	=	MGG_11726T0	supercont8.1:4247737-4251886	3060	6.00534	12.6307	6.77548	5.02142	6.21912	14.416	11.5381	11.9379	hypothetical protein (2565 nt)	3060	2565	62.3
TCONS_00000706	XLOC_000661	NA	MGG_09895	TSS682	=	MGG_09895T0	supercont8.1:4253251-4255042	1791	10.5077	12.7326	10.0077	10.1539	11.3616	12.3653	13.0972	12.7352	hypothetical protein (1344 nt)	1791	1344	55.13
TCONS_00000707	XLOC_000662	NA	MGG_09896	TSS683	=	MGG_09896T0	supercont8.1:4255188-4257913	2660	9.03118	10.1737	9.61151	9.10725	8.37478	11.3398	9.63431	9.54694	hypothetical protein (1533 nt)	2660	1533	53.56
TCONS_00000708	XLOC_000663	NA	MGG_09898	TSS684	=	MGG_09898T0	supercont8.1:4260999-4269388	8078	3.50425	4.46431	3.24826	3.71995	3.54454	4.40602	4.52558	4.46133	adenylate cyclase (6054 nt)	8078	6054	54.94
TCONS_00000709	XLOC_000664	NA	MGG_09899	TSS685	=	MGG_09899T0	supercont8.1:4269693-4272584	1582	168.137	305.023	176.814	163.579	164.019	329.195	294.125	291.747	hypothetical protein (411 nt)	1582	411	64.48
TCONS_00000711	XLOC_000666	NA	MGG_09906	TSS687	=	MGG_09906T0	supercont8.1:4293966-4295762	1495	16.7461	27.0537	23.8231	12.4663	13.9491	35.7786	22.9532	22.4292	mitochondrial phosphate carrier protein 2 (966 nt)	1495	966	55.07
TCONS_00000712	XLOC_000667	NA	MGG_09907	TSS688	=	MGG_09907T0	supercont8.1:4297289-4302074	3433	22.6672	33.4562	22.9174	23.7282	21.3561	33.184	33.219	33.9657	ubiquitin carboxyl-terminal hydrolase 13 (2301 nt)	3433	2301	53.02
TCONS_00000713	XLOC_000668	NA	MGG_09909	TSS689	=	MGG_09909T0	supercont8.1:4302263-4305066	2635	35.9713	25.5433	43.4145	32.0724	32.4269	29.2184	23.7876	23.624	alpha-1,6-mannosyltransferase subunit (1800 nt)	2635	1800	57.22
TCONS_00000714	XLOC_000669	NA	MGG_09910	TSS690	=	MGG_09910T0	supercont8.1:4311350-4313678	2224	62.3785	62.2698	58.9419	64.2442	63.9493	60.4338	63.5355	62.8401	hypothetical protein (1287 nt)	2224	1287	57.5
TCONS_00000715	XLOC_000670	NA	MGG_16292	TSS691	=	MGG_16292T0	supercont8.1:4313839-4314303	390	0.134351	0.524909	0	0	0.403052	0.403069	0.937569	0.23409	hypothetical protein (309 nt)	390	309	49.19
TCONS_00000716	XLOC_000671	NA	MGG_09913	TSS692	=	MGG_09913T0	supercont8.1:4318167-4320226	1867	48.306	61.9076	50.0245	48.5085	46.385	61.5807	62.4556	61.6864	ubiquitin-conjugating enzyme (468 nt)	1867	468	51.28
TCONS_00000717	XLOC_000672	NA	MGG_09914	TSS693	=	MGG_09914T0	supercont8.1:4320468-4322831	2001	99.9658	84.6594	99.6985	99.5786	100.62	85.6751	83.4096	84.8935	vacuolar protein sorting-associated protein 33A (2001 nt)	2001	2001	52.07
TCONS_00000718	XLOC_000673	NA	MGG_09915	TSS694	=	MGG_09915T0	supercont8.1:4323163-4327669	4034	31.5114	10.3618	31.7772	30.5758	32.1813	10.3177	10.5103	10.2574	lysine-specific histone demethylase 1 (3603 nt)	4034	3603	55.79
TCONS_00000719	XLOC_000674	NA	MGG_09917	TSS695	=	MGG_09917T0	supercont8.1:4330240-4334666	4031	23.1113	26.9459	24.4633	23.161	21.7097	28.3175	25.8778	26.6424	DNA topoisomerase 1 (2721 nt)	4031	2721	51.6
TCONS_00000720	XLOC_000675	NA	MGG_09919	TSS696	=	MGG_09919T0	supercont8.1:4340968-4343417	2366	148.023	27.3446	158.021	142.076	143.973	28.9607	26.2907	26.7822	amino transferase (1764 nt)	2366	1764	61.28
TCONS_00000721	XLOC_000676	NA	MGG_16294	TSS697	=	MGG_16294T0	supercont8.1:4343802-4348226	508	0	0.204875	0	0	0	0.176379	0.14621	0.292035	hypothetical protein (444 nt)	508	444	52.03
TCONS_00000723	XLOC_000678	NA	MGG_09923	TSS699	=	MGG_09923T0	supercont8.1:4353453-4355910	2389	33.4669	28.4197	30.288	34.2998	35.8128	27.1062	27.4361	30.7168	hypothetical protein (1563 nt)	2389	1563	58.16
TCONS_00000724	XLOC_000679	NA	MGG_09924	TSS700	=	MGG_09924T0	supercont8.1:4356125-4363417	2674	64.1202	14.4485	65.5685	65.0169	61.7753	14.6623	14.3144	14.3688	protoporphyrinogen oxidase (2088 nt)	2674	2088	62.79
TCONS_00000725	XLOC_000680	NA	MGG_09927	TSS701	=	MGG_09927T0	supercont8.1:4369132-4371177	1665	1081.8	541.565	1242.19	997.031	1006.18	620.672	501.822	502.202	60S ribosomal protein L33-B (330 nt)	1665	330	59.39
TCONS_00000726	XLOC_000681	NA	MGG_16296	TSS702	=	MGG_16296T0	supercont8.1:4372074-4372314	171	8.88999	0	0	26.67	0	0	0	0	hypothetical protein (171 nt)	171	171	41.52
TCONS_00000727	XLOC_000682	NA	MGG_09928	TSS703	=	MGG_09928T0	supercont8.1:4372998-4377898	3607	150.31	69.1153	127.654	160.175	163.102	59.6295	74.083	73.6334	hypothetical protein (1365 nt)	3607	1365	55.09
TCONS_00000728	XLOC_000683	NA	MGG_09930	TSS704	=	MGG_09930T0	supercont8.1:4377967-4382153	4102	3.94941	3.68093	4.10629	3.92489	3.81704	3.98276	3.50896	3.55106	chromodomain-helicase-DNA-binding protein 3 (3147 nt)	4102	3147	52.3
TCONS_00000730	XLOC_000685	NA	MGG_09934	TSS706	=	MGG_09934T0	supercont8.1:4398114-4402758	1902	0.261005	0.523953	0.322186	0.138929	0.321899	0.417789	0.644518	0.509552	dUTPase (1731 nt)	1902	1731	51.94
TCONS_00000731	XLOC_000686	NA	MGG_16298	TSS707	=	MGG_16298T0	supercont8.1:4403566-4410244	1241	1609.91	182.898	1613.93	1596.59	1619.2	179.53	183.762	185.403	hypothetical protein (783 nt)	1241	783	55.94
TCONS_00000733	XLOC_000686	NA	MGG_16299	TSS708	=	MGG_16299T0	supercont8.1:4403566-4410244	5068	3.54852	6.90738	0	4.5281	6.11746	0	8.29387	12.4283	hypothetical protein (1818 nt)	5068	1818	59.9
TCONS_00000734	XLOC_000687	NA	MGG_14550	TSS709	=	MGG_14550T0	supercont8.1:4417066-4419248	1664	14.4617	103.52	16.0896	13.7225	13.5731	108.809	100.414	101.338	hypothetical protein (900 nt)	1664	900	58.44
TCONS_00000735	XLOC_000688	NA	MGG_14549	TSS710	=	MGG_14549T0	supercont8.1:4419603-4420336	495	39.512	67.4627	40.7447	40.6078	37.1834	67.4826	69.8598	65.0456	cytidine deaminase (495 nt)	495	495	58.99
TCONS_00000736	XLOC_000689	NA	MGG_09941	TSS711	=	MGG_09941T0	supercont8.1:4421844-4427597	4860	61.8483	162.973	70.0751	57.4059	58.0637	183.993	153.667	151.259	nod factor export ATP-binding protein I (4860 nt)	4860	4860	56.58
TCONS_00000737	XLOC_000690	NA	MGG_09942	TSS712	=	MGG_09942T0	supercont8.1:4428285-4430553	2185	71.0242	9.047	73.6513	70.8264	68.595	9.41381	9.35306	8.37413	hypothetical protein (1338 nt)	2185	1338	64.28
TCONS_00000738	XLOC_000691	NA	MGG_09944	TSS713	=	MGG_09944T0	supercont8.1:4435791-4438845	3054	8.36479	11.124	7.32	9.45566	8.31871	10.8561	11.2576	11.2583	ELMO/CED-12 family protein (2235 nt)	3054	2235	61.7
TCONS_00000739	XLOC_000692	NA	MGG_09945	TSS714	=	MGG_09945T0	supercont8.1:4439239-4441827	2292	131.03	170.557	128.128	130.881	134.082	165.72	174.786	171.165	averantin oxidoreductase (1383 nt)	2292	1383	57.05
TCONS_00000740	XLOC_000693	NA	MGG_09946	TSS715	=	MGG_09946T0	supercont8.1:4442094-4443542	1344	27.2634	35.19	23.991	28.9667	28.8325	30.669	37.0971	37.8038	hypothetical protein (1344 nt)	1344	1344	60.86
TCONS_00000741	XLOC_000694	NA	MGG_09948	TSS716	=	MGG_09948T0	supercont8.1:4450922-4455039	1372	31.1764	28.5106	32.4709	32.912	28.1464	29.6116	27.9206	27.9996	splicing factor U2AF 23 kDa subunit (630 nt)	1372	630	54.29
TCONS_00000742	XLOC_000695	NA	MGG_11715	TSS717	=	MGG_11715T0	supercont8.1:4458245-4462741	4417	20.3986	23.2949	19.2162	21.474	20.5056	21.069	24.2182	24.5974	hypothetical protein (3417 nt)	4417	3417	55.25
TCONS_00000743	XLOC_000696	NA	MGG_14547	TSS718	=	MGG_14547T0	supercont8.1:4462997-4467495	1344	26.5489	39.673	27.0646	25.4577	27.1244	42.7644	36.5386	39.7159	hypothetical protein (822 nt)	1344	822	59
TCONS_00000744	XLOC_000697	NA	MGG_09950	TSS719	=	MGG_09950T0	supercont8.1:4470165-4474370	3840	0.299442	0.984158	0.272022	0.260229	0.366075	0.916054	1.0189	1.01752	C2H2 type zinc finger domain-containing protein (2979 nt)	3840	2979	55.09
TCONS_00000745	XLOC_000698	NA	MGG_09951	TSS720	=	MGG_09951T0	supercont8.1:4474514-4479090	1551	7.07959	8.78402	6.76834	7.9287	6.54173	8.58346	9.09299	8.67561	oxidoreductase (933 nt)	1551	933	64.52
TCONS_00000746	XLOC_000699	NA	MGG_09954	TSS721	=	MGG_09954T0	supercont8.1:4485114-4490699	4910	2.17605	3.58562	2.51871	2.02847	1.98096	4.22645	3.12166	3.40876	RSP (3147 nt)	4910	3147	52.4
TCONS_00000747	XLOC_000700	NA	MGG_09955	TSS722	=	MGG_09955T0	supercont8.1:4492307-4494101	1131	1008.32	538.625	908.684	1069.6	1046.69	484.819	565.591	565.464	hypothetical protein (345 nt)	1131	345	52.46
TCONS_00000748	XLOC_000701	NA	MGG_09960	TSS723	=	MGG_09960T0	supercont8.1:4506083-4510456	3938	10.2516	12.2257	9.77913	9.77759	11.198	11.4114	12.1517	13.1139	PLK protein kinase (3030 nt)	3938	3030	56.07
TCONS_00000749	XLOC_000702	NA	MGG_10646	TSS724	=	MGG_10646T0	supercont8.1:4525193-4529616	4222	12.7413	21.3733	11.0981	13.1118	14.014	18.811	23.1705	22.1384	protoplast regeneration and killer toxin resistance (2457 nt)	4222	2457	58.73
TCONS_00000750	XLOC_000703	NA	MGG_10647	TSS725	=	MGG_10647T0	supercont8.1:4529770-4533285	1122	74.5671	121.818	72.9156	77.9519	72.8338	118.246	123.094	124.113	hypothetical protein (852 nt)	1122	852	60.45
TCONS_00000751	XLOC_000704	NA	MGG_10650	TSS726	=	MGG_10650T0	supercont8.1:4536929-4537323	291	5.88415	4.10958	6.14673	4.12729	7.37843	3.79772	3.3201	5.21091	hypothetical protein (291 nt)	291	291	63.23
TCONS_00000752	XLOC_000705	NA	MGG_10651	TSS727	=	MGG_10651T0	supercont8.1:4539502-4543342	1133	73.6376	57.825	65.7235	74.0032	81.1861	52.6845	61.9495	58.841	50S ribosomal protein L17 (648 nt)	1133	648	58.18
TCONS_00000753	XLOC_000706	NA	MGG_10653	TSS728	=	MGG_10653T0	supercont8.1:4543444-4549541	1998	163.909	149.191	131.049	183.354	177.325	117.471	163.766	166.337	eukaryotic translation initiation factor 3 subunit F (1113 nt)	1998	1113	64.42
TCONS_00000754	XLOC_000707	NA	MGG_15478	TSS729	=	MGG_15478T0	supercont8.1:4549952-4550733	534	10.5971	12.9555	11.0965	10.4998	10.1951	11.4753	14.3119	13.0794	hypothetical protein (534 nt)	534	534	56.74
TCONS_00000755	XLOC_000708	NA	MGG_11707	TSS730	=	MGG_11707T0	supercont8.1:4553452-4555005	1302	9.95123	10.3345	10.8516	9.64111	9.36095	10.9797	9.10841	10.9153	hypothetical protein (1302 nt)	1302	1302	52.46
TCONS_00000756	XLOC_000709	NA	MGG_10655	TSS731	=	MGG_10655T0	supercont8.1:4555502-4557644	2076	111.079	89.4813	107.333	114.981	110.921	86.7797	90.8085	90.8557	delta-aminolevulinic acid dehydratase (1170 nt)	2076	1170	60.51
TCONS_00000757	XLOC_000710	NA	MGG_16305	TSS732	=	MGG_16305T0	supercont8.1:4560559-4562163	707	1.29148	1.02911	1.40863	1.69895	0.766864	1.12076	0.894544	1.07202	hypothetical protein (285 nt)	707	285	53.68
TCONS_00000758	XLOC_000711	NA	MGG_10657	TSS733	=	MGG_10657T0	supercont8.1:4563142-4564947	1635	16.824	14.3091	20.4913	15.3165	14.6642	17.7013	12.7646	12.4613	hypothetical protein (1635 nt)	1635	1635	56.09
TCONS_00000760	XLOC_000713	NA	MGG_10661	TSS735	=	MGG_10661T0	supercont8.1:4575854-4580557	1436	22.189	69.9369	19.0225	23.57	23.9745	61.2522	74.8647	73.6938	hypothetical protein (840 nt)	1436	840	55.12
TCONS_00000761	XLOC_000714	NA	MGG_16307	TSS736	=	MGG_16307T0	supercont8.1:4587668-4588227	322	0	0.588039	0	0	0	0.328123	0.718449	0.717547	hypothetical protein (318 nt)	322	318	47.48
TCONS_00000762	XLOC_000715	NA	MGG_11702	TSS737	=	MGG_11702T0	supercont8.1:4592748-4595695	2781	44.0377	45.5341	48.6796	42.305	41.1285	51.845	41.9291	42.8283	lanosterol synthase (2268 nt)	2781	2268	54.14
TCONS_00000763	XLOC_000716	NA	MGG_11701	TSS738	=	MGG_11701T0	supercont8.1:4595881-4601211	4509	2.69411	1.98416	3.28148	2.25368	2.54719	2.17135	1.83875	1.94239	hypothetical protein (1365 nt)	4509	1365	56.34
TCONS_00000764	XLOC_000717	NA	MGG_10668	TSS739	=	MGG_10668T0	supercont8.1:4601387-4603588	2102	38.3646	35.9423	40.3753	36.6024	38.1161	37.1028	35.41	35.314	ceramide glucosyltransferase (1485 nt)	2102	1485	56.09
TCONS_00000765	XLOC_000718	NA	MGG_16308	TSS740	=	MGG_16308T0	supercont8.1:4603964-4605424	1384	0.514586	4.01653	0.483185	0.598404	0.46217	5.07691	3.62352	3.34915	hypothetical protein (1122 nt)	1384	1122	55.97
TCONS_00000766	XLOC_000719	NA	MGG_15143	TSS741	=	MGG_15143T0	supercont8.1:4625487-4626041	324	4.49204	3.6079	4.30118	4.29737	4.87755	3.39985	4.59791	2.82593	hypothetical protein (324 nt)	324	324	53.4
TCONS_00000767	XLOC_000720	NA	MGG_10503	TSS742	=	MGG_10503T0	supercont8.1:4631065-4632969	1904	133.017	160.808	141.121	127.989	129.941	169.066	160.431	152.928	mannitol-1-phosphate 5-dehydrogenase (1203 nt)	1904	1203	55.78
TCONS_00000768	XLOC_000721	NA	MGG_10504	TSS743	=	MGG_10504T0	supercont8.1:4633599-4637291	3120	85.3796	111.311	95.2514	82.1536	78.7338	121.278	106.714	105.942	coatomer beta' subunit (2568 nt)	3120	2568	54.28
TCONS_00000769	XLOC_000722	NA	MGG_10505	TSS744	=	MGG_10505T0	supercont8.1:4637654-4638948	955	0	0.0602079	0	0	0	0	0	0.180624	hypothetical protein (945 nt)	955	945	53.23
TCONS_00000770	XLOC_000723	NA	MGG_10507	TSS745	=	MGG_10507T0	supercont8.1:4641661-4645021	3267	40.4189	40.7467	45.0424	39.5999	36.6142	45.0405	39.4015	37.7979	amidohydrolase (2964 nt)	3267	2964	57.02
TCONS_00000771	XLOC_000724	NA	MGG_10508	TSS746	=	MGG_10508T0	supercont8.1:4646249-4648314	1699	3.43997	9.97177	3.97836	3.73186	2.60968	11.5193	9.0215	9.37453	glucose transporter HXT1 (1593 nt)	1699	1593	59.01
TCONS_00000772	XLOC_000725	NA	MGG_10509	TSS747	=	MGG_10509T0	supercont8.1:4649187-4650877	1365	0.043678	0.0499621	0.0634647	0.0675693	0	0.110765	0	0.0391208	hypothetical protein (1290 nt)	1365	1290	52.33
TCONS_00000773	XLOC_000726	NA	MGG_16311	TSS748	=	MGG_16311T0	supercont8.1:4655455-4656697	892	3.87852	3.51954	6.77426	2.49568	2.36561	5.30359	2.5636	2.69144	hypothetical protein (414 nt)	892	414	53.62
TCONS_00000776	XLOC_000729	NA	MGG_10515	TSS751	=	MGG_10515T0	supercont8.1:4681357-4682826	1379	1.12229	1.89791	1.23769	1.06832	1.06085	1.78638	2.09038	1.81695	hypothetical protein (1011 nt)	1379	1011	59.84
TCONS_00000777	XLOC_000730	NA	MGG_10516	TSS752	=	MGG_10516T0	supercont8.1:4684779-4686897	1410	0.423921	0.694395	0.362655	0.650663	0.258445	0.839019	0.71675	0.527418	hypothetical protein (1410 nt)	1410	1410	54.26
TCONS_00000778	XLOC_000731	NA	MGG_16315	TSS753	=	MGG_16315T0	supercont8.1:4687779-4691999	2330	42.9238	55.7369	40.5563	44.0227	44.1925	51.682	57.7884	57.7402	hypothetical protein (1098 nt)	2330	1098	60.56
TCONS_00000780	XLOC_000731	NA	MGG_16316	TSS754	=	MGG_16316T0	supercont8.1:4687779-4691999	1708	5.69036	11.3488	5.77329	5.59062	5.70715	12.0076	11.0865	10.9523	hypothetical protein (1392 nt)	1708	1392	65.3
TCONS_00000781	XLOC_000732	NA	MGG_10519	TSS755	=	MGG_10519T0	supercont8.1:4692712-4694613	1703	1.24714	0.964595	1.44293	1.15328	1.14521	1.04104	0.759931	1.09282	maltose permease MAL31 (1650 nt)	1703	1650	60.42
TCONS_00000782	XLOC_000733	NA	MGG_16317	TSS756	=	MGG_16317T0	supercont8.1:4703212-4706106	556	0.073033	0.216629	0	0.219099	0	0.143173	0.126804	0.37991	hypothetical protein (405 nt)	556	405	47.65
TCONS_00000783	XLOC_000734	NA	MGG_10524	TSS757	=	MGG_10524T0	supercont8.1:4710878-4711818	940	502.509	169.776	363.36	569.593	574.573	122.99	192.316	194.023	hypothetical protein (330 nt)	940	330	63.94
TCONS_00000784	XLOC_000735	NA	MGG_10526	TSS758	=	MGG_10526T0	supercont8.1:4716962-4722478	5451	11.9204	15.7548	13.3893	10.933	11.4388	17.2742	15.2756	14.7147	hypothetical protein (4905 nt)	5451	4905	52.7
TCONS_00000785	XLOC_000736	NA	MGG_10527	TSS759	=	MGG_10527T0	supercont8.1:4723606-4725631	1705	0	0.0303433	0	0	0	0	0.060714	0.0303159	ent-kaurene oxidase (1680 nt)	1705	1680	50.71
TCONS_00000786	XLOC_000737	NA	MGG_10538	TSS760	=	MGG_10538T0	supercont8.1:4737275-4740056	2698	16.7815	20.3155	16.7595	17.7169	15.868	20.0177	20.643	20.2857	hypothetical protein (1770 nt)	2698	1770	58.7
TCONS_00000787	XLOC_000738	NA	MGG_16319	TSS761	=	MGG_16319T0	supercont8.1:4740306-4743272	2870	13.7303	12.7478	11.7453	14.6273	14.8183	11.4047	13.1116	13.7271	hypothetical protein (2145 nt)	2870	2145	61.31
TCONS_00000788	XLOC_000739	NA	MGG_16320	TSS762	=	MGG_16320T0	supercont8.1:4743457-4747984	222	0.855672	0.533352	0	0	2.56702	1.60006	0	0	hypothetical protein (222 nt)	222	222	53.6
TCONS_00000789	XLOC_000740	NA	MGG_10529	TSS763	=	MGG_10529T0	supercont8.1:4749931-4753165	2832	24.2507	26.2779	22.0848	26.2889	24.3784	25.0072	27.4181	26.4085	fungal specific transcription factor domain-containing protein (2373 nt)	2832	2373	53.27
TCONS_00000790	XLOC_000741	NA	MGG_10530	TSS764	=	MGG_10530T0	supercont8.1:4753928-4756237	1596	0.465262	10.2109	0.440486	0.394984	0.560316	11.7675	9.45542	9.40995	sugar transporter (1596 nt)	1596	1596	59.59
TCONS_00000791	XLOC_000742	NA	MGG_10531	TSS765	=	MGG_10531T0	supercont8.1:4757322-4757874	435	1.29607	7.7555	2.24668	0.659358	0.98218	6.69899	7.81306	8.75444	hypothetical protein (435 nt)	435	435	68.05
TCONS_00000792	XLOC_000743	NA	MGG_10534	TSS766	=	MGG_10534T0	supercont8.1:4768605-4770757	2152	0.48959	7.13899	0.179585	0.807861	0.481324	9.0331	6.37171	6.01217	multidrug and toxin extrusion protein 1 (1506 nt)	2152	1506	67.53
TCONS_00000793	XLOC_000744	NA	MGG_15182	TSS767	=	MGG_15182T0	supercont8.1:4784702-4786562	1590	0.0565369	4.64237	0	0.113338	0.0562726	5.1602	4.14015	4.62676	MFS transporter (1590 nt)	1590	1590	64.47
TCONS_00000796	XLOC_000747	NA	MGG_10542	TSS770	=	MGG_10542T0	supercont8.1:4798852-4799391	429	0.34043	1.28945	0.345008	0.676283	0	1.13378	1.56348	1.17108	hypothetical protein (429 nt)	429	429	65.5
TCONS_00000797	XLOC_000748	NA	MGG_10544	TSS771	=	MGG_10544T0	supercont8.1:4805888-4807583	1473	0.0133287	0	0.039986	0	0	0	0	0	hypothetical protein (1473 nt)	1473	1473	61.24
TCONS_00000800	XLOC_000751	NA	MGG_10548	TSS774	=	MGG_10548T0	supercont8.1:4815946-4817222	1276	5.95489	34.5192	6.13462	5.4119	6.31814	39.0701	34.384	30.1036	hypothetical protein (1068 nt)	1276	1068	60.3
TCONS_00000802	XLOC_000753	NA	MGG_10551	TSS776	=	MGG_10551T0	supercont8.1:4823772-4824488	507	0	0.240407	0	0	0	0.28138	0.293356	0.146485	hypothetical protein (507 nt)	507	507	56.61
TCONS_00000805	XLOC_000756	NA	MGG_13016	TSS779	=	MGG_13016T0	supercont8.1:4850789-4852742	1488	0	0.0354491	0	0	0	0	0.106347	0	hypothetical protein (1488 nt)	1488	1488	59.95
TCONS_00000807	XLOC_000758	NA	MGG_05338	TSS781	=	MGG_05338T0	supercont8.1:4863486-4865224	1624	0.218736	1.00079	0.104938	0.276603	0.274667	0.790279	1.31515	0.896938	hypothetical protein (1176 nt)	1624	1176	66.07
TCONS_00000808	XLOC_000759	NA	MGG_13017	TSS782	=	MGG_13017T0	supercont8.1:4867366-4871350	1548	18.4528	22.9915	17.5152	18.6387	19.2045	21.069	24.4937	23.4118	hypothetical protein (825 nt)	1548	825	66.3
TCONS_00000809	XLOC_000760	NA	MGG_05341	TSS783	=	MGG_05341T0	supercont8.1:4872449-4876394	3705	9.60358	15.6233	9.37858	9.50338	9.92878	15.1625	15.5708	16.1367	hypothetical protein (3054 nt)	3705	3054	56.68
TCONS_00000810	XLOC_000761	NA	MGG_05342	TSS784	=	MGG_05342T0	supercont8.1:4876628-4878268	1562	98.8362	62.0784	101.674	97.0966	97.7381	65.0336	61.8313	59.3702	ribonuclease Trv (957 nt)	1562	957	63.22
TCONS_00000811	XLOC_000762	NA	MGG_05343	TSS785	=	MGG_05343T0	supercont8.1:4882195-4885878	3454	90.5113	85.581	93.1821	90.2264	88.1253	86.0786	86.5501	84.1143	C6 zinc finger protein (2262 nt)	3454	2262	53.49
TCONS_00000813	XLOC_000764	NA	MGG_05346	TSS787	=	MGG_05346T0	supercont8.1:4893347-4895038	1612	119.707	79.2798	120.848	119.11	119.163	80.5725	77.3128	79.9541	oxidoreductase domain-containing protein (1113 nt)	1612	1113	63.61
TCONS_00000814	XLOC_000765	NA	MGG_16331	TSS788	=	MGG_16331T0	supercont8.1:4897197-4899939	1844	8.05144	7.6677	8.19274	8.86868	7.0929	8.16811	7.67255	7.16245	hypothetical protein (846 nt)	1844	846	49.88
TCONS_00000815	XLOC_000766	NA	MGG_05350	TSS789	=	MGG_05350T0	supercont8.1:4901850-4906221	3327	8.88343	10.555	9.74782	8.75758	8.1449	10.906	10.6572	10.1018	carboxy-terminal kinesin 2 (2688 nt)	3327	2688	55.58
TCONS_00000816	XLOC_000767	NA	MGG_13019	TSS790	=	MGG_13019T0	supercont8.1:4908383-4909377	801	0.613799	3.58381	0.669791	0.782893	0.388714	3.57409	4.15764	3.01969	hypothetical protein (690 nt)	801	690	61.88
TCONS_00000818	XLOC_000769	NA	MGG_05354	TSS792	=	MGG_05354T0	supercont8.1:4921567-4923142	1065	0	0.0175336	0	0	0	0	0	0.0526009	hypothetical protein (1065 nt)	1065	1065	63.94
TCONS_00000819	XLOC_000770	NA	MGG_05358	TSS793	=	MGG_05358T0	supercont8.1:4936745-4941388	927	20.5173	28.7019	14.9455	23.3311	23.2754	23.3662	31.985	30.7544	LYR family protein (267 nt)	927	267	56.55
TCONS_00000820	XLOC_000771	NA	MGG_05363	TSS794	=	MGG_05363T0	supercont8.1:4953605-4957650	3220	0.45691	0.270773	0.459812	0.391962	0.518955	0.357909	0.242507	0.211905	sugar transporter (2346 nt)	3220	2346	62.87
TCONS_00000821	XLOC_000772	NA	MGG_05366	TSS795	=	MGG_05366T0	supercont8.1:4965480-4968320	2840	1.23271	1.54519	1.31673	1.04598	1.33542	1.48293	1.62936	1.52329	feruloyl esterase B (1896 nt)	2840	1896	63.34
TCONS_00000822	XLOC_000773	NA	MGG_05367	TSS796	=	MGG_05367T0	supercont8.1:4970066-4972643	2577	72.6111	108.037	68.984	75.4302	73.4192	103.229	110.285	110.597	glutathione transferase omega-1 (855 nt)	2577	855	65.26
TCONS_00000823	XLOC_000774	NA	MGG_05368	TSS797	=	MGG_05368T0	supercont8.1:4976765-4978804	1920	7.76832	11.0028	7.8269	7.37806	8.10002	10.6739	11.2943	11.0401	hypothetical protein (1920 nt)	1920	1920	57.45
TCONS_00000824	XLOC_000775	NA	MGG_05369	TSS798	=	MGG_05369T0	supercont8.1:4979557-4981273	1716	22.5371	21.3235	17.683	25.1553	24.7729	17.801	23.1456	23.024	hypothetical protein (1716 nt)	1716	1716	55.65
TCONS_00000825	XLOC_000776	NA	MGG_13024	TSS799	=	MGG_13024T0	supercont8.1:4981497-4982027	339	34.3979	32.5082	34.7156	31.8914	36.5866	29.4029	38.3596	29.7622	hypothetical protein (339 nt)	339	339	57.23
TCONS_00000826	XLOC_000777	NA	MGG_05370	TSS800	=	MGG_05370T0	supercont8.1:4982309-4983425	1116	25.9974	23.7948	23.3201	28.9289	25.7432	23.2519	23.983	24.1494	transcription initiation factor IIB (1116 nt)	1116	1116	58.78
TCONS_00000828	XLOC_000779	NA	MGG_05371	TSS802	=	MGG_05371T0	supercont8.1:4984241-4990016	2989	5.13535	4.90265	6.46685	4.80951	4.12968	5.88607	4.15157	4.67032	hypothetical protein (1710 nt)	2989	1710	54.91
TCONS_00000830	XLOC_000779	NA	MGG_13025	TSS803	=	MGG_13025T0	supercont8.1:4984241-4990016	2341	28.7648	25.1506	30.8719	27.258	28.1645	26.3929	24.7383	24.3207	hypothetical protein (1344 nt)	2341	1344	62.65
TCONS_00000831	XLOC_000780	NA	MGG_13026	TSS804	=	MGG_13026T0	supercont8.1:4991582-4992543	961	131.752	146.83	136.674	129.229	129.352	149.85	147.629	143.01	hypothetical protein (738 nt)	961	738	58.54
TCONS_00000833	XLOC_000782	NA	MGG_05375	TSS806	=	MGG_05375T0	supercont8.1:4993616-4994902	1286	12.3193	16.6259	13.0571	11.884	12.0167	17.132	17.2236	15.5222	splicing factor 3a subunit 2 (744 nt)	1286	744	62.23
TCONS_00000835	XLOC_000784	NA	MGG_13028	TSS808	=	MGG_13028T0	supercont8.1:5001862-5004792	1630	11.3663	6.93159	12.086	10.9627	11.0502	6.43021	7.18714	7.17742	mitochondrial import inner membrane translocase subunit tim-54 (1278 nt)	1630	1278	61.35
TCONS_00000836	XLOC_000785	NA	MGG_05379	TSS809	=	MGG_05379T0	supercont8.1:5019739-5024425	4468	23.4791	24.7143	21.0354	24.7693	24.6326	22.2114	25.0988	26.8328	vacuolar protein sorting-associated protein 9 (2244 nt)	4468	2244	56.11
TCONS_00000837	XLOC_000786	NA	MGG_16342	TSS810	=	MGG_16342T0	supercont8.1:5024679-5025077	327	1.0952	2.51709	2.08987	0.599932	0.59581	2.02415	2.41983	3.10729	hypothetical protein (327 nt)	327	327	54.13
TCONS_00000841	XLOC_000789	NA	MGG_16345	TSS814	=	MGG_16345T0	supercont8.1:5055987-5056800	294	0.531769	1.12022	0	0.800386	0.794921	1.06152	1.38016	0.918978	hypothetical protein (294 nt)	294	294	57.14
TCONS_00000845	XLOC_000792	NA	MGG_16347	TSS818	=	MGG_16347T0	supercont8.1:5066829-5067500	531	0	0.136161	0	0	0	0	0.272442	0.136041	hypothetical protein (531 nt)	531	531	56.87
TCONS_00000848	XLOC_000795	NA	MGG_05398	TSS821	=	MGG_05398T0	supercont8.1:5084513-5085420	746	0.0981373	2.03068	0.1519	0	0.142512	3.1846	1.33008	1.57736	hypothetical protein (339 nt)	746	339	52.8
TCONS_00000849	XLOC_000796	NA	MGG_16350	TSS822	=	MGG_16350T0	supercont8.1:5086870-5087211	282	0	0.174027	0	0	0	0	0	0.52208	hypothetical protein (282 nt)	282	282	57.8
TCONS_00000851	XLOC_000797	NA	MGG_05400	TSS823	=	MGG_05400T0	supercont8.1:5089431-5090552	906	0	0.02148	0	0	0	0	0.0644401	0	hypothetical protein (906 nt)	906	906	67
TCONS_00000852	XLOC_000798	NA	MGG_05401	TSS824	=	MGG_05401T0	supercont8.1:5091101-5095276	3712	0.0370915	0.244485	0.0213745	0.0899001	0	0.277593	0.143404	0.312457	bifunctional P-450:NADPH-P450 reductase (3351 nt)	3712	3351	62.25
TCONS_00000854	XLOC_000800	NA	MGG_16352	TSS826	=	MGG_16352T0	supercont8.1:5099292-5099779	385	0.983448	0.400588	1.70644	0.416553	0.827347	0	0.481078	0.720687	hypothetical protein (279 nt)	385	279	53.76
TCONS_00000855	XLOC_000801	NA	MGG_16353	TSS827	=	MGG_16353T0	supercont8.1:5100496-5100853	225	0	0.429894	0	0	0	0	0	1.28968	hypothetical protein (225 nt)	225	225	58.67
TCONS_00000856	XLOC_000802	NA	MGG_05402	TSS828	=	MGG_05402T0	supercont8.1:5101312-5105229	3917	2.63982	5.08071	2.62654	2.97319	2.31971	4.15026	5.64203	5.44983	hypothetical protein (2493 nt)	3917	2493	59.45
TCONS_00000858	XLOC_000804	NA	MGG_05406	TSS830	=	MGG_05406T0	supercont8.1:5116067-5116789	663	911.314	553.566	893.418	927.017	913.508	533.208	561.578	565.911	hypothetical protein (663 nt)	663	663	64.86
TCONS_00000859	XLOC_000805	NA	MGG_13049	TSS831	=	MGG_13049T0	supercont8.1:5122707-5123676	969	0.185929	2.56262	0.253475	0	0.304313	2.48173	2.66397	2.54215	hypothetical protein (969 nt)	969	969	68.11
TCONS_00000860	XLOC_000806	NA	MGG_05411	TSS832	=	MGG_05411T0	supercont8.1:5128327-5130679	2283	3.24752	39.8004	3.97353	2.4608	3.30823	44.6914	37.0401	37.6695	hypothetical protein (2148 nt)	2283	2148	62.01
TCONS_00000861	XLOC_000807	NA	MGG_16355	TSS833	=	MGG_16355T0	supercont8.1:5133284-5134268	901	0	0.289903	0	0	0	0.415697	0.259584	0.194427	hypothetical protein (516 nt)	901	516	53.68
TCONS_00000862	XLOC_000808	NA	MGG_05413	TSS834	=	MGG_05413T0	supercont8.1:5137985-5140639	2251	3.59245	45.929	3.42229	3.5372	3.81787	43.2403	48.1632	46.3833	MFS transporter (1467 nt)	2251	1467	62.3
TCONS_00000863	XLOC_000809	NA	MGG_05414	TSS835	=	MGG_05414T0	supercont8.1:5141536-5142013	477	0	0.224721	0	0	0	0.349884	0.162246	0.162033	hypothetical protein (477 nt)	477	477	64.99
TCONS_00000867	XLOC_000813	NA	MGG_05423	TSS839	=	MGG_05423T0	supercont8.1:5172465-5175624	2177	7.44533	34.0638	8.78318	6.82008	6.73273	40.7538	30.4391	30.9984	hypothetical protein (1422 nt)	2177	1422	53.59
TCONS_00000868	XLOC_000814	NA	MGG_05427	TSS840	=	MGG_05427T0	supercont8.1:5183733-5185451	1313	88.0614	110.277	101	79.9055	83.279	122.763	100.765	107.302	microtubule-associated protein RP/EB family member 1 (744 nt)	1313	744	61.29
TCONS_00000869	XLOC_000815	NA	MGG_05428	TSS841	=	MGG_05428T0	supercont8.1:5185782-5187600	1818	56.0155	26.5517	52.7709	58.0586	57.2171	24.7305	26.4084	28.5163	V-SNARE (1128 nt)	1818	1128	71.45
TCONS_00000870	XLOC_000816	NA	MGG_13058	TSS842	=	MGG_13058T0	supercont8.1:5190599-5193667	3068	6.10393	11.3761	4.73854	7.07094	6.50233	8.96423	11.8252	13.339	hypothetical protein (2484 nt)	3068	2484	64.05
TCONS_00000871	XLOC_000817	NA	MGG_05432	TSS843	=	MGG_05432T0	supercont8.1:5203706-5204525	738	0.0492192	0.22486	0.147658	0	0	0.0846687	0.168707	0.421204	asparaginyl-tRNA synthetase (738 nt)	738	738	55.42
TCONS_00000872	XLOC_000818	NA	MGG_05435	TSS844	=	MGG_05435T0	supercont8.1:5211597-5215069	2069	0.177057	0.927066	0.1533	0.126547	0.251322	1.21675	0.709415	0.855029	membrane transporter (1695 nt)	2069	1695	60.83
TCONS_00000873	XLOC_000819	NA	MGG_05439	TSS845	=	MGG_05439T0	supercont8.1:5218521-5222580	2080	32.5554	40.5241	35.859	31.1166	30.6906	41.8331	39.69	40.0491	hypothetical protein (1683 nt)	2080	1683	59.48
TCONS_00000875	XLOC_000821	NA	MGG_05442	TSS847	=	MGG_05442T0	supercont8.1:5226766-5228462	1470	1.51691	2.62096	1.52425	1.36408	1.66239	2.79734	2.6243	2.44125	endo alpha-1,4 polygalactosaminidase precusor (939 nt)	1470	939	57.4
TCONS_00000876	XLOC_000822	NA	MGG_13063	TSS848	=	MGG_13063T0	supercont8.1:5229757-5231637	1880	28.8043	6.80696	32.8901	25.9437	27.579	8.21324	6.61091	5.59672	hypothetical protein (972 nt)	1880	972	66.26
TCONS_00000877	XLOC_000823	NA	MGG_05444	TSS849	=	MGG_05444T0	supercont8.1:5233747-5234290	543	0.0752362	0	0	0	0.225709	0	0	0	hypothetical protein (543 nt)	543	543	57.83
TCONS_00000878	XLOC_000824	NA	MGG_05446	TSS850	=	MGG_05446T0	supercont8.1:5247552-5249977	1667	36.6631	17.4871	41.5893	35.1763	33.2236	17.7642	16.8469	17.8503	hypothetical protein (1185 nt)	1667	1185	61.01
TCONS_00000879	XLOC_000825	NA	MGG_05448	TSS851	=	MGG_05448T0	supercont8.1:5251172-5253285	2113	31.5892	31.1781	28.1438	34.5378	32.086	28.0407	32.7691	32.7246	BAG domain-containing protein (1056 nt)	2113	1056	57.86
TCONS_00000880	XLOC_000826	NA	MGG_05449	TSS852	=	MGG_05449T0	supercont8.1:5253555-5255339	1208	1138.98	748.474	1232.57	1085.67	1098.7	807.041	719.924	718.455	60S ribosomal protein L16 (609 nt)	1208	609	61.58
TCONS_00000881	XLOC_000827	NA	MGG_05451	TSS853	=	MGG_05451T0	supercont8.1:5258080-5260729	2472	93.8287	39.7218	99.2138	90.8164	91.4561	42.4461	38.1544	38.5651	1-acyl-sn-glycerol-3-phosphate acyltransferase 2 (1299 nt)	2472	1299	56.81
TCONS_00000882	XLOC_000828	NA	MGG_05452	TSS854	=	MGG_05452T0	supercont8.1:5264204-5264702	498	0	0.826929	0	0	0	0.820305	1.05718	0.603306	hypothetical protein (498 nt)	498	498	63.65
TCONS_00000883	XLOC_000829	NA	MGG_16364	TSS855	=	MGG_16364T0	supercont8.1:5266925-5267652	537	15.0553	20.0402	16.1276	14.3394	14.699	18.6598	20.0754	21.3854	hypothetical protein (537 nt)	537	537	56.24
TCONS_00000884	XLOC_000830	NA	MGG_05454	TSS856	=	MGG_05454T0	supercont8.1:5270186-5272232	1590	114.484	109.392	110.239	115.265	117.947	109.093	109.648	109.434	hypothetical protein (363 nt)	1590	363	59.5
TCONS_00000885	XLOC_000831	NA	MGG_16365	TSS857	=	MGG_16365T0	supercont8.1:5274041-5277019	566	0	0.373481	0	0	0	0.503806	0.370177	0.246458	hypothetical protein (372 nt)	566	372	59.95
TCONS_00000886	XLOC_000832	NA	MGG_16366	TSS858	=	MGG_16366T0	supercont8.1:5277545-5277922	273	0	0.387438	0	0	0	0	0.581505	0.580809	hypothetical protein (273 nt)	273	273	54.21
TCONS_00000887	XLOC_000833	NA	MGG_05456	TSS859	=	MGG_05456T0	supercont8.1:5280886-5281926	960	78.3873	162.179	77.2635	80.8223	77.0761	162.423	160.938	163.174	hypothetical protein (585 nt)	960	585	71.97
TCONS_00000889	XLOC_000835	NA	MGG_16368	TSS861	=	MGG_16368T0	supercont8.1:5282376-5287625	337	1.27757	0.85442	1.60993	1.11522	1.10755	0.313415	1.92879	0.321058	hypothetical protein (240 nt) Note(s): Partial: End of the Contig	337	240	55.42
TCONS_00000890	XLOC_000836	NA	MGG_05459	TSS862	=	MGG_05459T0	supercont8.1:5288485-5293603	4284	5.0283	10.2027	4.8753	5.14201	5.0676	9.34024	10.2154	11.0525	hypothetical protein (2736 nt)	4284	2736	52.56
TCONS_00000893	XLOC_000839	NA	MGG_05462	TSS865	=	MGG_05462T0	supercont8.1:5305697-5307231	1534	40.8763	75.0575	32.4876	46.5232	43.6181	63.1614	79.8973	82.1138	tetratricopeptide repeat domain-containing protein (597 nt)	1534	597	67.17
TCONS_00000894	XLOC_000840	NA	MGG_05464	TSS866	=	MGG_05464T0	supercont8.1:5309106-5312198	3092	4.67437	2.98948	4.91515	4.47481	4.63313	3.35406	2.72211	2.89226	endo-1,4-beta-xylanase (1218 nt)	3092	1218	62.48
TCONS_00000895	XLOC_000841	NA	MGG_05467	TSS867	=	MGG_05467T0	supercont8.1:5317020-5319636	2344	375.253	579.695	446.003	339.404	340.352	695.817	520.294	522.975	sodium/nucleoside cotransporter 1 (1989 nt)	2344	1989	58.22
TCONS_00000896	XLOC_000842	NA	MGG_16371	TSS868	=	MGG_16371T0	supercont8.1:5343655-5344940	1176	2.7237	3.06472	4.35197	1.62735	2.19179	5.50569	1.84756	1.84089	hypothetical protein (621 nt)	1176	621	53.95
TCONS_00000897	XLOC_000842	NA	MGG_16371	TSS868	=	MGG_16371T1	supercont8.1:5343655-5344940	1122	0.711132	3.40535	0.905785	0.921706	0.305904	5.47322	2.84012	1.90271	hypothetical protein, variant (567 nt)	1122	567	54.14
TCONS_00000898	XLOC_000843	NA	MGG_05478	TSS869	=	MGG_05478T0	supercont8.1:5355833-5357450	1471	266.605	124.277	239.069	286.666	274.079	106.08	134.992	131.76	hypothetical protein (720 nt)	1471	720	54.86
TCONS_00000899	XLOC_000844	NA	MGG_05481	TSS870	=	MGG_05481T0	supercont8.1:5362940-5365112	2172	9.84154	16.5417	8.84775	10.0361	10.6408	16.8354	16.6494	16.1405	elongator complex protein 3 (1710 nt)	2172	1710	54.21
TCONS_00000900	XLOC_000845	NA	MGG_13079	TSS871	=	MGG_13079T0	supercont8.1:5367224-5371420	2393	3.37565	4.87082	3.28105	3.5604	3.28549	4.79522	4.85984	4.9574	Ser/Thr protein phosphatase (1920 nt)	2393	1920	53.23
TCONS_00000901	XLOC_000846	NA	MGG_05484	TSS872	=	MGG_05484T0	supercont8.1:5373140-5379762	4115	11.9002	17.4846	14.8799	10.9694	9.85136	21.2451	15.2408	15.9677	AP-2 complex subunit mu-1 (1314 nt)	4115	1314	54.34
TCONS_00000902	XLOC_000847	NA	MGG_16377	TSS873	=	MGG_16377T0	supercont8.1:5385025-5387809	2784	0.0919232	0.041571	0.0932205	0.0915953	0.0909539	0.0539512	0.0177085	0.0530533	hypothetical protein (2373 nt)	2784	2373	60.3
TCONS_00000904	XLOC_000849	NA	MGG_05491	TSS875	=	MGG_05491T0	supercont8.1:5401859-5405288	3200	0	0.00624593	0	0	0	0.0187378	0	0	L-aminoadipate-semialdehyde dehydrogenase (3150 nt)	3200	3150	62.7
TCONS_00000905	XLOC_000850	NA	MGG_13086	TSS876	=	MGG_13086T0	supercont8.1:5416955-5419223	1680	1.84838	6.31365	2.62696	1.54379	1.3744	7.24999	5.83402	5.85695	hypothetical protein (1680 nt)	1680	1680	62.68
TCONS_00000910	XLOC_000855	NA	MGG_05499	TSS881	=	MGG_05499T0	supercont8.1:5438664-5440175	1511	7.03989	11.7276	7.82873	6.90823	6.3827	12.2807	11.0411	11.8609	serine/threonine protein kinase (822 nt)	1511	822	57.91
TCONS_00000911	XLOC_000856	NA	MGG_05501	TSS882	=	MGG_05501T0	supercont8.1:5447688-5450158	2271	0.492082	4.40923	0.489434	0.533083	0.45373	4.73186	3.97495	4.52088	hypothetical protein (2013 nt)	2271	2013	54.89
TCONS_00000912	XLOC_000857	NA	MGG_05503	TSS883	=	MGG_05503T0	supercont8.1:5453385-5454827	1380	13.5391	23.7393	15.9541	12.2086	12.4545	30.2483	19.3778	21.5919	high-affinity nickel-transporter nixA (1185 nt)	1380	1185	64.3
TCONS_00000913	XLOC_000858	NA	MGG_05504	TSS884	=	MGG_05504T0	supercont8.1:5455351-5455747	306	0	0.861173	0	0	0	1.76321	0	0.820314	hypothetical protein (306 nt)	306	306	59.15
TCONS_00000914	XLOC_000859	NA	MGG_05505	TSS885	=	MGG_05505T0	supercont8.1:5456214-5458212	1847	1.24616	5.45365	1.59387	0.909184	1.23544	5.4357	5.24449	5.68076	autophagy protein (1704 nt)	1847	1704	58.86
TCONS_00000915	XLOC_000860	NA	MGG_05506	TSS886	=	MGG_05506T0	supercont8.1:5458879-5460496	1453	17.4294	32.191	17.4673	17.9099	16.911	32.3096	31.7348	32.5288	glyoxylate reductase (1128 nt)	1453	1128	58.95
TCONS_00000916	XLOC_000861	NA	MGG_05507	TSS887	=	MGG_05507T0	supercont8.1:5460702-5462825	2123	5.25387	2.89978	3.74845	6.19111	5.82206	2.04591	3.47154	3.18189	hypothetical protein (1527 nt)	2123	1527	65.36
TCONS_00000918	XLOC_000863	NA	MGG_05514	TSS889	=	MGG_05514T0	supercont8.1:5479385-5481064	1435	0.262384	7.60714	0.533028	0.127508	0.126616	8.93213	7.24485	6.64444	hypothetical protein (1206 nt)	1435	1206	57.79
TCONS_00000919	XLOC_000864	NA	MGG_05519	TSS890	=	MGG_05519T0	supercont8.1:5492467-5494131	1664	2.03083	5.38946	1.96539	1.77586	2.35124	5.56564	5.74151	4.86122	alcohol dehydrogenase (1182 nt)	1664	1182	67.34
TCONS_00000920	XLOC_000865	NA	MGG_16388	TSS891	=	MGG_16388T0	supercont8.1:5500953-5502691	876	9.09948	3.74629	8.31859	10.2174	8.76248	2.76777	4.2384	4.23271	hypothetical protein (330 nt)	876	330	55.45
TCONS_00000921	XLOC_000866	NA	MGG_16389	TSS892	=	MGG_16389T0	supercont8.1:5502926-5510743	3867	9.72737	12.1124	10.8679	8.50287	9.81134	13.0533	11.575	11.7089	hypothetical protein (3231 nt)	3867	3231	56.67
TCONS_00000922	XLOC_000866	NA	MGG_16390	TSS893	=	MGG_16390T0	supercont8.1:5502926-5510743	1775	4.82015	7.19238	4.73663	5.10334	4.62048	7.16758	7.25315	7.15641	hypothetical protein (462 nt)	1775	462	60.61
TCONS_00000923	XLOC_000867	NA	MGG_16391	TSS894	=	MGG_16391T0	supercont8.1:5511315-5511995	680	1.1843	0.344514	0.950874	1.63053	0.971495	0.561907	0.0944277	0.377207	hypothetical protein (339 nt)	680	339	54.57
TCONS_00000924	XLOC_000868	NA	MGG_05528	TSS895	=	MGG_05528T0	supercont8.1:5517020-5518448	1291	59.7273	55.63	53.525	64.4865	61.1705	49.7974	58.5858	58.5067	hob3 (786 nt)	1291	786	56.62
TCONS_00000925	XLOC_000869	NA	MGG_15175	TSS896	=	MGG_15175T0	supercont8.1:5534145-5537983	2276	24.8231	20.6383	24.8093	24.5009	25.1592	21.5394	20.0253	20.3501	hypothetical protein (1263 nt)	2276	1263	57.88
TCONS_00000926	XLOC_000870	NA	MGG_15176	TSS897	=	MGG_15176T0	supercont8.1:5538176-5540950	1492	6.25053	9.36517	6.24158	5.97327	6.53674	8.70687	9.82448	9.56415	cyclin-H (1194 nt)	1492	1194	61.98
TCONS_00000927	XLOC_000871	NA	MGG_16395	TSS898	=	MGG_16395T0	supercont8.1:5541248-5543330	1962	140.593	131.759	144.618	139.803	137.359	135.395	131.663	128.22	ATP-dependent Zn protease (1434 nt)	1962	1434	56.21
TCONS_00000929	XLOC_000873	NA	MGG_15458	TSS900	=	MGG_15458T0	supercont8.1:5554561-5555025	309	0	0.133144	0	0	0	0	0	0.399432	hypothetical protein (309 nt)	309	309	50.49
TCONS_00000931	XLOC_000875	NA	MGG_16398	TSS902	=	MGG_16398T0	supercont8.1:5558974-5560863	1889	0.146778	0.239669	0.161322	0.139996	0.139016	0.205255	0.216487	0.297267	hypothetical protein (1710 nt)	1889	1710	58.83
TCONS_00000934	XLOC_000878	NA	MGG_05551	TSS905	=	MGG_05551T0	supercont8.1:5603729-5605260	1488	0.0203801	1.36972	0	0.0611404	0	1.59376	1.41797	1.09744	hypothetical protein (1488 nt)	1488	1488	57.59
TCONS_00000935	XLOC_000879	NA	MGG_13110	TSS906	=	MGG_13110T0	supercont8.1:5608933-5611108	2175	0.934568	0.463278	0.854147	0.998095	0.951464	0.395023	0.416761	0.57805	hypothetical protein (1884 nt)	2175	1884	66.56
TCONS_00000936	XLOC_000880	NA	MGG_05553	TSS907	=	MGG_05553T0	supercont8.1:5611772-5613589	1446	0	0.075131	0	0	0	0.042398	0.0366387	0.146356	hypothetical protein (1446 nt)	1446	1446	53.67
TCONS_00000937	XLOC_000881	NA	MGG_05555	TSS908	=	MGG_05555T0	supercont8.1:5616054-5618140	1482	5.6792	4.69892	6.44709	5.46687	5.12365	5.37719	4.34495	4.37464	xenobiotic compound monooxygenase (1446 nt)	1482	1446	58.16
TCONS_00000938	XLOC_000882	NA	MGG_16402	TSS909	=	MGG_16402T0	supercont8.1:5620908-5621906	807	61.9114	78.8642	57.9966	66.41	61.3277	80.4007	80.6169	75.5751	hypothetical protein (807 nt)	807	807	54.89
TCONS_00000939	XLOC_000883	NA	MGG_15150	TSS910	=	MGG_15150T0	supercont8.1:5631874-5632201	327	2.69358	8.99086	2.69783	2.99966	2.38324	7.97227	8.98794	10.0124	hypothetical protein (327 nt)	327	327	54.74
TCONS_00000942	XLOC_000886	NA	MGG_05564	TSS913	=	MGG_05564T0	supercont8.1:5669025-5669881	753	0.180297	0	0.257468	0.283423	0	0	0	0	hypothetical protein (753 nt)	753	753	66.27
TCONS_00000943	XLOC_000887	NA	MGG_05565	TSS914	=	MGG_05565T0	supercont8.1:5670333-5671468	1135	4.06142	15.5188	5.47569	3.86891	2.83964	19.2747	12.7731	14.5086	hypothetical protein (714 nt)	1135	714	63.73
TCONS_00000944	XLOC_000888	NA	MGG_13116	TSS915	=	MGG_13116T0	supercont8.1:5672973-5679499	1409	0.621263	0.233794	0.629244	0.846558	0.387986	0.210878	0.264283	0.226222	hypothetical protein (1332 nt)	1409	1332	64.41
TCONS_00000945	XLOC_000889	NA	MGG_13118	TSS916	=	MGG_13118T0	supercont8.1:5672973-5679499	770	0.828765	0.450265	0.841813	0.82512	0.819362	0.395356	0.557651	0.397789	hypothetical protein (555 nt)	770	555	57.48
TCONS_00000946	XLOC_000890	NA	MGG_05567	TSS917	=	MGG_05567T0	supercont8.1:5679548-5680663	1115	12.8425	9.95546	13.0982	12.1169	13.3123	8.6612	10.5102	10.695	hypothetical protein (741 nt)	1115	741	50.07
TCONS_00000947	XLOC_000891	NA	MGG_05568	TSS918	=	MGG_05568T0	supercont8.1:5680751-5683799	1281	134.362	84.6606	124.387	138.387	140.311	76.1786	88.8352	88.9681	hypothetical protein (717 nt)	1281	717	60.81
TCONS_00000948	XLOC_000892	NA	MGG_05570	TSS919	=	MGG_05570T0	supercont8.1:5684009-5685054	976	9.0434	15.1954	10.1849	8.09882	8.84647	15.626	15.3713	14.589	hypothetical protein (627 nt)	976	627	63
TCONS_00000949	XLOC_000893	NA	MGG_05572	TSS920	=	MGG_05572T0	supercont8.1:5688049-5694792	2901	0.61106	1.1485	0.580765	0.730288	0.522126	1.04136	1.10129	1.30284	hypothetical protein (1674 nt)	2901	1674	51.43
TCONS_00000950	XLOC_000894	NA	MGG_05579	TSS921	=	MGG_05579T0	supercont8.1:5704981-5706495	1514	1.31488	5.61165	1.43574	1.31857	1.19031	6.72944	4.96935	5.13615	hypothetical protein (972 nt)	1514	972	74.18
TCONS_00000951	XLOC_000895	NA	MGG_05582	TSS922	=	MGG_05582T0	supercont8.1:5714150-5714951	801	0.125269	0.75852	0.245326	0.130482	0	1.06718	0.377967	0.830414	hypothetical protein (801 nt)	801	801	71.04
TCONS_00000952	XLOC_000896	NA	MGG_15154	TSS923	=	MGG_15154T0	supercont8.1:5716844-5719976	492	112.442	629.107	135.878	99.616	101.833	778.279	561.738	547.305	hypothetical protein (213 nt)	492	213	52.58
TCONS_00000953	XLOC_000897	NA	MGG_13121	TSS924	=	MGG_13121T0	supercont8.1:5721495-5724233	2184	57.7249	76.9839	62.5679	54.4481	56.1586	82.3186	75.0234	73.6097	hypothetical protein (1356 nt)	2184	1356	61.21
TCONS_00000958	XLOC_000902	NA	MGG_05592	TSS929	=	MGG_05592T0	supercont8.1:5761733-5763376	1626	0.619111	1.69952	0.866434	0.497189	0.49371	1.86536	1.72973	1.50347	hypothetical protein (1626 nt)	1626	1626	67.59
TCONS_00000959	XLOC_000903	NA	MGG_05593	TSS930	=	MGG_05593T0	supercont8.1:5766499-5767507	768	0	0.0266117	0	0	0	0	0	0.0798351	hypothetical protein (768 nt)	768	768	61.33
TCONS_00000961	XLOC_000905	NA	MGG_13129	TSS932	=	MGG_13129T0	supercont8.1:5776553-5778868	2229	6.74674	10.7014	7.96231	6.33479	5.94312	11.4272	10.6609	10.0162	hypothetical protein (1863 nt)	2229	1863	58.24
TCONS_00000962	XLOC_000906	NA	MGG_05595	TSS933	=	MGG_05595T0	supercont8.1:5781398-5787022	4488	0.649302	1.01435	0.791806	0.607603	0.548497	1.24993	0.897171	0.89595	spermidine/putrescine import ATP-binding protein potA (4488 nt)	4488	4488	62.03
TCONS_00000963	XLOC_000907	NA	MGG_05596	TSS934	=	MGG_05596T0	supercont8.1:5788331-5791532	3047	7.20805	5.15327	6.04881	7.56646	8.00887	4.32712	5.33718	5.7955	hydrolase (2880 nt)	3047	2880	59.93
TCONS_00000964	XLOC_000908	NA	MGG_05599	TSS935	=	MGG_05599T0	supercont8.1:5802745-5806431	3581	7.48131	4.15319	7.23035	7.587	7.62659	4.08371	3.94044	4.43542	beta-glucosidase 1 (2304 nt)	3581	2304	66.41
TCONS_00000965	XLOC_000909	NA	MGG_16417	TSS936	=	MGG_16417T0	supercont8.1:5812742-5816026	2087	38.8793	44.7799	45.1084	36.057	35.4727	48.7216	42.257	43.3612	hypothetical protein (1689 nt)	2087	1689	58.91
TCONS_00000966	XLOC_000910	NA	MGG_15156	TSS937	=	MGG_15156T0	supercont8.1:5816159-5825638	8640	16.9157	21.6578	17.3553	17.0344	16.3574	22.0304	21.8009	21.1422	phosphatidylinositol 3-kinase tor2 (7383 nt)	8640	7383	54.61
TCONS_00000968	XLOC_000912	NA	MGG_05607	TSS939	=	MGG_05607T0	supercont8.1:5834058-5836772	2529	9.57426	11.1243	9.82673	8.97498	9.92106	10.7015	10.9213	11.75	cytochrome c heme lyase (969 nt)	2529	969	66.56
TCONS_00000969	XLOC_000913	NA	MGG_05609	TSS940	=	MGG_05609T0	supercont8.1:5837509-5839771	2262	11.4916	10.229	11.3048	11.5494	11.6205	10.0304	10.0693	10.5873	hypothetical protein (1698 nt)	2262	1698	56.36
TCONS_00000970	XLOC_000914	NA	MGG_16420	TSS941	=	MGG_16420T0	supercont8.1:5843231-5843806	393	0	0.45372	0	0	0	0.668902	0.461705	0.230554	hypothetical protein (393 nt)	393	393	54.96
TCONS_00000971	XLOC_000915	NA	MGG_16421	TSS942	=	MGG_16421T0	supercont8.1:5844145-5844960	291	1.34715	0.1581	0.750895	1.65091	1.63965	0	0.4743	0	hypothetical protein (291 nt)	291	291	56.7
TCONS_00000972	XLOC_000916	NA	MGG_05611	TSS943	=	MGG_05611T0	supercont8.1:5847211-5847665	243	0	0.903751	0	0	0	0	0.904463	1.80679	hypothetical protein (243 nt)	243	243	55.14
TCONS_00000973	XLOC_000917	NA	MGG_05612	TSS944	=	MGG_05612T0	supercont8.1:5851753-5852548	631	0	0.0338461	0	0	0	0.101538	0	0	hypothetical protein (327 nt)	631	327	58.72
TCONS_00000974	XLOC_000918	NA	MGG_05615	TSS945	=	MGG_05615T0	supercont8.1:5859836-5862790	2782	1.6865	4.48791	1.9232	1.58888	1.54741	4.75091	3.95204	4.76079	origin recognition complex subunit 1 (2358 nt)	2782	2358	58.78
TCONS_00000976	XLOC_000920	NA	MGG_05617	TSS947	=	MGG_05617T0	supercont8.1:5866024-5871062	1084	25.4306	23.7146	26.3765	28.0139	21.9013	22.5675	24.3817	24.1944	ankyrin repeat domain-containing protein (729 nt)	1084	729	56.65
TCONS_00000977	XLOC_000921	NA	MGG_16424	TSS948	=	MGG_16424T0	supercont8.1:5871216-5876050	2281	0.945515	2.28773	1.37908	0.58161	0.875856	3.28771	1.57557	1.9999	hypothetical protein (936 nt)	2281	936	52.14
TCONS_00000979	XLOC_000921	NA	MGG_16425	TSS949	=	MGG_16425T0	supercont8.1:5871216-5876050	1994	7.22962	2.93603	7.92349	6.45036	7.31501	3.42058	2.57482	2.8127	hypothetical protein (1752 nt)	1994	1752	58.11
TCONS_00000980	XLOC_000922	NA	MGG_05621	TSS950	=	MGG_05621T0	supercont8.1:5876504-5877655	802	52.3209	33.5425	57.4106	47.9383	51.6138	35.3899	32.98	32.2575	hypothetical protein (363 nt)	802	363	52.62
TCONS_00000981	XLOC_000923	NA	MGG_05622	TSS951	=	MGG_05622T0	supercont8.1:5879688-5883816	2292	158.753	233.381	157.445	161.075	157.739	229.907	233.224	237.012	hypothetical protein (1461 nt)	2292	1461	60.1
TCONS_00000982	XLOC_000924	NA	MGG_05625	TSS952	=	MGG_05625T0	supercont8.1:5886169-5888599	2333	21.2735	14.3936	27.0903	17.4758	19.2543	19.9168	11.9137	11.3503	transmembrane protein 56 (1053 nt)	2333	1053	54.42
TCONS_00000983	XLOC_000924	NA	MGG_05625	TSS952	=	MGG_05625T1	supercont8.1:5886169-5888599	2090	36.4851	46.5838	33.2056	40.6443	35.6055	47.2021	44.8366	47.7125	transmembrane protein 56, variant (1053 nt)	2090	1053	54.42
TCONS_00000984	XLOC_000925	NA	MGG_05627	TSS953	=	MGG_05627T0	supercont8.1:5895746-5896832	1029	41.1482	44.7341	38.4427	39.8159	45.186	40.916	46.3725	46.9136	hypothetical protein (1029 nt)	1029	1029	57.73
TCONS_00000985	XLOC_000926	NA	MGG_16427	TSS954	=	MGG_16427T0	supercont8.1:5899104-5906195	6156	0.955366	1.24386	1.04273	0.901674	0.92169	1.09495	1.29231	1.34432	hypothetical protein (6156 nt)	6156	6156	55.47
TCONS_00000987	XLOC_000928	NA	MGG_05637	TSS956	=	MGG_05637T0	supercont8.1:5923637-5927052	2804	74.9711	76.7485	71.3371	75.8351	77.741	70.0027	80.2724	79.9704	protein phosphatase PP2A regulatory subunit B (1446 nt)	2804	1446	52.63
TCONS_00000988	XLOC_000929	NA	MGG_13140	TSS957	=	MGG_13140T0	supercont8.1:5927770-5928776	945	0	0.0154863	0	0	0	0.0464589	0	0	hypothetical protein (945 nt)	945	945	66.03
TCONS_00000989	XLOC_000930	NA	MGG_16430	TSS958	=	MGG_16430T0	supercont8.1:5948707-5949083	207	0	2.1576	0	0	0	4.41711	2.05568	0	hypothetical protein (207 nt)	207	207	56.04
TCONS_00000990	XLOC_000931	NA	MGG_05643	TSS959	=	MGG_05643T0	supercont8.1:5949268-5955726	6387	8.03442	11.1666	8.8651	7.50594	7.73222	12.4535	10.3897	10.6566	hypothetical protein (6387 nt)	6387	6387	53.41
TCONS_00000991	XLOC_000932	NA	MGG_05644	TSS960	=	MGG_05644T0	supercont8.1:5960165-5962304	2139	147.667	183.078	131.207	154.602	157.194	170.062	185.873	193.299	hypothetical protein (297 nt)	2139	297	62.96
TCONS_00000993	XLOC_000934	NA	MGG_05645	TSS962	=	MGG_05645T0	supercont8.1:5965503-5969868	1067	0.0302225	0.0525276	0	0.0906675	0	0	0.105102	0.0524804	hypothetical protein (594 nt)	1067	594	60.27
TCONS_00000994	XLOC_000935	NA	MGG_05647	TSS963	=	MGG_05647T0	supercont8.1:5970607-5972482	1708	27.0931	20.583	28.1788	25.7063	27.3943	21.7553	19.1476	20.8462	50S ribosomal protein L2 (1167 nt)	1708	1167	58.01
TCONS_00000995	XLOC_000936	NA	MGG_05648	TSS964	=	MGG_05648T0	supercont8.1:5972612-5973493	881	13.099	41.2948	16.5439	13.0244	9.72868	44.663	39.2703	39.9513	hypothetical protein (654 nt)	881	654	61.62
TCONS_00000996	XLOC_000937	NA	MGG_16432	TSS965	=	MGG_16432T0	supercont8.1:5973700-5975883	2183	4.8989	5.96829	6.29115	4.97039	3.43517	7.74217	5.09632	5.06638	hypothetical protein (1713 nt)	2183	1713	56.8
TCONS_00000997	XLOC_000938	NA	MGG_16433	TSS966	=	MGG_16433T0	supercont8.1:5976386-5976915	434	0.300119	0.531365	0.569297	0.33106	0	0.829163	0.382715	0.382216	hypothetical protein (153 nt)	434	153	54.9
TCONS_00000998	XLOC_000939	NA	MGG_05650	TSS967	=	MGG_05650T0	supercont8.1:5978131-5981022	2683	15.0343	18.484	15.0203	15.8857	14.197	17.4254	19.1827	18.8438	PAP2 domain-containing protein (1458 nt)	2683	1458	55.9
TCONS_00000999	XLOC_000940	NA	MGG_16434	TSS968	=	MGG_16434T0	supercont8.1:5983798-5989432	772	4.5233	2.43769	5.78904	3.42608	4.35478	2.94924	2.46105	1.90277	hypothetical protein (162 nt)	772	162	53.09
TCONS_00001000	XLOC_000941	NA	MGG_05654	TSS969	=	MGG_05654T0	supercont8.1:5990550-5993726	3176	8.88054	6.7058	8.17417	8.88303	9.58441	6.25382	6.89039	6.97318	hypothetical protein (1866 nt)	3176	1866	58.15
TCONS_00001001	XLOC_000942	NA	MGG_05655	TSS970	=	MGG_05655T0	supercont8.1:5994429-5995680	1074	0.0550218	0.193624	0.0757487	0	0.0893166	0.268494	0	0.312377	hypothetical protein (1074 nt)	1074	1074	60.8
TCONS_00001002	XLOC_000943	NA	MGG_05658	TSS971	=	MGG_05658T0	supercont8.1:6003060-6007018	1543	12.7962	17.529	13.144	12.4328	12.8117	19.2522	16.6617	16.6731	hypothetical protein (477 nt)	1543	477	54.93
TCONS_00001003	XLOC_000944	NA	MGG_16435	TSS972	=	MGG_16435T0	supercont8.1:6007092-6012223	252	0	0.519227	0	0	0	0	0.779296	0.778385	hypothetical protein (252 nt)	252	252	48.02
TCONS_00001005	XLOC_000946	NA	MGG_16439	TSS974	=	MGG_16439T0	supercont8.1:6021953-6023505	1165	1.40535	1.67008	1.53322	1.7116	0.971221	2.0353	1.84257	1.13236	hypothetical protein (378 nt)	1165	378	52.38
TCONS_00001006	XLOC_000947	NA	MGG_05661	TSS975	=	MGG_05661T0	supercont8.1:6025167-6028054	1036	3144.23	2169.86	3135.08	3174.45	3123.15	2179.33	2163.23	2167.01	40S ribosomal protein S18 (471 nt)	1036	471	56.69
TCONS_00001007	XLOC_000948	NA	CPYA	TSS976	=	MGG_05663T0	supercont8.1:6028703-6031237	2452	936.994	226.114	1024.09	901.888	885.001	246.809	215.192	216.34	carboxypeptidase Y (1659 nt)	2452	1659	59.01
TCONS_00001008	XLOC_000949	NA	MGG_05668	TSS977	=	MGG_05668T0	supercont8.1:6057104-6058074	758	243.158	244.436	243.384	243.825	242.264	239.371	249.776	244.161	hypothetical protein (513 nt)	758	513	58.87
TCONS_00001009	XLOC_000950	NA	MGG_16441	TSS978	=	MGG_16441T0	supercont8.1:6062447-6067773	3955	47.3183	58.8546	38.9296	50.7266	52.2986	40.4721	72.4876	63.6041	hypothetical protein (2754 nt)	3955	2754	56.25
TCONS_00001011	XLOC_000950	NA	MGG_16442	TSS979	=	MGG_16442T0	supercont8.1:6062447-6067773	1093	12.3704	11.509	9.81883	13.2638	14.0285	2.61898	18.8755	13.0327	hypothetical protein (831 nt)	1093	831	61.25
TCONS_00001012	XLOC_000951	NA	MGG_05673	TSS980	=	MGG_05673T0	supercont8.1:6076188-6078103	1736	414.462	266.641	487.23	378.639	377.518	303.43	250.258	246.235	40S ribosomal protein S3 (789 nt)	1736	789	63.5
TCONS_00001013	XLOC_000952	NA	MGG_05676	TSS981	=	MGG_05676T0	supercont8.1:6086649-6088955	1983	78.2231	109.117	85.2248	75.5575	73.8872	108.646	110.759	107.947	coatomer subunit delta (1545 nt)	1983	1545	55.28
TCONS_00001014	XLOC_000953	NA	MGG_05679	TSS982	=	MGG_05679T0	supercont8.1:6096933-6097604	441	319.271	286.045	294.338	334.495	328.981	257.98	302.689	297.466	hypothetical protein (228 nt)	441	228	54.39
TCONS_00001015	XLOC_000954	NA	MGG_05681	TSS983	=	MGG_05681T0	supercont8.1:6099114-6102778	1568	8.93045	9.73861	10.2643	8.69417	7.8329	10.8664	9.44785	8.90163	hypothetical protein (1083 nt)	1568	1083	59.65
TCONS_00001016	XLOC_000955	NA	MGG_05683	TSS984	=	MGG_05683T0	supercont8.1:6106829-6111943	4700	32.7546	8.34925	32.9403	33.1263	32.1973	8.40765	8.40708	8.23301	hypothetical protein (3003 nt)	4700	3003	53.68
TCONS_00001017	XLOC_000956	NA	MGG_05686	TSS985	=	MGG_05686T0	supercont8.1:6117870-6120070	1905	27.5977	24.1792	36.3584	23.2067	23.2279	31.1745	20.6688	20.6944	dolichyl pyrophosphate Glc1Man9GlcNAc2 alpha-1,3-glucosyltransferase (1509 nt)	1905	1509	51.82
TCONS_00001018	XLOC_000957	NA	MGG_05687	TSS986	=	MGG_05687T0	supercont8.1:6121061-6127668	4771	7.93653	6.80692	8.04096	8.1358	7.63284	6.95262	6.87383	6.5943	hypothetical protein (3177 nt)	4771	3177	54.36
TCONS_00001019	XLOC_000958	NA	MGG_05689	TSS987	=	MGG_05689T0	supercont8.1:6128220-6129997	1708	90.5766	47.3908	80.706	94.9881	96.0356	43.0488	48.8688	50.2549	hypothetical protein (1326 nt)	1708	1326	56.03
TCONS_00001020	XLOC_000959	NA	MGG_05690	TSS988	=	MGG_05690T0	supercont8.1:6133087-6136687	3450	555.063	260.736	575.872	545.278	544.039	270.803	255.265	256.142	hypothetical protein (1854 nt)	3450	1854	57.87
TCONS_00001022	XLOC_000961	NA	MGG_05692	TSS990	=	MGG_05692T0	supercont8.1:6138094-6138918	705	4.1463	36.9954	4.86821	3.72134	3.84936	38.9182	38.167	33.9009	hypothetical protein (705 nt)	705	705	60.14
TCONS_00001023	XLOC_000962	NA	MGG_05693	TSS991	=	MGG_05693T0	supercont8.1:6139566-6142495	2633	12.5804	8.9931	12.116	13.3907	12.2345	8.75018	9.60935	8.61977	MIF domain-containing protein (1179 nt)	2633	1179	57.34
TCONS_00001024	XLOC_000963	NA	MGG_05694	TSS992	=	MGG_05694T1	supercont8.1:6142926-6150907	2470	18.9527	24.9512	22.0439	17.4169	17.3973	27.6743	22.7487	24.4307	Gtr1/RagA G domain-containing protein, variant (1077 nt)	2470	1077	53.95
TCONS_00001025	XLOC_000963	NA	MGG_05694	TSS993	=	MGG_05694T0	supercont8.1:6142926-6150907	1931	2.19245	2.55751	2.56314	1.67307	2.34114	2.91797	2.4859	2.26867	Gtr1/RagA G domain-containing protein (1185 nt)	1931	1185	53.25
TCONS_00001026	XLOC_000964	NA	MGG_05699	TSS994	=	MGG_05699T0	supercont8.1:6158536-6170251	3971	19.6225	26.1515	20.4664	18.9447	19.4564	27.7691	25.1354	25.5499	hypothetical protein (3357 nt)	3971	3357	57.55
TCONS_00001027	XLOC_000965	NA	LSM6	TSS995	=	MGG_05701T0	supercont8.1:6170425-6172650	740	209.65	85.0182	218.758	205.307	204.884	88.4187	85.8933	80.7425	U6 snRNA-associated Sm-like protein LSm6 (252 nt)	740	252	51.98
TCONS_00001028	XLOC_000966	NA	MGG_05705	TSS996	=	MGG_05705T0	supercont8.1:6179575-6180393	723	1.29725	0.492873	1.05663	1.3479	1.48723	0.698592	0.260241	0.519786	hypothetical protein (501 nt)	723	501	67.47
TCONS_00001029	XLOC_000967	NA	MGG_05709	TSS997	=	MGG_05709T0	supercont8.1:6195334-6200452	4239	49.4729	75.9772	41.1423	53.0282	54.2483	63.8659	83.0518	81.014	hypothetical protein (1611 nt)	4239	1611	54.38
TCONS_00001030	XLOC_000968	NA	MGG_05713	TSS998	=	MGG_05713T0	supercont8.1:6207934-6210154	2220	31.8241	46.4691	30.54	33.7666	31.1656	44.4101	47.8816	47.1158	ethanolamine kinase (1350 nt)	2220	1350	59.56
TCONS_00001032	XLOC_000970	NA	MGG_16450	TSS1000	=	MGG_16450T0	supercont8.1:6226422-6226767	292	0.270451	0.463793	0	0	0.811352	0.9225	0	0.46888	hypothetical protein (234 nt)	292	234	56.41
TCONS_00001033	XLOC_000971	NA	MGG_05716	TSS1001	=	MGG_05716T0	supercont8.1:6227955-6228759	715	1.96723	1.37543	1.95949	2.28109	1.66113	0.957537	1.58544	1.58332	hypothetical protein (528 nt)	715	528	59.47
TCONS_00001034	XLOC_000972	NA	MGG_05717	TSS1002	=	MGG_05717T0	supercont8.1:6229523-6231924	2323	10.338	15.4922	10.6949	9.76961	10.5496	15.9922	14.8866	15.5979	hypothetical protein (1401 nt)	2323	1401	56.1
TCONS_00001035	XLOC_000973	NA	MGG_05718	TSS1003	=	MGG_05718T0	supercont8.1:6232140-6234862	2436	116.134	129.29	113.677	116.932	117.794	125.17	129.026	133.672	hypothetical protein (1257 nt)	2436	1257	57.84
TCONS_00001036	XLOC_000974	NA	MGG_05719	TSS1004	=	MGG_05719T0	supercont8.1:6235438-6236161	723	3197.01	253.038	2960.45	3318.24	3312.35	230.738	269.957	258.42	heat shock protein 30 (723 nt)	723	723	61
TCONS_00001037	XLOC_000975	NA	CLF1	TSS1005	=	MGG_05720T0	supercont8.1:6238919-6243375	2668	9.87762	13.4701	10.107	9.87689	9.64903	13.5469	13.5334	13.3299	pre-mRNA-splicing factor CLF1 (2076 nt)	2668	2076	58.43
TCONS_00001038	XLOC_000976	NA	MGG_13156	TSS1006	=	MGG_13156T0	supercont8.1:6258749-6261049	2204	127.877	60.8619	103.227	137.362	143.042	52.5363	64.4873	65.562	hypothetical protein (921 nt)	2204	921	58.31
TCONS_00001039	XLOC_000977	NA	MGG_05722	TSS1007	=	MGG_05722T0	supercont8.1:6268280-6271815	2722	20.9039	52.8057	23.405	19.6757	19.6311	60.9098	49.7295	47.7777	hypothetical protein (1956 nt)	2722	1956	52.4
TCONS_00001040	XLOC_000978	NA	MGG_05723	TSS1008	=	MGG_05723T0	supercont8.1:6274062-6276829	2485	10.0957	5.61702	10.8894	9.35456	10.0432	5.58788	5.32531	5.93786	fluconazole resistance protein 1 (1845 nt)	2485	1845	61.73
TCONS_00001041	XLOC_000979	NA	MGG_05724	TSS1009	=	MGG_05724T0	supercont8.1:6277089-6280685	2750	7.34212	6.26197	7.04352	7.45608	7.52676	6.62794	6.1907	5.96726	hypothetical protein (2142 nt)	2750	2142	61.25
TCONS_00001042	XLOC_000980	NA	MGG_13163	TSS1010	=	MGG_13163T0	supercont8.1:6284345-6289627	4001	6.53989	5.07319	8.02695	6.27204	5.3207	5.60057	4.80676	4.81225	hypothetical protein (945 nt)	4001	945	54.6
TCONS_00001043	XLOC_000981	NA	MGG_05727	TSS1011	=	MGG_05727T0	supercont8.1:6290889-6295817	4863	40.3814	40.4707	38.9581	40.4191	41.7669	37.5534	42.2769	41.5818	ankyrin repeat protein (4863 nt)	4863	4863	55.87
TCONS_00001044	XLOC_000982	NA	MGG_16455	TSS1012	=	MGG_16455T0	supercont8.1:6296506-6301094	2488	20.3544	17.405	19.3675	19.6844	22.0113	16.8498	17.9144	17.4509	hypothetical protein (2028 nt)	2488	2028	59.37
TCONS_00001045	XLOC_000983	NA	MGG_05732	TSS1013	=	MGG_05732T0	supercont8.1:6319049-6320896	1576	5.64859	4.43903	4.96303	6.52578	5.45695	4.19599	4.31487	4.80623	hypothetical protein (702 nt)	1576	702	54.13
TCONS_00001046	XLOC_000984	NA	MGG_05734	TSS1014	=	MGG_05734T0	supercont8.1:6322454-6329822	1768	71.9184	76.4457	69.1659	74.4785	72.1109	76.3891	76.2054	76.7425	phospho-2-dehydro-3-deoxyheptonate aldolase (1113 nt)	1768	1113	60.47
TCONS_00001047	XLOC_000985	NA	MGG_05737	TSS1015	=	MGG_05737T0	supercont8.1:6331750-6332193	330	242.726	313.042	247.709	235.217	245.251	314.119	322.498	302.509	hypothetical protein (330 nt)	330	330	59.39
TCONS_00001048	XLOC_000986	NA	MGG_05739	TSS1016	=	MGG_05739T0	supercont8.1:6338975-6345172	3444	7.34945	12.1582	8.22952	6.90945	6.90938	13.4174	11.3601	11.697	hypothetical protein (1488 nt)	3444	1488	59.07
TCONS_00001049	XLOC_000987	NA	MGG_16459	TSS1017	=	MGG_16459T0	supercont8.1:6357918-6361636	898	311.582	249.456	339.218	300.68	294.847	252.128	248.091	248.149	ATP synthase subunit delta (495 nt)	898	495	60.61
TCONS_00001052	XLOC_000988	NA	MGG_05746	TSS1019	=	MGG_05746T0	supercont8.1:6367918-6374160	5943	5.02529	6.3782	6.03016	4.7717	4.274	7.99781	5.61603	5.52075	multidrug resistance protein 1 (4881 nt)	5943	4881	54.15
TCONS_00001053	XLOC_000989	NA	MGG_05747	TSS1020	=	MGG_05747T0	supercont8.1:6375020-6376053	946	7.90162	8.87544	6.08169	8.52773	9.09544	8.39737	8.35848	9.87047	hypothetical protein (537 nt)	946	537	59.78
TCONS_00001054	XLOC_000990	NA	MGG_05748	TSS1021	=	MGG_05748T0	supercont8.1:6379664-6381490	1232	36.1369	55.9564	28.7988	39.1099	40.5019	46.1062	60.9447	60.8183	hypothetical protein (918 nt)	1232	918	65.25
TCONS_00001055	XLOC_000991	NA	MGG_05750	TSS1022	=	MGG_05750T0	supercont8.1:6390924-6392489	1460	4.43476	5.95024	3.71343	4.87453	4.71632	4.59718	7.42784	5.82569	hypothetical protein (933 nt)	1460	933	61.84
TCONS_00001056	XLOC_000992	NA	MGG_16465	TSS1023	=	MGG_16465T0	supercont8.1:6404562-6407109	2387	1.20675	2.65192	1.10498	1.22611	1.28915	2.48019	2.46794	3.00764	hypothetical protein (2295 nt)	2387	2295	52.29
TCONS_00001057	XLOC_000993	NA	MGG_16466	TSS1024	=	MGG_16466T0	supercont8.1:6407279-6410410	597	4.99412	7.3697	5.96661	4.13152	4.88422	6.28741	8.76972	7.05196	hypothetical protein (321 nt)	597	321	52.02
TCONS_00001058	XLOC_000994	NA	MGG_13176	TSS1025	=	MGG_13176T0	supercont8.1:6410601-6417995	5891	13.5729	8.07895	15.3392	13.4189	11.9607	8.37291	7.84888	8.01506	hypothetical protein (5601 nt)	5891	5601	53.95
TCONS_00001059	XLOC_000995	NA	MGG_05757	TSS1026	=	MGG_05757T0	supercont8.1:6418160-6420678	1553	10.2666	20.6897	10.7874	9.89627	10.1161	22.6721	19.5431	19.8537	hypothetical protein (1089 nt)	1553	1089	66.48
TCONS_00001060	XLOC_000996	NA	MGG_16467	TSS1027	=	MGG_16467T0	supercont8.1:6420847-6422411	1172	2.34249	3.72264	2.1892	2.42762	2.41065	3.10445	4.69072	3.37276	hypothetical protein (321 nt)	1172	321	53.27
TCONS_00001061	XLOC_000997	NA	MGG_13177	TSS1028	=	MGG_13177T0	supercont8.1:6424592-6426922	2248	41.7573	126.687	43.7718	41.4303	40.0697	130.045	123.174	126.843	hypothetical protein (771 nt)	2248	771	62.13
TCONS_00001062	XLOC_000998	NA	MGG_16468	TSS1029	=	MGG_16468T0	supercont8.1:6428359-6428866	249	1.13335	0.853641	3.40004	0	0	0.926898	0.817488	0.816537	hypothetical protein (249 nt)	249	249	54.62
TCONS_00001063	XLOC_000999	NA	MGG_05759	TSS1030	=	MGG_05759T0	supercont8.1:6431402-6433385	1723	1.24407	2.68609	1.51663	0.931242	1.28434	2.48225	2.69996	2.87605	molybdenum cofactor sulfurase (1704 nt)	1723	1704	61.27
TCONS_00001064	XLOC_001000	NA	MGG_13178	TSS1031	=	MGG_13178T0	supercont8.1:6435507-6440358	4504	6.49765	6.28593	7.13491	6.34697	6.01106	6.82046	5.99085	6.04647	hypothetical protein (1278 nt)	4504	1278	60.17
TCONS_00001065	XLOC_001001	NA	MGG_13179	TSS1032	=	MGG_13179T0	supercont8.1:6440912-6442349	1437	0.83005	1.62311	0.332232	1.27303	0.884888	1.25473	2.14043	1.47417	hypothetical protein (1437 nt)	1437	1437	61.17
TCONS_00001066	XLOC_001002	NA	MGG_05765	TSS1033	=	MGG_05765T0	supercont8.1:6445442-6446411	969	3.36387	4.75847	3.17317	2.96238	3.95606	5.34155	5.03195	3.9019	hypothetical protein (969 nt)	969	969	62.54
TCONS_00001067	XLOC_001003	NA	MGG_05766	TSS1034	=	MGG_05766T0	supercont8.1:6446998-6448010	864	479.951	175.788	465.981	484.46	489.411	165.059	184.969	177.335	hypothetical protein (864 nt)	864	864	61.11
TCONS_00001068	XLOC_001004	NA	MGG_05768	TSS1035	=	MGG_05768T0	supercont8.1:6451169-6453851	2682	6.19769	8.97123	6.90613	5.81649	5.87045	10.0755	8.71955	8.11861	hypothetical protein (2682 nt)	2682	2682	54.36
TCONS_00001071	XLOC_001007	NA	MGG_10604	TSS1038	=	MGG_10604T0	supercont8.1:6489365-6490142	518	337.622	229.222	304.12	361.711	347.037	198.444	242.436	246.786	hypothetical protein (198 nt)	518	198	57.58
TCONS_00001072	XLOC_001008	NA	MGG_10607	TSS1039	=	MGG_10607T0	supercont8.1:6497007-6499221	1921	658.504	472.53	752.738	613.215	609.56	511.387	454.405	451.8	enolase (1317 nt)	1921	1317	58.85
TCONS_00001073	XLOC_001009	NA	MGG_15171	TSS1040	=	MGG_15171T0	supercont8.1:6510324-6511115	504	0	0.0493013	0	0	0	0	0	0.147904	hypothetical protein (504 nt)	504	504	56.94
TCONS_00001075	XLOC_001011	NA	MGG_16473	TSS1042	=	MGG_16473T0	supercont8.1:6513398-6514646	858	0	0.0165715	0	0	0	0.0497144	0	0	hypothetical protein (858 nt)	858	858	50.7
TCONS_00001076	XLOC_001012	NA	MGG_10614	TSS1043	=	MGG_10614T0	supercont8.1:6534778-6535819	774	0	0.0830974	0	0	0	0.0911688	0.0791146	0.0790087	isoflavone reductase (774 nt)	774	774	52.58
TCONS_00001078	XLOC_001014	NA	MGG_10618	TSS1045	=	MGG_10618T0	supercont8.1:6541242-6542417	1104	0.0869759	0.217385	0	0.260928	0	0.249117	0.201655	0.201383	acetyl xylan esterase (1104 nt)	1104	1104	64.67
TCONS_00001079	XLOC_001015	NA	MGG_15172	TSS1046	=	MGG_15172T0	supercont8.1:6543553-6544330	501	0	0.0497836	0	0	0	0	0	0.149351	hypothetical protein (501 nt)	501	501	60.88
TCONS_00001080	XLOC_001016	NA	MGG_10621	TSS1047	=	MGG_10621T0	supercont8.1:6546760-6548342	1582	0	0.022017	0	0	0	0	0.0330478	0.0330031	xylosidase/arabinosidase (1536 nt)	1582	1536	66.86
TCONS_00001081	XLOC_001017	NA	MGG_14303	TSS1048	=	MGG_14303T0	supercont8.1:6556884-6558525	1641	17.8171	33.5745	17.4925	18.4238	17.5349	30.523	35.7576	34.4429	beta-xylosidase (1641 nt)	1641	1641	61
TCONS_00001082	XLOC_001018	NA	MGG_14302	TSS1049	=	MGG_14302T0	supercont8.1:6558909-6561181	2217	38.9396	64.8459	45.2497	36.4751	35.0939	74.7023	60.876	58.9594	hypothetical protein (2082 nt)	2217	2082	62.78
TCONS_00001083	XLOC_001019	NA	MGG_10630	TSS1050	=	MGG_10630T0	supercont8.1:6564002-6569875	3140	32.2711	49.5883	31.5209	33.2824	32.0099	49.5226	49.3827	49.8597	hypothetical protein (1137 nt)	3140	1137	58.75
TCONS_00001084	XLOC_001020	NA	MGG_10633	TSS1051	=	MGG_10633T0	supercont8.1:6572178-6573627	1347	106.195	104.161	111.793	102.801	103.99	105.498	104.795	102.19	AP-1 complex subunit mu-1 (1347 nt)	1347	1347	52.12
TCONS_00001085	XLOC_001021	NA	MGG_14301	TSS1052	=	MGG_14301T0	supercont8.1:6574411-6574804	393	3.43742	1.20136	3.15081	2.39821	4.76324	1.29703	1.15426	1.15277	calpastatin (393 nt)	393	393	62.09
TCONS_00001086	XLOC_001022	NA	MGG_10634	TSS1053	=	MGG_10634T0	supercont8.1:6575221-6580194	2822	23.7026	28.6934	27.2744	21.394	22.4394	33.0964	26.0739	26.9099	chromate ion transporter (1509 nt)	2822	1509	56.33
TCONS_00001087	XLOC_001023	NA	MGG_10637	TSS1054	=	MGG_10637T0	supercont8.1:6586335-6587915	1471	7.91259	11.3938	7.37429	8.61176	7.75174	11.28	10.8841	12.0173	hypothetical protein (993 nt)	1471	993	52.27
TCONS_00001088	XLOC_001024	NA	MGG_10638	TSS1055	=	MGG_10638T0	supercont8.1:6588077-6590882	2805	9.65397	11.4404	9.52554	9.81269	9.62368	10.3243	12.2962	11.7006	hypothetical protein (2187 nt)	2805	2187	55.14
TCONS_00001089	XLOC_001025	NA	MGG_14295	TSS1056	=	MGG_14295T0	supercont8.1:6599920-6601344	1224	0	0.0260981	0	0	0	0.0338161	0	0.0444781	hypothetical protein (1224 nt)	1224	1224	53.02
TCONS_00001092	XLOC_001028	NA	MGG_13743	TSS1059	=	MGG_13743T0	supercont8.1:6611176-6612347	1171	0.913315	2.7568	1.04453	0.89104	0.804374	2.40467	3.146	2.71973	hypothetical protein (1020 nt)	1171	1020	55.88
TCONS_00001093	XLOC_001029	NA	MGG_13744	TSS1060	=	MGG_13744T0	supercont8.1:6612497-6613846	1292	0.0240223	0.0883149	0	0.0720668	0	0.181443	0.0417791	0.0417226	MIPC synthase (1065 nt)	1292	1065	56.15
TCONS_00001094	XLOC_001030	NA	MGG_10892	TSS1061	=	MGG_10892T0	supercont8.1:6619288-6619660	372	0.292631	0	0.433789	0	0.444103	0	0	0	hypothetical protein (372 nt)	372	372	66.4
TCONS_00001095	XLOC_001031	NA	MGG_10887	TSS1062	=	MGG_10887T0	supercont8.1:6635747-6636832	920	27.4084	28.0211	26.5895	26.9372	28.6984	26.2132	29.4497	28.4004	hypothetical protein (474 nt)	920	474	55.49
TCONS_00001096	XLOC_001032	NA	MGG_16482	TSS1063	=	MGG_16482T0	supercont8.1:6639998-6640693	695	12.9764	14.6864	11.9779	13.6016	13.3497	13.5764	15.9381	14.5447	hypothetical protein (654 nt)	695	654	54.89
TCONS_00001097	XLOC_001033	NA	MGG_16483	TSS1064	=	MGG_16483T0	supercont8.1:6640939-6641599	660	1.99241	4.89403	2.24518	2.38097	1.35107	4.93841	5.12114	4.62255	hypothetical protein (660 nt)	660	660	53.33
TCONS_00001099	XLOC_001035	NA	MGG_16486	TSS1066	=	MGG_16486T0	supercont8.1:6660376-6668526	7149	0.29527	0.231845	0.341577	0.352358	0.191875	0.24083	0.250571	0.204135	hypothetical protein (7149 nt)	7149	7149	53.56
TCONS_00001101	XLOC_001036	NA	MGG_16487	TSS1068	=	MGG_16487T0	supercont8.1:6670815-6671359	544	2.08282	1.81307	3.53985	1.13319	1.57543	2.55549	1.57388	1.30983	hypothetical protein (303 nt)	544	303	56.44
TCONS_00001103	XLOC_001038	NA	MGG_16490	TSS1070	=	MGG_16490T0	supercont8.1:6691400-6692497	765	12.5431	17.248	11.6492	11.6531	14.3269	17.8535	17.1976	16.693	hypothetical protein (765 nt)	765	765	55.82
TCONS_00001105	XLOC_001040	NA	MGG_13756	TSS1072	=	MGG_13756T0	supercont8.1:6697159-6697969	810	0	0.0247962	0	0	0	0	0	0.0743886	hypothetical protein (810 nt)	810	810	66.17
TCONS_00001106	XLOC_001041	NA	MGG_04787	TSS1073	=	MGG_04787T0	supercont8.1:6698396-6699311	915	0.036605	0.0236142	0	0.109815	0	0.0708426	0	0	tetracenomycin polyketide synthesis O-methyltransferase tcmP (915 nt)	915	915	56.5
TCONS_00001109	XLOC_001044	NA	MGG_04780	TSS1076	=	MGG_04780T1	supercont8.1:6721310-6726915	5138	2.15707	2.81111	3.26099	2.10121	1.109	3.01789	2.78598	2.62946	sugar transporter STL1, variant (1602 nt)	5138	1602	52.75
TCONS_00001110	XLOC_001044	NA	MGG_04780	TSS1076	=	MGG_04780T0	supercont8.1:6721310-6726915	5315	5.90982	3.02467	5.72249	5.42802	6.57897	3.6521	2.76431	2.65759	sugar transporter STL1 (1602 nt)	5315	1602	52.75
TCONS_00001111	XLOC_001045	NA	MGG_04779	TSS1077	=	MGG_04779T0	supercont8.1:6727110-6728036	876	10.4453	33.5477	10.8687	8.59188	11.8755	30.3859	35.7236	34.5335	hypothetical protein (876 nt)	876	876	56.51
TCONS_00001112	XLOC_001046	NA	MGG_04778	TSS1078	=	MGG_04778T0	supercont8.1:6728183-6729778	1467	2.70645	2.24119	2.42069	2.9832	2.71547	2.18625	2.34222	2.19511	hypothetical protein (1467 nt)	1467	1467	57.87
TCONS_00001113	XLOC_001047	NA	MGG_04774	TSS1079	=	MGG_04774T0	supercont8.1:6741664-6742614	883	0.114925	1.4896	0	0.344774	0	1.20782	1.7314	1.52957	hypothetical protein (771 nt)	883	771	58.63
TCONS_00001114	XLOC_001048	NA	MGG_13762	TSS1080	=	MGG_13762T0	supercont8.1:6743711-6748276	3966	1.91454	1.28323	2.33782	1.86554	1.54026	1.61419	0.972705	1.2628	multidrug resistance protein 3 (3966 nt)	3966	3966	55.12
TCONS_00001115	XLOC_001049	NA	MGG_13763	TSS1081	=	MGG_13763T0	supercont8.1:6748638-6750122	1484	49.2679	11.4142	61.9361	43.1151	42.7526	14.7331	10.2766	9.23286	glycerate kinase (1464 nt)	1484	1464	57.86
TCONS_00001116	XLOC_001050	NA	MGG_04765	TSS1082	=	MGG_04765T0	supercont8.1:6751133-6753111	1827	404.896	219.105	441.622	386.925	386.141	233.632	213.67	210.014	hypothetical protein (1488 nt)	1827	1488	56.12
TCONS_00001117	XLOC_001051	NA	MGG_04757	TSS1083	=	MGG_04757T0	supercont8.1:6757288-6759894	2490	78.036	119.502	71.0725	82.0787	80.9568	108.393	123.174	126.937	hypothetical protein (1485 nt)	2490	1485	64.98
TCONS_00001118	XLOC_001052	NA	MGG_04756	TSS1084	=	MGG_04756T0	supercont8.1:6760960-6764829	1940	3.31779	3.36721	3.49561	3.57879	2.87898	3.09235	3.41514	3.59416	glutamyl-tRNA(Gln) amidotransferase subunit A (1668 nt)	1940	1668	59.59
TCONS_00001119	XLOC_001053	NA	MGG_13768	TSS1085	=	MGG_13768T0	supercont8.1:6780105-6782490	2385	29.7492	1.72651	29.5763	29.8506	29.8208	1.70648	2.00965	1.46338	hypothetical protein (1719 nt)	2385	1719	59.74
TCONS_00001121	XLOC_001055	NA	MGG_16500	TSS1087	=	MGG_16500T0	supercont8.1:6813507-6814719	1034	0.733083	0.720958	1.07173	0.659643	0.467881	1.2352	0.327699	0.599973	hypothetical protein (621 nt)	1034	621	51.53
TCONS_00001123	XLOC_001057	NA	MGG_15310	TSS1089	=	MGG_15310T0	supercont8.1:6825661-6827566	927	0.534052	0.677516	0.416262	0.864114	0.32178	0.656762	0.438151	0.937634	hypothetical protein (927 nt)	927	927	56.74
TCONS_00001124	XLOC_001058	NA	MGG_04734	TSS1090	=	MGG_04734T0	supercont8.1:6841620-6841968	348	0	0.0994853	0	0	0	0	0.298456	0	hypothetical protein (348 nt)	348	348	55.75
TCONS_00001126	XLOC_001060	NA	MGG_04727	TSS1092	=	MGG_04727T0	supercont8.1:6855228-6859910	4682	24.7393	17.7235	26.1955	23.2004	24.8221	17.4594	17.8319	17.8791	U4/U6 snRNA-associated-splicing factor PRP24 (3402 nt)	4682	3402	60.2
TCONS_00001127	XLOC_001061	NA	MGG_04720	TSS1093	=	MGG_04720T0	supercont8.1:6869043-6870992	1879	17.5342	22.614	17.2414	17.3217	18.0395	20.944	23.4377	23.4604	hypothetical protein (1188 nt)	1879	1188	59.85
TCONS_00001128	XLOC_001062	NA	MGG_04719	TSS1094	=	MGG_04719T0	supercont8.1:6871256-6873177	1417	794.145	470.93	837.543	775.028	769.864	494.518	454.668	463.605	guanine nucleotide-binding protein subunit beta-like protein (951 nt)	1417	951	60.15
TCONS_00001129	XLOC_001063	NA	MGG_04717	TSS1095	=	MGG_04717T0	supercont8.1:6874925-6878261	2040	10.463	9.77328	11.75	9.72592	9.91311	10.9201	9.66546	8.73427	hypothetical protein (1791 nt)	2040	1791	62.03
TCONS_00001130	XLOC_001064	NA	MGG_04715	TSS1096	=	MGG_04715T0	supercont8.1:6878563-6878950	267	19.2391	12.2249	20.4084	19.815	17.4941	10.9475	9.41944	16.3077	hypothetical protein (267 nt)	267	267	55.43
TCONS_00001131	XLOC_001065	NA	MGG_13771	TSS1097	=	MGG_13771T0	supercont8.1:6884479-6885240	538	0.37028	0	0.651232	0.230605	0.229001	0	0	0	hypothetical protein (465 nt)	538	465	55.05
TCONS_00001132	XLOC_001066	NA	MGG_13772	TSS1098	=	MGG_13772T0	supercont8.1:6885619-6890075	2157	6.00296	0.909796	5.52687	5.64061	6.84138	1.0715	0.864532	0.793358	hypothetical protein (1779 nt)	2157	1779	52.89
TCONS_00001133	XLOC_001067	NA	MGG_13773	TSS1099	=	MGG_13773T0	supercont8.1:6891140-6893389	2249	40.9892	15.8904	44.9189	39.9092	38.1394	17.5599	15.4005	14.7109	indoleamine 2,3-dioxygenase subfamily (1536 nt)	2249	1536	64.91
TCONS_00001134	XLOC_001068	NA	MGG_13775	TSS1100	=	MGG_13775T0	supercont8.1:6898687-6899415	572	115.35	78.1241	118.998	115.387	111.667	82.6836	75.2879	76.4008	hypothetical protein (198 nt)	572	198	63.13
TCONS_00001135	XLOC_001069	NA	MGG_15309	TSS1101	=	MGG_15309T0	supercont8.1:6900742-6901315	573	1.63873	0.881479	2.4126	1.46467	1.03891	0.950163	0.726668	0.967606	hypothetical protein (573 nt)	573	573	65.79
TCONS_00001136	XLOC_001070	NA	MGG_16505	TSS1102	=	MGG_16505T0	supercont8.1:6903644-6904183	420	1.0557	1.16154	0.360961	1.75841	1.04774	1.65714	0.60969	1.21779	hypothetical protein (420 nt)	420	420	52.38
TCONS_00001137	XLOC_001071	NA	MGG_13777	TSS1103	=	MGG_13777T0	supercont8.1:6905099-6906033	849	1.14736	2.50918	1.27512	0.846312	1.32063	2.69731	2.38173	2.44849	beta-glucanase (849 nt)	849	849	65.96
TCONS_00001138	XLOC_001072	NA	MGG_04709	TSS1104	=	MGG_04709T0	supercont8.1:6915642-6921170	5249	7.52881	12.9467	8.76587	6.47482	7.34574	13.8069	13.0917	11.9414	hypothetical protein (4515 nt)	5249	4515	53.64
TCONS_00001139	XLOC_001073	NA	MGG_15308	TSS1105	=	MGG_15308T0	supercont8.1:6927438-6927979	319	0.427344	0.734217	1.28203	0	0	0.731651	1.1036	0.367404	hypothetical protein (159 nt)	319	159	54.09
TCONS_00001140	XLOC_001074	NA	MGG_04693	TSS1106	=	MGG_04693T0	supercont8.1:6929519-6931564	1775	35.1403	22.9891	39.4132	32.5713	33.4364	24.9852	21.8755	22.1066	WD repeat-containing protein 57 (1059 nt)	1775	1059	55.05
TCONS_00001141	XLOC_001075	NA	MGG_04692	TSS1107	=	MGG_04692T0	supercont8.1:6932065-6935479	3345	7.07108	12.6545	7.83413	6.85059	6.52852	13.4544	12.3575	12.1517	hypothetical protein (1485 nt)	3345	1485	63.23
TCONS_00001142	XLOC_001076	NA	MGG_13778	TSS1108	=	MGG_13778T0	supercont8.1:6936616-6939660	1993	209.646	175.791	226.054	200.879	202.005	194.06	165.445	167.869	zinc finger protein GIS2 (693 nt)	1993	693	64.94
TCONS_00001143	XLOC_001077	NA	MGG_15307	TSS1109	=	MGG_15307T0	supercont8.1:6940845-6941888	936	0.148842	0.0359304	0.233867	0.106702	0.105957	0.0460409	0	0.0617503	hypothetical protein (936 nt)	936	936	61.65
TCONS_00001144	XLOC_001078	NA	MGG_15306	TSS1110	=	MGG_15306T0	supercont8.1:6942531-6943894	1182	2.19911	0.878333	1.48602	2.96372	2.1476	0.73228	1.16081	0.741913	hypothetical protein (1182 nt)	1182	1182	61.25
TCONS_00001146	XLOC_001080	NA	MGG_04687	TSS1112	=	MGG_04687T0	supercont8.1:6951339-6952968	1629	1031.63	296.769	856.53	1122.45	1115.91	251.947	321.345	317.016	hypothetical protein (858 nt)	1629	858	68.3
TCONS_00001147	XLOC_001081	NA	GUF1	TSS1113	=	MGG_04686T0	supercont8.1:6953077-6955722	2567	6.47993	5.6277	6.25867	6.23182	6.9493	5.27476	5.83708	5.77125	GTP-binding protein LepA (2106 nt)	2567	2106	62.87
TCONS_00001148	XLOC_001082	NA	MGG_04682	TSS1114	=	MGG_04682T0	supercont8.1:6973231-6975611	2261	72.4808	110.444	76.4934	69.4067	71.5424	115.549	107	108.782	hypothetical protein (1224 nt)	2261	1224	62.25
TCONS_00001149	XLOC_001083	NA	MGG_04680	TSS1115	=	MGG_04680T0	supercont8.1:6986593-6988715	2122	11.0273	8.83577	12.238	9.8863	10.9577	9.55706	8.11239	8.83788	hypothetical protein (1374 nt)	2122	1374	58.08
TCONS_00001150	XLOC_001084	NA	MGG_04678	TSS1116	=	MGG_04678T0	supercont8.1:6997122-6999056	1761	6.50097	8.90995	6.87373	6.76433	5.86484	9.12008	8.8401	8.76967	hypothetical protein (645 nt)	1761	645	57.05
TCONS_00001151	XLOC_001085	NA	MGG_04677	TSS1117	=	MGG_04677T0	supercont8.1:7004607-7006746	1938	112.709	78.9219	114.903	113.292	109.932	76.6528	79.5588	80.5542	hypothetical protein (1938 nt)	1938	1938	55.57
TCONS_00001152	XLOC_001086	NA	MGG_13787	TSS1118	=	MGG_13787T0	supercont8.1:7007367-7007529	162	506.473	322.851	676.576	610.212	232.629	344.129	353.48	270.945	hypothetical protein (162 nt)	162	162	53.7
TCONS_00001153	XLOC_001087	NA	MGG_04640	TSS1119	=	MGG_04640T0	supercont8.1:7012393-7016646	4054	16.4457	7.34835	17.6615	15.4852	16.1903	7.86771	7.3547	6.82262	sulfate permease 2 (2535 nt)	4054	2535	59.76
TCONS_00001154	XLOC_001088	NA	MGG_04639	TSS1120	=	MGG_04639T0	supercont8.1:7017366-7021069	2058	0.36327	5.82823	0.286879	0.339451	0.463479	5.63245	5.73342	6.11883	phenol 2-monooxygenase (2058 nt)	2058	2058	63.8
TCONS_00001155	XLOC_001089	NA	MGG_04637	TSS1121	=	MGG_04637T0	supercont8.1:7021404-7024858	3124	19.7463	24.0323	20.0316	19.3229	19.8843	23.7924	24.0748	24.2297	tyrosine-protein phosphatase CDC14 (1926 nt)	3124	1926	58.88
TCONS_00001156	XLOC_001090	NA	MGG_16509	TSS1122	=	MGG_16509T0	supercont8.1:7027085-7028143	771	0.259951	0.0530175	0.233601	0.137281	0.40897	0	0.159052	0	hypothetical protein (771 nt)	771	771	54.86
TCONS_00001157	XLOC_001091	NA	MGG_04635	TSS1123	=	MGG_04635T0	supercont8.1:7030978-7033296	2235	0.879252	3.72833	0.862608	0.736239	1.03891	3.77394	3.79787	3.61319	hypothetical protein (1632 nt)	2235	1632	60.85
TCONS_00001158	XLOC_001092	NA	MGG_04633	TSS1124	=	MGG_04633T0	supercont8.1:7037448-7041282	3555	0.203129	3.09703	0.11684	0.282303	0.210245	2.92286	3.16583	3.20241	hypothetical protein (3555 nt)	3555	3555	52.74
TCONS_00001159	XLOC_001093	NA	MGG_04631	TSS1125	=	MGG_04631T0	supercont8.1:7044756-7046453	1068	0.499582	3.15392	0.506977	0.362254	0.629515	3.27191	3.14946	3.04038	terpene synthase metal binding domain-containing protein (1068 nt)	1068	1068	54.68
TCONS_00001160	XLOC_001094	NA	MGG_04629	TSS1126	=	MGG_04629T0	supercont8.1:7049152-7054409	4769	27.7584	27.9351	30.4468	25.9215	26.9068	29.7292	27.4472	26.629	integral membrane protein (3783 nt)	4769	3783	55.43
TCONS_00001161	XLOC_001095	NA	MGG_04628	TSS1127	=	MGG_04628T0	supercont8.1:7055917-7061230	1785	4.85971	1.27292	5.46442	4.37518	4.73953	1.48528	1.03789	1.2956	cytochrome P450 51 (1548 nt)	1785	1548	58.66
TCONS_00001162	XLOC_001096	NA	MGG_04626	TSS1128	=	MGG_04626T0	supercont8.1:7061450-7067846	1099	71.0617	74.8161	69.22	70.9277	73.0374	70.4985	76.9002	77.0497	6,7-dimethyl-8-ribityllumazine synthase (603 nt)	1099	603	65.01
TCONS_00001163	XLOC_001097	NA	MGG_16510	TSS1129	=	MGG_16510T0	supercont8.1:7067854-7068951	549	0.228919	0.0485507	0.242998	0	0.44376	0.145652	0	0	hypothetical protein (549 nt)	549	549	57.92
TCONS_00001164	XLOC_001098	NA	MGG_04623	TSS1130	=	MGG_04623T0	supercont8.1:7073597-7076813	2836	27.8096	14.532	26.1909	29.0326	28.2052	13.8271	14.565	15.204	cation efflux family protein (1686 nt)	2836	1686	58.3
TCONS_00001165	XLOC_001099	NA	MGG_04622	TSS1131	=	MGG_04622T0	supercont8.1:7084605-7086014	1331	117.312	189.872	109.556	122.552	119.829	175.306	195.515	198.796	proteasome component C5 (798 nt)	1331	798	62.16
TCONS_00001166	XLOC_001100	NA	MGG_04609	TSS1132	=	MGG_04609T0	supercont8.1:7099384-7106199	2921	8.06591	11.5078	8.3031	8.2642	7.63044	11.6829	10.9658	11.8747	hypothetical protein (1731 nt)	2921	1731	61.93
TCONS_00001167	XLOC_001101	NA	MGG_13793	TSS1133	=	MGG_13793T0	supercont8.1:7107283-7110884	3514	19.4543	63.1256	20.6288	18.8622	18.872	69.0663	60.5482	59.7624	nitrate transporter (1602 nt)	3514	1602	59.99
TCONS_00001168	XLOC_001102	NA	MGG_04595	TSS1134	=	MGG_04595T0	supercont8.1:7130475-7131483	752	2.29016	5.45907	2.65434	1.90448	2.31166	5.31568	5.81958	5.24195	hypothetical protein (234 nt)	752	234	47.44
TCONS_00001169	XLOC_001102	NA	MGG_04595	TSS1134	=	MGG_04595T1	supercont8.1:7130475-7131483	850	0.821907	2.09562	0.758633	0.915631	0.791456	2.62373	1.97473	1.6884	hypothetical protein, variant (189 nt)	850	189	47.62
TCONS_00001170	XLOC_001103	NA	MGG_04594	TSS1135	=	MGG_04594T0	supercont8.1:7131799-7133659	1554	0.534772	3.74811	0.444569	0.639876	0.519872	4.60423	3.40657	3.23354	hypothetical protein (1554 nt)	1554	1554	50.45
TCONS_00001171	XLOC_001104	NA	MGG_04593	TSS1136	=	MGG_04593T0	supercont8.1:7134365-7138249	3403	1.83417	11.0683	1.99143	1.74944	1.76166	11.5239	10.8764	10.8045	serine/threonine protein kinase (2952 nt)	3403	2952	50.71
TCONS_00001172	XLOC_001105	NA	MGG_04590	TSS1137	=	MGG_04590T0	supercont8.1:7143033-7150182	2954	1.58119	2.4127	1.34703	1.57577	1.82078	2.53826	2.54249	2.15735	acetyl-coenzyme A synthetase (2181 nt)	2954	2181	61.26
TCONS_00001173	XLOC_001106	NA	MGG_04583	TSS1138	=	MGG_04583T0	supercont8.1:7150678-7151925	1152	1.64175	1.90936	1.63057	1.90008	1.39459	1.46874	2.34645	1.91289	hypothetical protein (426 nt)	1152	426	64.55
TCONS_00001174	XLOC_001107	NA	MGG_04582	TSS1139	=	MGG_04582T0	supercont8.1:7156395-7158640	2245	873.051	617.608	754.384	949.857	914.911	536.15	662.349	654.326	hypothetical protein (1626 nt)	2245	1626	64.51
TCONS_00001175	XLOC_001108	NA	MGG_13801	TSS1140	=	MGG_13801T0	supercont8.1:7159073-7162652	3460	11.3723	4.2077	12.1882	10.8702	11.0585	4.31522	4.31113	3.99675	beta-galactosidase (2763 nt)	3460	2763	64.97
TCONS_00001176	XLOC_001109	NA	MGG_16514	TSS1141	=	MGG_16514T0	supercont8.1:7162967-7163633	561	4.33114	2.30808	5.66844	4.10597	3.219	4.29916	1.5009	1.12419	hypothetical protein (384 nt)	561	384	55.73
TCONS_00001177	XLOC_001110	NA	MGG_04566	TSS1142	=	MGG_04566T0	supercont8.1:7175364-7176586	1125	40.8152	59.546	45.4384	38.9352	38.0722	65.0344	57.1603	56.4435	RWD domain-containing protein (693 nt)	1125	693	60.32
TCONS_00001178	XLOC_001111	NA	MGG_16515	TSS1143	=	MGG_16515T0	supercont8.1:7183447-7184565	393	3.79128	0.759468	3.00225	5.19611	3.17549	0.663631	0.692557	0.922217	hypothetical protein (393 nt)	393	393	54.2
TCONS_00001179	XLOC_001112	NA	MGG_16516	TSS1144	=	MGG_16516T0	supercont8.1:7187553-7188056	367	0.155826	0.088425	0.467479	0	0	0	0	0.265275	hypothetical protein (318 nt)	367	318	50.63
TCONS_00001180	XLOC_001113	NA	MGG_04561	TSS1145	=	MGG_04561T0	supercont8.1:7196345-7197582	1069	3.09182	6.3609	2.87746	2.89472	3.50328	5.61753	6.34415	7.12101	DNA repair family protein (960 nt)	1069	960	54.37
TCONS_00001181	XLOC_001114	NA	MGG_04559	TSS1146	=	MGG_04559T0	supercont8.1:7200707-7203825	2972	29.2929	32.2087	33.0815	26.9275	27.8695	35.7958	30.1636	30.6667	exocyst complex component protein (2556 nt)	2972	2556	53.68
TCONS_00001182	XLOC_001115	NA	MGG_04558	TSS1147	=	MGG_04558T0	supercont8.1:7205058-7208506	2805	14.8641	19.093	17.863	11.6083	15.121	23.8011	17.2069	16.2711	pre-mRNA-processing factor 39 (1761 nt)	2805	1761	55.76
TCONS_00001183	XLOC_001115	NA	MGG_04558	TSS1147	=	MGG_04558T1	supercont8.1:7205058-7208506	3205	6.06395	6.28795	5.30873	7.89699	4.98614	5.02887	6.7851	7.04988	pre-mRNA-processing factor 39, variant (1329 nt)	3205	1329	55.3
TCONS_00001184	XLOC_001116	NA	MGG_13805	TSS1148	=	MGG_13805T0	supercont8.1:7209970-7211615	1200	4.21158	6.17077	4.40675	3.69728	4.53071	5.52619	5.42653	7.55958	hypothetical protein (1200 nt)	1200	1200	63.58
TCONS_00001185	XLOC_001117	NA	MGG_04557	TSS1149	=	MGG_04557T0	supercont8.1:7218761-7219722	710	0.302697	2.38939	0.448514	0.307099	0.152479	2.28002	2.49015	2.39801	hypothetical protein (621 nt)	710	621	59.58
TCONS_00001186	XLOC_001118	NA	MGG_04556	TSS1150	=	MGG_04556T0	supercont8.1:7220933-7222831	1577	16.1385	67.6715	18.7199	14.5294	15.1661	78.1243	62.7857	62.1046	alcohol dehydrogenase 1 (1020 nt)	1577	1020	57.75
TCONS_00001187	XLOC_001119	NA	MGG_04551	TSS1151	=	MGG_04551T0	supercont8.1:7232468-7237921	1287	127.725	186.94	141.634	121.627	119.914	198.149	181.605	181.067	proteasome component PUP3 (621 nt)	1287	621	60.71
TCONS_00001188	XLOC_001120	NA	MGG_04549	TSS1152	=	MGG_04549T0	supercont8.1:7240763-7246004	4933	12.6076	17.5958	13.0355	12.4621	12.3251	18.793	17.5165	16.4779	synaptojanin 2 (4227 nt)	4933	4227	54.39
TCONS_00001189	XLOC_001121	NA	MGG_04548	TSS1153	=	MGG_04548T0	supercont8.1:7246279-7248442	2053	8.80599	22.7473	9.79964	8.16876	8.44956	23.8608	21.8604	22.5207	4-coumarate-CoA ligase (1674 nt)	2053	1674	66.79
TCONS_00001190	XLOC_001122	NA	MGG_16518	TSS1154	=	MGG_16518T0	supercont8.1:7256321-7256763	381	0	0.0759019	0	0	0	0.227706	0	0	hypothetical protein (381 nt)	381	381	58.27
TCONS_00001191	XLOC_001123	NA	MGG_13809	TSS1155	=	MGG_13809T0	supercont8.1:7257182-7260864	3240	2.7356	2.92651	3.00629	2.75167	2.44885	2.83623	2.80063	3.14267	cellobiose dehydrogenase (2448 nt)	3240	2448	64.46
TCONS_00001192	XLOC_001124	NA	MGG_16519	TSS1156	=	MGG_16519T0	supercont8.1:7261980-7262427	355	1.88681	0.390186	2.70198	1.48434	1.47411	0.314927	0.285454	0.570178	hypothetical protein (276 nt)	355	276	58.7
TCONS_00001193	XLOC_001125	NA	MGG_16520	TSS1157	=	MGG_16520T0	supercont8.1:7262857-7264629	1772	3.73576	21.4381	4.36185	3.70946	3.13596	20.8874	21.6846	21.7423	hypothetical protein (1557 nt)	1772	1557	66.47
TCONS_00001194	XLOC_001126	NA	MGG_04544	TSS1158	=	MGG_04544T0	supercont8.1:7267557-7269272	1520	42.7967	14.6023	36.6629	44.3896	47.3376	11.6215	16.6048	15.5805	F1F0 ATP synthase assembly protein Atp11 (1038 nt)	1520	1038	63.29
TCONS_00001195	XLOC_001127	NA	MGG_04511	TSS1159	=	MGG_04511T0	supercont8.1:7269694-7271540	1503	1.26411	0.611469	0.898009	1.93405	0.960261	0.643709	0.630771	0.559927	MFS transporter (1503 nt)	1503	1503	59.61
TCONS_00001196	XLOC_001128	NA	MGG_04509	TSS1160	=	MGG_04509T0	supercont8.1:7275983-7278573	1275	0.182609	0.0668691	0.109131	0.366007	0.0726896	0.0309194	0.127309	0.042379	hypothetical protein (1275 nt)	1275	1275	56.71
TCONS_00001197	XLOC_001129	NA	MGG_04507	TSS1161	=	MGG_04507T0	supercont8.1:7278616-7281059	928	43.1622	65.6383	45.1934	45.3041	38.9893	65.4863	66.3832	65.0455	synbindin (450 nt)	928	450	56.67
TCONS_00001198	XLOC_001130	NA	MGG_04505	TSS1162	=	MGG_04505T0	supercont8.1:7281234-7284611	2022	10.5465	16.0425	8.74123	11.9851	10.9131	15.2284	17.2129	15.6861	hypothetical protein (1203 nt)	2022	1203	61.18
TCONS_00001199	XLOC_001131	NA	MGG_04503	TSS1163	=	MGG_04503T0	supercont8.1:7285649-7289533	3540	40.1446	17.6241	49.7492	34.5482	36.1365	20.9285	16.5032	15.4405	carbamoyl-phosphate synthase subunit arginine-specific large (3540 nt)	3540	3540	57.66
TCONS_00001200	XLOC_001132	NA	MGG_04500	TSS1164	=	MGG_04500T0	supercont8.1:7294514-7296108	1376	75.2212	75.563	90.1961	66.2705	69.197	88.3903	68.4593	69.8395	dolichyl-diphosphooligosaccharide-protein glycotransferase (990 nt)	1376	990	58.18
TCONS_00001201	XLOC_001133	NA	MGG_04499	TSS1165	=	MGG_04499T0	supercont8.1:7297918-7301859	1479	0.187281	0.251234	0.193291	0.246276	0.122277	0.289974	0.214185	0.249544	exoglucanase-6A (1188 nt)	1479	1188	63.97
TCONS_00001202	XLOC_001134	NA	MGG_04496	TSS1166	=	MGG_04496T0	supercont8.1:7304035-7305116	985	16.3408	15.3845	16.1213	15.0122	17.8888	15.5499	15.0224	15.5814	oligoribonuclease (771 nt)	985	771	56.42
TCONS_00001203	XLOC_001135	NA	MGG_04495	TSS1167	=	MGG_04495T0	supercont8.1:7305189-7307950	2406	125.509	124.163	120.451	126.741	129.333	116.147	129.304	127.037	phosphoglucomutase (1665 nt)	2406	1665	56.64
TCONS_00001204	XLOC_001136	NA	MGG_04494	TSS1168	=	MGG_04494T0	supercont8.1:7308460-7311915	3455	5.80125	5.80905	5.2293	5.64954	6.52491	6.04292	5.61166	5.77257	hypothetical protein (2097 nt)	3455	2097	66.05
TCONS_00001205	XLOC_001137	NA	MGG_16521	TSS1169	=	MGG_16521T0	supercont8.1:7311939-7318317	1290	3.45008	3.38943	3.59035	2.96014	3.79976	3.93636	2.88802	3.3439	hypothetical protein (309 nt)	1290	309	52.75
TCONS_00001206	XLOC_001138	NA	MGG_04490	TSS1170	=	MGG_04490T0	supercont8.1:7321903-7327800	1624	4.8373	6.52281	4.47955	4.92353	5.10881	5.04766	7.089	7.43177	hypothetical protein (1284 nt)	1624	1284	61.45
TCONS_00001207	XLOC_001139	NA	MGG_15297	TSS1171	=	MGG_15297T0	supercont8.1:7321903-7327800	1330	1.55644	0.706065	2.2412	1.0448	1.38333	0.786547	0.646097	0.685551	hypothetical protein (1215 nt)	1330	1215	53.58
TCONS_00001208	XLOC_001140	NA	ATG11	TSS1172	=	MGG_04486T0	supercont8.1:7331074-7337960	5287	9.88004	13.9519	10.0248	10.0123	9.60305	14.1215	13.9846	13.7497	autophagy-like protein 11 (4188 nt)	5287	4188	54.68
TCONS_00001209	XLOC_001141	NA	MGG_13813	TSS1173	=	MGG_13813T0	supercont8.1:7338612-7341323	1278	15.1027	24.024	13.883	15.7677	15.6575	21.2382	26.1953	24.6386	phosphoribosylglycinamide formyltransferase (672 nt)	1278	672	63.39
TCONS_00001210	XLOC_001142	NA	MGG_15296	TSS1174	=	MGG_15296T0	supercont8.1:7349846-7350670	615	0.791319	0.725064	0.872785	0.753209	0.747962	0.867981	0.545095	0.762118	hypothetical protein (615 nt)	615	615	59.84
TCONS_00001211	XLOC_001143	NA	MGG_13816	TSS1175	=	MGG_13816T0	supercont8.1:7360016-7365708	1828	29.5707	22.8593	29.1364	29.9165	29.6591	21.8988	23.4115	23.2677	hypothetical protein (774 nt)	1828	774	59.56
TCONS_00001212	XLOC_001144	NA	MGG_04477	TSS1176	=	MGG_04477T0	supercont8.1:7366535-7371235	4700	6.46719	8.41874	7.00581	6.141	6.25478	9.23697	7.79639	8.22285	DNA-directed RNA polymerase III subunit RPC1 (4371 nt)	4700	4371	53.35
TCONS_00001213	XLOC_001145	NA	MGG_04476	TSS1177	=	MGG_04476T0	supercont8.1:7371591-7373774	1906	43.5732	24.9885	46.8283	43.0598	40.8315	24.8974	25.5597	24.5083	FK506-binding protein 4 (1458 nt)	1906	1458	60.49
TCONS_00001214	XLOC_001146	NA	MGG_04475	TSS1178	=	MGG_04475T0	supercont8.1:7374569-7377879	3121	0.0549899	0.0745226	0.0572883	0.0540299	0.0536516	0.0982766	0.0783469	0.0469443	AGC/NDR protein kinase (3036 nt)	3121	3036	59.12
TCONS_00001215	XLOC_001147	NA	MGG_04473	TSS1179	=	MGG_04473T0	supercont8.1:7381249-7383510	2193	7.91141	12.0355	6.8966	8.86235	7.97528	10.7244	12.2296	13.1525	WD repeat containing protein 5 (1785 nt)	2193	1785	62.91
TCONS_00001216	XLOC_001148	NA	MGG_16524	TSS1180	=	MGG_16524T0	supercont8.1:7383900-7390524	201	1.69569	0	0	5.08708	0	0	0	0	hypothetical protein (201 nt)	201	201	54.73
TCONS_00001217	XLOC_001149	NA	MGG_04470	TSS1181	=	MGG_04470T0	supercont8.1:7390664-7396541	3086	13.7497	7.57784	13.512	13.9718	13.7653	7.13823	8.2467	7.34859	hypothetical protein (2694 nt)	3086	2694	54.71
TCONS_00001218	XLOC_001150	NA	MGG_04467	TSS1182	=	MGG_04467T0	supercont8.1:7401805-7407645	1484	775.077	457.707	867.014	722.898	735.32	503.791	435.777	433.554	60S acidic ribosomal protein P0 (942 nt)	1484	942	61.15
TCONS_00001219	XLOC_001151	NA	MGG_04465	TSS1183	=	MGG_04465T0	supercont8.1:7408567-7409605	1038	9302.65	673.339	8215.1	9953.29	9739.57	591.276	707.736	721.005	hypothetical protein (1038 nt)	1038	1038	57.32
TCONS_00001220	XLOC_001152	NA	MGG_04464	TSS1184	=	MGG_04464T0	supercont8.1:7411408-7414787	3222	54.2523	109.246	54.8333	55.5695	52.3539	107.473	109.647	110.617	alpha-mannosidase (3222 nt)	3222	3222	54.53
TCONS_00001221	XLOC_001153	NA	MGG_04463	TSS1185	=	MGG_04463T0	supercont8.1:7415248-7420672	2384	17.1666	17.1184	17.6767	16.5391	17.2839	17.8053	16.9851	16.5647	NAK protein kinase (1329 nt)	2384	1329	63.28
TCONS_00001223	XLOC_001155	NA	MGG_15295	TSS1187	=	MGG_15295T0	supercont8.1:7433335-7436828	2892	3.51386	3.95604	4.06001	2.9309	3.55066	4.80095	3.6549	3.41226	hypothetical protein (2892 nt)	2892	2892	50.9
TCONS_00001224	XLOC_001156	NA	MGG_04419	TSS1188	=	MGG_04419T0	supercont8.1:7437667-7441657	1620	0.291745	2.05672	0.213019	0.166427	0.495789	2.08766	2.09085	1.99165	acetylcholinesterase (1620 nt)	1620	1620	61.42
TCONS_00001227	XLOC_001159	NA	MGG_16528	TSS1191	=	MGG_16528T0	supercont8.1:7445412-7446418	928	7.47612	5.61835	8.3445	7.44281	6.64104	5.48712	5.06313	6.30479	hypothetical protein (372 nt)	928	372	53.76
TCONS_00001229	XLOC_001160	NA	MGG_04406	TSS1192	=	MGG_04406T0	supercont8.1:7454976-7463665	8595	1.20744	3.09824	1.1749	1.24208	1.20534	2.91742	3.27537	3.10192	hypothetical protein (8019 nt)	8595	8019	54.84
TCONS_00001230	XLOC_001161	NA	TIF1	TSS1193	=	MGG_04400T0	supercont8.1:7470658-7473032	1950	543.328	434.516	548.868	543.443	537.672	445.624	427.961	429.964	ATP-dependent RNA helicase eIF4A (1191 nt)	1950	1191	57.09
TCONS_00001231	XLOC_001162	NA	MGG_04399	TSS1194	=	MGG_04399T0	supercont8.1:7473306-7476901	1552	19.647	21.1267	19.9289	19.6906	19.3215	24.1225	19.7264	19.531	hypothetical protein (999 nt)	1552	999	59.36
TCONS_00001232	XLOC_001163	NA	MGG_04396	TSS1195	=	MGG_04396T0	supercont8.1:7481333-7490369	3648	131.411	126.801	137.867	130.162	126.204	131.098	126.264	123.042	valyl-tRNA synthetase (3300 nt)	3648	3300	54.82
TCONS_00001233	XLOC_001164	NA	MGG_04394	TSS1196	=	MGG_04394T0	supercont8.1:7491906-7493847	1152	0	0.240951	0	0	0	0.244308	0.239434	0.239111	hypothetical protein (1014 nt)	1152	1014	55.23
TCONS_00001236	XLOC_001167	NA	MGG_04404	TSS1199	=	MGG_04404T0	supercont8.1:7503844-7505783	1774	6.40658	53.9772	8.04491	5.55715	5.61769	65.0068	46.9721	49.9526	pisatin demethylase (1557 nt)	1774	1557	64.23
TCONS_00001237	XLOC_001168	NA	MGG_16534	TSS1200	=	MGG_16534T0	supercont8.1:7511532-7513295	1302	5.86948	4.48494	5.08274	6.35599	6.16971	4.43491	4.80262	4.21729	hypothetical protein (1242 nt)	1302	1242	59.34
TCONS_00001238	XLOC_001169	NA	MGG_16535	TSS1201	=	MGG_16535T0	supercont8.1:7521618-7522504	886	3.44026	1.33738	3.82649	2.51736	3.97693	1.56025	1.45868	0.993216	hypothetical protein (675 nt)	886	675	54.81
TCONS_00001240	XLOC_001171	NA	MGG_16538	TSS1203	=	MGG_16538T0	supercont8.1:7547858-7549533	1485	0	0.0493645	0	0	0	0.0770783	0.0355315	0.0354835	hypothetical protein (1485 nt)	1485	1485	66.13
TCONS_00001241	XLOC_001172	NA	MGG_16539	TSS1204	=	MGG_16539T0	supercont8.1:7550151-7550958	807	0.171669	0.747705	0	0.258405	0.256601	0.59785	0.523972	1.12129	hypothetical protein (807 nt)	807	807	64.06
TCONS_00001244	XLOC_001175	NA	MGG_08611	TSS1207	=	MGG_08611T0	supercont8.1:7569174-7570836	1581	11.1555	17.2245	11.0186	10.8371	11.6108	18.6582	15.9075	17.1079	hypothetical protein (1581 nt)	1581	1581	65.72
TCONS_00001245	XLOC_001176	NA	MGG_08612	TSS1208	=	MGG_08612T0	supercont8.1:7571567-7573511	1881	0.526243	0.567136	0.504604	0.468866	0.605261	0.505596	0.815678	0.380134	hypothetical protein (1851 nt)	1881	1851	69.48
TCONS_00001246	XLOC_001177	NA	MGG_14264	TSS1209	=	MGG_14264T0	supercont8.1:7578502-7580664	2038	17.2085	35.769	18.8445	16.1703	16.6108	38.2788	34.7488	34.2795	cytochrome b2 (1530 nt)	2038	1530	58.76
TCONS_00001247	XLOC_001178	NA	MGG_08615	TSS1210	=	MGG_08615T0	supercont8.1:7580978-7586735	1294	19.9926	29.6033	21.6251	19.4946	18.8582	33.0487	28.1079	27.6534	dihydrodipicolinate synthase (990 nt)	1294	990	63.33
TCONS_00001248	XLOC_001179	NA	MGG_08617	TSS1211	=	MGG_08617T0	supercont8.1:7580978-7586735	1883	6.4763	6.09852	8.74521	4.91726	5.76641	7.03362	5.187	6.07494	H(+)/hexose cotransporter 1 (1656 nt)	1883	1656	58.7
TCONS_00001249	XLOC_001180	NA	MGG_08618	TSS1212	=	MGG_08618T0	supercont8.1:7586811-7591120	4045	10.3841	14.7662	11.4711	9.83432	9.84699	16.2833	13.8625	14.1529	hypothetical protein (2430 nt)	4045	2430	56.5
TCONS_00001250	XLOC_001181	NA	MGG_08619	TSS1213	=	MGG_08619T0	supercont8.1:7591660-7592836	1077	23.2204	24.3149	24.9023	23.3958	21.3631	25.3846	24.2634	23.2967	aryl-alcohol dehydrogenase (1077 nt)	1077	1077	60.45
TCONS_00001251	XLOC_001182	NA	MGG_08620	TSS1214	=	MGG_08620T0	supercont8.1:7594427-7596364	1803	2.66792	2.61992	2.41863	2.85136	2.73377	2.50437	2.36613	2.98925	peptide transporter PTR2-A (1803 nt)	1803	1803	59.84
TCONS_00001252	XLOC_001183	NA	MGG_08621	TSS1215	=	MGG_08621T0	supercont8.1:7596644-7603752	762	8.07822	9.65793	8.6549	9.90174	5.67801	9.19447	9.69445	10.0849	hypothetical protein (654 nt)	762	654	63.61
TCONS_00001253	XLOC_001184	NA	MGG_08623	TSS1216	=	MGG_08623T0	supercont8.1:7596644-7603752	3323	47.523	55.2676	48.4402	47.1543	46.9746	55.1705	53.8084	56.8238	neutral alpha-glucosidase AB (2943 nt)	3323	2943	56.61
TCONS_00001254	XLOC_001185	NA	MGG_08626	TSS1217	=	MGG_08626T0	supercont8.1:7606613-7610429	2128	10.9432	8.22534	10.6981	11.7654	10.3662	8.0185	8.78536	7.87215	tRNA pseudouridine synthase B (1512 nt)	2128	1512	59.06
TCONS_00001255	XLOC_001185	NA	MGG_08626	TSS1218	=	MGG_08626T1	supercont8.1:7606613-7610429	1568	5.98495	4.66226	6.1386	5.25675	6.55949	3.70608	4.55908	5.72163	tRNA pseudouridine synthase B, variant (1494 nt)	1568	1494	58.77
TCONS_00001257	XLOC_001187	NA	MGG_08633	TSS1220	=	MGG_08633T0	supercont8.1:7626399-7627208	672	2.61209	0.634048	2.88343	1.98946	2.96339	0.654921	0.576055	0.671168	hypothetical protein (672 nt)	672	672	52.08
TCONS_00001258	XLOC_001188	NA	MGG_16542	TSS1221	=	MGG_16542T0	supercont8.1:7627398-7629344	190	43.6676	64.7895	22.7899	41.7987	66.4141	87.3392	40.6517	66.3776	hypothetical protein (189 nt)	190	189	54.5
TCONS_00001259	XLOC_001189	NA	MGG_08637	TSS1222	=	MGG_08637T0	supercont8.1:7633087-7635226	2016	46.5911	27.4361	54.0673	44.6257	41.0804	31.6162	25.5016	25.1905	mitochondrial import receptor subunit tom-40 (1068 nt)	2016	1068	57.3
TCONS_00001260	XLOC_001190	NA	MGG_08638	TSS1223	=	MGG_08638T0	supercont8.1:7635944-7639885	3609	16.3094	17.512	17.2032	16.0451	15.6798	18.5	17.4859	16.5501	ubiquitin C-terminal hydrolase (2676 nt)	3609	2676	53.51
TCONS_00001261	XLOC_001191	NA	MGG_08639	TSS1224	=	MGG_08639T0	supercont8.1:7640436-7643427	1263	113.024	196.463	114.972	112.517	111.583	198.247	195.382	195.761	hypothetical protein (645 nt)	1263	645	50.23
TCONS_00001262	XLOC_001192	NA	CWC2	TSS1225	=	MGG_08641T0	supercont8.1:7643598-7646263	1482	11.3726	14.6024	12.3886	10.8109	10.9182	15.4773	14.1033	14.2265	pre-mRNA-splicing factor CWC2 (1185 nt)	1482	1185	58.73
TCONS_00001263	XLOC_001193	NA	MGG_08643	TSS1226	=	MGG_08643T0	supercont8.1:7650667-7656049	5382	18.3451	25.9289	20.2157	17.433	17.3865	28.0599	25.0967	24.63	PEK/GCN2 protein kinase (5040 nt)	5382	5040	53.67
TCONS_00001264	XLOC_001194	NA	MGG_08644	TSS1227	=	MGG_08644T0	supercont8.1:7657300-7658142	842	3.02975	1.28692	4.21876	2.322	2.5485	1.66761	0.778888	1.41426	DNase1 protein (588 nt)	842	588	61.56
TCONS_00001265	XLOC_001195	NA	MGG_08646	TSS1228	=	MGG_08646T0	supercont8.1:7663036-7666951	3719	10.5211	21.3505	11.1357	9.95909	10.4684	23.7586	19.9457	20.3473	DNA replication licensing factor mcm5 (2163 nt)	3719	2163	53.91
TCONS_00001266	XLOC_001196	NA	MGG_08647	TSS1229	=	MGG_08647T0	supercont8.1:7667173-7668680	1420	1.32952	1.82184	1.41438	1.54884	1.02534	2.36208	1.57147	1.53198	hypothetical protein (1158 nt)	1420	1158	66.06
TCONS_00001267	XLOC_001197	NA	MGG_14269	TSS1230	=	MGG_14269T0	supercont8.1:7670631-7672023	1292	1150.96	115.765	660.495	1421.73	1370.64	71.8701	134.027	141.398	hypothetical protein (1152 nt)	1292	1152	66.23
TCONS_00001268	XLOC_001198	NA	MGG_08649	TSS1231	=	MGG_08649T0	supercont8.1:7677051-7678512	1393	358.943	504.608	391.13	339.121	346.579	527.155	489.903	496.767	farnesyl pyrophosphate synthase (1047 nt)	1393	1047	55.59
TCONS_00001269	XLOC_001199	NA	MGG_08651	TSS1232	=	MGG_08651T0	supercont8.1:7679909-7685757	4801	9.56096	9.93061	9.71486	9.97051	8.9975	10.423	9.56666	9.80219	ankyrin repeatl protein (4080 nt)	4801	4080	52.43
TCONS_00001270	XLOC_001200	NA	MGG_08654	TSS1233	=	MGG_08654T0	supercont8.1:7690787-7693468	2560	12.6302	17.581	11.7123	13.0019	13.1764	16.1489	18.5129	18.0813	hypothetical protein (1866 nt)	2560	1866	52.73
TCONS_00001271	XLOC_001201	NA	MGG_08655	TSS1234	=	MGG_08655T0	supercont8.1:7695130-7696622	1392	3.56101	2.58932	3.44304	3.69851	3.54148	2.64031	2.68034	2.44729	hypothetical protein (1179 nt)	1392	1179	61.83
TCONS_00001272	XLOC_001202	NA	MGG_08657	TSS1235	=	MGG_08657T0	supercont8.1:7702338-7703053	624	0	0.139595	0	0	0	0.205458	0.106735	0.106593	hypothetical protein (624 nt)	624	624	60.58
TCONS_00001273	XLOC_001203	NA	MGG_08661	TSS1236	=	MGG_08661T0	supercont8.1:7710123-7712129	1735	68.4182	74.2832	68.981	68.7342	67.5396	72.4568	74.1468	76.246	acyl-CoA dehydrogenase family member 11 (1359 nt)	1735	1359	63.94
TCONS_00001274	XLOC_001204	NA	MGG_08663	TSS1237	=	MGG_08663T0	supercont8.1:7718822-7722607	2989	28.2149	33.4274	25.8412	28.6875	30.116	30.7038	35.0835	34.495	hypothetical protein (2409 nt)	2989	2409	53.88
TCONS_00001275	XLOC_001205	NA	MGG_14426	TSS1238	=	MGG_14426T0	supercont8.1:7723770-7724748	799	3.25293	0.599609	2.97774	3.01103	3.77002	0.510401	0.606748	0.681677	hypothetical protein (630 nt)	799	630	65.87
TCONS_00001276	XLOC_001206	NA	MGG_14424	TSS1239	=	MGG_14424T0	supercont8.1:7727408-7727796	204	1.51099	0	0	4.53298	0	0	0	0	hypothetical protein (204 nt)	204	204	43.14
TCONS_00001279	XLOC_001209	NA	MGG_15416	TSS1242	=	MGG_15416T0	supercont8.1:7779653-7780418	633	40.9169	112.719	46.2659	40.4453	36.0395	125.336	109.982	102.84	hypothetical protein (633 nt)	633	633	56.87
TCONS_00001280	XLOC_001210	NA	MGG_16548	TSS1243	=	MGG_16548T0	supercont8.1:7781354-7785531	452	0.204521	3.58384	0	0.30785	0.305714	5.41605	2.13587	3.19961	hypothetical protein (234 nt)	452	234	44.87
TCONS_00001281	XLOC_001211	NA	MGG_08682	TSS1244	=	MGG_08682T0	supercont8.1:7781354-7785531	684	41.7866	9.42286	46.7142	39.7826	38.8629	10.8601	8.71003	8.69841	hypothetical protein (684 nt)	684	684	54.09
TCONS_00001282	XLOC_001212	NA	MGG_08683	TSS1245	=	MGG_08683T0	supercont8.1:7786498-7788657	2109	86.183	52.092	82.6086	88.0117	87.9288	48.545	52.6933	55.0377	hypothetical protein (1335 nt)	2109	1335	49.74
TCONS_00001283	XLOC_001213	NA	MGG_08684	TSS1246	=	MGG_08684T0	supercont8.1:7789977-7790424	447	14.8934	11.2076	14.0227	14.7563	15.9011	9.49758	12.1613	11.9641	hypothetical protein (447 nt)	447	447	55.93
TCONS_00001284	XLOC_001214	NA	MGG_16549	TSS1247	=	MGG_16549T0	supercont8.1:7792128-7792815	687	85.5982	96.9415	82.0438	88.2416	86.5091	90.1773	96.5301	104.117	hypothetical protein (687 nt)	687	687	54.44
TCONS_00001285	XLOC_001215	NA	MGG_16550	TSS1248	=	MGG_16550T0	supercont8.1:7793062-7793722	660	28.236	34.6581	32.6686	27.5512	24.4882	35.2767	35.9464	32.7513	hypothetical protein (660 nt)	660	660	55.61
TCONS_00001293	XLOC_001223	NA	MGG_16557	TSS1256	=	MGG_16557T0	supercont8.1:7837938-7839438	1188	0.295774	0.834489	0.331676	0.318466	0.23718	0.981826	0.50767	1.01397	hypothetical protein (1188 nt)	1188	1188	54.88
TCONS_00001294	XLOC_001224	NA	MGG_16558	TSS1257	=	MGG_16558T0	supercont8.1:7841639-7842821	1182	0.580637	0.243244	0.623303	0.720906	0.397703	0.311969	0.325026	0.0927392	hypothetical protein (1086 nt)	1182	1086	60.22
TCONS_00001297	XLOC_001227	NA	MGG_15420	TSS1260	=	MGG_15420T0	supercont8.1:7870526-7871132	519	0.324387	0.0925552	0	0.488279	0.484884	0.13641	0.141256	0	hypothetical protein (513 nt)	519	513	53.02
TCONS_00001298	XLOC_001228	NA	MGG_14358	TSS1261	=	MGG_14358T0	supercont8.1:7880753-7885267	1782	0.416292	1.9712	0.503787	0.448308	0.29678	1.92985	2.25301	1.73073	hypothetical protein (915 nt)	1782	915	52.9
TCONS_00001299	XLOC_001229	NA	MGG_10925	TSS1262	=	MGG_10925T0	supercont8.1:7886880-7888802	1837	25.8451	35.9002	22.6577	26.7676	28.1101	31.9271	38.5541	37.2194	hypothetical protein (1644 nt)	1837	1644	54.32
TCONS_00001306	XLOC_001236	NA	MGG_16571	TSS1269	=	MGG_16571T0	supercont8.1:7922815-7923803	753	0.915496	0.523496	0.909182	1.13369	0.703614	0.176081	0.57462	0.819788	hypothetical protein (468 nt)	753	468	59.19
TCONS_00001313	XLOC_001242	NA	MGG_16577	TSS1276	=	MGG_16577T0	supercont8.1:7962058-7962844	567	3.72068	2.16302	3.53449	3.82709	3.80045	1.69374	1.72286	3.07246	conserved hypothetical protein (567 nt)	567	567	60.14
TCONS_00001314	XLOC_001243	NA	MGG_16579	TSS1277	=	MGG_16579T0	supercont8.1:7969268-7973610	3852	0.149526	0.0856791	0.190113	0.129687	0.128779	0.0565522	0.11284	0.0876451	hypothetical protein (3852 nt)	3852	3852	59.11
TCONS_00001320	XLOC_001249	NA	MGG_15983	TSS1283	=	MGG_15983T0	supercont8.1:33715-34568	657	1.34518	0.0652257	1.64866	1.02705	1.35985	0.0966872	0	0.0989899	hypothetical protein (657 nt)	657	657	63.47
TCONS_00001321	XLOC_001250	NA	MGG_01949	TSS1284	=	MGG_01949T0	supercont8.1:42734-45926	2889	0.0387743	0	0.0576396	0.0586833	0	0	0	0	ent-kaurene synthase (2889 nt)	2889	2889	61.51
TCONS_00001322	XLOC_001251	NA	MGG_01951	TSS1285	=	MGG_01951T0	supercont8.1:49166-51270	1749	0	0.263475	0	0	0	0.141953	0.294978	0.353494	4-coumarate-CoA ligase 2 (1749 nt)	1749	1749	58.15
TCONS_00001323	XLOC_001252	NA	MGG_01961	TSS1286	=	MGG_01961T0	supercont8.1:54401-55933	1532	0.13543	0.463834	0.0527649	0.177384	0.176143	0.569172	0.479963	0.342367	UDP-glucuronosyl/UDP-glucosyltransferase (1389 nt)	1532	1389	65.3
TCONS_00001324	XLOC_001253	NA	MGG_15985	TSS1287	=	MGG_15985T0	supercont8.1:56505-56850	345	0.350669	0.108775	0	0.527822	0.524187	0.326324	0	0	hypothetical protein (345 nt)	345	345	59.13
TCONS_00001325	XLOC_001254	NA	MGG_01964	TSS1288	=	MGG_01964T0	supercont8.1:60951-61425	474	0	0.0546622	0	0	0	0	0.163987	0	hypothetical protein (474 nt)	474	474	52.32
TCONS_00001326	XLOC_001255	NA	MGG_13662	TSS1289	=	MGG_13662T0	supercont8.1:64387-66316	1788	0	0.00959198	0	0	0	0	0.0287759	0	4-coumarate-CoA ligase 2 (1788 nt)	1788	1788	59.4
TCONS_00001329	XLOC_001258	NA	MGG_15987	TSS1292	=	MGG_15987T0	supercont8.1:78451-80047	1362	0.315677	0.0654043	0.338292	0.474202	0.134539	0	0.0785488	0.117664	hypothetical protein (1095 nt)	1362	1095	53.33
TCONS_00001330	XLOC_001259	NA	MGG_01969	TSS1293	=	MGG_01969T0	supercont8.1:80655-85619	4755	14.1886	20.9595	14.5706	13.3472	14.648	20.6848	21.2871	20.9067	hypothetical protein (4755 nt)	4755	4755	53.52
TCONS_00001331	XLOC_001260	NA	MGG_01970	TSS1294	=	MGG_01970T0	supercont8.1:85946-89134	3030	54.7125	53.9704	59.6139	52.1955	52.3283	56.7511	51.8482	53.312	acetylornithine deacetylase (1311 nt)	3030	1311	51.33
TCONS_00001332	XLOC_001261	NA	MGG_01971	TSS1295	=	MGG_01971T0	supercont8.1:93635-94806	1125	7.15161	9.42024	8.40703	6.80091	6.24687	9.69632	9.16535	9.39904	type-1 protein geranylgeranyltransferase subunit beta (1125 nt)	1125	1125	56.44
TCONS_00001333	XLOC_001262	NA	MGG_01973	TSS1296	=	MGG_01973T0	supercont8.1:95221-100637	3486	16.7253	24.763	17.0498	16.7409	16.3852	25.185	24.4086	24.6954	hypothetical protein (3027 nt)	3486	3027	51.77
TCONS_00001334	XLOC_001263	NA	MGG_01976	TSS1297	=	MGG_01976T0	supercont8.1:107202-110844	3584	90.3693	75.6928	81.0315	95.5349	94.5415	66.261	79.4291	81.3883	TBC1 domain family member 14 (2301 nt)	3584	2301	55.71
TCONS_00001335	XLOC_001264	NA	MGG_01977	TSS1298	=	MGG_01977T0	supercont8.1:112792-115063	2208	27.1556	24.7488	24.4125	28.6665	28.3879	22.5834	26.7366	24.9264	hypothetical protein (1536 nt)	2208	1536	55.47
TCONS_00001336	XLOC_001265	NA	PRT1	TSS1299	=	MGG_01978T0	supercont8.1:115525-118721	3044	135.992	119.704	139.607	133.066	135.302	124.286	117.139	117.687	eukaryotic translation initiation factor 3 subunit B (2241 nt)	3044	2241	55.47
TCONS_00001337	XLOC_001266	NA	MGG_14619	TSS1300	=	MGG_14619T0	supercont8.1:144275-144978	622	1.47361	0.6071	1.28509	1.29649	1.83923	0.642578	0.536172	0.642551	hypothetical protein (294 nt)	622	294	53.06
TCONS_00001338	XLOC_001267	NA	MGG_01986	TSS1301	=	MGG_01986T0	supercont8.1:147758-149074	999	12.5761	19.8639	12.9393	11.8989	12.89	17.5594	21.2011	20.8311	hypothetical protein (999 nt)	999	999	64.16
TCONS_00001339	XLOC_001268	NA	MGG_01987	TSS1302	=	MGG_01987T0	supercont8.1:149799-152969	3170	24.7731	24.5995	25.7362	24.0724	24.5106	25.1314	24.5194	24.1475	C2H2 finger domain-containing protein (2550 nt)	3170	2550	58.86
TCONS_00001340	XLOC_001269	NA	MGG_01988	TSS1303	=	MGG_01988T0	supercont8.1:153236-155718	2210	70.9412	39.2359	72.9996	68.5352	71.2888	40.8819	39.1778	37.6479	hypothetical protein (858 nt)	2210	858	55.83
TCONS_00001341	XLOC_001270	NA	MGG_13670	TSS1304	=	MGG_13670T0	supercont8.1:156597-157205	366	0	0.0889401	0	0	0	0	0	0.26682	hypothetical protein (366 nt)	366	366	51.37
TCONS_00001342	XLOC_001271	NA	MGG_01990	TSS1305	=	MGG_01990T0	supercont8.1:158543-161785	1504	241.099	591.706	247.625	238.129	237.543	611.758	583.753	579.606	IDI4 (624 nt)	1504	624	56.89
TCONS_00001343	XLOC_001272	NA	MGG_01993	TSS1306	=	MGG_01993T0	supercont8.1:167121-167618	306	33.2744	1223.12	38.6179	36.3975	24.8077	1277.11	1150.28	1241.96	hypothetical protein (306 nt)	306	306	59.48
TCONS_00001344	XLOC_001273	NA	MGG_01994	TSS1307	=	MGG_01994T0	supercont8.1:168258-170019	1761	26.7922	39.4318	29.5159	26.0982	24.7627	42.8241	38.5218	36.9495	hypothetical protein (804 nt)	1761	804	59.08
TCONS_00001345	XLOC_001274	NA	MGG_01997	TSS1308	=	MGG_01997T0	supercont8.1:172285-178412	1301	4.04115	0.262334	3.93763	3.28813	4.89768	0.165916	0.248636	0.37245	hypothetical protein (987 nt)	1301	987	57.65
TCONS_00001347	XLOC_001276	NA	MGG_02000	TSS1310	=	MGG_02000T0	supercont8.1:182601-190885	1997	29.1765	10.6755	31.5379	27.1543	28.8374	12.0701	9.89602	10.0604	hypothetical protein (1416 nt)	1997	1416	61.94
TCONS_00001348	XLOC_001277	NA	MGG_15994	TSS1311	=	MGG_15994T0	supercont8.1:209620-213918	2252	157.933	26.4689	169.755	150.565	153.48	27.7135	25.8975	25.7956	hypothetical protein (2193 nt)	2252	2193	50.02
TCONS_00001349	XLOC_001278	NA	MGG_02009	TSS1312	=	MGG_02009T0	supercont8.1:214550-219811	3173	3.80968	10.2199	4.07811	3.37099	3.97996	11.0892	9.9457	9.62469	hypothetical protein (2880 nt)	3173	2880	49.79
TCONS_00001359	XLOC_001288	NA	MGG_14612	TSS1322	=	MGG_14612T0	supercont8.1:268214-271171	2582	0.565986	0.0389055	0.673918	0.662316	0.361723	0.0591227	0.0384133	0.0191806	hypothetical protein (1245 nt)	2582	1245	50.76
TCONS_00001364	XLOC_001293	NA	MGG_02036	TSS1327	=	MGG_02036T0	supercont8.1:315504-318750	2881	26.7688	39.8007	24.8172	28.4579	27.0312	37.4743	41.3756	40.5523	hypothetical protein (2031 nt)	2881	2031	51.99
TCONS_00001367	XLOC_001296	NA	MGG_13691	TSS1330	=	MGG_13691T0	supercont8.1:340062-342518	2013	87.8897	54.8837	90.0897	87.1811	86.3982	53.9029	55.147	55.6011	hypothetical protein (2013 nt)	2013	2013	50.02
TCONS_00001368	XLOC_001297	NA	MGG_02042	TSS1331	=	MGG_02042T0	supercont8.1:347807-351037	2082	0.0314225	0.058702	0.0523759	0.0418917	0	0.0304072	0.0971764	0.0485223	interferon-induced GTP-binding protein Mx2 (2082 nt)	2082	2082	47.31
TCONS_00001369	XLOC_001298	NA	MGG_16011	TSS1332	=	MGG_16011T0	supercont8.1:354639-354964	177	0	9.66089	0	0	0	15.9354	13.0473	0	hypothetical protein (177 nt)	177	177	56.5
TCONS_00001370	XLOC_001299	NA	MGG_16012	TSS1333	=	MGG_16012T0	supercont8.1:355366-356151	686	26.5197	10.7614	31.259	22.8704	25.4298	11.1277	8.48805	12.6685	hypothetical protein (609 nt)	686	609	44.66
TCONS_00001371	XLOC_001300	NA	MGG_16014	TSS1334	=	MGG_16014T0	supercont8.1:363620-364385	765	0.287835	0.0300161	0.312471	0	0.551036	0.0900484	0	0	hypothetical protein (765 nt)	765	765	48.76
TCONS_00001372	XLOC_001301	NA	MGG_14609	TSS1335	=	MGG_14609T0	supercont8.1:381702-383049	1347	15.3466	17.1325	15.9487	15.3035	14.7876	15.8141	17.4261	18.1574	hypothetical protein (1071 nt)	1347	1071	46.41
TCONS_00001373	XLOC_001302	NA	MGG_02049	TSS1336	=	MGG_02049T0	supercont8.1:384778-387021	2139	0.0289778	0.0567508	0.0462703	0.0406632	0	0.0524383	0.047164	0.0706501	interferon-induced GTP-binding protein Mx2 (2136 nt)	2139	2136	52.06
TCONS_00001375	XLOC_001304	NA	MGG_02050	TSS1338	=	MGG_02050T0	supercont8.1:391151-392821	1670	43.151	62.0201	37.1684	45.8237	46.461	55.253	65.1374	65.6699	hypothetical protein (1110 nt)	1670	1110	55.86
TCONS_00001376	XLOC_001305	NA	MGG_16019	TSS1339	=	MGG_16019T0	supercont8.1:403750-404557	807	0.716525	0.808482	0.475356	0.904417	0.769804	0.854431	0.898238	0.672776	hypothetical protein (807 nt)	807	807	62.45
TCONS_00001378	XLOC_001307	NA	MGG_16021	TSS1341	=	MGG_16021T0	supercont8.1:407926-410609	2461	22.2772	26.3265	22.2042	21.3492	23.2781	26.6147	25.816	26.5487	hypothetical protein (903 nt)	2461	903	48.39
TCONS_00001379	XLOC_001308	NA	MGG_16022	TSS1342	=	MGG_16022T0	supercont8.1:410854-411153	299	3.76143	1.0244	6.71858	3.8091	0.756613	0.884298	0.876213	1.3127	hypothetical protein (240 nt)	299	240	58.75
TCONS_00001380	XLOC_001309	NA	MGG_02055	TSS1343	=	MGG_02055T0	supercont8.1:412176-414468	2161	22.4309	88.2166	20.4932	23.6022	23.1974	78.0897	94.019	92.5409	hypothetical protein (1848 nt)	2161	1848	49.51
TCONS_00001381	XLOC_001310	NA	MGG_13697	TSS1344	=	MGG_13697T0	supercont8.1:419223-420823	1600	41.3377	51.3446	39.798	42.1992	42.0158	51.465	52.3625	50.2065	hypothetical protein (1065 nt)	1600	1065	47.89
TCONS_00001382	XLOC_001311	NA	MGG_02059	TSS1345	=	MGG_02059T0	supercont8.1:425503-436681	10815	1.79772	3.72801	1.78901	1.76391	1.84023	4.19404	3.34204	3.64796	hypothetical protein (8187 nt)	10815	8187	51.06
TCONS_00001383	XLOC_001312	NA	MGG_02061	TSS1346	=	MGG_02061T0	supercont8.1:438778-441375	2507	29.1784	61.9946	31.634	26.8393	29.0619	66.5328	59.4291	60.0217	CAMK protein kinase (2037 nt)	2507	2037	55.08
TCONS_00001384	XLOC_001313	NA	MGG_16024	TSS1347	=	MGG_16024T0	supercont8.1:446157-446873	249	0	1.13868	0	0	0	0.965479	0.817488	1.63307	hypothetical protein (249 nt)	249	249	47.39
TCONS_00001385	XLOC_001314	NA	MGG_16025	TSS1348	=	MGG_16025T0	supercont8.1:449319-449924	543	5.25324	18.2031	5.79061	5.45495	4.51417	19.2509	17.3623	17.9961	hypothetical protein (288 nt)	543	288	40.28
TCONS_00001387	XLOC_001315	NA	MGG_02065	TSS1349	=	MGG_02065T0	supercont8.1:451820-455035	3135	1.91759	2.54592	2.71219	0.842896	2.19767	2.6969	2.5876	2.35328	kinesin light chain (2937 nt)	3135	2937	52.16
TCONS_00001388	XLOC_001315	NA	MGG_02065	TSS1349	=	MGG_02065T1	supercont8.1:451820-455035	2490	4.63565	11.0647	4.55257	5.73974	3.61464	10.9159	11.4478	10.8303	kinesin light chain, variant (2490 nt)	2490	2490	53.01
TCONS_00001390	XLOC_001317	NA	MGG_02070	TSS1351	=	MGG_02070T0	supercont8.1:472721-477722	3962	3.98167	1.42116	4.79532	3.37832	3.77138	1.73361	1.18066	1.34922	hypothetical protein (546 nt)	3962	546	54.21
TCONS_00001392	XLOC_001319	NA	MGG_02074	TSS1353	=	MGG_02074T0	supercont8.1:487088-491860	4315	23.9348	17.3366	22.8625	24.4614	24.4805	17.2544	17.94	16.8153	potassium/sodium efflux P-type ATPase (3291 nt)	4315	3291	62.41
TCONS_00001393	XLOC_001320	NA	MGG_02075	TSS1354	=	MGG_02075T0	supercont8.1:492449-496458	3493	0.569987	1.37423	0.682546	0.575222	0.452194	1.56634	1.33462	1.22174	sodium-dependent noradrenaline transporter (2118 nt)	3493	2118	65.16
TCONS_00001394	XLOC_001321	NA	MGG_02076	TSS1355	=	MGG_02076T1	supercont8.1:496667-498247	1382	0	0.134565	0	0	0	0.133563	0.154449	0.115683	hypothetical protein, variant (972 nt)	1382	972	59.57
TCONS_00001396	XLOC_001322	NA	MGG_02077	TSS1356	=	MGG_02077T0	supercont8.1:499116-499579	405	0.610395	0.823687	0.329069	0.753666	0.748449	0.947996	0.870807	0.652259	hypothetical protein (405 nt)	405	405	60.74
TCONS_00001398	XLOC_001324	NA	MGG_02079	TSS1358	=	MGG_02079T0	supercont8.1:503267-504241	756	0	0.0271803	0	0	0	0	0	0.0815409	hypothetical protein (756 nt)	756	756	53.31
TCONS_00001399	XLOC_001325	NA	MGG_02082	TSS1359	=	MGG_02082T0	supercont8.1:506856-510148	1432	0.758996	1.53688	0.812448	0.702997	0.761542	1.241	1.7415	1.62813	hypothetical protein (870 nt)	1432	870	60.69
TCONS_00001400	XLOC_001326	NA	MGG_02083	TSS1360	=	MGG_02083T0	supercont8.1:511329-511995	666	1.39157	1.7551	1.6679	0.839509	1.66731	1.76642	2.43076	1.06811	hypothetical protein (666 nt)	666	666	66.07
TCONS_00001401	XLOC_001327	NA	MGG_02089	TSS1361	=	MGG_02089T0	supercont8.1:520337-527617	2303	0.449653	1.11874	0.34094	0.374993	0.633025	0.900453	1.17439	1.28139	hypothetical protein (1557 nt)	2303	1557	59.67
TCONS_00001402	XLOC_001328	NA	MGG_02091	TSS1362	=	MGG_02091T0	supercont8.1:530783-532020	750	2.8794	2.72262	2.39004	3.27699	2.97116	3.46631	2.64102	2.06053	hypothetical protein (750 nt)	750	750	62.13
TCONS_00001403	XLOC_001329	NA	MGG_02093	TSS1363	=	MGG_02093T0	supercont8.1:540340-542140	1506	0.0201003	0	0	0.0603008	0	0	0	0	polyamine transporter 2 (1506 nt)	1506	1506	58.76
TCONS_00001405	XLOC_001331	NA	MGG_02100	TSS1365	=	MGG_02100T0	supercont8.1:567850-568889	879	0.115328	0.414138	0	0.231194	0.11479	0.305303	0.46887	0.46824	hypothetical protein (354 nt)	879	354	48.31
TCONS_00001406	XLOC_001332	NA	MGG_02102	TSS1366	=	MGG_02102T0	supercont8.1:571021-571407	321	14.1118	26.6362	11.631	16.971	13.7333	24.1855	28.6027	27.1204	hypothetical protein (321 nt)	321	321	52.65
TCONS_00001407	XLOC_001333	NA	MGG_14604	TSS1367	=	MGG_14604T0	supercont8.1:572122-572509	387	2.36748	3.34924	2.57954	2.88546	1.63743	3.86168	3.80867	2.37735	hypothetical protein (387 nt)	387	387	54.52
TCONS_00001408	XLOC_001334	NA	MGG_02104	TSS1368	=	MGG_02104T0	supercont8.1:574936-576784	1474	12.371	4.02845	12.3476	13.1037	11.6617	4.42127	3.94207	3.722	hypothetical protein (1248 nt)	1474	1248	63.46
TCONS_00001409	XLOC_001335	NA	MGG_02105	TSS1369	=	MGG_02105T0	supercont8.1:577570-579066	1375	76.112	42.7144	63.2386	82.0038	83.0935	35.6462	45.6393	46.8577	hypothetical protein (915 nt)	1375	915	58.14
TCONS_00001411	XLOC_001337	NA	MGG_14603	TSS1371	=	MGG_14603T0	supercont8.1:586465-588497	851	1.31215	5.39558	1.05206	1.68746	1.19692	4.95114	5.09814	6.13745	hypothetical protein (531 nt)	851	531	53.86
TCONS_00001412	XLOC_001338	NA	MGG_02112	TSS1372	=	MGG_02112T0	supercont8.1:588845-590368	1346	17.5493	12.5212	19.0399	17.1026	16.5055	13.1713	11.5478	12.8445	hypothetical protein (864 nt)	1346	864	65.28
TCONS_00001413	XLOC_001339	NA	MGG_02113	TSS1373	=	MGG_02113T0	supercont8.1:591952-593049	600	0.400174	2.37728	0.614681	0.585842	0	2.83922	1.8088	2.4838	cupin domain-containing protein (600 nt)	600	600	66.5
TCONS_00001414	XLOC_001340	NA	MGG_02114	TSS1374	=	MGG_02114T0	supercont8.1:593351-596194	2439	2.38247	20.9913	2.61678	2.60675	1.92388	21.2022	20.8184	20.9534	hypothetical protein (2439 nt)	2439	2439	53.96
TCONS_00001415	XLOC_001341	NA	MGG_02116	TSS1375	=	MGG_02116T0	supercont8.1:600519-604933	3349	0.105238	0.226735	0.115745	0.12531	0.0746592	0.229957	0.159906	0.290343	hypothetical protein (1362 nt)	3349	1362	52.94
TCONS_00001416	XLOC_001342	NA	MGG_13711	TSS1376	=	MGG_13711T0	supercont8.1:616929-618141	1212	0	0.0852317	0	0	0	0.0755631	0.0901268	0.0900052	hypothetical protein (1212 nt)	1212	1212	64.77
TCONS_00001417	XLOC_001343	NA	MGG_02121	TSS1377	=	MGG_02121T0	supercont8.1:626617-627754	1056	0.0610035	0.278015	0	0.0918262	0.0911845	0.142589	0.372554	0.318902	hypothetical protein (1056 nt)	1056	1056	50.85
TCONS_00001418	XLOC_001344	NA	MGG_02122	TSS1378	=	MGG_02122T0	supercont8.1:628535-630649	2114	22.602	55.4156	23.2679	22.3678	22.1703	57.4586	53.87	54.9182	hypothetical protein (1728 nt)	2114	1728	55.5
TCONS_00001419	XLOC_001345	NA	MGG_02124	TSS1379	=	MGG_02124T0	supercont8.1:635262-639940	4456	3.00923	5.95045	3.11246	2.94953	2.96571	7.01189	5.39116	5.44831	potassium uptake protein (2697 nt)	4456	2697	63.4
TCONS_00001420	XLOC_001346	NA	MGG_02125	TSS1380	=	MGG_02125T0	supercont8.1:640258-642154	1728	193.55	61.3203	197.882	190.798	191.972	60.9405	60.2221	62.7982	branched-chain-amino-acid aminotransferase 1 (1161 nt)	1728	1161	57.45
TCONS_00001421	XLOC_001347	NA	MGG_02127	TSS1381	=	MGG_02127T0	supercont8.1:647894-650859	2243	36.5572	173.991	38.5456	36.8225	34.3034	181.036	170.864	170.073	alcohol oxidase (1956 nt)	2243	1956	65.39
TCONS_00001422	XLOC_001348	NA	MGG_02128	TSS1382	=	MGG_02128T0	supercont8.1:651581-653651	1695	0.20024	0.553919	0.286722	0	0.313997	0.684231	0.702863	0.274661	hypothetical protein (1695 nt)	1695	1695	62.95
TCONS_00001423	XLOC_001349	NA	MGG_02130	TSS1383	=	MGG_02130T0	supercont8.1:663504-665361	1704	0.0696052	0.697953	0	0.104774	0.104041	0.879681	0.546788	0.667391	lipase 2 (1704 nt)	1704	1704	65.85
TCONS_00001424	XLOC_001350	NA	MGG_02134	TSS1384	=	MGG_02134T0	supercont8.1:675635-680457	1816	1.70192	3.20814	1.50757	2.09698	1.5012	3.54821	3.28037	2.79584	gamma-glutamyltransferase (1701 nt)	1816	1701	65.31
TCONS_00001428	XLOC_001354	NA	MGG_16043	TSS1388	=	MGG_16043T0	supercont8.1:726971-727619	648	0	0.376193	0	0	0	0.320006	0.70762	0.100954	hypothetical protein (648 nt)	648	648	64.35
TCONS_00001429	XLOC_001355	NA	MGG_16044	TSS1389	=	MGG_16044T0	supercont8.1:729252-730609	1239	0.168043	0.813991	0.125497	0.378631	0	0.424055	0.965771	1.05215	hypothetical protein (1239 nt)	1239	1239	67.72
TCONS_00001430	XLOC_001356	NA	MGG_02154	TSS1390	=	MGG_02154T0	supercont8.1:747990-748317	327	0	1.15804	0	0	0	0.709905	1.72845	1.03576	hypothetical protein (327 nt)	327	327	58.41
TCONS_00001431	XLOC_001357	NA	MGG_02156	TSS1391	=	MGG_02156T0	supercont8.1:751152-755657	2688	164.599	27.9268	164.027	163.509	166.261	27.9417	27.3979	28.441	iron transport multicopper oxidase FET5 (1800 nt)	2688	1800	61.61
TCONS_00001433	XLOC_001357	NA	MGG_02157	TSS1392	=	MGG_02157T0	supercont8.1:751152-755657	1627	300.076	55.1645	338.129	286.046	276.053	63.9934	49.8157	51.6845	hypothetical protein (1155 nt)	1627	1155	55.76
TCONS_00001434	XLOC_001358	NA	MGG_02160	TSS1393	=	MGG_02160T0	supercont8.1:761839-764165	1997	1.52348	1.26598	1.85982	1.40378	1.30683	1.51006	1.04303	1.24485	hypothetical protein (1503 nt)	1997	1503	62.34
TCONS_00001437	XLOC_001361	NA	MGG_02169	TSS1396	=	MGG_02169T0	supercont8.1:781901-786889	1653	5.33306	7.55047	5.19088	5.7473	5.061	7.44079	8.1113	7.09932	hypothetical protein (1287 nt)	1653	1287	65.97
TCONS_00001439	XLOC_001361	NA	MGG_13732	TSS1397	=	MGG_13732T0	supercont8.1:781901-786889	1179	1.37501	0.543334	2.04449	0.883788	1.19674	0.637373	0.605453	0.387177	hypothetical protein (1179 nt)	1179	1179	60.22
TCONS_00001440	XLOC_001362	NA	MGG_16045	TSS1398	=	MGG_16045T0	supercont8.1:789135-789760	625	12.7417	4.43588	13.8432	13.0584	11.3236	4.58118	4.57896	4.14748	hypothetical protein (261 nt)	625	261	62.45
TCONS_00001442	XLOC_001364	NA	MGG_16047	TSS1400	=	MGG_16047T0	supercont8.1:806974-807997	876	6.42604	6.54973	11.6402	4.06373	3.57417	11.5135	4.64205	3.49366	hypothetical protein (264 nt)	876	264	49.62
TCONS_00001445	XLOC_001367	NA	MGG_02180	TSS1403	=	MGG_02180T0	supercont8.1:864635-865555	753	14.5464	14.1911	14.6841	15.3048	13.6501	14.5173	14.2834	13.7724	hypothetical protein (354 nt)	753	354	59.89
TCONS_00001447	XLOC_001369	NA	MGG_02183	TSS1405	=	MGG_02183T0	supercont8.1:871132-877687	6555	7.54889	8.64421	7.42437	7.89178	7.33051	8.23744	8.89684	8.79834	helicase swr-1 (5739 nt)	6555	5739	53.77
TCONS_00001448	XLOC_001370	NA	MGG_02188	TSS1406	=	MGG_02188T0	supercont8.1:891961-893720	1680	0	0.0522985	0	0	0	0.0335496	0.0308678	0.0924781	glutamyl-tRNA(Gln) amidotransferase subunit A (1680 nt)	1680	1680	66.31
TCONS_00001449	XLOC_001371	NA	MGG_16055	TSS1407	=	MGG_16055T0	supercont8.1:895317-896065	665	7.8794	1.25335	7.37922	7.4034	8.85558	1.32594	1.07181	1.3623	hypothetical protein (327 nt)	665	327	49.85
TCONS_00001450	XLOC_001372	NA	MGG_02191	TSS1408	=	MGG_02191T0	supercont8.1:904080-905420	1340	3.48907	3.50181	3.58685	3.45225	3.42811	3.86501	3.44246	3.19796	hypothetical protein (1011 nt)	1340	1011	61.42
TCONS_00001451	XLOC_001373	NA	MGG_16056	TSS1409	=	MGG_16056T0	supercont8.1:916352-917144	624	3.21958	1.11666	2.48966	4.24004	2.92904	1.11024	0.960617	1.27912	hypothetical protein (624 nt)	624	624	59.46
TCONS_00001452	XLOC_001374	NA	MGG_16058	TSS1410	=	MGG_16058T0	supercont8.1:922874-924448	339	0	0.307181	0	0	0	0.604521	0.317021	0	hypothetical protein (231 nt)	339	231	49.35
TCONS_00001453	XLOC_001375	NA	MGG_02201	TSS1411	=	MGG_02201T0	supercont8.1:925297-926587	1290	0	0.0279035	0	0	0	0	0.0837106	0	endothiapepsin (1290 nt)	1290	1290	59.46
TCONS_00001455	XLOC_001377	NA	MGG_02203	TSS1413	=	MGG_02203T0	supercont8.1:928831-930620	1678	73.7183	48.2382	70.2248	78.3062	72.6238	45.4402	48.7751	50.4994	hypothetical protein (1350 nt)	1678	1350	64
TCONS_00001456	XLOC_001378	NA	MGG_02205	TSS1414	=	MGG_02205T0	supercont8.1:936482-937782	1224	0.13022	0.123027	0.0838762	0.230491	0.0762933	0.190929	0.178153	0	alcohol dehydrogenase (1224 nt)	1224	1224	58.91
TCONS_00001457	XLOC_001379	NA	MGG_02208	TSS1415	=	MGG_02208T0	supercont8.1:944573-945221	567	3.63249	30.9095	2.418	4.89016	3.58931	27.0577	32.4882	33.1825	hypothetical protein (567 nt)	567	567	59.08
TCONS_00001458	XLOC_001380	NA	MGG_02210	TSS1416	=	MGG_02210T0	supercont8.1:948870-950658	1788	1.56032	0.772941	1.86417	1.14136	1.67542	0.564428	1.06471	0.689687	vanadium chloroperoxidase (1788 nt)	1788	1788	64.32
TCONS_00001459	XLOC_001381	NA	MGG_02212	TSS1417	=	MGG_02212T0	supercont8.1:956663-957161	498	0	0.0502755	0	0	0	0	0	0.150826	hypothetical protein (498 nt)	498	498	66.06
TCONS_00001460	XLOC_001382	NA	MGG_16064	TSS1418	=	MGG_16064T0	supercont8.1:972056-972842	675	5.05291	6.39294	6.45444	4.7778	3.92648	8.02387	5.15214	6.00281	hypothetical protein (675 nt)	675	675	52.59
TCONS_00001461	XLOC_001383	NA	MGG_02217	TSS1419	=	MGG_02217T0	supercont8.1:974027-975434	1407	0.214842	0	0.124987	0.195682	0.323856	0	0	0	glycosyltransferase (1407 nt)	1407	1407	56.86
TCONS_00001465	XLOC_001387	NA	MGG_02222	TSS1423	=	MGG_02222T0	supercont8.1:1005389-1006382	813	0.175365	0.0987369	0.399042	0	0.127054	0	0.0741272	0.222084	hypothetical protein (813 nt)	813	813	62.61
TCONS_00001467	XLOC_001389	NA	MGG_02224	TSS1425	=	MGG_02224T0	supercont8.1:1025619-1027217	1470	9.08435	13.6824	11.0029	8.18449	8.06567	14.5339	13.8045	12.7089	hypothetical protein (822 nt)	1470	822	54.01
TCONS_00001468	XLOC_001390	NA	MGG_02226	TSS1426	=	MGG_02226T0	supercont8.1:1028519-1033197	4050	1.10352	1.66539	1.18559	1.06622	1.05876	1.91777	1.51053	1.56786	hypothetical protein (2550 nt)	4050	2550	63.06
TCONS_00001471	XLOC_001393	NA	MGG_02234	TSS1429	=	MGG_02234T0	supercont8.1:1088679-1089434	537	4.10893	15.5491	5.6438	3.23792	3.44507	17.2259	12.5806	16.841	hypothetical protein (537 nt)	537	537	64.99
TCONS_00001474	XLOC_001396	NA	MGG_02239	TSS1432	=	MGG_02239T0	supercont8.1:1102526-1103157	516	1.00058	3.46509	0.795913	0.492846	1.71297	2.13052	4.84751	3.41725	hypothetical protein (516 nt)	516	516	58.72
TCONS_00001475	XLOC_001397	NA	MGG_02241	TSS1433	=	MGG_02241T0	supercont8.1:1106968-1111959	949	64.9739	42.9027	47.7952	73.4031	73.7234	32.2745	47.0347	49.3989	FMP21 (447 nt)	949	447	68.01
TCONS_00001476	XLOC_001398	NA	MGG_02243	TSS1434	=	MGG_02243T0	supercont8.1:1115381-1120605	2695	3.61778	2.43777	3.22684	4.04721	3.5793	2.18199	2.53075	2.60057	amidohydrolase (1515 nt)	2695	1515	65.94
TCONS_00001478	XLOC_001400	NA	MGG_02245	TSS1436	=	MGG_02245T0	supercont8.1:1123592-1125208	1248	0.0985003	0.053456	0.0713142	0.0750789	0.149108	0.116903	0	0.043465	endoglucanase type F (1143 nt)	1248	1143	62.73
TCONS_00001479	XLOC_001401	NA	MGG_02246	TSS1437	=	MGG_02246T0	supercont8.1:1126300-1127102	660	0	0.506216	0	0	0	0.140667	0.787867	0.590113	hypothetical protein (258 nt)	660	258	58.91
TCONS_00001480	XLOC_001402	NA	MGG_02247	TSS1438	=	MGG_02247T0	supercont8.1:1128393-1129982	1475	2.72789	12.9985	2.64415	2.84103	2.6985	13.6598	12.7838	12.552	SAM-dependent methyltransferase (975 nt)	1475	975	65.74
TCONS_00001481	XLOC_001403	NA	MGG_16077	TSS1439	=	MGG_16077T0	supercont8.1:1151430-1152448	900	27.3529	10.8185	22.6074	29.0475	30.4038	8.03532	12.9326	11.4874	hypothetical protein (900 nt)	900	900	53.56
TCONS_00001482	XLOC_001404	NA	MGG_02252	TSS1440	=	MGG_02252T0	supercont8.1:1153434-1155293	1299	21.5407	138.426	26.8047	18.5469	19.2705	173.91	121.18	120.187	tetrahydroxynaphthalene reductase (852 nt)	1299	852	58.33
TCONS_00001483	XLOC_001405	NA	MGG_02254	TSS1441	=	MGG_02254T0	supercont8.1:1156145-1160798	1367	102.681	101.247	105.786	101.046	101.21	106.542	98.1194	99.0803	hypothetical protein (765 nt)	1367	765	64.71
TCONS_00001485	XLOC_001407	NA	MGG_02259	TSS1443	=	MGG_02259T0	supercont8.1:1173647-1177452	3691	36.1335	82.8395	33.4469	36.6735	38.2801	76.8776	87.8578	83.783	hypothetical protein (1599 nt)	3691	1599	63.41
TCONS_00001486	XLOC_001408	NA	MGG_16078	TSS1444	=	MGG_16078T0	supercont8.1:1177511-1178252	741	0	0.123509	0	0	0	0.202857	0.0838906	0.0837784	hypothetical protein (234 nt)	741	234	58.12
TCONS_00001487	XLOC_001409	NA	MGG_02261	TSS1445	=	MGG_02261T0	supercont8.1:1181306-1183289	1959	2.53471	5.41532	2.69318	2.28547	2.62547	5.41693	5.11953	5.70949	feruloyl esterase B (1959 nt)	1959	1959	65.44
TCONS_00001489	XLOC_001411	NA	MGG_02269	TSS1447	=	MGG_02269T0	supercont8.1:1212486-1214111	1625	1.29155	4.23481	0.953604	1.65845	1.26259	3.89583	4.10298	4.70563	hypothetical protein (1134 nt)	1625	1134	55.73
TCONS_00001492	XLOC_001414	NA	MGG_02272	TSS1450	=	MGG_02272T0	supercont8.1:1223227-1224871	1581	2.36766	51.5792	2.27437	2.05334	2.77527	46.1026	55.858	52.777	ent-kaurene oxidase (1581 nt)	1581	1581	61.8
TCONS_00001493	XLOC_001415	NA	MGG_02273	TSS1451	=	MGG_02273T0	supercont8.1:1225924-1226720	651	835.29	4625.32	837.749	840.952	827.169	4354.77	4739.53	4781.66	hypothetical protein (561 nt)	651	561	65.95
TCONS_00001494	XLOC_001416	NA	MGG_02275	TSS1452	=	MGG_02275T0	supercont8.1:1230292-1232144	1590	6.19711	23.4134	6.89849	6.34694	5.3459	22.3642	24.6109	23.2651	endoprotease (1590 nt)	1590	1590	64.65
TCONS_00001495	XLOC_001417	NA	MGG_16085	TSS1453	=	MGG_16085T0	supercont8.1:1254527-1255104	228	6.37168	0.891431	14.6787	2.22561	2.21074	2.67429	0	0	hypothetical protein (228 nt)	228	228	49.56
TCONS_00001498	XLOC_001418	NA	MGG_14592	TSS1455	=	MGG_14592T0	supercont8.1:1258712-1260648	441	33.317	11.3823	18.871	40.9624	40.1175	6.06064	15.1894	12.897	hypothetical protein (441 nt)	441	441	57.6
TCONS_00001499	XLOC_001419	NA	MGG_02289	TSS1456	=	MGG_02289T0	supercont8.1:1273077-1275873	1805	4.59589	3.20039	5.07909	4.27172	4.43686	2.88644	3.24583	3.46891	hypothetical protein (1428 nt)	1805	1428	60.29
TCONS_00001500	XLOC_001420	NA	MGG_02294	TSS1457	=	MGG_02294T0	supercont8.1:1286631-1288591	1620	0	0.0321524	0	0	0	0	0.0643338	0.0321234	ent-kaurene oxidase (1620 nt)	1620	1620	57.1
TCONS_00001502	XLOC_001422	NA	MGG_02297	TSS1459	=	MGG_02297T0	supercont8.1:1295284-1297464	2106	75.7792	82.0154	63.5697	81.8623	81.9054	69.0793	88.088	88.8789	hypothetical protein (1791 nt)	2106	1791	62.37
TCONS_00001504	XLOC_001424	NA	MGG_02303	TSS1461	=	MGG_02303T0	supercont8.1:1307894-1310270	1037	24.5247	28.938	25.2023	23.6625	24.7093	28.078	29.1702	29.5658	phosphoribulokinase/uridine kinase (711 nt)	1037	711	62.03
TCONS_00001505	XLOC_001425	NA	MGG_02304	TSS1462	=	MGG_02304T0	supercont8.1:1310644-1311795	1065	0.493421	0.741975	0.303321	0.545256	0.631686	0.752036	0.790078	0.683812	leucoanthocyanidin reductase (1065 nt)	1065	1065	57.56
TCONS_00001508	XLOC_001428	NA	MGG_02309	TSS1465	=	MGG_02309T0	supercont8.1:1322718-1326286	2096	23.9619	140.797	22.5275	25.6152	23.7429	124.987	148.236	149.167	carboxypeptidase S1 (1905 nt)	2096	1905	60.89
TCONS_00001509	XLOC_001429	NA	MGG_16091	TSS1466	=	MGG_16091T0	supercont8.1:1327657-1328308	276	0.314067	0	0.9422	0	0	0	0	0	hypothetical protein (276 nt)	276	276	58.33
TCONS_00001510	XLOC_001430	NA	MGG_11962	TSS1467	=	MGG_11962T0	supercont8.1:1336117-1338286	1854	0.233261	0.895836	0.225619	0.142949	0.331215	0.699494	0.911843	1.07617	G-protein coupled receptor (1854 nt)	1854	1854	59.71
TCONS_00001514	XLOC_001432	NA	MGG_16096	TSS1470	=	MGG_16096T0	supercont8.1:1358514-1362054	1982	40.7329	66.0789	42.457	40.7295	39.0122	71.7281	62.6337	63.8749	hypothetical protein (1476 nt)	1982	1476	60.16
TCONS_00001515	XLOC_001433	NA	MGG_16097	TSS1471	=	MGG_16097T0	supercont8.1:1368027-1369740	1713	0.177925	0.215971	0.222772	0.104153	0.206849	0.225562	0.120788	0.301562	hypothetical protein (1713 nt)	1713	1713	58.9
TCONS_00001518	XLOC_001436	NA	MGG_11952	TSS1474	=	MGG_11952T0	supercont8.1:1419152-1419512	360	1.77852	0.382056	1.02429	3.35835	0.952911	0.592844	0.276839	0.276484	hypothetical protein (360 nt)	360	360	57.78
TCONS_00001519	XLOC_001437	NA	MGG_02327	TSS1475	=	MGG_02327T0	supercont8.1:1419828-1420788	960	0.703395	0.85205	0.564939	0.826826	0.718419	0.760742	0.718743	1.07666	hypothetical protein (720 nt)	960	720	57.92
TCONS_00001520	XLOC_001438	NA	MGG_02330	TSS1476	=	MGG_02330T0	supercont8.1:1428136-1430430	1839	1.63374	36.4355	1.11532	1.97147	1.81443	33.5405	39.2322	36.5337	hypothetical protein (1839 nt)	1839	1839	64.33
TCONS_00001522	XLOC_001440	NA	MGG_02335	TSS1478	=	MGG_02335T0	supercont8.1:1444575-1445577	891	0	0.315635	0	0	0	0.223156	0.460793	0.262957	hypothetical protein (891 nt)	891	891	57.69
TCONS_00001523	XLOC_001441	NA	MGG_02336	TSS1479	=	MGG_02336T0	supercont8.1:1446439-1447651	981	0	0.019406	0	0	0	0	0	0.0582179	isoflavone reductase (981 nt)	981	981	54.43
TCONS_00001524	XLOC_001442	NA	MGG_02339	TSS1480	=	MGG_02339T0	supercont8.1:1453821-1454437	465	0	0.112886	0	0	0	0	0.16944	0.169218	hypothetical protein (465 nt)	465	465	61.08
TCONS_00001528	XLOC_001446	NA	MGG_02345	TSS1484	=	MGG_02345T0	supercont8.1:1479066-1479762	534	0	0.841533	0	0	0	1.04047	0.675089	0.809037	hypothetical protein (534 nt)	534	534	54.68
TCONS_00001529	XLOC_001447	NA	MGG_02349	TSS1485	=	MGG_02349T0	supercont8.1:1491589-1496700	988	0.165475	0.514386	0	0.199406	0.297019	0.792614	0.288911	0.461635	pyrroline-5-carboxylate reductase (900 nt)	988	900	70.67
TCONS_00001531	XLOC_001449	NA	MGG_16102	TSS1487	=	MGG_16102T0	supercont8.1:1517370-1517837	399	0.871859	0.841807	0.678611	1.55172	0.385246	0.957701	0.896337	0.671383	hypothetical protein (252 nt)	399	252	56.35
TCONS_00001535	XLOC_001453	NA	MGG_02354	TSS1491	=	MGG_02354T0	supercont8.1:1534640-1536145	840	0	0.0494826	0	0	0	0.0775156	0	0.0709321	hypothetical protein (639 nt)	840	639	59.31
TCONS_00001536	XLOC_001454	NA	MGG_14571	TSS1492	=	MGG_14571T0	supercont8.1:1542565-1545047	1867	1.16366	0.993218	1.37102	1.04014	1.07981	1.39059	0.767671	0.821391	hypothetical protein (1434 nt)	1867	1434	67.36
TCONS_00001537	XLOC_001455	NA	MGG_14572	TSS1493	=	MGG_14572T0	supercont8.1:1545968-1547000	819	0.35643	0.201521	0.312529	0.253433	0.503329	0.0910503	0.220246	0.293267	hypothetical protein (819 nt)	819	819	61.42
TCONS_00001538	XLOC_001456	NA	MGG_14573	TSS1494	=	MGG_14573T0	supercont8.1:1547326-1549847	2521	8.71949	7.23522	10.6486	7.71445	7.79542	8.68592	6.62263	6.39713	hypothetical protein (2028 nt)	2521	2028	56.9
TCONS_00001539	XLOC_001457	NA	MGG_14574	TSS1495	=	MGG_14574T0	supercont8.1:1550105-1552965	2485	47.6343	121.035	50.2037	46.0824	46.6167	124.97	119.74	118.397	hypothetical protein (1905 nt)	2485	1905	63.83
TCONS_00001540	XLOC_001458	NA	MGG_02366	TSS1496	=	MGG_02366T0	supercont8.1:1557054-1561905	4777	15.7885	17.5292	15.5289	15.957	15.8795	18.0969	17.2421	17.2487	hypothetical protein (3018 nt)	4777	3018	58.28
TCONS_00001541	XLOC_001459	NA	MGG_16106	TSS1497	=	MGG_16106T0	supercont8.1:1566900-1567789	571	2.56625	6.12224	2.04266	2.31388	3.34221	7.05099	5.72246	5.59328	hypothetical protein (408 nt)	571	408	46.57
TCONS_00001543	XLOC_001461	NA	MGG_02370	TSS1499	=	MGG_02370T0	supercont8.1:1574517-1576373	1620	342.695	159.82	393.775	319.152	315.157	185.845	147.775	145.84	mitochondrial phosphate carrier protein (930 nt)	1620	930	61.29
TCONS_00001544	XLOC_001462	NA	MGG_02371	TSS1500	=	MGG_02371T0	supercont8.1:1576937-1579134	2010	0.641629	1.03423	0.579905	0.609752	0.735231	0.856234	1.16184	1.0846	alcohol dehydrogenase (2010 nt)	2010	2010	63.43
TCONS_00001545	XLOC_001463	NA	MGG_02374	TSS1501	=	MGG_02374T0	supercont8.1:1583768-1586067	2223	16.6141	6.53601	18.7736	14.8509	16.2178	7.4543	6.21653	5.9372	hypothetical protein (2223 nt)	2223	2223	56.1
TCONS_00001546	XLOC_001464	NA	MGG_16107	TSS1502	=	MGG_16107T0	supercont8.1:1586406-1587247	638	0.959167	0.812008	0.742722	1.07112	1.06366	1.29926	0.930304	0.206459	hypothetical protein (477 nt)	638	477	60.8
TCONS_00001547	XLOC_001465	NA	MGG_11934	TSS1503	=	MGG_11934T0	supercont8.1:1588146-1589945	1723	23.2621	15.9402	23.5961	22.7637	23.4264	17.0622	15.2098	15.5487	acetylornithine aminotransferase (1395 nt)	1723	1395	60.22
TCONS_00001548	XLOC_001466	NA	MGG_16109	TSS1504	=	MGG_16109T0	supercont8.1:1600382-1601133	267	0	0.419013	0	0	0	0.629821	0	0.627219	hypothetical protein (267 nt)	267	267	60.67
TCONS_00001551	XLOC_001469	NA	MGG_02378	TSS1507	=	MGG_02378T0	supercont8.1:1609862-1615708	2721	213.257	157.297	222.569	208.82	208.384	163.587	154.239	154.066	glutamate decarboxylase (1554 nt)	2721	1554	57.4
TCONS_00001552	XLOC_001470	NA	MGG_02379	TSS1508	=	MGG_02379T0	supercont8.1:1616610-1617336	726	2.39107	7.26198	1.39024	2.23381	3.54917	5.23489	8.79826	7.7528	hypothetical protein (726 nt)	726	726	65.29
TCONS_00001553	XLOC_001471	NA	MGG_16113	TSS1509	=	MGG_16113T0	supercont8.1:1617854-1618220	366	0	0.624701	0	0	0	0.272839	0.267163	1.3341	hypothetical protein (366 nt)	366	366	47.81
TCONS_00001555	XLOC_001473	NA	MGG_11927	TSS1511	=	MGG_11927T0	supercont8.1:1624540-1625854	894	19.6634	26.0618	22.3453	19.9083	16.7365	29.3189	26.4148	22.4519	3-oxoacyl-[acyl-carrier-protein] reductase (894 nt)	894	894	67.23
TCONS_00001556	XLOC_001474	NA	MGG_02383	TSS1512	=	MGG_02383T0	supercont8.1:1628221-1629522	1210	2.04831	6.45609	2.10771	2.18093	1.8563	6.50795	6.90828	5.95204	hypothetical protein (864 nt)	1210	864	57.06
TCONS_00001557	XLOC_001475	NA	MGG_02387	TSS1513	=	MGG_02387T0	supercont8.1:1639739-1643150	3216	3.09142	2.64502	3.35616	2.87819	3.03991	2.94506	2.68628	2.30373	hypothetical protein (2532 nt)	3216	2532	54.98
TCONS_00001558	XLOC_001476	NA	MGG_16114	TSS1514	=	MGG_16114T0	supercont8.1:1648281-1650375	1332	0.0211002	0.0134185	0.0633005	0	0	0	0	0.0402556	hypothetical protein (1332 nt)	1332	1332	59.01
TCONS_00001559	XLOC_001477	NA	MGG_11925	TSS1515	=	MGG_11925T0	supercont8.1:1656972-1661070	3773	11.585	5.22084	10.8048	11.797	12.1531	4.6368	5.43337	5.59234	hypothetical protein (1035 nt)	3773	1035	54.59
TCONS_00001560	XLOC_001478	NA	MGG_02390	TSS1516	=	MGG_02390T0	supercont8.1:1664693-1667648	2784	43.9161	43.7979	45.2222	43.1108	43.4153	44.2215	43.3149	43.8574	hypothetical protein (1602 nt)	2784	1602	54.56
TCONS_00001561	XLOC_001479	NA	MGG_11919	TSS1517	=	MGG_11919T0	supercont8.1:1670158-1673032	2794	13.5104	29.6203	15.8604	12.409	12.2617	33.1902	27.9247	27.7458	hypothetical protein (1983 nt)	2794	1983	55.17
TCONS_00001562	XLOC_001480	NA	MGG_02395	TSS1518	=	MGG_02395T0	supercont8.1:1682669-1689641	6972	3.94124	4.57634	3.93338	3.7789	4.11145	4.53329	4.59423	4.60149	leucine-rich repeat-containing protein 23 (6021 nt)	6972	6021	54.09
TCONS_00001563	XLOC_001481	NA	MGG_02398	TSS1519	=	MGG_02398T0	supercont8.1:1703268-1707760	4213	90.2767	120.102	89.1295	93.2868	88.4139	118.67	122.411	119.225	DENN domain-containing protein (2718 nt)	4213	2718	58.31
TCONS_00001564	XLOC_001482	NA	MGG_11915	TSS1520	=	MGG_11915T0	supercont8.1:1721714-1721981	267	0.35838	1.04382	1.07514	0	0	0.620352	1.88389	0.627219	hypothetical protein (267 nt)	267	267	55.81
TCONS_00001565	XLOC_001483	NA	MGG_02401	TSS1521	=	MGG_02401T0	supercont8.1:1722829-1724779	1950	5.50205	4.57003	5.59665	5.81054	5.09896	4.65144	5.19802	3.86062	hypothetical protein (1950 nt)	1950	1950	56.97
TCONS_00001566	XLOC_001484	NA	MGG_02403	TSS1522	=	MGG_02403T1	supercont8.1:1727410-1729998	2167	2.72263	18.2416	2.55354	3.48741	2.12695	16.6697	19.2807	18.7743	hypothetical protein, variant (1647 nt)	2167	1647	54.71
TCONS_00001567	XLOC_001484	NA	MGG_02403	TSS1523	=	MGG_02403T0	supercont8.1:1727410-1729998	2172	0.2325	0.650993	0	5.21e-05	0.697449	0.471667	0.547836	0.933475	hypothetical protein (1647 nt)	2172	1647	54.71
TCONS_00001568	XLOC_001485	NA	MGG_02404	TSS1524	=	MGG_02404T0	supercont8.1:1731508-1732962	1288	2.35207	2.14785	2.37141	2.31458	2.37022	1.9591	2.80943	1.67501	hypothetical protein (1281 nt)	1288	1281	59.25
TCONS_00001569	XLOC_001486	NA	MGG_02405	TSS1525	=	MGG_02405T0	supercont8.1:1734753-1738462	3317	48.1888	55.3989	50.3417	45.8777	48.3471	56.4212	54.881	54.8944	hypothetical protein (1629 nt)	3317	1629	59.12
TCONS_00001571	XLOC_001488	NA	MGG_02412	TSS1527	=	MGG_02412T0	supercont8.1:1755474-1762050	1273	29.5189	32.5058	29.5037	30.1416	28.9113	35.5302	30.7808	31.2063	hypothetical protein (624 nt)	1273	624	66.19
TCONS_00001572	XLOC_001489	NA	MGG_11914	TSS1528	=	MGG_11914T0	supercont8.1:1755474-1762050	2195	78.8562	44.1271	66.8879	85.8867	83.7941	39.6108	46.0731	46.6973	hypothetical protein (654 nt)	2195	654	56.88
TCONS_00001573	XLOC_001490	NA	MGG_02416	TSS1529	=	MGG_02416T0	supercont8.1:1766901-1769928	3027	7.93537	9.66439	8.87028	7.45243	7.48339	11.0513	9.03366	8.90822	phosphatidate cytidylyltransferase (1455 nt)	3027	1455	57.66
TCONS_00001574	XLOC_001491	NA	MGG_02420	TSS1530	=	MGG_02420T0	supercont8.1:1788647-1790810	1524	0.683468	2.3602	0.805821	0.594839	0.649745	2.3243	2.37977	2.37655	hypothetical protein (1524 nt)	1524	1524	61.29
TCONS_00001575	XLOC_001492	NA	MGG_02421	TSS1531	=	MGG_02421T0	supercont8.1:1792505-1795073	1773	0.889224	1.00785	0.820775	0.90173	0.945166	0.759193	1.16197	1.10238	hypothetical protein (1644 nt)	1773	1644	58.64
TCONS_00001578	XLOC_001493	NA	MGG_16126	TSS1533	=	MGG_16126T0	supercont8.1:1797086-1800333	1316	82.8349	120.851	90.8678	79.8565	77.7804	135.498	111.738	115.317	hypothetical protein (645 nt)	1316	645	50.85
TCONS_00001579	XLOC_001494	NA	MGG_11913	TSS1534	=	MGG_11913T0	supercont8.1:1801089-1806815	2779	6.80881	3.475	5.85843	6.85235	7.71566	2.97876	3.24692	4.19932	hypothetical protein (936 nt)	2779	936	54.59
TCONS_00001580	XLOC_001495	NA	MGG_02425	TSS1535	=	MGG_02425T0	supercont8.1:1809549-1816412	6431	23.4907	21.6295	24.3369	22.4603	23.6749	21.9603	21.8976	21.0306	hypothetical protein (5307 nt)	6431	5307	55.46
TCONS_00001581	XLOC_001496	NA	MGG_02429	TSS1536	=	MGG_02429T0	supercont8.1:1832201-1832902	399	17.5704	12.6835	19.8553	15.9051	16.9508	16.1049	10.756	11.1897	RING-2 protein (399 nt)	399	399	65.16
TCONS_00001582	XLOC_001497	NA	MGG_02431	TSS1537	=	MGG_02431T0	supercont8.1:1835090-1835599	408	0	0.0714555	0	0	0	0	0	0.214366	hypothetical protein (408 nt)	408	408	65.93
TCONS_00001583	XLOC_001498	NA	MGG_02432	TSS1538	=	MGG_02432T0	supercont8.1:1837114-1840916	3667	60.1974	61.2229	68.2037	56.2556	56.1329	68.0917	57.841	57.736	leucyl-tRNA synthetase (3378 nt)	3667	3378	54.94
TCONS_00001584	XLOC_001499	NA	MGG_02434	TSS1539	=	MGG_02434T0	supercont8.1:1841515-1843393	1258	61.0077	65.3604	72.1254	59.2748	51.6228	78.974	59.4118	57.6955	AP-3 complex subunit sigma (564 nt)	1258	564	57.45
TCONS_00001585	XLOC_001500	NA	MGG_02438	TSS1540	=	MGG_02438T0	supercont8.1:1846134-1851010	2607	12.312	23.4178	11.8573	12.2241	12.8545	23.4498	23.9496	22.8541	hypothetical protein (1251 nt)	2607	1251	60.19
TCONS_00001586	XLOC_001501	NA	MGG_02439	TSS1541	=	MGG_02439T0	supercont8.1:1852320-1853601	1041	2.73963	16.7747	2.53775	2.8971	2.78405	16.4393	17.2786	16.6063	oxidoreductase (1041 nt)	1041	1041	64.65
TCONS_00001587	XLOC_001502	NA	MGG_11908	TSS1542	=	MGG_11908T0	supercont8.1:1854416-1856106	1497	18.8473	16.6519	18.663	19.3689	18.5099	15.7958	16.8276	17.3322	hypothetical protein (1497 nt)	1497	1497	56.85
TCONS_00001588	XLOC_001503	NA	MGG_11907	TSS1543	=	MGG_11907T0	supercont8.1:1857431-1863769	2215	25.0456	24.2238	24.2846	25.6713	25.1807	24.0905	24.9873	23.5935	hypothetical protein (1383 nt)	2215	1383	54.74
TCONS_00001589	XLOC_001504	NA	MGG_02442	TSS1544	=	MGG_02442T0	supercont8.1:1865582-1873250	4306	24.771	28.5678	26.9906	23.3036	24.0186	30.2865	27.7161	27.7007	zinc metalloprotease (3162 nt)	4306	3162	53.76
TCONS_00001590	XLOC_001505	NA	MGG_02447	TSS1545	=	MGG_02447T0	supercont8.1:1905852-1911920	5670	4.12141	4.05792	4.29328	4.07124	3.9997	4.23988	3.78552	4.14837	hypothetical protein (5670 nt)	5670	5670	53.17
TCONS_00001591	XLOC_001506	NA	MGG_02448	TSS1546	=	MGG_02448T0	supercont8.1:1912549-1913852	1239	42.5683	34.1886	38.8171	43.7698	45.1181	30.4448	36.3042	35.8168	hypothetical protein (984 nt)	1239	984	55.79
TCONS_00001592	XLOC_001507	NA	MGG_02454	TSS1547	=	MGG_02454T0	supercont8.1:1926771-1928682	1911	33.7653	25.8921	31.5223	34.5962	35.1775	23.243	27.3018	27.1314	SamB protein (1911 nt)	1911	1911	55.15
TCONS_00001593	XLOC_001508	NA	MGG_16127	TSS1548	=	MGG_16127T0	supercont8.1:1929462-1930771	405	0.499632	0.220656	0.747839	0.376833	0.374225	0.661967	0	0	hypothetical protein (405 nt)	405	405	55.06
TCONS_00001594	XLOC_001509	NA	MGG_11904	TSS1549	=	MGG_11904T0	supercont8.1:1930993-1935611	4618	5.34807	5.64902	5.44814	5.32556	5.27051	6.06941	5.44253	5.43513	hypothetical protein (1191 nt)	4618	1191	59.19
TCONS_00001595	XLOC_001510	NA	MGG_11902	TSS1550	=	MGG_11902T0	supercont8.1:1935796-1941497	3407	69.5892	28.7996	75.0923	67.0112	66.6641	30.7806	27.8066	27.8116	mitochondrial dynamin GTPase (2901 nt)	3407	2901	54.95
TCONS_00001596	XLOC_001511	NA	MGG_02456	TSS1551	=	MGG_02456T1	supercont8.1:1942020-1946955	4424	29.952	15.671	26.8833	31.9782	30.9944	13.8719	16.8117	16.3293	hypothetical protein, variant (3684 nt)	4424	3684	56.73
TCONS_00001597	XLOC_001511	NA	MGG_02456	TSS1552	=	MGG_02456T0	supercont8.1:1942020-1946955	3936	5.91565	3.30531	5.63613	6.25632	5.85451	2.82115	3.36335	3.73144	hypothetical protein (3936 nt)	3936	3936	56.58
TCONS_00001598	XLOC_001512	NA	MGG_02458	TSS1553	=	MGG_02458T0	supercont8.1:1952372-1953457	1085	70.929	47.8746	63.186	74.7087	74.8923	44.0039	52.9308	46.6891	hypothetical protein (627 nt)	1085	627	64.11
TCONS_00001599	XLOC_001513	NA	MGG_02459	TSS1554	=	MGG_02459T0	supercont8.1:1953625-1955808	1923	24.8865	31.6618	23.8811	24.7491	26.0295	33.2694	30.2692	31.4469	DNA polymerase delta small subunit (1494 nt)	1923	1494	53.55
TCONS_00001600	XLOC_001514	NA	MGG_02461	TSS1555	=	MGG_02461T0	supercont8.1:1958182-1960733	2494	76.8917	15.3769	79.7153	75.2311	75.7287	15.2428	15.016	15.8719	hypothetical protein (1917 nt)	2494	1917	52.32
TCONS_00001601	XLOC_001515	NA	MGG_02463	TSS1556	=	MGG_02463T0	supercont8.1:1960829-1963124	815	88.6915	86.6729	87.6338	90.5495	87.8912	86.2782	85.341	88.3996	hypothetical protein (393 nt)	815	393	57.25
TCONS_00001602	XLOC_001516	NA	MGG_02464	TSS1557	=	MGG_02464T0	supercont8.1:1963244-1966646	3323	61.395	45.2402	69.4424	56.0747	58.6681	50.9249	42.4487	42.3471	vacuolar amino acid transporter 3 (2307 nt)	3323	2307	55.14
TCONS_00001603	XLOC_001517	NA	MGG_02466	TSS1558	=	MGG_02466T0	supercont8.1:1970925-1972494	1095	903.427	622.349	1164.69	776.206	769.386	807.71	531.68	527.658	V-type proton ATPase proteolipid subunit (489 nt)	1095	489	55.21
TCONS_00001604	XLOC_001518	NA	MGG_02469	TSS1559	=	MGG_02469T0	supercont8.1:1974192-1978908	1161	18.7652	21.648	17.7994	19.5603	18.936	22.3708	21.3484	21.2249	hypothetical protein (1161 nt)	1161	1161	54.26
TCONS_00001605	XLOC_001519	NA	MGG_02472	TSS1560	=	MGG_02472T0	supercont8.1:1983389-1984202	813	3.79481	7.64496	3.47581	4.47816	3.43047	7.60029	8.07986	7.25473	hypothetical protein (813 nt)	813	813	62.24
TCONS_00001606	XLOC_001520	NA	MGG_02474	TSS1561	=	MGG_02474T0	supercont8.1:1988059-1992129	3909	64.3553	20.2853	67.785	63.3802	61.9007	21.6375	19.086	20.1326	hypothetical protein (1167 nt)	3909	1167	54.41
TCONS_00001607	XLOC_001521	NA	MGG_02476	TSS1562	=	MGG_02476T0	supercont8.1:1996705-2004791	7808	31.3276	17.3586	33.5713	30.3998	30.0115	18.9285	16.4916	16.6556	hypothetical protein (6570 nt)	7808	6570	53.91
TCONS_00001608	XLOC_001522	NA	MGG_02482	TSS1563	=	MGG_02482T0	supercont8.1:2023273-2031105	3347	5.60551	9.16974	4.94144	6.64562	5.22946	8.51072	9.25132	9.74717	DNA replication licensing factor mcm10 (2517 nt)	3347	2517	57.37
TCONS_00001609	XLOC_001523	NA	MGG_02484	TSS1564	=	MGG_02484T0	supercont8.1:2031282-2034150	1747	21.2021	31.8766	21.1248	20.9854	21.4961	32.0227	32.194	31.413	hypothetical protein (678 nt)	1747	678	57.37
TCONS_00001610	XLOC_001524	NA	MGG_11895	TSS1565	=	MGG_11895T0	supercont8.1:2057037-2061116	3858	15.1521	14.5451	17.2398	14.717	13.4996	16.2915	13.456	13.8877	SCY1 protein kinase (2994 nt)	3858	2994	54.31
TCONS_00001611	XLOC_001525	NA	MGG_02490	TSS1566	=	MGG_02490T0	supercont8.1:2061266-2064494	1277	354.825	269.467	344.469	368.984	351.022	266.766	262.026	279.608	hypothetical protein (336 nt)	1277	336	62.2
TCONS_00001612	XLOC_001526	NA	MGG_02491	TSS1567	=	MGG_02491T0	supercont8.1:2064695-2070608	5616	4.25647	5.39389	4.69077	4.06805	4.01059	5.64972	5.17657	5.35536	DNA replication ATP-dependent helicase dna2 (5070 nt)	5616	5070	53.2
TCONS_00001613	XLOC_001527	NA	MGG_02493	TSS1568	=	MGG_02493T0	supercont8.1:2070787-2076124	3697	16.7474	16.7995	16.9302	16.8382	16.4737	16.7996	16.8764	16.7227	hypothetical protein (3024 nt)	3697	3024	54.27
TCONS_00001615	XLOC_001529	NA	MGG_02496	TSS1570	=	MGG_02496T0	supercont8.1:2080496-2081739	1161	105.785	117.48	114.512	103.285	99.5561	123.882	113.099	115.458	methionine-R-sulfoxide reductase B2 (636 nt)	1161	636	58.49
TCONS_00001616	XLOC_001530	NA	MGG_16134	TSS1571	=	MGG_16134T0	supercont8.1:2092076-2093654	1274	27.5875	5.10921	26.4666	28.6483	27.6477	5.05577	4.92717	5.3447	hypothetical protein (369 nt)	1274	369	55.01
TCONS_00001617	XLOC_001531	NA	MGG_02499	TSS1572	=	MGG_02499T0	supercont8.1:2097412-2100576	3084	79.951	46.8544	71.4218	86.5154	81.9157	41.5236	48.6098	50.4298	hypothetical protein (1764 nt)	3084	1764	55.73
TCONS_00001618	XLOC_001532	NA	MGG_16136	TSS1573	=	MGG_16136T0	supercont8.1:2107667-2107997	183	0	1.65278	0	0	0	0	4.95833	0	hypothetical protein (183 nt)	183	183	55.74
TCONS_00001619	XLOC_001533	NA	MGG_16137	TSS1574	=	MGG_16137T0	supercont8.1:2108269-2109345	366	0	0.0889401	0	0	0	0	0	0.26682	hypothetical protein (366 nt)	366	366	48.63
TCONS_00001621	XLOC_001535	NA	MGG_02501	TSS1576	=	MGG_02501T0	supercont8.1:2120060-2123021	2961	4.05387	3.99623	3.98879	4.05805	4.11476	3.85553	4.12731	4.00584	hypothetical protein (2085 nt)	2961	2085	59.71
TCONS_00001623	XLOC_001537	NA	MGG_02503	TSS1578	=	MGG_02503T0	supercont8.1:2129132-2131785	2414	317.33	442.121	336.616	309.602	305.772	451.534	439.942	434.888	glucose-regulated protein (1995 nt)	2414	1995	57.09
TCONS_00001624	XLOC_001538	NA	MGG_02504	TSS1579	=	MGG_02504T0	supercont8.1:2132666-2135742	2240	39.8973	43.8351	42.3871	38.3068	38.9982	43.4635	43.9835	44.0582	elongation factor Tu GTP binding domain-containing protein (1692 nt)	2240	1692	51.6
TCONS_00001625	XLOC_001539	NA	MGG_02505	TSS1580	=	MGG_02505T0	supercont8.1:2135975-2140550	2251	47.0603	61.623	45.0107	48.7903	47.3797	60.6209	62.1217	62.1265	pre-60S factor REI1 (1722 nt)	2251	1722	56.1
TCONS_00001626	XLOC_001540	NA	MGG_02506	TSS1581	=	MGG_02506T0	supercont8.1:2141984-2149377	1886	17.9484	29.2693	19.3183	18.4655	16.0616	29.9953	29.9553	27.8573	hypothetical protein (1218 nt)	1886	1218	60.84
TCONS_00001627	XLOC_001541	NA	MGG_02508	TSS1582	=	MGG_02508T0	supercont8.1:2152849-2154097	887	1.82897	3.21932	1.7259	2.39946	1.36155	2.44638	3.4428	3.76877	hypothetical protein (807 nt)	887	807	61.09
TCONS_00001628	XLOC_001542	NA	MGG_02509	TSS1583	=	MGG_02509T0	supercont8.1:2156410-2158879	1242	23.4005	12.3688	21.2951	24.0874	24.8188	11.5605	12.6504	12.8956	juvenile hormone epoxide hydrolase 2 (1242 nt)	1242	1242	60.23
TCONS_00001629	XLOC_001543	NA	MGG_02510	TSS1584	=	MGG_02510T0	supercont8.1:2159516-2160690	636	56.0099	53.7394	57.6097	52.5437	57.8762	50.6019	56.4863	54.1298	coiled-coil domain-containing protein 25 (636 nt)	636	636	50.47
TCONS_00001630	XLOC_001544	NA	MGG_02512	TSS1585	=	MGG_02512T0	supercont8.1:2161001-2163435	999	136.6	61.7612	137.112	132.363	140.325	62.6645	59.3859	63.2331	cytochrome oxidase assembly (630 nt)	999	630	57.94
TCONS_00001631	XLOC_001545	NA	MGG_02514	TSS1586	=	MGG_02514T0	supercont8.1:2163599-2170237	4274	14.8908	19.7576	16.0356	14.2818	14.3549	20.4268	20.5258	18.3201	ankyrin repeat protein nuc-2 (3117 nt)	4274	3117	53.58
TCONS_00001632	XLOC_001546	NA	MGG_02515	TSS1587	=	MGG_02515T0	supercont8.1:2170386-2172148	1601	43.5666	37.9211	43.8141	41.4383	45.4475	38.0495	37.459	38.2548	charged multivesicular body protein 6 (609 nt)	1601	609	51.72
TCONS_00001633	XLOC_001547	NA	MGG_02517	TSS1588	=	MGG_02517T0	supercont8.1:2172399-2178540	3555	19.2886	10.4065	19.3023	19.3378	19.2257	10.0975	9.90685	11.2152	hypothetical protein (2538 nt)	3555	2538	53.82
TCONS_00001634	XLOC_001548	NA	MGG_02521	TSS1589	=	MGG_02521T0	supercont8.1:2192166-2194057	1806	23.4414	40.2679	21.8653	24.4368	24.0221	34.275	43.4216	43.1071	carboxylesterase 3 (1806 nt)	1806	1806	64.51
TCONS_00001635	XLOC_001549	NA	MGG_16141	TSS1590	=	MGG_16141T0	supercont8.1:2194146-2195104	958	7.43824	15.7738	7.44565	7.35732	7.51173	15.8764	14.8329	16.6121	hypothetical protein (360 nt)	958	360	54.72
TCONS_00001636	XLOC_001550	NA	MGG_11885	TSS1591	=	MGG_11885T0	supercont8.1:2196229-2198433	2127	4.49753	10.0704	4.52577	4.05067	4.91616	10.1274	9.6812	10.4027	hypothetical protein (2127 nt)	2127	2127	56.14
TCONS_00001637	XLOC_001551	NA	MGG_02522	TSS1592	=	MGG_02522T0	supercont8.1:2199868-2200389	438	4.66744	17.8028	6.85708	4.55846	2.58677	16.1641	19.9509	17.2933	hypothetical protein (438 nt)	438	438	55.48
TCONS_00001638	XLOC_001552	NA	MGG_02524	TSS1593	=	MGG_02524T0	supercont8.1:2203092-2204391	1084	46.0456	60.4218	44.9202	44.7334	48.4831	58.5119	61.2894	61.4642	vacuolar protein sorting-associated protein 29 (609 nt)	1084	609	59.28
TCONS_00001639	XLOC_001553	NA	MGG_06637	TSS1594	=	MGG_06637T0	supercont8.1:2215371-2217345	1974	26.7429	11.2206	29.6986	26.3501	24.1801	13.1131	9.84354	10.7051	acetyltransferase (555 nt)	1974	555	65.05
TCONS_00001640	XLOC_001554	NA	MGG_06638	TSS1595	=	MGG_06638T0	supercont8.1:2220534-2223345	2743	555.663	138.476	547.464	555.561	563.963	139.293	137.775	138.361	hypothetical protein (462 nt)	2743	462	57.79
TCONS_00001641	XLOC_001555	NA	MGG_06640	TSS1596	=	MGG_06640T0	supercont8.1:2235078-2239780	3999	7.85417	3.84084	10.2679	6.81559	6.47898	4.33148	3.66422	3.52683	hypothetical protein (666 nt)	3999	666	60.96
TCONS_00001642	XLOC_001556	NA	MGG_06643	TSS1597	=	MGG_06643T0	supercont8.1:2243250-2246705	3113	785.924	312.252	786.52	788.67	782.582	313.257	313.398	310.101	hypothetical protein (2340 nt)	3113	2340	53.93
TCONS_00001643	XLOC_001557	NA	MGG_16144	TSS1598	=	MGG_16144T0	supercont8.1:2251759-2253257	1498	3.98961	2.52384	3.38451	4.1863	4.39801	2.64981	2.63829	2.28343	hypothetical protein (183 nt)	1498	183	49.18
TCONS_00001644	XLOC_001558	NA	MGG_16145	TSS1599	=	MGG_16145T0	supercont8.1:2262408-2263673	1233	27.6804	27.9553	26.6505	28.1046	28.2862	24.4775	29.3613	30.0271	hypothetical protein (1233 nt)	1233	1233	57.5
TCONS_00001645	XLOC_001559	NA	MGG_16146	TSS1600	=	MGG_16146T0	supercont8.1:2263754-2264111	357	32.66	32.976	25.8869	39.093	32.9999	29.6169	32.4236	36.8875	predicted protein (357 nt)	357	357	52.94
TCONS_00001646	XLOC_001560	NA	MGG_16147	TSS1601	=	MGG_16147T0	supercont8.1:2266030-2267833	1140	8.22672	8.52099	6.7543	9.20278	8.72307	6.80731	10.0868	8.6688	hypothetical protein (1140 nt)	1140	1140	59.04
TCONS_00001647	XLOC_001561	NA	MGG_06647	TSS1602	=	MGG_06647T0	supercont8.1:2273402-2274884	1236	0.204261	0.295588	0.233592	0.303778	0.0754136	0.314556	0.484276	0.0879314	hypothetical protein (1236 nt)	1236	1236	53.48
TCONS_00001648	XLOC_001562	NA	MGG_06648	TSS1603	=	MGG_06648T0	supercont8.1:2276301-2279942	3641	60.8754	65.9897	64.677	59.6162	58.3331	69.5536	64.4376	63.978	hypothetical protein (3015 nt)	3641	3015	56.52
TCONS_00001649	XLOC_001563	NA	MGG_06649	TSS1604	=	MGG_06649T0	supercont8.1:2280250-2285362	4664	23.7708	34.2515	23.1604	24.1782	23.9737	33.0541	35.0791	34.6215	EF hand domain-containing protein (3903 nt)	4664	3903	58.16
TCONS_00001650	XLOC_001564	NA	MGG_06650	TSS1605	=	MGG_06650T0	supercont8.1:2285682-2288124	1867	322.97	262.671	385.28	297.198	286.432	312.734	237.841	237.437	tubulin alpha-B chain (1353 nt)	1867	1353	56.69
TCONS_00001651	XLOC_001565	NA	MGG_06652	TSS1606	=	MGG_06652T0	supercont8.1:2288428-2294040	2947	9.69346	9.72835	8.15876	10.2829	10.6387	8.65685	10.679	9.84924	hypothetical protein (2127 nt)	2947	2127	57.69
TCONS_00001652	XLOC_001566	NA	MGG_06654	TSS1607	=	MGG_06654T0	supercont8.1:2299803-2301514	1611	47.3505	52.3039	51.8731	44.8303	45.3482	55.9168	50.6611	50.3339	hypothetical protein (804 nt)	1611	804	59.45
TCONS_00001653	XLOC_001567	NA	MGG_16148	TSS1608	=	MGG_16148T0	supercont8.1:2301677-2305212	1237	0	0.620854	0	0	0	0	0	1.86256	hypothetical protein (825 nt)	1237	825	52.61
TCONS_00001655	XLOC_001567	NA	MGG_16149	TSS1609	=	MGG_16149T0	supercont8.1:2301677-2305212	1496	1129.38	550.461	1487.02	951.182	949.947	719.714	460.275	471.394	ADP,ATP carrier protein (948 nt)	1496	948	59.81
TCONS_00001658	XLOC_001568	NA	MGG_06657	TSS1611	=	MGG_06657T0	supercont8.1:2305728-2307465	882	711.32	520.255	675.688	736.728	721.545	506.868	532.101	521.795	40S ribosomal protein S25 (285 nt)	882	285	59.3
TCONS_00001659	XLOC_001569	NA	MGG_06659	TSS1612	=	MGG_06659T0	supercont8.1:2307568-2310536	1614	11.0185	16.28	11.5152	10.8635	10.6769	16.5594	15.9253	16.3554	hypothetical protein (906 nt)	1614	906	61.04
TCONS_00001660	XLOC_001570	NA	MGG_06661	TSS1613	=	MGG_06661T0	supercont8.1:2310928-2314878	2632	73.5739	87.7023	85.6455	67.6945	67.3816	95.2235	84.0551	83.8283	MFS transporter (1545 nt)	2632	1545	59.16
TCONS_00001661	XLOC_001571	NA	MGG_06666	TSS1614	=	MGG_06666T0	supercont8.1:2322029-2323839	1810	98.1106	202.93	105.694	97.1133	91.5245	204.161	204.763	199.865	hypothetical protein (720 nt)	1810	720	62.36
TCONS_00001662	XLOC_001572	NA	MGG_06669	TSS1615	=	MGG_06669T0	supercont8.1:2328841-2330351	1140	307.335	303.216	287.301	320.675	314.03	273.008	317.202	319.438	hypothetical protein (630 nt)	1140	630	60.79
TCONS_00001665	XLOC_001575	NA	MGG_16154	TSS1618	=	MGG_16154T0	supercont8.1:2355950-2359278	2367	13.8732	15.9824	12.2062	14.8852	14.528	15.3174	15.6405	16.9894	tRNA-pseudouridine synthase (2085 nt)	2367	2085	54.39
TCONS_00001666	XLOC_001576	NA	MGG_06677	TSS1619	=	MGG_06677T0	supercont8.1:2359577-2361530	1731	29.074	29.2118	30.6563	27.9461	28.6194	29.3017	28.8884	29.4453	hypothetical protein (477 nt)	1731	477	57.02
TCONS_00001667	XLOC_001577	NA	MGG_06679	TSS1620	=	MGG_06679T0	supercont8.1:2365689-2369562	3777	0.168432	0.569469	0.263175	0.15447	0.0876504	0.646613	0.601611	0.460182	hypothetical protein (3678 nt)	3777	3678	52.39
TCONS_00001668	XLOC_001578	NA	MGG_06680	TSS1621	=	MGG_06680T0	supercont8.1:2371450-2375424	2377	19.8407	20.1346	21.3283	19.0556	19.138	20.448	19.855	20.1008	nudix/MutT family protein (507 nt)	2377	507	55.82
TCONS_00001669	XLOC_001579	NA	MGG_06682	TSS1622	=	MGG_06682T0	supercont8.1:2377163-2382364	2037	7.92949	6.35599	7.53626	8.36847	7.88375	6.20938	6.81915	6.03944	hypothetical protein (1050 nt)	2037	1050	55.9
TCONS_00001670	XLOC_001580	NA	MGG_06684	TSS1623	=	MGG_06684T0	supercont8.1:2382372-2385324	1943	98.993	30.2597	101.252	99.4914	96.2354	29.5074	29.6345	31.6372	hypothetical protein (831 nt)	1943	831	56.08
TCONS_00001671	XLOC_001581	NA	MGG_06686	TSS1624	=	MGG_06686T0	supercont8.1:2385636-2389666	2805	8.42587	10.2029	9.0111	8.08638	8.18013	11.3697	9.38026	9.85871	hypothetical protein (2313 nt)	2805	2313	60.66
TCONS_00001672	XLOC_001582	NA	MGG_11878	TSS1625	=	MGG_11878T0	supercont8.1:2389945-2392733	2367	19.8748	23.7024	20.3832	19.762	19.4791	24.5548	23.3236	23.2287	hypothetical protein (1191 nt)	2367	1191	52.23
TCONS_00001673	XLOC_001583	NA	MGG_11877	TSS1626	=	MGG_11877T0	supercont8.1:2393320-2394685	1275	80.8829	61.1949	92.0774	77.2275	73.3438	67.5578	57.7982	58.2287	hypothetical protein (396 nt)	1275	396	56.06
TCONS_00001674	XLOC_001584	NA	MGG_11876	TSS1627	=	MGG_11876T0	supercont8.1:2395001-2398405	3086	15.535	30.0237	16.2511	15.4209	14.9328	31.9242	28.7841	29.3627	high affinity glucose transporter (1722 nt)	3086	1722	52.73
TCONS_00001675	XLOC_001585	NA	HPD4	TSS1628	=	MGG_06691T0	supercont8.1:2407316-2408576	1260	3.1635	20.7941	3.64636	2.96931	2.87483	19.4209	21.4738	21.4878	4-hydroxyphenylpyruvate dioxygenase (1260 nt)	1260	1260	59.6
TCONS_00001676	XLOC_001586	NA	MGG_14582	TSS1629	=	MGG_14582T0	supercont8.1:2410464-2410709	183	172.883	145.582	199.919	123.121	195.61	209.004	74.3749	153.366	hypothetical protein (183 nt)	183	183	51.91
TCONS_00001677	XLOC_001587	NA	MGG_06694	TSS1630	=	MGG_06694T0	supercont8.1:2410859-2414866	2266	34.6631	38.1892	42.031	30.8026	31.1555	48.0039	33.6694	32.8942	hypothetical protein (1209 nt)	2266	1209	54.67
TCONS_00001678	XLOC_001588	NA	MGG_16156	TSS1631	=	MGG_16156T0	supercont8.1:2434091-2434722	493	0.419518	0.655612	0.731328	0	0.527228	0.431903	1.07488	0.460055	hypothetical protein (402 nt)	493	402	53.23
TCONS_00001681	XLOC_001591	NA	MGG_06700	TSS1634	=	MGG_06700T0	supercont8.1:2444577-2448685	4022	7.00447	7.05194	6.68863	7.1464	7.17839	7.00381	7.22449	6.92752	TBC domain-containing protein (2949 nt)	4022	2949	56.73
TCONS_00001683	XLOC_001593	NA	MGG_14583	TSS1636	=	MGG_14583T0	supercont8.1:2453361-2456860	3242	24.1276	27.2011	22.7471	25.1119	24.5239	25.8905	28.2587	27.454	DIL and Ankyrin domain-containing protein (2463 nt)	3242	2463	53.76
TCONS_00001684	XLOC_001594	NA	MGG_11871	TSS1637	=	MGG_11871T0	supercont8.1:2457056-2458606	1484	126.315	93.6102	122.748	128.609	127.588	94.0227	93.6626	93.1454	allantoicase (1074 nt)	1484	1074	58.38
TCONS_00001685	XLOC_001595	NA	MGG_06704	TSS1638	=	MGG_06704T0	supercont8.1:2459301-2465768	4488	9.55992	8.24437	9.32222	9.81371	9.54385	9.04418	7.19873	8.4902	glycerophosphodiesterase GDE1 (3570 nt)	4488	3570	52.94
TCONS_00001686	XLOC_001596	NA	MGG_06705	TSS1639	=	MGG_06705T0	supercont8.1:2467555-2468822	920	80.0574	51.101	88.657	78.8486	72.6665	58.9489	48.3456	46.0086	hypothetical protein (483 nt)	920	483	53
TCONS_00001687	XLOC_001597	NA	MGG_06707	TSS1640	=	MGG_06707T0	supercont8.1:2472155-2475416	3032	10.637	18.4923	11.7535	10.1141	10.0433	19.9468	18.1486	17.3816	ATP-binding cassette protein (2214 nt)	3032	2214	56.87
TCONS_00001688	XLOC_001598	NA	MGG_06709	TSS1641	=	MGG_06709T0	supercont8.1:2475696-2479215	3287	52.7688	63.2203	50.6263	53.6599	54.0203	59.6624	63.8062	66.1925	hypothetical protein (1023 nt)	3287	1023	60.7
TCONS_00001689	XLOC_001599	NA	MGG_06710	TSS1642	=	MGG_06710T0	supercont8.1:2479274-2480715	1441	8.76973	9.0509	8.41667	8.94604	8.94647	9.80078	9.30676	8.04516	hypothetical protein (639 nt)	1441	639	59.94
TCONS_00001690	XLOC_001600	NA	MGG_11870	TSS1643	=	MGG_11870T0	supercont8.1:2480917-2483879	2962	28.7522	61.2623	30.942	28.1104	27.2044	65.1954	59.9984	58.5932	hypothetical protein (1836 nt)	2962	1836	64.81
TCONS_00001691	XLOC_001601	NA	MGG_06712	TSS1644	=	MGG_06712T0	supercont8.1:2487326-2490625	3073	262.525	116.788	286.944	249.799	250.832	124.732	112.375	113.256	5-methyltetrahydropteroyltriglutamate-homocysteine S-methyltransferase (2301 nt)	3073	2301	57.15
TCONS_00001692	XLOC_001602	NA	MGG_06713	TSS1645	=	MGG_06713T0	supercont8.1:2491712-2493829	1978	9.72001	10.5989	9.50115	9.66514	9.99372	10.9854	10.1814	10.6298	hypothetical protein (1569 nt)	1978	1569	55.13
TCONS_00001693	XLOC_001603	NA	MGG_14584	TSS1646	=	MGG_14584T0	supercont8.1:2494024-2496539	892	10.1721	16.0477	10.523	7.82737	12.166	16.6783	15.513	15.9517	hypothetical protein (573 nt)	892	573	48.34
TCONS_00001694	XLOC_001604	NA	MGG_06718	TSS1647	=	MGG_06718T0	supercont8.1:2500079-2501304	1136	39.7617	30.671	37.8962	42.1767	39.2121	29.0376	31.1683	31.8072	hypothetical protein (261 nt)	1136	261	64.37
TCONS_00001695	XLOC_001605	NA	MGG_06719	TSS1648	=	MGG_06719T0	supercont8.1:2501470-2504339	2586	272.218	326.754	320.993	249.969	245.691	377.957	302.037	300.268	ATP-citrate synthase subunit 1 (1998 nt)	2586	1998	54.7
TCONS_00001696	XLOC_001606	NA	MGG_06723	TSS1649	=	MGG_06723T0	supercont8.1:2513962-2514860	744	66.0984	129.79	62.5218	66.8326	68.9409	121.312	134.41	133.647	hypothetical protein (744 nt)	744	744	63.17
TCONS_00001697	XLOC_001607	NA	MGG_06724	TSS1650	=	MGG_06724T0	supercont8.1:2515604-2517461	1059	0.93216	1.03776	0.97209	1.00658	0.81781	0.939889	1.32593	0.847455	hypothetical protein (1059 nt)	1059	1059	59.11
TCONS_00001698	XLOC_001608	NA	MGG_06725	TSS1651	=	MGG_06725T0	supercont8.1:2517771-2520353	2582	18.2143	25.5932	21.8041	17.0546	15.7843	30.7529	23.2785	22.7482	hypothetical protein (1290 nt)	2582	1290	54.57
TCONS_00001700	XLOC_001610	NA	MGG_06726	TSS1653	=	MGG_06726T0	supercont8.1:2520857-2523162	2103	157.906	162.194	185.076	146.996	141.647	187.41	150.576	148.596	septin like spn2 (1014 nt)	2103	1014	53.65
TCONS_00001701	XLOC_001611	NA	MGG_06729	TSS1654	=	MGG_06729T0	supercont8.1:2524666-2529237	2656	31.1171	27.7657	33.1807	29.7109	30.4597	28.6554	28.8009	25.8409	hypothetical protein (1371 nt)	2656	1371	60.18
TCONS_00001702	XLOC_001612	NA	MGG_11869	TSS1655	=	MGG_11869T0	supercont8.1:2529830-2530895	774	26.7105	26.3924	31.6787	24.8556	23.5973	30.7125	24.13	24.3347	hypothetical protein (237 nt)	774	237	49.79
TCONS_00001703	XLOC_001613	NA	MGG_16160	TSS1656	=	MGG_16160T0	supercont8.1:2532129-2540310	4261	1.03971	0.239144	0.133194	1.25938	1.72656	0.000271204	0.0561727	0.660987	hypothetical protein (3315 nt)	4261	3315	53.54
TCONS_00001705	XLOC_001613	NA	MGG_16161	TSS1657	=	MGG_16161T0	supercont8.1:2532129-2540310	3614	34.9384	16.7085	34.3903	34.5658	35.8593	16.7398	15.8252	17.5605	hypothetical protein (2616 nt)	3614	2616	52.18
TCONS_00001706	XLOC_001614	NA	MGG_06732	TSS1658	=	MGG_06732T0	supercont8.1:2540437-2543401	2189	21.0169	25.3822	23.6659	19.5839	19.8011	28.3357	23.4737	24.3373	hypothetical protein (1110 nt)	2189	1110	52.97
TCONS_00001707	XLOC_001615	NA	MGG_06734	TSS1659	=	MGG_06734T0	supercont8.1:2543567-2548018	1428	14.8093	13.4809	16.5715	13.9132	13.9432	14.9954	13.2708	12.1763	hypothetical protein (825 nt)	1428	825	57.58
TCONS_00001708	XLOC_001616	NA	MGG_06735	TSS1660	=	MGG_06735T0	supercont8.1:2548293-2551310	2853	14.3707	15.9062	14.2469	14.6019	14.2634	16.5189	15.8172	15.3823	golgi membrane protein (2286 nt)	2853	2286	55.51
TCONS_00001709	XLOC_001617	NA	MGG_06737	TSS1661	=	MGG_06737T0	supercont8.1:2551504-2556768	711	1.49826	1.97789	1.90126	0.919511	1.67401	2.20792	2.04152	1.68422	hypothetical protein (711 nt)	711	711	60.76
TCONS_00001710	XLOC_001618	NA	MGG_06739	TSS1662	=	MGG_06739T0	supercont8.1:2566634-2568760	2010	0.640812	0.642448	0.49004	0.740413	0.691982	0.539004	0.782982	0.605358	hypothetical protein (2010 nt)	2010	2010	53.43
TCONS_00001711	XLOC_001619	NA	MGG_06741	TSS1663	=	MGG_06741T0	supercont8.1:2575677-2576842	1083	12.6604	18.1734	13.7491	13.7111	10.5209	15.0169	20.2292	19.2743	hypothetical protein (594 nt)	1083	594	59.43
TCONS_00001712	XLOC_001620	NA	MGG_06744	TSS1664	=	MGG_06744T0	supercont8.1:2581084-2584567	1070	43.1444	27.3465	36.523	44.9072	48.0029	24.2092	28.3852	29.4452	hypothetical protein (609 nt)	1070	609	64.86
TCONS_00001713	XLOC_001621	NA	MGG_06746	TSS1665	=	MGG_06746T0	supercont8.1:2586474-2587175	423	0	0.131056	0	0	0	0.393169	0	0	hypothetical protein (423 nt)	423	423	58.16
TCONS_00001714	XLOC_001622	NA	MGG_06750	TSS1666	=	MGG_06750T0	supercont8.1:2595873-2599508	3543	5.01301	3.791	5.27096	5.52465	4.24341	3.83235	3.76604	3.7746	hypothetical protein (2247 nt)	3543	2247	55.63
TCONS_00001717	XLOC_001625	NA	MGG_06757	TSS1669	=	MGG_06757T0	supercont8.1:2616446-2617584	978	14.8691	22.1556	13.0212	14.4396	17.1464	21.1434	23.6419	21.6815	ATP-dependent Clp protease (825 nt)	978	825	62.55
TCONS_00001718	XLOC_001626	NA	MGG_06760	TSS1670	=	MGG_06760T0	supercont8.1:2620247-2626811	3539	35.698	30.2297	30.1666	38.1278	38.7997	27.4269	32.5775	30.6848	CAMK protein kinase (2268 nt)	3539	2268	57.89
TCONS_00001719	XLOC_001627	NA	MGG_06761	TSS1671	=	MGG_06761T0	supercont8.1:2628618-2631809	2877	12.6285	5.52908	13.1269	12.4081	12.3505	6.02985	5.3677	5.18969	hypothetical protein (1611 nt)	2877	1611	63.56
TCONS_00001720	XLOC_001628	NA	MGG_06762	TSS1672	=	MGG_06762T0	supercont8.1:2632742-2636133	3308	4.06668	3.73463	4.70997	3.8088	3.68127	4.37465	3.37278	3.45645	hypothetical protein (1872 nt)	3308	1872	55.66
TCONS_00001721	XLOC_001629	NA	MGG_06764	TSS1673	=	MGG_06764T0	supercont8.1:2636770-2640911	2350	85.8832	76.6188	82.2729	87.4116	87.9652	71.9844	79.1171	78.7548	guanylate kinase (729 nt)	2350	729	59.95
TCONS_00001722	XLOC_001630	NA	MGG_06766	TSS1674	=	MGG_06766T0	supercont8.1:2646010-2648895	2885	881.24	216.133	791.587	936.303	915.828	192.891	226.903	228.604	MDJ1 (1692 nt)	2885	1692	55.73
TCONS_00001723	XLOC_001631	NA	MGG_14587	TSS1675	=	MGG_14587T0	supercont8.1:2654217-2657400	2972	4.23173	6.17291	3.3913	4.69666	4.60724	6.12855	5.94357	6.44661	Ser/Thr protein phosphatase (1455 nt)	2972	1455	53.68
TCONS_00001724	XLOC_001632	NA	MGG_06770	TSS1676	=	MGG_06770T0	supercont8.1:2677694-2679077	1383	21.3837	20.968	19.9765	23.6236	20.5509	20.3009	21.6437	20.9595	hypothetical protein (948 nt)	1383	948	63.4
TCONS_00001725	XLOC_001633	NA	MGG_06771	TSS1677	=	MGG_06771T0	supercont8.1:2679450-2680692	675	0.769714	1.42251	1.32408	0.494256	0.49081	1.40727	1.33574	1.52452	hypothetical protein (675 nt)	675	675	62.37
TCONS_00001726	XLOC_001634	NA	MGG_06772	TSS1678	=	MGG_06772T0	supercont8.1:2681723-2682676	832	0.104489	0.168117	0.189338	0.12413	0	0.21687	0.143837	0.143644	hypothetical protein (696 nt)	832	696	59.48
TCONS_00001727	XLOC_001635	NA	MGG_06777	TSS1679	=	MGG_06777T0	supercont8.1:2711363-2713580	1797	30.2189	14.7207	39.1827	24.426	27.0481	18.4265	12.9337	12.8019	sugar transporter STL1 (1539 nt)	1797	1539	57.31
TCONS_00001728	XLOC_001636	NA	MGG_06778	TSS1680	=	MGG_06778T0	supercont8.1:2714190-2717250	2774	12.5573	8.61963	12.6283	12.352	12.6916	8.59093	8.87079	8.39716	C6 zinc finger domain-containing protein (2175 nt)	2774	2175	57.06
TCONS_00001729	XLOC_001637	NA	MGG_06779	TSS1681	=	MGG_06779T0	supercont8.1:2717478-2718709	1071	4.9936	5.44815	5.62851	4.51267	4.83962	5.52254	5.9635	4.85841	NADP-dependent mannitol dehydrogenase (816 nt)	1071	816	64.71
TCONS_00001730	XLOC_001638	NA	MGG_06781	TSS1682	=	MGG_06781T0	supercont8.1:2719456-2723925	1993	12.7977	18.0323	12.0184	13.2336	13.141	18.4269	17.4904	18.1796	hypothetical protein (1365 nt)	1993	1365	65.49
TCONS_00001731	XLOC_001639	NA	MGG_11860	TSS1683	=	MGG_11860T0	supercont8.1:2728340-2734242	5684	1.55928	5.9073	1.7077	1.45442	1.51573	6.36057	5.4633	5.89801	NACHT and WD domain-containing protein (5307 nt)	5684	5307	53.66
TCONS_00001732	XLOC_001640	NA	MGG_11859	TSS1684	=	MGG_11859T0	supercont8.1:2734516-2736366	1475	4.90151	41.671	3.81206	5.31148	5.58098	35.6231	44.4031	44.9868	hypothetical protein (1065 nt)	1475	1065	53.05
TCONS_00001733	XLOC_001641	NA	MGG_06786	TSS1685	=	MGG_06786T0	supercont8.1:2740911-2743886	1844	66.7833	51.0828	68.0297	65.5803	66.7399	51.739	51.0113	50.498	disulfide-isomerase A6 precurso (1416 nt)	1844	1416	55.37
TCONS_00001734	XLOC_001642	NA	MGG_06790	TSS1686	=	MGG_06790T0	supercont8.1:2754783-2756016	1059	0.0890025	0.104607	0.1755	0.0915072	0	0.0489188	0.0530374	0.211864	hypothetical protein (738 nt)	1059	738	57.18
TCONS_00001735	XLOC_001643	NA	MGG_06791	TSS1687	=	MGG_06791T0	supercont8.1:2759999-2761814	1815	0.0770423	0.356292	0.03628	0.146391	0.0484557	0.276994	0.481041	0.31084	hypothetical protein (1815 nt)	1815	1815	65.18
TCONS_00001737	XLOC_001645	NA	MGG_16168	TSS1689	=	MGG_16168T0	supercont8.1:2802224-2803591	1275	0.048801	0	0	0.146403	0	0	0	0	hypothetical protein (1275 nt)	1275	1275	52.47
TCONS_00001739	XLOC_001647	NA	MGG_06807	TSS1691	=	MGG_06807T0	supercont8.1:2821390-2822818	1428	57.6482	60.611	58.6433	57.1275	57.1736	58.9464	61.8935	60.9931	hypothetical protein (1428 nt)	1428	1428	52.45
TCONS_00001740	XLOC_001648	NA	MGG_16173	TSS1692	=	MGG_16173T0	supercont8.1:2825166-2825988	615	0.187865	0.0362913	0	0.376604	0.186991	0	0	0.108874	hypothetical protein (615 nt)	615	615	49.11
TCONS_00001742	XLOC_001650	NA	MGG_16175	TSS1694	=	MGG_16175T0	supercont8.1:2848134-2848661	527	0.878993	0.0488003	1.21078	0.953008	0.47319	0.146401	0	0	hypothetical protein (231 nt)	527	231	46.32
TCONS_00001743	XLOC_001651	NA	MGG_14570	TSS1695	=	MGG_14570T0	supercont8.1:2869347-2870907	945	0	0.020364	0	0	0	0	0.0610921	0	hypothetical protein (945 nt)	945	945	48.78
TCONS_00001745	XLOC_001653	NA	MGG_16180	TSS1697	=	MGG_16180T0	supercont8.1:2885981-2888746	1232	0.686998	0.171106	0.544237	0.381188	1.13557	0.159877	0.265169	0.0882704	hypothetical protein (1179 nt)	1232	1179	51.06
TCONS_00001746	XLOC_001654	NA	MGG_16181	TSS1698	=	MGG_16181T0	supercont8.1:2888934-2895829	3741	28.3382	26.5463	27.3492	28.9563	28.7092	25.1758	26.9335	27.5296	hypothetical protein (3741 nt)	3741	3741	56.94
TCONS_00001747	XLOC_001655	NA	MGG_06823	TSS1699	=	MGG_06823T0	supercont8.1:2899036-2901045	1509	1.41336	1.66054	1.48311	1.26342	1.49355	1.73983	1.53485	1.70695	hypothetical protein (1272 nt)	1509	1272	61.79
TCONS_00001748	XLOC_001656	NA	MGG_11820	TSS1700	=	MGG_11820T0	supercont8.1:2915730-2918758	2824	8.24074	7.30682	9.08105	7.99787	7.6433	8.32686	7.0454	6.5482	hypothetical protein (1641 nt)	2824	1641	52.35
TCONS_00001749	XLOC_001657	NA	MGG_06832	TSS1701	=	MGG_06832T0	supercont8.1:2919177-2921521	1920	2.00495	2.89336	2.18115	1.60393	2.22978	3.23529	3.21555	2.22926	hypothetical protein (1920 nt)	1920	1920	52.97
TCONS_00001750	XLOC_001658	NA	MGG_11818	TSS1702	=	MGG_11818T0	supercont8.1:2923560-2925152	1147	12.4408	14.7308	13.7344	12.2078	11.3803	16.4352	14.0563	13.7009	aldo-keto reductase (894 nt)	1147	894	61.19
TCONS_00001751	XLOC_001659	NA	MGG_11817	TSS1703	=	MGG_11817T0	supercont8.1:2925306-2927475	1980	10.9126	10.1908	9.34466	12.2672	11.1259	8.67888	12.1732	9.72022	C-type cyclin (1482 nt)	1980	1482	55.13
TCONS_00001752	XLOC_001660	NA	MGG_06834	TSS1704	=	MGG_06834T0	supercont8.1:2927946-2929611	1362	0.531078	1.10701	0.309432	0.812917	0.470885	0.848189	1.41388	1.05898	1,4-beta-D-glucan cellobiohydrolase B (1362 nt)	1362	1362	59.91
TCONS_00001753	XLOC_001661	NA	MGG_06836	TSS1705	=	MGG_06836T0	supercont8.1:2932957-2935316	2051	2.37097	1.98015	1.93524	2.55549	2.62219	1.99098	2.12418	1.8253	deoxyribodipyrimidine photo-lyase (1890 nt)	2051	1890	56.72
TCONS_00001754	XLOC_001662	NA	MGG_06837	TSS1706	=	MGG_06837T0	supercont8.1:2936330-2936678	264	533.028	375.29	520.945	559.207	518.932	355.474	394.247	376.149	40S ribosomal protein S21 (264 nt)	264	264	60.61
TCONS_00001755	XLOC_001663	NA	MGG_16186	TSS1707	=	MGG_16186T0	supercont8.1:2947570-2950746	1918	10.1908	6.38641	12.0553	9.40529	9.11167	3.92409	8.00826	7.22689	hypothetical protein (909 nt)	1918	909	61.17
TCONS_00001757	XLOC_001663	NA	MGG_16187	TSS1708	=	MGG_16187T0	supercont8.1:2947570-2950746	827	1129.74	484.676	1130.52	1125.51	1133.18	482.491	482.255	489.282	hypothetical protein (459 nt)	827	459	63.18
TCONS_00001758	XLOC_001664	NA	MGG_16188	TSS1709	=	MGG_16188T0	supercont8.1:2953305-2954274	889	4.00012	3.68638	4.50558	3.98758	3.50719	4.19807	3.36687	3.49421	hypothetical protein (441 nt)	889	441	52.61
TCONS_00001760	XLOC_001666	NA	MGG_06843	TSS1711	=	MGG_06843T0	supercont8.1:2959239-2961797	2407	4.26504	6.22294	4.46367	3.9667	4.36475	6.24167	6.32135	6.10579	alpha-N-arabinofuranosidase 2 (1461 nt)	2407	1461	62.63
TCONS_00001761	XLOC_001667	NA	MGG_06844	TSS1712	=	MGG_06844T0	supercont8.1:2963349-2964478	903	0.320738	0.61623	0.294492	0.335031	0.332692	0.684379	0.776555	0.387756	hypothetical protein (846 nt)	903	846	58.27
TCONS_00001762	XLOC_001668	NA	MGG_06845	TSS1713	=	MGG_06845T0	supercont8.1:2966207-2967004	550	0	0.334295	0	0	0	0.229734	0.386831	0.386319	hypothetical protein (330 nt)	550	330	61.82
TCONS_00001763	XLOC_001669	NA	MGG_06846	TSS1714	=	MGG_06846T0	supercont8.1:2967227-2968518	1291	32.606	30.1318	31.9796	32.4597	33.3787	28.4643	30.8611	31.0699	hypothetical protein (621 nt)	1291	621	57
TCONS_00001764	XLOC_001670	NA	MGG_06851	TSS1715	=	MGG_06851T0	supercont8.1:2985923-2987698	1680	31.9632	46.1171	29.9506	33.1648	32.7741	42.972	48.2155	47.1638	hypothetical protein (1680 nt)	1680	1680	59.05
TCONS_00001765	XLOC_001671	NA	MGG_06854	TSS1716	=	MGG_06854T0	supercont8.1:2994594-2999678	2594	2.47774	3.63229	2.83865	1.97701	2.61755	3.62062	3.66924	3.607	hypothetical protein (1365 nt)	2594	1365	60.29
TCONS_00001766	XLOC_001672	NA	MGG_06856	TSS1717	=	MGG_06856T0	supercont8.1:2999875-3002504	2282	10.0499	9.8294	11.1643	9.54492	9.44049	10.676	9.02831	9.78386	hypothetical protein (1092 nt)	2282	1092	51.65
TCONS_00001767	XLOC_001673	NA	MGG_06858	TSS1718	=	MGG_06858T0	supercont8.1:3005087-3006833	1152	18.9976	32.5407	14.679	21.1487	21.165	29.6686	34.1433	33.8103	hypothetical protein (1152 nt)	1152	1152	52.52
TCONS_00001768	XLOC_001674	NA	MGG_16191	TSS1719	=	MGG_16191T0	supercont8.1:3007336-3007567	162	15.5086	12.7143	0	0	46.5259	24.5957	0	13.5473	hypothetical protein (162 nt)	162	162	56.79
TCONS_00001769	XLOC_001675	NA	MGG_06859	TSS1720	=	MGG_06859T0	supercont8.1:3008138-3010413	1027	94.9833	115.049	106.386	84.9549	93.6089	124.83	107.728	112.588	mago nashi like 2 (474 nt)	1027	474	48.73
TCONS_00001770	XLOC_001676	NA	MGG_06861	TSS1721	=	MGG_06861T0	supercont8.1:3014526-3015199	492	0	2.74159	0	0	0	2.06544	3.5436	2.61574	hypothetical protein (492 nt)	492	492	59.35
TCONS_00001771	XLOC_001677	NA	MGG_06862	TSS1722	=	MGG_06862T1	supercont8.1:3016023-3019380	3180	0.140514	0.164325	0.158032	0.0794406	0.184069	0.175771	0.163818	0.153384	late embryogenesis abundant protein, variant (2640 nt)	3180	2640	60.27
TCONS_00001772	XLOC_001677	NA	MGG_06862	TSS1723	=	MGG_06862T0	supercont8.1:3016023-3019380	2760	8.97e-07	0.0886814	0	2.69e-06	0	0.134941	0.131099	5.04e-06	late embryogenesis abundant protein (2760 nt)	2760	2760	60.47
TCONS_00001773	XLOC_001678	NA	MGG_06863	TSS1724	=	MGG_06863T0	supercont8.1:3020671-3023493	2767	19.7654	18.6389	18.0377	21.452	19.8064	17.3338	18.7168	19.8662	hypothetical protein (1134 nt)	2767	1134	58.99
TCONS_00001774	XLOC_001679	NA	MGG_06865	TSS1725	=	MGG_06865T0	supercont8.1:3026500-3027260	450	8.13175	24.6134	9.24384	7.75666	7.39474	26.6953	22.4227	24.7223	hypothetical protein (450 nt)	450	450	64
TCONS_00001775	XLOC_001680	NA	MGG_06866	TSS1726	=	MGG_06866T0	supercont8.1:3028416-3030059	1228	4.23498	5.62399	3.93684	4.05624	4.71186	5.16638	6.52178	5.1838	hypothetical protein (759 nt)	1228	759	55.47
TCONS_00001777	XLOC_001682	NA	MGG_06872	TSS1728	=	MGG_06872T0	supercont8.1:3063894-3069829	3225	37.5346	66.3942	35.9765	37.0445	39.5828	64.4216	66.7911	67.9697	hypothetical protein (2007 nt)	3225	2007	57.85
TCONS_00001778	XLOC_001683	NA	MGG_16198	TSS1729	=	MGG_16198T0	supercont8.1:3073737-3078101	3459	3.87117	16.5544	3.57886	3.82632	4.20834	13.9526	17.2638	18.4468	hypothetical protein (2904 nt)	3459	2904	57.75
TCONS_00001779	XLOC_001684	NA	MGG_06874	TSS1730	=	MGG_06874T0	supercont8.1:3085441-3087895	2142	43.0665	53.4897	44.3242	41.6562	43.2191	53.6202	53.6371	53.2117	TBC1 domain family member 22A (1749 nt)	2142	1749	54.15
TCONS_00001780	XLOC_001685	NA	MGG_06876	TSS1731	=	MGG_06876T0	supercont8.1:3088054-3090279	1282	97.4984	109.004	102.31	96.7308	93.4545	111.872	107.094	108.045	clathrin light chain (705 nt)	1282	705	57.87
TCONS_00001782	XLOC_001687	NA	MGG_06881	TSS1733	=	MGG_06881T0	supercont8.1:3102673-3108534	2960	49.4668	39.1481	51.5118	48.7142	48.1743	40.4911	39.0661	37.8871	hypothetical protein (1707 nt)	2960	1707	56.77
TCONS_00001783	XLOC_001688	NA	MGG_06883	TSS1734	=	MGG_06883T0	supercont8.1:3108799-3113536	1843	28.8438	21.0653	24.3383	31.9466	30.2465	19.1943	21.1958	22.806	t-SNARE (1074 nt)	1843	1074	57.45
TCONS_00001784	XLOC_001689	NA	MGG_06886	TSS1735	=	MGG_06886T0	supercont8.1:3122916-3126489	2796	0.193286	0.170314	0.0343125	0.3343	0.211246	0.176249	0.176268	0.158426	hypothetical protein (2796 nt)	2796	2796	54.18
TCONS_00001785	XLOC_001690	NA	MGG_06888	TSS1736	=	MGG_06888T0	supercont8.1:3130729-3133497	1700	77.541	33.3592	74.3931	79.1048	79.1251	32.2639	33.6863	34.1274	glutamine synthetase (1074 nt)	1700	1074	58.19
TCONS_00001786	XLOC_001691	NA	MGG_06891	TSS1737	=	MGG_06891T0	supercont8.1:3136942-3138927	1191	2.86285	1.80865	2.73187	3.4132	2.44347	2.06941	1.56444	1.79208	hypothetical protein (1191 nt)	1191	1191	50.97
TCONS_00001787	XLOC_001692	NA	MGG_06893	TSS1738	=	MGG_06893T0	supercont8.1:3144541-3147508	2746	32.1203	47.9869	35.4346	31.1105	29.8158	54.8796	44.2296	44.8516	hypothetical protein (1644 nt)	2746	1644	54.68
TCONS_00001789	XLOC_001693	NA	MGG_16206	TSS1739	=	MGG_16206T0	supercont8.1:3171194-3172448	1137	0	0.00060661	0	0	0	0.000298944	1.22e-06	0.00151966	hypothetical protein (390 nt)	1137	390	52.31
TCONS_00001790	XLOC_001693	NA	MGG_16206	TSS1739	=	MGG_16206T1	supercont8.1:3171194-3172448	819	0.0390955	0.046374	0.117287	0	0	0.0657117	0.0734102	0	hypothetical protein, variant (390 nt)	819	390	52.31
TCONS_00001792	XLOC_001695	NA	MGG_16208	TSS1741	=	MGG_16208T0	supercont8.1:3181860-3182652	659	1.78583	1.31908	2.46841	1.70436	1.18474	2.18216	0.690868	1.0842	hypothetical protein (303 nt)	659	303	48.18
TCONS_00001793	XLOC_001696	NA	MGG_06900	TSS1742	=	MGG_06900T0	supercont8.1:3187132-3189954	2311	17.061	2.03906	16.3002	17.7074	17.1754	1.72199	2.23157	2.16363	hypothetical protein (2214 nt)	2311	2214	52.48
TCONS_00001794	XLOC_001697	NA	MGG_06901	TSS1743	=	MGG_06901T0	supercont8.1:3190782-3193328	2155	31.1204	20.1213	31.1115	30.5711	31.6787	20.4198	18.735	21.2089	hypothetical protein (1323 nt)	2155	1323	58.28
TCONS_00001795	XLOC_001698	NA	MGG_06902	TSS1744	=	MGG_06902T0	supercont8.1:3193515-3196887	3372	120.327	125.321	115.952	122.437	122.592	122.44	127.417	126.105	hypothetical protein (1500 nt)	3372	1500	55.4
TCONS_00001796	XLOC_001699	NA	MGG_11797	TSS1745	=	MGG_11797T0	supercont8.1:3198398-3198563	165	65.2456	3.90542	0	117.854	77.883	0	11.7163	0	hypothetical protein (165 nt)	165	165	55.76
TCONS_00001797	XLOC_001700	NA	MGG_06905	TSS1746	=	MGG_06905T0	supercont8.1:3204692-3210267	5485	14.7409	13.7962	13.8197	15.0166	15.3862	12.8471	14.4407	14.1008	protein transporter sec73 (4590 nt)	5485	4590	54.16
TCONS_00001798	XLOC_001701	NA	MGG_06908	TSS1747	=	MGG_06908T0	supercont8.1:3214891-3218321	2205	6.95878	4.68765	6.41805	6.84304	7.61524	4.35301	5.10898	4.60095	DNA polymerase beta (1749 nt)	2205	1749	53.52
TCONS_00001799	XLOC_001702	NA	SEC23	TSS1748	=	MGG_06910T0	supercont8.1:3220832-3224039	2755	338.693	125.468	357.735	330.02	328.323	129.91	123.751	122.743	protein transporter SEC23 (2313 nt)	2755	2313	56.03
TCONS_00001800	XLOC_001703	NA	MGG_06912	TSS1749	=	MGG_06912T0	supercont8.1:3224142-3228810	2663	11.2719	13.3683	11.0276	11.3702	11.4178	13.5774	13.1336	13.394	hypothetical protein (1566 nt)	2663	1566	55.24
TCONS_00001801	XLOC_001704	NA	MGG_06913	TSS1750	=	MGG_06913T0	supercont8.1:3229125-3231633	1974	89.0543	91.3114	99.3465	83.6715	84.1449	99.213	88.1022	86.6189	seryl-tRNA synthetase (1494 nt)	1974	1494	55.22
TCONS_00001802	XLOC_001705	NA	MGG_06914	TSS1751	=	MGG_06914T0	supercont8.1:3231847-3233780	1627	56.1612	49.7013	61.9663	55.591	50.9263	52.6911	48.7188	47.6939	GTP-binding protein rhb1 (567 nt)	1627	567	54.85
TCONS_00001803	XLOC_001706	NA	MGG_11796	TSS1752	=	MGG_11796T0	supercont8.1:3234658-3238048	3328	10.7625	10.9199	10.0157	10.647	11.6247	10.1355	11.5757	11.0485	hypothetical protein (2694 nt)	3328	2694	51.45
TCONS_00001804	XLOC_001707	NA	MGG_06916	TSS1753	=	MGG_06916T0	supercont8.1:3238454-3240867	1006	66.3831	99.5439	60.8057	69.9973	68.3465	95.7604	102.323	100.549	transcription elongation factor (372 nt)	1006	372	54.57
TCONS_00001805	XLOC_001708	NA	MGG_14565	TSS1754	=	MGG_14565T0	supercont8.1:3247167-3250709	564	0	0.0887623	0	0	0	0.142391	0	0.123896	hypothetical protein (564 nt)	564	564	55.32
TCONS_00001806	XLOC_001709	NA	MGG_16211	TSS1755	=	MGG_16211T0	supercont8.1:3254399-3268024	1407	4.55243	2.53338	1.41188	6.93937	5.30604	0	3.77692	3.82323	hypothetical protein (948 nt)	1407	948	60.44
TCONS_00001808	XLOC_001709	NA	MGG_16212	TSS1757	=	MGG_16212T0	supercont8.1:3254399-3268024	1101	15.4392	18.6165	13.1295	18.2176	14.9706	16.5998	19.5845	19.6652	hypothetical protein (528 nt)	1101	528	54.36
TCONS_00001809	XLOC_001709	NA	MGG_16213	TSS1756	=	MGG_16213T0	supercont8.1:3254399-3268024	6225	20.9841	26.6762	21.0224	21.7299	20.1999	26.396	26.4938	27.1389	hypothetical protein (4773 nt)	6225	4773	54.1
TCONS_00001812	XLOC_001710	NA	MGG_11794	TSS1759	=	MGG_11794T0	supercont8.1:3269726-3272136	2092	106.759	92.2395	100.059	110.054	110.163	85.8884	95.8847	94.9454	D-3-phosphoglycerate dehydrogenase 2 (1419 nt)	2092	1419	56.87
TCONS_00001813	XLOC_001711	NA	MGG_06924	TSS1760	=	MGG_06924T0	supercont8.1:3272475-3274821	2012	373.886	390.35	365.916	379.675	376.067	388.272	392.7	390.077	nucleosome assembly protein (1215 nt)	2012	1215	54.81
TCONS_00001814	XLOC_001712	NA	MGG_06927	TSS1761	=	MGG_06927T0	supercont8.1:3281770-3284211	656	286.395	284.725	274.998	301.406	282.781	261.238	293.441	299.498	hypothetical protein (207 nt)	656	207	59.42
TCONS_00001815	XLOC_001713	NA	MGG_06929	TSS1762	=	MGG_06929T0	supercont8.1:3284299-3289084	1784	28.1878	20.9057	24.239	29.0536	31.2709	18.6385	21.6651	22.4136	hypothetical protein (657 nt)	1784	657	55.4
TCONS_00001816	XLOC_001714	NA	MGG_06931	TSS1763	=	MGG_06931T0	supercont8.1:3289437-3293662	1974	15.7475	15.4188	15.0487	16.4855	15.7082	14.5317	15.4611	16.2636	glycoprotein endopeptidase kae-1 (1362 nt)	1974	1362	62.19
TCONS_00001817	XLOC_001715	NA	MGG_06932	TSS1764	=	MGG_06932T0	supercont8.1:3294358-3297081	2472	54.3083	26.9176	60.7304	51.7265	50.468	28.9213	26.6376	25.194	hypothetical protein (1737 nt)	2472	1737	52.5
TCONS_00001818	XLOC_001716	NA	MGG_06934	TSS1765	=	MGG_06934T0	supercont8.1:3300595-3305786	4122	25.0819	5.94366	22.3114	26.7908	26.1435	5.34585	6.56184	5.92328	hypothetical protein (1215 nt)	4122	1215	54.4
TCONS_00001820	XLOC_001718	NA	MGG_06935	TSS1767	=	MGG_06935T0	supercont8.1:3311895-3313582	1624	65.8241	40.1219	65.7885	64.0058	67.678	39.2975	40.8981	40.17	40S ribosomal protein S9 (924 nt)	1624	924	58.12
TCONS_00001821	XLOC_001719	NA	MGG_06937	TSS1768	=	MGG_06937T0	supercont8.1:3315804-3318192	2275	12.8163	13.4003	12.7399	12.1233	13.5857	12.7577	13.2684	14.1749	NIF domain-containing protein (1458 nt)	2275	1458	58.09
TCONS_00001822	XLOC_001720	NA	MGG_06939	TSS1769	=	MGG_06939T0	supercont8.1:3318322-3322253	2544	9.47013	5.64584	9.26344	9.48974	9.65721	5.4296	6.14794	5.35997	ABC1 protein (2181 nt)	2544	2181	61.3
TCONS_00001823	XLOC_001721	NA	MGG_06940	TSS1770	=	MGG_06940T0	supercont8.1:3322600-3324398	1798	10.6256	9.24123	11.0966	9.41911	11.361	9.23445	9.12228	9.36695	hypothetical protein (1353 nt)	1798	1353	55.06
TCONS_00001824	XLOC_001722	NA	MGG_06942	TSS1771	=	MGG_06942T0	supercont8.1:3324576-3327581	462	23.4048	15.016	22.0971	22.2232	25.8942	14.3942	18.5046	12.1491	hypothetical protein (462 nt)	462	462	55.63
TCONS_00001825	XLOC_001723	NA	MGG_06944	TSS1772	=	MGG_06944T0	supercont8.1:3327982-3330147	1338	5.9961	8.17507	5.58053	6.43242	5.97535	6.93422	8.50091	9.09009	zinc finger protein RTS2 (987 nt)	1338	987	55.93
TCONS_00001826	XLOC_001724	NA	MGG_16217	TSS1773	=	MGG_16217T0	supercont8.1:3334728-3335072	295	0	0.168092	0	0	0	0.504275	0	0	hypothetical protein (210 nt)	295	210	50.95
TCONS_00001827	XLOC_001725	NA	MGG_06948	TSS1774	=	MGG_06948T0	supercont8.1:3336919-3343267	1353	16.7374	27.5241	15.5211	16.7261	17.9651	22.8467	30.4762	29.2493	hypothetical protein (537 nt)	1353	537	62.94
TCONS_00001828	XLOC_001726	NA	MGG_06950	TSS1775	=	MGG_06950T0	supercont8.1:3343459-3348326	1701	5.04815	25.5946	5.15268	5.14419	4.84758	27.2055	23.8022	25.7761	L-serine dehydratase (1035 nt)	1701	1035	64.06
TCONS_00001829	XLOC_001727	NA	MGG_06951	TSS1776	=	MGG_06951T0	supercont8.1:3349753-3352932	1787	103.354	125.195	126.637	91.5151	91.9102	154.594	111.49	109.499	CAAX prenyl protease 1 (1380 nt)	1787	1380	53.04
TCONS_00001831	XLOC_001727	NA	MGG_16223	TSS1777	=	MGG_16223T0	supercont8.1:3349753-3352932	940	13.8002	13.8525	14.9648	12.7355	13.7004	15.558	14.1454	11.8539	hypothetical protein (264 nt)	940	264	51.14
TCONS_00001832	XLOC_001728	NA	MGG_06953	TSS1778	=	MGG_06953T0	supercont8.1:3355872-3356860	918	1386.48	4615.73	1329.5	1406.91	1423.04	4420.93	4717.12	4709.14	hypothetical protein (417 nt)	918	417	64.75
TCONS_00001833	XLOC_001729	NA	MGG_06954	TSS1779	=	MGG_06954T0	supercont8.1:3359701-3362981	2815	30.7696	40.8478	30.5828	31.3773	30.3487	42.0156	40.0727	40.4552	hypothetical protein (2124 nt)	2815	2124	56.4
TCONS_00001834	XLOC_001730	NA	MGG_06956	TSS1780	=	MGG_06956T0	supercont8.1:3368259-3368988	648	8.68549	0.8097	6.05188	9.77631	10.2283	0.408408	1.21306	0.807631	hypothetical protein (648 nt)	648	648	63.73
TCONS_00001835	XLOC_001731	NA	MGG_06957	TSS1781	=	MGG_06957T0	supercont8.1:3370505-3371848	852	41.3176	28.1897	47.3083	39.8357	36.8088	27.4289	27.7531	29.3871	dienelactone hydrolase (852 nt)	852	852	53.76
TCONS_00001837	XLOC_001733	NA	MGG_06959	TSS1783	=	MGG_06959T0	supercont8.1:3377222-3378692	1470	16.9775	16.872	16.7705	16.245	17.9169	17.0265	16.5726	17.0169	ribonuclease H2 subunit A (1068 nt)	1470	1068	60.86
TCONS_00001838	XLOC_001734	NA	MGG_06961	TSS1784	=	MGG_06961T0	supercont8.1:3382450-3384157	1621	27.2132	26.1148	24.5758	28.3283	28.7356	25.2782	26.262	26.8042	hypothetical protein (861 nt)	1621	861	61.09
TCONS_00001839	XLOC_001735	NA	MGG_14564	TSS1785	=	MGG_14564T0	supercont8.1:3389361-3390604	636	0.51295	0.100096	0.466618	0.537991	0.534242	0.0928931	0	0.207394	hypothetical protein (636 nt)	636	636	53.62
TCONS_00001841	XLOC_001737	NA	MGG_06964	TSS1787	=	MGG_06964T0	supercont8.1:3392673-3394373	1700	91.5714	139.293	83.0416	95.283	96.3897	123.338	148.086	146.456	hypothetical protein (825 nt)	1700	825	59.39
TCONS_00001842	XLOC_001738	NA	MGG_06966	TSS1788	=	MGG_06966T0	supercont8.1:3394493-3401150	3516	1.765	1.23777	1.71379	1.76132	1.81988	1.0644	1.28396	1.36494	hypothetical protein (2997 nt)	3516	2997	56.26
TCONS_00001843	XLOC_001739	NA	MGG_06968	TSS1789	=	MGG_06968T0	supercont8.1:3404860-3407353	2256	44.1245	37.2599	53.7534	39.5819	39.0382	43.9172	32.8317	35.0308	WD repeat-containing protein (1182 nt)	2256	1182	52.71
TCONS_00001844	XLOC_001740	NA	MGG_16227	TSS1790	=	MGG_16227T0	supercont8.1:3414195-3414791	409	1.11867	0.287323	1.51478	0.739562	1.10166	0.221312	0.42729	0.213368	hypothetical protein (183 nt)	409	183	55.74
TCONS_00001845	XLOC_001741	NA	MGG_06972	TSS1791	=	MGG_06972T0	supercont8.1:3422142-3422996	675	1.8618	5.47432	1.31679	2.14177	2.12684	4.98153	5.62919	5.81225	hypothetical protein (675 nt)	675	675	65.78
TCONS_00001846	XLOC_001742	NA	MGG_06973	TSS1792	=	MGG_06973T0	supercont8.1:3423440-3425404	1569	0.284743	0.63472	0.223352	0.345212	0.285664	0.637236	0.700567	0.566358	cytochrome P450 52A1 (1569 nt)	1569	1569	58.76
TCONS_00001847	XLOC_001743	NA	MGG_16229	TSS1793	=	MGG_16229T0	supercont8.1:3428457-3428810	162	0	9.06359	0	0	0	0	27.1908	0	hypothetical protein (162 nt)	162	162	56.79
TCONS_00001848	XLOC_001744	NA	MGG_06975	TSS1794	=	MGG_06975T0	supercont8.1:3436777-3440015	2670	0.0212176	0.00616626	0	0.0319382	0.0317146	0	0	0.0184988	hypothetical protein (2670 nt)	2670	2670	53.71
TCONS_00001849	XLOC_001745	NA	MGG_06980	TSS1795	=	MGG_06980T0	supercont8.1:3451007-3453887	1983	1.18052	0.592804	1.64821	0.795807	1.09755	0.753557	0.512775	0.51208	hypothetical protein (1983 nt)	1983	1983	57.59
TCONS_00001850	XLOC_001746	NA	MGG_14563	TSS1796	=	MGG_14563T0	supercont8.1:3456037-3467097	4675	28.4184	38.1559	30.0778	28.4945	26.683	40.6638	36.5077	37.2962	RNA-binding protein (3162 nt)	4675	3162	57.08
TCONS_00001851	XLOC_001747	NA	MGG_16232	TSS1797	=	MGG_16232T0	supercont8.1:3468902-3469645	428	0.233026	0.333429	0.361836	0	0.337241	0.215968	0.196272	0.588048	hypothetical protein (192 nt)	428	192	45.31
TCONS_00001852	XLOC_001748	NA	MGG_06985	TSS1798	=	MGG_06985T0	supercont8.1:3470260-3476416	2254	11.9274	14.3258	11.489	12.1702	12.1231	13.3174	15.0736	14.5862	hypothetical protein (1647 nt)	2254	1647	64.66
TCONS_00001853	XLOC_001749	NA	MGG_11785	TSS1799	=	MGG_11785T0	supercont8.1:3484365-3485823	1035	718.358	480.6	709.706	726.249	719.118	472.471	484.145	485.182	60S ribosomal protein L15 (612 nt)	1035	612	61.6
TCONS_00001854	XLOC_001750	NA	MGG_11784	TSS1800	=	MGG_11784T0	supercont8.1:3486463-3491563	3609	119.772	40.9269	109.229	123.615	126.473	37.4779	42.506	42.7969	hypothetical protein (3609 nt)	3609	3609	54.84
TCONS_00001855	XLOC_001751	NA	MGG_06992	TSS1801	=	MGG_06992T0	supercont8.1:3495865-3499103	2924	275.382	66.0247	307.624	257.704	260.818	76.9255	60.8841	60.2645	hypothetical protein (843 nt)	2924	843	57.18
TCONS_00001857	XLOC_001753	NA	MGG_06994	TSS1803	=	MGG_06994T0	supercont8.1:3512074-3513783	1709	237.912	212.551	254.625	235.799	223.313	226.292	203.218	208.143	hypothetical protein (270 nt)	1709	270	62.96
TCONS_00001858	XLOC_001754	NA	MGG_06996	TSS1804	=	MGG_06996T0	supercont8.1:3514073-3516807	1033	42.8426	81.2796	39.6737	45.664	43.1902	73.675	85.03	85.1339	hypothetical protein (324 nt)	1033	324	58.95
TCONS_00001859	XLOC_001755	NA	MGG_14561	TSS1805	=	MGG_14561T0	supercont8.1:3524090-3526853	1903	364.334	159.308	356.542	370.261	366.199	157.206	154.54	166.177	regulatory protein Cys-3 (909 nt)	1903	909	55.45
TCONS_00001860	XLOC_001756	NA	MGG_06999	TSS1806	=	MGG_06999T0	supercont8.1:3528725-3532385	1779	21.9159	21.2753	19.0036	22.907	23.837	19.232	22.0229	22.571	hypothetical protein (1545 nt)	1779	1545	58.12
TCONS_00001861	XLOC_001757	NA	MGG_07002	TSS1807	=	MGG_07002T0	supercont8.1:3543227-3544078	475	0	0.214957	0	0	0	0.31828	0.163402	0.163188	hypothetical protein (321 nt)	475	321	53.27
TCONS_00001862	XLOC_001758	NA	MGG_16238	TSS1808	=	MGG_16238T0	supercont8.1:3550577-3550995	273	0	0.193835	0	0	0	0	0.581505	0	hypothetical protein (273 nt)	273	273	48.35
TCONS_00001863	XLOC_001759	NA	RPS0	TSS1809	=	MGG_11776T0	supercont8.1:3557610-3559351	1497	688.451	469.553	618.571	731.648	715.134	425.086	490.465	493.107	40S ribosomal protein S0 (864 nt)	1497	864	63.89
TCONS_00001864	XLOC_001760	NA	MGG_07007	TSS1810	=	MGG_07007T0	supercont8.1:3560031-3562865	1595	79.0358	84.5392	88.1033	75.27	73.7342	93.0938	83.7189	76.8047	V-type proton ATPase subunit D (1101 nt)	1595	1101	54.41
TCONS_00001865	XLOC_001761	NA	MGG_07010	TSS1811	=	MGG_07010T0	supercont8.1:3565960-3568792	1556	74.6929	69.9706	70.6308	77.4273	76.0205	66.5377	71.2644	72.1097	translation machinery-associated protein 46 (1038 nt)	1556	1038	56.94
TCONS_00001866	XLOC_001762	NA	MGG_07012	TSS1812	=	MGG_07012T0	supercont8.1:3572441-3575372	2679	73.3411	69.1561	67.7206	75.642	76.6608	62.9387	72.2954	72.2341	AGC/RSK protein kinase (1644 nt)	2679	1644	55.35
TCONS_00001867	XLOC_001763	NA	MGG_07013	TSS1813	=	MGG_07013T0	supercont8.1:3576481-3578178	1532	1.0888	2.55494	1.14318	1.35994	0.763285	2.62855	2.57123	2.46504	hypothetical protein (1413 nt)	1532	1413	52.02
TCONS_00001868	XLOC_001764	NA	MGG_07014	TSS1814	=	MGG_07014T0	supercont8.1:3579561-3583717	4006	10.9321	8.73455	13.412	9.35422	10.0301	10.0204	8.30154	7.88174	DNA repair protein RAD16 (2961 nt)	4006	2961	51.77
TCONS_00001869	XLOC_001765	NA	MGG_07016	TSS1815	=	MGG_07016T0	supercont8.1:3583898-3588288	1394	8.8015	7.79333	8.39833	9.4946	8.51156	6.34168	9.02152	8.01678	hypothetical protein (1047 nt)	1394	1047	63.61
TCONS_00001870	XLOC_001766	NA	MGG_07018	TSS1816	=	MGG_07018T0	supercont8.1:3592478-3593420	874	17.6229	13.1298	18.0488	18.5153	16.3046	14.1041	12.2803	13.005	hypothetical protein (438 nt)	874	438	65.07
TCONS_00001871	XLOC_001767	NA	MGG_09170	TSS1817	=	MGG_09170T0	supercont8.1:3603912-3609958	5251	48.0789	41.4771	44.3558	50.9339	48.9471	38.6887	42.3613	43.3814	hypothetical protein (3303 nt)	5251	3303	56.37
TCONS_00001872	XLOC_001768	NA	MGG_09171	TSS1818	=	MGG_09171T0	supercont8.1:3610640-3611852	1152	1.18728	0.996617	1.33941	1.07396	1.14849	1.12349	0.957736	0.908622	tetracycline resistance protein transposon (1152 nt)	1152	1152	54.77
TCONS_00001873	XLOC_001769	NA	MGG_09173	TSS1819	=	MGG_09173T0	supercont8.1:3617837-3619404	1322	8.46193	11.4202	9.10213	7.64613	8.63752	12.8021	11.0616	10.3968	deoxyhypusine synthase (1095 nt)	1322	1095	61.19
TCONS_00001874	XLOC_001770	NA	MGG_09176	TSS1820	=	MGG_09176T0	supercont8.1:3631661-3632414	642	0	0.0677669	0	0	0	0.100857	0.102443	0	hypothetical protein (642 nt)	642	642	57.01
TCONS_00001875	XLOC_001771	NA	MGG_09181	TSS1821	=	MGG_09181T0	supercont8.1:3644339-3645575	1119	34.843	40.5349	35.6352	34.5677	34.3261	37.4959	43.0492	41.0595	hydroxymethylglutaryl-CoA lyase (1119 nt)	1119	1119	62.82
TCONS_00001876	XLOC_001772	NA	MGG_09182	TSS1822	=	MGG_09182T0	supercont8.1:3646308-3647121	813	0.6241	0.700682	0.852291	0.51179	0.508218	0.620894	0.444763	1.03639	hypothetical protein (813 nt)	813	813	65.07
TCONS_00001877	XLOC_001773	NA	MGG_09183	TSS1823	=	MGG_09183T0	supercont8.1:3648372-3648810	438	0	0.267758	0	0	0	0.615058	0.188216	0	hypothetical protein (438 nt)	438	438	56.16
TCONS_00001878	XLOC_001774	NA	MGG_09185	TSS1824	=	MGG_09185T0	supercont8.1:3650290-3657204	3684	1.08831	0.891552	1.07593	0.974182	1.21482	0.901804	0.86733	0.905522	hypothetical protein (3684 nt)	3684	3684	62.92
TCONS_00001880	XLOC_001776	NA	MGG_09194	TSS1826	=	MGG_09194T0	supercont8.1:3695226-3697030	1276	555.228	349.288	592.734	533.657	539.294	367.181	334.894	345.789	60S ribosomal protein L17 (561 nt)	1276	561	63.46
TCONS_00001881	XLOC_001777	NA	MGG_09196	TSS1827	=	MGG_09196T0	supercont8.1:3699391-3701130	1158	0.372935	0.0805086	0.38165	0.492585	0.244571	0.146477	0	0.0950489	hypothetical protein (1158 nt)	1158	1158	53.63
TCONS_00001883	XLOC_001779	NA	MGG_09199	TSS1829	=	MGG_09199T0	supercont8.1:3712154-3714298	2144	7.26153	6.86382	7.80603	6.20551	7.77307	6.86477	6.4449	7.28179	repressible acid phosphatase (1422 nt)	2144	1422	60.69
TCONS_00001884	XLOC_001780	NA	MGG_09200	TSS1830	=	MGG_09200T0	supercont8.1:3714384-3720337	2640	282.921	306.707	261.159	294.818	292.786	279.678	321.151	319.292	zinc finger protein (1824 nt)	2640	1824	57.51
TCONS_00001885	XLOC_001781	NA	MGG_16242	TSS1831	=	MGG_16242T0	supercont8.1:3733847-3735082	564	0	0.118719	0	0	0	0.108202	0.12406	0.123896	hypothetical protein (564 nt) Note(s): Short internal exon	564	564	54.08
TCONS_00001886	XLOC_001782	NA	MGG_09204	TSS1832	=	MGG_09204T0	supercont8.1:3735679-3737560	1498	52.2611	66.8634	54.9706	51.085	50.7277	68.6943	66.1332	65.7627	hypothetical protein (771 nt)	1498	771	59.66
TCONS_00001888	XLOC_001784	NA	MGG_09208	TSS1834	=	MGG_09208T0	supercont8.1:3763543-3768323	4624	56.3199	42.4473	58.2958	56.967	53.697	41.826	41.9387	43.5772	transportin-2 (2826 nt)	4624	2826	53.43
TCONS_00001889	XLOC_001785	NA	MGG_09213	TSS1835	=	MGG_09213T0	supercont8.1:3782984-3787531	2910	32.4477	22.5634	32.2364	32.9578	32.1488	22.5318	22.5439	22.6145	phosphatidylserine decarboxylase proenzyme 1 (1611 nt)	2910	1611	60.52
TCONS_00001890	XLOC_001786	NA	MGG_09216	TSS1836	=	MGG_09216T0	supercont8.1:3797886-3805681	1091	43.9324	44.1666	37.179	48.2663	46.3518	42.3412	45.3652	44.7934	hypothetical protein (456 nt)	1091	456	64.69
TCONS_00001891	XLOC_001787	NA	MGG_09218	TSS1837	=	MGG_09218T0	supercont8.1:3805778-3809006	1320	8.45289	26.3442	10.5871	6.81646	7.95507	27.4079	26.9698	24.655	oxidoreductase (855 nt)	1320	855	67.6
TCONS_00001892	XLOC_001788	NA	MGG_09219	TSS1838	=	MGG_09219T0	supercont8.1:3809185-3810970	1654	34.6595	40.3934	30.1877	34.4603	39.3305	37.3835	41.7541	42.0427	hypothetical protein (933 nt)	1654	933	67.63
TCONS_00001893	XLOC_001789	NA	MGG_09220	TSS1839	=	MGG_09220T0	supercont8.1:3811847-3812228	381	0.821736	0	0.768995	0.851047	0.845166	0	0	0	hypothetical protein (381 nt)	381	381	54.59
TCONS_00001896	XLOC_001790	NA	MGG_16248	TSS1841	=	MGG_16248T0	supercont8.1:3812973-3819057	1164	659.31	420.297	720.621	626.449	630.86	433.036	408.019	419.836	30S ribosomal protein S5 (798 nt)	1164	798	61.28
TCONS_00001897	XLOC_001791	NA	MGG_09226	TSS1842	=	MGG_09226T0	supercont8.1:3827385-3829413	2028	372.893	38.5405	380.051	372.695	365.932	39.1184	38.8398	37.6633	fumarate reductase (1611 nt)	2028	1611	56.73
TCONS_00001898	XLOC_001792	NA	MGG_09227	TSS1843	=	MGG_09227T0	supercont8.1:3830824-3832999	2175	14.9369	23.2801	14.8519	15.2509	14.708	21.8072	23.547	24.4862	hypothetical protein (1377 nt)	2175	1377	64.71
TCONS_00001899	XLOC_001793	NA	MGG_11761	TSS1844	=	MGG_11761T0	supercont8.1:3833867-3837216	3349	35.9044	42.9565	29.8711	38.7207	39.1214	38.4244	45.2097	45.2354	hypothetical protein (1857 nt)	3349	1857	59.29
TCONS_00001900	XLOC_001794	NA	MGG_14552	TSS1845	=	MGG_14552T0	supercont8.1:3842457-3843342	819	5.18585	5.20156	4.69883	5.3221	5.53662	4.45324	5.43272	5.71871	endonuclease/exonuclease/phosphatase (819 nt)	819	819	65.32
TCONS_00001901	XLOC_001795	NA	MGG_09234	TSS1846	=	MGG_09234T0	supercont8.1:3861531-3864823	1218	2.52719	4.52235	2.57774	2.24115	2.76267	5.28366	4.97272	3.31067	carbonate dehydratase (510 nt)	1218	510	63.33
TCONS_00001903	XLOC_001796	NA	MGG_09235	TSS1847	=	MGG_09235T0	supercont8.1:3865662-3868382	2633	72.322	58.5525	68.0086	76.2912	72.6662	56.7014	60.4956	58.4604	DnaJ domain-containing protein (1623 nt)	2633	1623	64.08
TCONS_00001904	XLOC_001797	NA	MGG_09236	TSS1848	=	MGG_09236T0	supercont8.1:3868615-3872579	3964	25.5812	17.7937	21.5093	27.5365	27.6977	15.0496	19.4887	18.8427	hypothetical protein (2571 nt)	3964	2571	55.85
TCONS_00001905	XLOC_001798	NA	MGG_11757	TSS1849	=	MGG_11757T0	supercont8.1:3873308-3877810	3000	7.70665	7.50345	7.42411	7.60872	8.08711	7.87486	7.45339	7.1821	DNA damage response protein RcaA (2646 nt)	3000	2646	56.39
TCONS_00001906	XLOC_001799	NA	MGG_09238	TSS1850	=	MGG_09238T0	supercont8.1:3877971-3879780	1720	6.8972	14.9635	5.50289	7.87929	7.30941	12.6896	16.1114	16.0895	hypothetical protein (879 nt)	1720	879	55.75
TCONS_00001907	XLOC_001800	NA	MGG_16253	TSS1851	=	MGG_16253T0	supercont8.1:3879958-3884169	617	0.0624697	0.366495	0	0.187409	0	0.340109	0.651018	0.108359	hypothetical protein (591 nt)	617	591	52.28
TCONS_00001909	XLOC_001802	NA	MGG_09242	TSS1853	=	MGG_09242T0	supercont8.1:3893153-3897461	2233	25.7342	33.0649	27.8495	24.0482	25.305	34.7243	31.7625	32.7078	hypothetical protein (948 nt)	2233	948	61.71
TCONS_00001910	XLOC_001803	NA	MGG_09244	TSS1854	=	MGG_09244T0	supercont8.1:3899432-3902956	3453	45.8412	26.7169	43.7173	47.068	46.7383	26.1754	27.006	26.9693	hypothetical protein (1959 nt)	3453	1959	56.46
TCONS_00001911	XLOC_001804	NA	MGG_16256	TSS1855	=	MGG_16256T0	supercont8.1:3905565-3907314	387	0	0.161355	0	0	0	0.24633	0	0.237735	hypothetical protein (279 nt)	387	279	51.97
TCONS_00001912	XLOC_001805	NA	MGG_09248	TSS1856	=	MGG_09248T0	supercont8.1:3916835-3917585	489	0.179382	5.67295	0	0.538146	0	4.57659	5.75862	6.68365	hypothetical protein (489 nt)	489	489	66.87
TCONS_00001913	XLOC_001806	NA	MGG_09249	TSS1857	=	MGG_09249T0	supercont8.1:3918265-3921070	2591	89.0208	69.0717	88.9127	88.7138	89.4358	66.5187	70.5681	70.1284	peptidase S9 prolyl oligopeptidase active site-containing protein (2013 nt)	2591	2013	61.2
TCONS_00001914	XLOC_001807	NA	MGG_09250	TSS1858	=	MGG_09250T0	supercont8.1:3922252-3925056	1932	8.77669	9.07659	9.41384	8.55584	8.36039	9.11149	8.89385	9.22442	gamma-butyrobetaine dioxygenase (1932 nt)	1932	1932	58.59
TCONS_00001915	XLOC_001808	NA	MGG_16257	TSS1859	=	MGG_16257T0	supercont8.1:3925428-3925973	240	0	2.02733	0	0	0	3.22059	1.90835	0.953032	hypothetical protein (240 nt)	240	240	55
TCONS_00001917	XLOC_001810	NA	MGG_09251	TSS1861	=	MGG_09251T0	supercont8.1:3930404-3931723	882	0.038364	0.0444296	0	0.115092	0	0	0.0666891	0.0665996	hypothetical protein (882 nt)	882	882	50.45
TCONS_00001918	XLOC_001811	NA	MGG_09254	TSS1862	=	MGG_09254T0	supercont8.1:3934562-3936980	1673	14.7784	17.8977	14.4272	16.0458	13.8622	16.0992	18.4843	19.1097	20S-pre-rRNA D-site endonuclease NOB1 (1404 nt)	1673	1404	57.12
TCONS_00001919	XLOC_001812	NA	MGG_09256	TSS1863	=	MGG_09256T0	supercont8.1:3944221-3946412	2191	24.5498	9.94844	21.601	25.2672	26.7813	9.76274	9.55463	10.5279	hypothetical protein (2088 nt)	2191	2088	59.39
TCONS_00001921	XLOC_001814	NA	MGG_09263	TSS1865	=	MGG_09263T0	supercont8.1:3974005-3981533	5498	14.626	29.1712	12.7893	15.7549	15.3337	26.881	30.6696	29.963	hypothetical protein (3681 nt)	5498	3681	54.25
TCONS_00001923	XLOC_001816	NA	MGG_09264	TSS1867	=	MGG_09264T0	supercont8.1:3985106-3987208	2102	11.5683	8.61557	12.4462	10.3216	11.937	9.60655	8.50995	7.73019	urease accessory protein UreD (1020 nt)	2102	1020	64.61
TCONS_00001924	XLOC_001817	NA	MGG_09266	TSS1868	=	MGG_09266T0	supercont8.1:3989909-3991296	987	1.18108	2.29783	1.4545	0.998287	1.09044	2.44192	2.02493	2.42664	hypothetical protein (987 nt)	987	987	61.8
TCONS_00001925	XLOC_001818	NA	MGG_11746	TSS1869	=	MGG_11746T0	supercont8.1:3992913-3993592	679	3.0603	1.58186	4.29401	2.77762	2.10926	1.34093	2.0817	1.32295	hypothetical protein (588 nt)	679	588	62.59
TCONS_00001926	XLOC_001819	NA	MGG_11745	TSS1870	=	MGG_11745T0	supercont8.1:3994063-3996505	2168	7.76663	9.7127	7.6097	7.81276	7.87743	8.79798	9.89833	10.4418	hypothetical protein (1410 nt)	2168	1410	56.45
TCONS_00001927	XLOC_001820	NA	MGG_09268	TSS1871	=	MGG_09268T0	supercont8.1:3996764-3998348	1584	15.8637	26.5003	13.9598	16.7896	16.8417	25.0205	27.8192	26.6611	hypothetical protein (1050 nt)	1584	1050	62.48
TCONS_00001929	XLOC_001822	NA	MGG_14630	TSS1873	=	MGG_14630T0	supercont8.1:4034091-4034970	294	0.266795	0	0	0.800386	0	0	0	0	hypothetical protein (294 nt)	294	294	48.98
TCONS_00001930	XLOC_001823	NA	MGG_09271	TSS1874	=	MGG_09271T0	supercont8.1:4037109-4038793	1496	2.52368	0.588754	2.78724	2.43057	2.35323	0.568971	0.775088	0.422203	hypothetical protein (1197 nt)	1496	1197	58.9
TCONS_00001931	XLOC_001824	NA	MGG_11739	TSS1875	=	MGG_11739T0	supercont8.1:4055081-4056794	1647	104.4	34.7113	97.6603	106.819	108.721	33.0588	34.3156	36.7597	hypothetical protein (588 nt)	1647	588	63.1
TCONS_00001933	XLOC_001826	NA	MGG_16266	TSS1877	=	MGG_16266T0	supercont8.1:4060426-4061724	1127	1.76902	0.532444	1.84034	1.86624	1.60048	0.565614	0.393363	0.638354	hypothetical protein (360 nt)	1127	360	51.67
TCONS_00001934	XLOC_001827	NA	MGG_16267	TSS1878	=	MGG_16267T0	supercont8.1:4061941-4062443	502	2.61314	0.895931	1.68041	2.5767	3.58231	0.751366	0.89437	1.04206	hypothetical protein (201 nt)	502	201	54.73
TCONS_00001935	XLOC_001828	NA	MGG_11737	TSS1879	=	MGG_11737T0	supercont8.1:4077331-4079023	1491	936.441	231.665	896.585	977.384	935.355	216.24	236.076	242.679	hypothetical protein (717 nt)	1491	717	58.86
TCONS_00001936	XLOC_001829	NA	MGG_16270	TSS1880	=	MGG_16270T0	supercont8.1:4081300-4082201	291	0.273275	0	0	0	0.819825	0	0	0	hypothetical protein (291 nt)	291	291	54.3
TCONS_00001937	XLOC_001830	NA	MGG_16271	TSS1881	=	MGG_16271T0	supercont8.1:4083867-4084557	690	2.81528	0.898046	3.34921	2.87562	2.221	1.02972	0.925225	0.739193	hypothetical protein (474 nt)	690	474	53.59
TCONS_00001938	XLOC_001831	NA	MGG_16272	TSS1882	=	MGG_16272T0	supercont8.1:4084661-4085436	701	3.8175	0.599282	3.19461	4.68846	3.56942	0.712164	0.72411	0.361572	hypothetical protein (279 nt)	701	279	51.25
TCONS_00001941	XLOC_001832	NA	PXR1	TSS1884	=	MGG_16274T0	supercont8.1:4086614-4088997	1243	56.1532	35.8698	54.6573	57.0372	56.765	31.8734	38.1557	37.5804	hypothetical protein (1041 nt)	1243	1041	55.43
TCONS_00001942	XLOC_001833	NA	MGG_09281	TSS1885	=	MGG_09281T0	supercont8.1:4089601-4091288	516	67.3989	37.56	62.9752	67.7663	71.4552	34.6016	38.78	39.2984	COX17 protein (231 nt)	516	231	54.55
TCONS_00001943	XLOC_001834	NA	MGG_09282	TSS1886	=	MGG_09282T0	supercont8.1:4091520-4094707	3051	6.178	8.90996	6.48134	6.0613	5.99137	10.143	7.59323	8.99369	hypothetical protein (3051 nt)	3051	3051	52.21
TCONS_00001944	XLOC_001835	NA	MGG_09284	TSS1887	=	MGG_09284T0	supercont8.1:4095146-4098594	1497	22.942	14.6592	21.7635	22.1012	24.9613	14.2498	15.0674	14.6603	DNA-directed RNA polymerase I and III subunit RPAC1 (1122 nt)	1497	1122	58.91
TCONS_00001945	XLOC_001836	NA	MGG_11733	TSS1888	=	MGG_11733T0	supercont8.1:4101878-4103216	1338	0.622865	0.0890864	0.282135	0.968322	0.618139	0.0269385	0.0400986	0.200222	hypothetical protein (1338 nt)	1338	1338	62.41
TCONS_00001946	XLOC_001837	NA	MGG_11732	TSS1889	=	MGG_11732T0	supercont8.1:4104777-4106771	1886	8.17075	6.27974	9.55982	7.33943	7.61301	6.59457	5.93685	6.30782	hypothetical protein (1491 nt)	1886	1491	63.65
TCONS_00001947	XLOC_001838	NA	MGG_11731	TSS1890	=	MGG_11731T0	supercont8.1:4106832-4109301	2004	140.713	14.6578	161.183	129.39	131.566	16.4205	14.039	13.5139	sphingolipid long chain base-responsive protein LSP1 (933 nt)	2004	933	62.49
TCONS_00001948	XLOC_001839	NA	MGG_14629	TSS1891	=	MGG_14629T0	supercont8.1:4110016-4110283	267	138.92	108.543	147.922	142.007	126.832	113.505	106.126	106	hypothetical protein (267 nt)	267	267	61.42
TCONS_00001949	XLOC_001840	NA	MGG_09287	TSS1892	=	MGG_09287T0	supercont8.1:4111739-4113760	1863	131.562	98.3995	138.912	127.249	128.524	101.414	95.8866	97.8975	oligosaccharyltransferase alpha subunit (1455 nt)	1863	1455	54.43
TCONS_00001950	XLOC_001841	NA	MGG_09290	TSS1893	=	MGG_09290T0	supercont8.1:4117742-4119143	1305	10.4608	11.814	10.6597	10.1848	10.538	13.9024	11.4373	10.1024	arginine N-methyltransferase 2 (1305 nt)	1305	1305	61.99
TCONS_00001951	XLOC_001842	NA	MGG_09293	TSS1894	=	MGG_09293T0	supercont8.1:4123727-4129473	3847	15.2074	24.5124	16.8484	14.6531	14.1206	26.4752	23.9297	23.1324	DNA replication licensing factor mcm4 (3090 nt)	3847	3090	56.89
TCONS_00001952	XLOC_001843	NA	MGG_16276	TSS1895	=	MGG_16276T0	supercont8.1:4129634-4136282	1992	11.7139	9.78494	12.392	11.2175	11.5321	10.3626	9.38783	9.60439	hypothetical protein (1386 nt)	1992	1386	66.16
TCONS_00001953	XLOC_001843	NA	MGG_16277	TSS1896	=	MGG_16277T0	supercont8.1:4129634-4136282	3684	10.641	12.3326	10.7249	10.5121	10.6859	12.2565	12.274	12.4673	STE/STE20/YSK protein kinase (2586 nt)	3684	2586	52.51
TCONS_00001954	XLOC_001844	NA	MGG_09299	TSS1897	=	MGG_09299T0	supercont8.1:4138393-4143468	4087	9.51953	6.97082	9.47612	9.26108	9.82139	6.93773	7.24523	6.72949	peroxisome biosynthesis protein (3753 nt)	4087	3753	58.7
TCONS_00001955	XLOC_001845	NA	MGG_09301	TSS1898	=	MGG_09301T0	supercont8.1:4143717-4149087	1802	31.3786	22.0457	29.7712	32.5159	31.8487	21.9802	22.7918	21.365	hypothetical protein (1437 nt)	1802	1437	62.7
TCONS_00001956	XLOC_001846	NA	MGG_09303	TSS1899	=	MGG_09303T0	supercont8.1:4149263-4155088	3690	46.1684	57.8212	40.2682	48.8517	49.3854	48.9205	61.6322	62.9109	hypothetical protein (2256 nt)	3690	2256	53.41
TCONS_00001957	XLOC_001847	NA	MSH3	TSS1900	=	MGG_09306T0	supercont8.1:4164162-4167903	3741	4.08233	4.83012	3.51981	4.01242	4.71477	4.44994	5.39188	4.64853	DNA mismatch repair protein MSH3 (3456 nt)	3741	3456	58.39
TCONS_00001958	XLOC_001848	NA	MGG_11730	TSS1901	=	MGG_11730T0	supercont8.1:4173537-4174510	973	0.194944	0.133369	0.281373	0.101626	0.201832	0.164684	0.11779	0.117632	hypothetical protein (936 nt)	973	936	55.56
TCONS_00001959	XLOC_001849	NA	MGG_11728	TSS1902	=	MGG_11728T0	supercont8.1:4176580-4177726	971	22.8015	21.7648	24.5507	20.887	22.9669	24.7557	20.7255	19.8131	hypothetical protein (237 nt)	971	237	51.48
TCONS_00001960	XLOC_001850	NA	MGG_09309	TSS1903	=	MGG_09309T0	supercont8.1:4177798-4180370	2206	90.0427	122.586	98.0167	85.692	86.4193	131.289	118.679	117.79	ER-derived vesicles protein ERV29 (723 nt)	2206	723	56.43
TCONS_00001961	XLOC_001851	NA	MGG_09310	TSS1904	=	MGG_09310T0	supercont8.1:4181084-4183906	2712	11.2815	11.1856	14.0397	9.23313	10.5718	13.2424	10.4918	9.8227	dolichyl pyrophosphate Man9GlcNAc2 alpha-1,3-glucosyltransferase (1800 nt)	2712	1800	54.22
TCONS_00001962	XLOC_001852	NA	MGG_09312	TSS1905	=	MGG_09312T0	supercont8.1:4184026-4188915	2980	25.9321	26.183	27.3943	25.4026	24.9993	26.9408	26.0931	25.5151	hypothetical protein (1425 nt)	2980	1425	55.23
TCONS_00001963	XLOC_001853	NA	MGG_09314	TSS1906	=	MGG_09314T0	supercont8.1:4191876-4193512	1438	1.52856	3.32483	1.47728	1.97161	1.1368	3.30488	3.24494	3.42468	lipolytic enzyme (1290 nt)	1438	1290	64.57
TCONS_00001965	XLOC_001855	NA	MGG_14628	TSS1908	=	MGG_14628T0	supercont8.1:4194822-4196629	1807	15.9129	17.2528	15.8786	15.7416	16.1184	17.6013	16.465	17.6922	secretory lipase (1416 nt)	1807	1416	67.16
TCONS_00001971	XLOC_001861	NA	MGG_16286	TSS1914	=	MGG_16286T0	supercont8.1:4216524-4221451	2696	16.7529	12.2958	17.3763	16.6564	16.2259	12.3954	11.9154	12.5766	hypothetical protein (1728 nt)	2696	1728	57.7
TCONS_00001973	XLOC_001861	NA	MGG_16287	TSS1915	=	MGG_16287T0	supercont8.1:4216524-4221451	1876	48.2085	51.2104	45.6998	49.7537	49.172	49.393	52.5495	51.6886	hypothetical protein (1245 nt)	1876	1245	58.96
TCONS_00001974	XLOC_001862	NA	MGG_09885	TSS1916	=	MGG_09885T0	supercont8.1:4227012-4232150	2044	14.1265	13.581	13.4533	14.3222	14.604	12.4485	14.0578	14.2368	cleavage stimulation factor 64-kDa subunit (918 nt)	2044	918	65.25
TCONS_00001975	XLOC_001863	NA	MGG_09888	TSS1917	=	MGG_09888T0	supercont8.1:4233770-4236997	1864	24.377	28.8254	26.2606	23.8242	23.0461	29.3572	29.0591	28.0598	hypothetical protein (1149 nt)	1864	1149	62.05
TCONS_00001976	XLOC_001864	NA	MGG_09890	TSS1918	=	MGG_09890T0	supercont8.1:4238945-4239389	363	108.321	117.757	111.802	104.132	109.028	120.113	120.458	112.7	hypothetical protein (363 nt)	363	363	55.37
TCONS_00001977	XLOC_001865	NA	MGG_09891	TSS1919	=	MGG_09891T0	supercont8.1:4239866-4242825	2876	31.6907	29.0591	30.9018	32.6092	31.5611	30.1498	28.6783	28.349	double-strand-break repair protein rad21 (1878 nt)	2876	1878	54.85
TCONS_00001978	XLOC_001866	NA	MGG_09893	TSS1920	=	MGG_09893T0	supercont8.1:4247737-4251886	895	2.56744	4.63986	4.32791	1.35545	2.01897	5.35093	4.45072	4.11792	molybdopterin synthase sulfur carrier subunit (303 nt)	895	303	52.48
TCONS_00001979	XLOC_001867	NA	MGG_09894	TSS1921	=	MGG_09894T0	supercont8.1:4252173-4253090	618	830.527	539.926	837.658	830.876	823.046	536.412	537.987	545.38	40S ribosomal protein S28 (207 nt)	618	207	59.9
TCONS_00001980	XLOC_001868	NA	MGG_16288	TSS1922	=	MGG_16288T0	supercont8.1:4259824-4260559	360	0.159922	0.210881	0	0.479765	0	0.632643	0	0	hypothetical protein (360 nt)	360	360	48.06
TCONS_00001981	XLOC_001869	NA	MGG_09900	TSS1923	=	MGG_09900T0	supercont8.1:4269693-4272584	1263	50.3765	98.7993	42.1751	55.074	53.8803	83.4791	106.939	105.98	hypothetical protein (600 nt)	1263	600	62
TCONS_00001982	XLOC_001870	NA	MGG_09901	TSS1924	=	MGG_09901T0	supercont8.1:4274325-4277264	2767	56.4043	33.5882	55.3063	58.3631	55.5434	33.3403	34.1715	33.2528	NAD dependent epimerase/dehydratase (1131 nt)	2767	1131	55.35
TCONS_00001983	XLOC_001871	NA	MGG_09902	TSS1925	=	MGG_09902T0	supercont8.1:4281229-4282411	867	101.167	143.435	116.841	93.1883	93.4724	160.168	135.194	134.944	F-actin-capping protein subunit beta (867 nt)	867	867	62.4
TCONS_00001984	XLOC_001872	NA	MGG_09903	TSS1926	=	MGG_09903T0	supercont8.1:4283359-4284920	1326	60.7076	68.4289	57.5081	62.7002	61.9146	64.0333	71.9703	69.2831	hypothetical protein (1326 nt)	1326	1326	53.92
TCONS_00001985	XLOC_001873	NA	ATG22	TSS1927	=	MGG_09904T0	supercont8.1:4285857-4289275	3317	22.0205	23.943	25.9175	20.5589	19.5852	26.6719	22.0728	23.0841	autophagy-like protein 22 (2040 nt)	3317	2040	54.75
TCONS_00001986	XLOC_001874	NA	MGG_11724	TSS1928	=	MGG_11724T0	supercont8.1:4289846-4292189	2225	13.4637	19.8981	14.3524	13.2397	12.799	20.1558	19.3087	20.2297	hypothetical protein (1089 nt)	2225	1089	62.26
TCONS_00001987	XLOC_001875	NA	MGG_11723	TSS1929	=	MGG_11723T0	supercont8.1:4292480-4293156	513	78.7654	60.9572	73.6441	87.311	75.3412	58.6168	57.2786	66.9764	cystathionine beta-synthase (513 nt)	513	513	62.18
TCONS_00001989	XLOC_001877	NA	MGG_09908	TSS1931	=	MGG_09908T0	supercont8.1:4297289-4302074	814	79.441	62.9302	82.6363	78.816	76.8705	63.5033	64.5346	60.7527	hypothetical protein (252 nt)	814	252	53.17
TCONS_00001991	XLOC_001879	NA	MGG_09912	TSS1933	=	MGG_09912T0	supercont8.1:4314888-4317730	2338	154.633	198.151	158.601	156.806	148.492	204.319	195.188	194.945	CAMK/CAMK1 protein kinase (1221 nt)	2338	1221	54.55
TCONS_00001992	XLOC_001880	NA	MGG_09916	TSS1934	=	MGG_09916T0	supercont8.1:4328195-4329917	1330	289.144	213.98	303.568	279.659	284.205	225.079	212.041	204.818	ATP synthase subunit gamma (909 nt)	1330	909	59.41
TCONS_00001993	XLOC_001881	NA	MGG_09918	TSS1935	=	MGG_09918T0	supercont8.1:4334790-4336938	1954	11.3833	13.5755	11.3092	11.6396	11.2011	12.7026	14.5943	13.4294	hypothetical protein (1074 nt)	1954	1074	63.69
TCONS_00001995	XLOC_001883	NA	MGG_09920	TSS1937	=	MGG_09920T0	supercont8.1:4343802-4348226	3248	3.44391	5.32536	3.46791	3.57297	3.29085	5.23046	5.55655	5.18906	cytochrome P450 52A5 (1608 nt)	3248	1608	58.4
TCONS_00001996	XLOC_001884	NA	MGG_09922	TSS1938	=	MGG_09922T0	supercont8.1:4348393-4351195	2526	105.927	17.3499	114.439	103.769	99.574	17.6932	17.3078	17.0486	beta-hexosaminidase subunit beta (1743 nt)	2526	1743	58.98
TCONS_00001997	XLOC_001885	NA	RGR1	TSS1939	=	MGG_09925T0	supercont8.1:4356125-4363417	4335	9.48338	9.14863	9.06329	9.66091	9.72595	8.92939	9.40289	9.1136	mediator-RNA polymerase II transcription subunit 14 (3327 nt)	4335	3327	54.25
TCONS_00001998	XLOC_001886	NA	MGG_09926	TSS1940	=	MGG_09926T0	supercont8.1:4364014-4366782	2122	151.267	229.432	155.784	145.382	152.633	233.049	227.694	227.552	glucose-6-phosphate 1-dehydrogenase (1524 nt)	2122	1524	54.07
TCONS_00001999	XLOC_001887	NA	VMA21	TSS1941	=	MGG_09929T0	supercont8.1:4372998-4377898	999	28.8281	29.0616	28.5746	28.3214	29.5883	29.4341	28.3821	29.3684	vacuolar ATPase assembly integral membrane protein VMA21 (336 nt)	999	336	54.46
TCONS_00002000	XLOC_001888	NA	MGG_09931	TSS1942	=	MGG_09931T0	supercont8.1:4382203-4387947	4878	21.3458	15.8571	25.8216	19.4106	18.8053	18.0514	14.7065	14.8136	lipid A export ATP-binding/permease msbA (4110 nt)	4878	4110	53.09
TCONS_00002001	XLOC_001889	NA	MGG_09932	TSS1943	=	MGG_09932T0	supercont8.1:4389624-4391964	2199	73.0671	32.2601	66.0273	75.8144	77.3597	27.6944	35.3208	33.7652	hypothetical protein (2199 nt)	2199	2199	58.25
TCONS_00002002	XLOC_001890	NA	MGG_11719	TSS1944	=	MGG_11719T0	supercont8.1:4396618-4397862	1120	1.30767	2.56987	1.36663	1.45301	1.10336	2.75872	2.47711	2.47377	hypothetical protein (441 nt)	1120	441	55.33
TCONS_00002003	XLOC_001891	NA	MGG_09935	TSS1945	=	MGG_09935T0	supercont8.1:4398114-4402758	4038	20.6149	13.7705	22.8348	20.3627	18.6474	14.6988	13.9235	12.6893	serine/threonine-protein phosphatase 2A activator 2 (1350 nt)	4038	1350	56
TCONS_00002004	XLOC_001892	NA	MGG_16300	TSS1946	=	MGG_16300T0	supercont8.1:4410308-4414743	2163	3.06289	1.90693	2.58525	3.17321	3.4302	1.60021	2.23627	1.8843	hypothetical protein (1515 nt)	2163	1515	60.66
TCONS_00002005	XLOC_001892	NA	MGG_16301	TSS1947	=	MGG_16301T0	supercont8.1:4410308-4414743	2092	126.2	49.8125	125.296	127.263	126.041	50.7622	49.033	49.6422	hypothetical protein (975 nt)	2092	975	59.59
TCONS_00002006	XLOC_001893	NA	MGG_14548	TSS1948	=	MGG_14548T0	supercont8.1:4430622-4432823	1784	0.105005	0.0609077	0.166116	0.0994986	0.0494011	0.0962564	0.0288483	0.0576185	integral membrane protein (1698 nt)	1784	1698	56.95
TCONS_00002007	XLOC_001894	NA	MGG_11716	TSS1949	=	MGG_11716T0	supercont8.1:4433237-4434691	1236	5.2077	5.90908	5.25638	5.01234	5.35436	5.01295	6.07547	6.63882	histone acetyltransferase GCN5 (1236 nt)	1236	1236	49.35
TCONS_00002008	XLOC_001895	NA	MGG_09947	TSS1950	=	MGG_09947T0	supercont8.1:4443785-4449435	5437	19.1606	16.537	19.1368	19.0595	19.2854	16.6124	16.7685	16.2303	tricalbin-1 (4482 nt)	5437	4482	52.72
TCONS_00002009	XLOC_001896	NA	MGG_09949	TSS1951	=	MGG_09949T0	supercont8.1:4450922-4455039	2472	88.6875	155.068	81.3635	92.7605	91.9387	143.777	161.356	160.071	oxysterol-binding protein (1632 nt)	2472	1632	53.37
TCONS_00002010	XLOC_001897	NA	MGG_16302	TSS1952	=	MGG_16302T0	supercont8.1:4456173-4458096	1145	0.587675	0.745305	0.766697	0.665769	0.330558	0.838143	0.530633	0.867138	hypothetical protein (294 nt)	1145	294	47.28
TCONS_00002011	XLOC_001898	NA	MGG_11713	TSS1953	=	MGG_11713T0	supercont8.1:4462997-4467495	1979	3.0347	5.91986	3.84912	2.70295	2.55203	7.38493	5.49899	4.87567	hypothetical protein (1701 nt)	1979	1701	53.73
TCONS_00002013	XLOC_001900	NA	MGG_11712	TSS1955	=	MGG_11712T0	supercont8.1:4474514-4479090	2936	19.1067	20.5218	18.8734	18.6873	19.7592	20.1784	20.6073	20.7798	hypothetical protein (2058 nt)	2936	2058	59.57
TCONS_00002014	XLOC_001901	NA	MGG_09952	TSS1956	=	MGG_09952T0	supercont8.1:4481489-4482932	822	719.727	598.011	735.566	717.819	705.796	568.907	613.813	611.312	GTP-binding nuclear protein GSP1/Ran (651 nt)	822	651	56.84
TCONS_00002015	XLOC_001902	NA	MGG_09953	TSS1957	=	MGG_09953T0	supercont8.1:4483307-4484964	1410	42.0386	48.6543	40.8418	44.3752	40.8989	45.9876	49.7952	50.18	26S proteasome non-ATPase regulatory subunit 9 (699 nt)	1410	699	53.65
TCONS_00002016	XLOC_001903	NA	MGG_09956	TSS1958	=	MGG_09956T0	supercont8.1:4494858-4498568	3458	98.9954	76.6295	109.504	95.7359	91.7458	85.1183	71.6339	73.1362	PRO41 protein (435 nt)	3458	435	56.32
TCONS_00002017	XLOC_001904	NA	MGG_09957	TSS1959	=	MGG_09957T0	supercont8.1:4500925-4501496	309	1.16953	0.574004	0.73867	1.38972	1.3802	1.32208	0.39993	0	hypothetical protein (309 nt)	309	309	54.37
TCONS_00002018	XLOC_001905	NA	MGG_09958	TSS1960	=	MGG_09958T0	supercont8.1:4502565-4503579	753	0.188619	5.26123	0	0.425135	0.140723	5.3646	5.82829	4.59081	hypothetical protein (645 nt)	753	645	53.33
TCONS_00002019	XLOC_001906	NA	MGG_09959	TSS1961	=	MGG_09959T0	supercont8.1:4503938-4505417	1382	21.0509	22.0262	21.0069	21.3791	20.7666	20.9709	22.2025	22.9052	hypothetical protein (897 nt)	1382	897	54.85
TCONS_00002020	XLOC_001907	NA	MGG_09961	TSS1962	=	MGG_09961T0	supercont8.1:4510826-4514451	3551	12.2612	18.0458	12.0274	11.6353	13.1209	17.2468	19.0313	17.8593	WD-40 repeat family protein (2637 nt)	3551	2637	57.3
TCONS_00002021	XLOC_001908	NA	CHS4	TSS1963	=	MGG_09962T0	supercont8.1:4515404-4521063	5286	3.99747	5.09004	4.88304	4.15813	2.95125	5.36676	5.95213	3.95125	chitin synthase 4 (3690 nt)	5286	3690	54.53
TCONS_00002022	XLOC_001908	NA	CHS4	TSS1963	=	MGG_09962T1	supercont8.1:4515404-4521063	5024	31.4017	43.7057	32.8323	30.5301	30.8427	47.3819	40.5081	43.2271	chitin synthase 4, variant (3690 nt)	5024	3690	54.53
TCONS_00002024	XLOC_001910	NA	MGG_10648	TSS1965	=	MGG_10648T0	supercont8.1:4529770-4533285	2303	1.49634	1.05991	1.61102	1.53747	1.34052	0.832148	1.47886	0.868737	hypothetical protein (1617 nt)	2303	1617	50.22
TCONS_00002025	XLOC_001911	NA	MGG_11710	TSS1966	=	MGG_11710T0	supercont8.1:4538235-4539371	1032	51.2579	63.5219	50.9936	50.1582	52.6218	64.4597	62.4663	63.6397	hypothetical protein (657 nt)	1032	657	63.32
TCONS_00002026	XLOC_001912	NA	UTP25	TSS1967	=	MGG_10652T0	supercont8.1:4539502-4543342	2551	21.166	16.2691	21.2034	21.3052	20.9895	15.2819	17.1047	16.4208	digestive organ expansion factor (2169 nt)	2551	2169	52.05
TCONS_00002027	XLOC_001913	NA	MGG_11709	TSS1968	=	MGG_11709T0	supercont8.1:4543444-4549541	3750	36.4441	40.3216	31.6089	38.5773	39.1461	36.3504	42.4584	42.1559	hypothetical protein (2508 nt)	3750	2508	55.26
TCONS_00002028	XLOC_001914	NA	MGG_11708	TSS1969	=	MGG_11708T0	supercont8.1:4551189-4551852	663	33.6189	34.4381	27.1021	37.0063	36.7484	27.0377	39.8262	36.4505	hypothetical protein (663 nt)	663	663	54.3
TCONS_00002029	XLOC_001915	NA	MGG_10656	TSS1970	=	MGG_10656T0	supercont8.1:4558076-4559906	1137	5.57366	3.86338	5.5908	6.54639	4.58378	3.61706	4.03785	3.93524	dynamin family protein (1137 nt)	1137	1137	56.99
TCONS_00002030	XLOC_001916	NA	MGG_10658	TSS1971	=	MGG_10658T0	supercont8.1:4565082-4566917	1784	0.0165831	0.0741906	0	0.0497493	0	0.049638	0.0576967	0.115237	hypothetical protein (1662 nt)	1784	1662	56.74
TCONS_00002031	XLOC_001917	NA	MGG_10659	TSS1972	=	MGG_10659T0	supercont8.1:4567430-4569920	2490	21.2823	197.177	18.6816	22.1471	23.0181	181.093	206.476	203.961	hypothetical protein (2490 nt)	2490	2490	58.92
TCONS_00002032	XLOC_001918	NA	MGG_10660	TSS1973	=	MGG_10660T0	supercont8.1:4572931-4574735	1031	1546.36	3163.99	1471.94	1577	1590.12	3043.75	3183.72	3264.5	hypothetical protein (981 nt)	1031	981	54.74
TCONS_00002033	XLOC_001919	NA	MGG_10662	TSS1974	=	MGG_10662T0	supercont8.1:4575854-4580557	3317	10.7159	22.9388	10.8261	11.0137	10.308	21.3109	23.468	24.0374	alpha-glucosidase (2898 nt)	3317	2898	57.9
TCONS_00002034	XLOC_001920	NA	MGG_10663	TSS1975	=	MGG_10663T0	supercont8.1:4581077-4582865	1710	0.439423	1.60522	0.32868	0.730516	0.259073	1.762	1.36156	1.69209	cAMP-regulated D2 protein (1710 nt)	1710	1710	58.3
TCONS_00002035	XLOC_001921	NA	MGG_10664	TSS1976	=	MGG_10664T0	supercont8.1:4583559-4587442	3883	6.00897	8.11085	4.63594	6.66562	6.72534	6.70302	8.77727	8.85225	hypothetical protein (3003 nt)	3883	3003	59.91
TCONS_00002036	XLOC_001922	NA	MGG_10665	TSS1977	=	MGG_10665T0	supercont8.1:4588411-4589836	1199	91.0777	60.0111	103.417	86.5397	83.2761	66.9522	56.3735	56.7077	hypothetical protein (597 nt)	1199	597	57.45
TCONS_00002037	XLOC_001923	NA	MGG_10666	TSS1978	=	MGG_10666T0	supercont8.1:4590278-4592274	1401	6.70213	11.6202	7.3045	6.22743	6.57444	13.6292	11.3255	9.90591	meiosis-specific topoisomerase Spo11 (1401 nt)	1401	1401	50.54
TCONS_00002038	XLOC_001924	NA	MGG_15479	TSS1979	=	MGG_15479T0	supercont8.1:4595881-4601211	2608	131.566	32.9885	157.247	118.817	118.635	36.7648	30.9316	31.2691	hypothetical protein (912 nt)	2608	912	56.36
TCONS_00002039	XLOC_001925	NA	MGG_15480	TSS1980	=	MGG_15480T0	supercont8.1:4595881-4601211	1883	37.2399	26.0971	39.4724	37.1839	35.0635	26.6749	24.903	26.7135	hypothetical protein (1539 nt)	1883	1539	53.09
TCONS_00002043	XLOC_001929	NA	MGG_10506	TSS1984	=	MGG_10506T0	supercont8.1:4638955-4640978	1782	10.3707	10.276	10.7108	10.2613	10.14	9.81481	9.96522	11.0479	glyoxalase (984 nt)	1782	984	54.88
TCONS_00002044	XLOC_001930	NA	MGG_10510	TSS1985	=	MGG_10510T0	supercont8.1:4650913-4653004	1596	6.50575	17.7504	7.2621	5.75549	6.49966	17.8425	17.2095	18.1991	ribonuclease T2 (975 nt) Note(s): Short internal exon	1596	975	57.85
TCONS_00002046	XLOC_001932	NA	MGG_10514	TSS1987	=	MGG_10514T0	supercont8.1:4678763-4680726	1963	4.82361	14.7328	3.95612	5.23127	5.28346	13.7007	15.4535	15.0442	WSC domain-containing protein (1155 nt)	1963	1155	62.16
TCONS_00002047	XLOC_001933	NA	MGG_15144	TSS1988	=	MGG_15144T0	supercont8.1:4694709-4695527	606	0.865979	0	1.06789	0.192428	1.33762	0	0	0	hypothetical protein (606 nt)	606	606	51.49
TCONS_00002049	XLOC_001935	NA	MGG_10522	TSS1990	=	MGG_10522T0	supercont8.1:4703212-4706106	1994	26.1992	16.6198	27.2371	25.4859	25.8747	17.6715	16.3595	15.8284	hypothetical protein (1203 nt)	1994	1203	60.18
TCONS_00002050	XLOC_001936	NA	MGG_10523	TSS1991	=	MGG_10523T0	supercont8.1:4706321-4709185	2792	9.81795	13.6872	9.28183	10.3793	9.79276	13.8581	13.2934	13.91	hypothetical protein (1665 nt)	2792	1665	58.08
TCONS_00002051	XLOC_001937	NA	MGG_16318	TSS1992	=	MGG_16318T0	supercont8.1:4709821-4710807	881	2.94879	4.02347	3.33159	2.99676	2.51801	4.99601	3.4061	3.66831	hypothetical protein (399 nt)	881	399	50.63
TCONS_00002052	XLOC_001938	NA	MGG_10525	TSS1993	=	MGG_10525T0	supercont8.1:4712089-4714681	2592	229.069	120.793	198.291	244.1	244.814	101.632	130.041	130.705	hypothetical protein (2592 nt)	2592	2592	53.24
TCONS_00002053	XLOC_001939	NA	MGG_15146	TSS1994	=	MGG_15146T0	supercont8.1:4733024-4734824	1800	69.7972	111.682	70.0618	68.3635	70.9664	112.595	110.616	111.836	hypothetical protein (1086 nt)	1800	1086	57.92
TCONS_00002054	XLOC_001940	NA	MGG_10537	TSS1995	=	MGG_10537T0	supercont8.1:4734925-4737132	2131	1.82069	0.810319	1.71932	1.79658	1.94618	0.940117	0.781421	0.70942	hypothetical protein (1269 nt)	2131	1269	50.59
TCONS_00002055	XLOC_001941	NA	MGG_10528	TSS1996	=	MGG_10528T0	supercont8.1:4743457-4747984	4147	20.7278	22.8946	18.6847	20.301	23.1975	21.066	24.225	23.3926	zinc binuclear cluster-type protein (3096 nt)	4147	3096	55.1
TCONS_00002057	XLOC_001942	NA	MGG_10532	TSS1998	=	MGG_10532T0	supercont8.1:4758389-4759863	1387	16.3825	2.27541	13.1379	16.7131	19.2964	1.67729	2.53778	2.61115	necrosis and ethylene inducing peptide (744 nt)	1387	744	66.4
TCONS_00002058	XLOC_001943	NA	MGG_14340	TSS1999	=	MGG_14340T0	supercont8.1:4763438-4764473	1035	5.05396	1.29414	5.02821	5.64735	4.48631	1.593	0.981928	1.30748	hypothetical protein (288 nt)	1035	288	72.22
TCONS_00002060	XLOC_001945	NA	MGG_10533	TSS2001	=	MGG_10533T0	supercont8.1:4765829-4767912	1594	32.1014	122.466	31.7155	32.6611	31.9275	110.734	126.667	129.997	agmatinase 1 (1272 nt)	1594	1272	62.89
TCONS_00002063	XLOC_001948	NA	MGG_10547	TSS2004	=	MGG_10547T0	supercont8.1:4812258-4815171	2776	4.0299	24.9965	4.55479	3.30765	4.22726	27.0264	23.3766	24.5866	ankyrin repeat domain-containing protein (1806 nt)	2776	1806	51.16
TCONS_00002064	XLOC_001949	NA	MGG_10549	TSS2005	=	MGG_10549T0	supercont8.1:4817661-4817994	333	0.184137	1.07143	0.55241	0	0	1.56186	0.661472	0.990954	hypothetical protein (333 nt)	333	333	70.87
TCONS_00002065	XLOC_001950	NA	MGG_16326	TSS2006	=	MGG_16326T0	supercont8.1:4827721-4829180	987	0	0.0417201	0	0	0	0.12516	0	0	hypothetical protein (987 nt)	987	987	52.79
TCONS_00002066	XLOC_001951	NA	MGG_05335	TSS2007	=	MGG_05335T0	supercont8.1:4855985-4859705	879	10.472	16.2746	11.6063	10.2793	9.53053	15.4036	17.0228	16.3974	hypothetical protein (348 nt)	879	348	63.79
TCONS_00002068	XLOC_001951	NA	MGG_05336	TSS2008	=	MGG_05336T0	supercont8.1:4855985-4859705	2419	20.1523	36.7391	21.8017	20.7983	17.8567	39.7135	35.1914	35.3122	hypothetical protein (1563 nt)	2419	1563	56.56
TCONS_00002069	XLOC_001952	NA	MGG_05337	TSS2009	=	MGG_05337T0	supercont8.1:4860453-4862561	2034	0.713635	1.25002	0.94123	0.644779	0.554897	1.234	1.29626	1.21982	glucooligosaccharide oxidase (1494 nt)	2034	1494	61.91
TCONS_00002070	XLOC_001953	NA	MGG_05339	TSS2010	=	MGG_05339T0	supercont8.1:4865846-4867095	891	11.99	15.2376	10.2692	13.2916	12.4091	14.2679	16.0619	15.383	hypothetical protein (891 nt)	891	891	59.48
TCONS_00002071	XLOC_001954	NA	MGG_05340	TSS2011	=	MGG_05340T0	supercont8.1:4867366-4871350	2549	4.61873	13.7723	4.88565	4.86911	4.10143	13.6796	14.1784	13.459	hypothetical protein (2082 nt)	2549	2082	57.97
TCONS_00002072	XLOC_001955	NA	MGG_05344	TSS2012	=	MGG_05344T0	supercont8.1:4886159-4887074	839	2535.3	752.862	2375.46	2716.75	2513.68	674.838	799.514	784.234	SnodProt1 (414 nt)	839	414	64.25
TCONS_00002073	XLOC_001956	NA	MGG_05345	TSS2013	=	MGG_05345T0	supercont8.1:4890390-4892749	2250	68.7701	19.4016	75.8723	64.6622	65.7757	21.2417	18.8062	18.1569	dihydroxy-acid dehydratase (1788 nt)	2250	1788	61.69
TCONS_00002075	XLOC_001958	NA	MGG_05348	TSS2015	=	MGG_05348T0	supercont8.1:4897197-4899939	1496	8.53373	2.42172	9.97629	8.20319	7.42173	2.82892	2.29003	2.1462	isochorismatase (921 nt)	1496	921	69.92
TCONS_00002076	XLOC_001959	NA	MGG_05349	TSS2016	=	MGG_05349T0	supercont8.1:4900021-4901580	1456	7.76438	17.4353	6.30181	8.33807	8.65327	17.3263	17.4835	17.4962	hypothetical protein (972 nt)	1456	972	62.86
TCONS_00002077	XLOC_001960	NA	MGG_05351	TSS2017	=	MGG_05351T0	supercont8.1:4909663-4911031	1266	0	0.431446	0	0	0	0.610059	0.385134	0.299144	hypothetical protein (1266 nt)	1266	1266	65.4
TCONS_00002078	XLOC_001961	NA	MGG_05352	TSS2018	=	MGG_05352T0	supercont8.1:4912923-4914503	1215	0	0.167216	0	0	0	0.0525809	0.269586	0.179481	hypothetical protein (1215 nt)	1215	1215	62.14
TCONS_00002080	XLOC_001963	NA	MGG_16333	TSS2020	=	MGG_16333T0	supercont8.1:4923269-4930109	2417	20.3185	8.64681	24.3034	17.8232	18.8288	9.73385	8.45931	7.74728	hypothetical protein (1749 nt)	2417	1749	71.53
TCONS_00002081	XLOC_001963	NA	MGG_16334	TSS2021	=	MGG_16334T0	supercont8.1:4923269-4930109	4463	42.0189	35.6299	39.6769	44.6889	41.6909	32.6203	36.2581	38.0112	hypothetical protein (3288 nt)	4463	3288	58.36
TCONS_00002082	XLOC_001964	NA	MGG_16335	TSS2022	=	MGG_16335T0	supercont8.1:4932205-4932596	246	0.507961	0.843267	0	0	1.52388	0.812664	0.859069	0.858066	hypothetical protein (246 nt)	246	246	48.37
TCONS_00002083	XLOC_001965	NA	MGG_05357	TSS2023	=	MGG_05357T0	supercont8.1:4934215-4936622	2160	5.82998	8.53176	6.7076	5.22972	5.55263	9.76451	8.21219	7.61859	hypothetical protein (1092 nt)	2160	1092	59.89
TCONS_00002084	XLOC_001966	NA	MGG_05359	TSS2024	=	MGG_05359T0	supercont8.1:4936745-4941388	3491	69.5582	129.604	66.4536	71.8264	70.3946	123.02	132.736	133.056	SAM binding domain-containing protein containing protein (2442 nt)	3491	2442	59.05
TCONS_00002085	XLOC_001967	NA	MGG_16336	TSS2025	=	MGG_16336T0	supercont8.1:4941848-4942417	375	3.42812	22.2115	4.58918	2.63837	3.05683	18.4326	24.6238	23.578	hypothetical protein (375 nt)	375	375	52
TCONS_00002087	XLOC_001969	NA	MGG_13020	TSS2027	=	MGG_13020T0	supercont8.1:4945905-4948275	2283	34.1062	32.8579	29.8893	35.7006	36.7288	27.4844	35.1958	35.8935	glucose-repressible alcohol dehydrogenase transcriptional effector (2283 nt)	2283	2283	55.19
TCONS_00002089	XLOC_001971	NA	MGG_13021	TSS2029	=	MGG_13021T0	supercont8.1:4949893-4952284	2391	6.21599	1.67975	6.63077	6.11939	5.89782	1.65955	1.67013	1.70957	hypothetical protein (2391 nt)	2391	2391	53.95
TCONS_00002090	XLOC_001972	NA	MGG_16339	TSS2030	=	MGG_16339T0	supercont8.1:4957966-4958373	407	0.869249	4.33525	0	1.86637	0.74138	3.5234	4.52874	4.95361	hypothetical protein (273 nt)	407	273	65.57
TCONS_00002091	XLOC_001973	NA	MGG_05364	TSS2031	=	MGG_05364T0	supercont8.1:4959441-4960933	1125	71.9668	121.154	63.0912	74.47	78.3392	100.749	133.341	129.372	endoglucanase-4 (1125 nt)	1125	1125	65.33
TCONS_00002092	XLOC_001974	NA	MGG_16340	TSS2032	=	MGG_16340T0	supercont8.1:4960991-4963878	783	0.0448261	0.0497946	0	0.134478	0	0.0715831	0	0.0778007	hypothetical protein (783 nt)	783	783	53.38
TCONS_00002093	XLOC_001975	NA	MGG_13023	TSS2033	=	MGG_13023T0	supercont8.1:4968325-4969877	1552	10.4028	25.4438	9.50562	9.61229	12.0904	22.4914	27.2251	26.6148	replication factor C subunit 3 (1215 nt)	1552	1215	65.1
TCONS_00002095	XLOC_001977	NA	MGG_15179	TSS2035	=	MGG_15179T0	supercont8.1:4984241-4990016	1119	4.90646	2.67904	4.4838	5.64731	4.58826	2.43596	3.07506	2.52609	hypothetical protein (339 nt)	1119	339	56.93
TCONS_00002096	XLOC_001978	NA	MGG_05376	TSS2036	=	MGG_05376T0	supercont8.1:4996466-5001050	4280	44.8688	51.1842	44.2887	45.4333	44.8845	49.5396	52.3167	51.6963	AGC/NDR protein kinase (1959 nt)	4280	1959	56.1
TCONS_00002097	XLOC_001979	NA	MGG_13029	TSS2037	=	MGG_13029T0	supercont8.1:5001862-5004792	1205	14.3127	14.0931	14.4647	14.6376	13.8357	16.9311	12.932	12.4161	hypothetical protein (774 nt)	1205	774	62.92
TCONS_00002098	XLOC_001980	NA	MGG_16341	TSS2038	=	MGG_16341T0	supercont8.1:5005180-5009376	3793	126.881	81.225	127.692	125.355	127.597	84.8097	79.7987	79.0666	hypothetical protein (1077 nt)	3793	1077	55.52
TCONS_00002099	XLOC_001981	NA	MGG_05378	TSS2039	=	MGG_05378T0	supercont8.1:5017113-5019500	2213	22.734	23.6249	22.4509	23.2681	22.4829	23.5857	23.967	23.322	chromatin structure-remodeling complex protein RSC7 (1689 nt)	2213	1689	59.03
TCONS_00002100	XLOC_001982	NA	MGG_05381	TSS2040	=	MGG_05381T0	supercont8.1:5025474-5027025	1443	5.19901	6.88826	4.87041	4.75091	5.97572	6.79144	6.97807	6.89528	beta-1,6-galactanase (1443 nt)	1443	1443	64.93
TCONS_00002101	XLOC_001983	NA	MGG_13031	TSS2041	=	MGG_13031T0	supercont8.1:5028013-5030618	2451	51.3393	7.5959	43.6458	55.6068	54.7652	6.07442	8.33186	8.38144	hypothetical protein (2451 nt)	2451	2451	58.79
TCONS_00002102	XLOC_001984	NA	MGG_13032	TSS2042	=	MGG_13032T0	supercont8.1:5031228-5033205	1622	32.8427	26.1924	32.3382	33.1834	33.0063	25.7398	26.9824	25.8552	formyl-coenzyme A transferase (1347 nt)	1622	1347	62.21
TCONS_00002103	XLOC_001985	NA	MGG_13033	TSS2043	=	MGG_13033T0	supercont8.1:5033559-5035361	1720	57.5235	47.7791	63.008	54.9477	54.6147	52.0212	45.7791	45.537	hypothetical protein (447 nt)	1720	447	62.42
TCONS_00002104	XLOC_001986	NA	MGG_05383	TSS2044	=	MGG_05383T0	supercont8.1:5035916-5037271	1270	7.05487	3.53947	7.4642	6.32461	7.37581	3.37578	3.49595	3.74669	HHE domain-containing protein (720 nt)	1270	720	57.64
TCONS_00002105	XLOC_001987	NA	MGG_05384	TSS2045	=	MGG_05384T0	supercont8.1:5038561-5043652	4907	30.8099	12.5931	30.8852	30.2786	31.2659	12.9627	12.4849	12.3318	ankyrin repeat domain-containing protein 29 (4224 nt)	4907	4224	51.21
TCONS_00002106	XLOC_001988	NA	MGG_13035	TSS2046	=	MGG_13035T0	supercont8.1:5044298-5045358	993	145.026	251.425	144.515	145.248	145.316	251.671	249.836	252.768	hypothetical protein (654 nt)	993	654	64.37
TCONS_00002107	XLOC_001989	NA	MGG_13036	TSS2047	=	MGG_13036T0	supercont8.1:5045816-5046815	999	0.680774	1.25632	0.962661	0.786706	0.292954	1.03473	1.70977	1.02448	hypothetical protein (999 nt)	999	999	56.26
TCONS_00002108	XLOC_001990	NA	MGG_16343	TSS2048	=	MGG_16343T0	supercont8.1:5047729-5048489	321	0	0.249345	0	0	0	0.385976	0.362059	0	hypothetical protein (321 nt)	321	321	47.98
TCONS_00002111	XLOC_001993	NA	MGG_05390	TSS2051	=	MGG_05390T0	supercont8.1:5064227-5066209	1497	0.0787366	0.161083	0.115199	0.0607177	0.0602929	0.201806	0.140817	0.140626	isotrichodermin C-15 hydroxylase (1497 nt)	1497	1497	58.65
TCONS_00002113	XLOC_001995	NA	MGG_05393	TSS2053	=	MGG_05393T0	supercont8.1:5075532-5076686	1154	0	0.0441962	0	0	0	0.0371436	0	0.0954451	hypothetical protein (771 nt)	1154	771	60.83
TCONS_00002115	XLOC_001997	NA	MGG_05397	TSS2055	=	MGG_05397T0	supercont8.1:5081650-5084093	2153	14.9689	3.18522	16.5105	13.2422	15.154	2.95664	3.95687	2.64213	CMGC protein kinase (1446 nt)	2153	1446	51.11
TCONS_00002116	XLOC_001998	NA	MGG_05403	TSS2056	=	MGG_05403T0	supercont8.1:5105522-5105918	315	1.07698	0	1.25985	0.660046	1.31104	0	0	0	hypothetical protein (315 nt)	315	315	56.83
TCONS_00002118	XLOC_002000	NA	MGG_05405	TSS2058	=	MGG_05405T0	supercont8.1:5110391-5112009	1413	0.638997	0.476075	1.01012	0.64906	0.257808	0.224852	0.602093	0.601279	hypothetical protein (1413 nt)	1413	1413	65.04
TCONS_00002119	XLOC_002001	NA	MGG_05407	TSS2059	=	MGG_05407T0	supercont8.1:5117428-5117854	426	0	0.131806	0	0	0	0	0	0.395417	hypothetical protein (426 nt)	426	426	53.99
TCONS_00002123	XLOC_002005	NA	MGG_05419	TSS2063	=	MGG_05419T0	supercont8.1:5152659-5156009	2902	0.50421	1.54145	0.319082	0.671617	0.521932	1.03641	1.64286	1.94508	hypothetical protein (2544 nt)	2902	2544	59.59
TCONS_00002124	XLOC_002006	NA	MGG_05421	TSS2064	=	MGG_05421T0	supercont8.1:5168592-5169866	1146	153.911	642.976	162.912	150.638	148.182	698.332	624.092	606.503	hypothetical protein (399 nt)	1146	399	52.63
TCONS_00002125	XLOC_002007	NA	MGG_16358	TSS2065	=	MGG_16358T0	supercont8.1:5172465-5175624	725	0.081902	0.285113	0.0965042	0.149202	0	0.25063	0.4321	0.172609	hypothetical protein (564 nt)	725	564	59.04
TCONS_00002127	XLOC_002008	NA	MGG_05424	TSS2066	=	MGG_05424T0	supercont8.1:5175632-5176379	747	0	0.0735646	0	0	0	0.137714	0.0829798	0	hypothetical protein (651 nt)	747	651	58.99
TCONS_00002130	XLOC_002010	NA	MGG_16359	TSS2068	=	MGG_16359T0	supercont8.1:5181735-5182961	537	0.81588	0.364299	1.52574	0.462561	0.459343	0.42425	0.267671	0.400977	hypothetical protein (537 nt)	537	537	59.78
TCONS_00002132	XLOC_002011	NA	MGG_05429	TSS2070	=	MGG_05429T0	supercont8.1:5187984-5189146	946	2.08791	2.29349	2.27483	2.31617	1.67272	2.42988	2.07437	2.37622	hypothetical protein (612 nt)	946	612	51.14
TCONS_00002134	XLOC_002012	NA	MGG_05433	TSS2072	=	MGG_05433T0	supercont8.1:5205591-5207907	2145	4.04887	9.71154	4.9575	3.4052	3.78391	12.829	8.9336	7.37197	solute carrier family 6 protein (2145 nt)	2145	2145	58.18
TCONS_00002135	XLOC_002013	NA	MGG_05434	TSS2073	=	MGG_05434T0	supercont8.1:5208780-5211044	1779	8.34754	7.74455	8.17955	9.03305	7.83002	7.7318	8.39242	7.10944	acriflavine sensitivity control protein acr-2 (1779 nt)	1779	1779	53.96
TCONS_00002136	XLOC_002014	NA	MGG_05436	TSS2074	=	MGG_05436T0	supercont8.1:5211597-5215069	1167	132.093	131.598	152.048	125.259	118.972	158.924	121.784	114.086	translation machinery-associated protein 20 (606 nt)	1167	606	60.73
TCONS_00002137	XLOC_002015	NA	MGG_05437	TSS2075	=	MGG_05437T0	supercont8.1:5215381-5217773	733	484.039	156.542	411.313	526.422	514.383	130.644	171.487	167.495	hypothetical protein (234 nt)	733	234	54.7
TCONS_00002139	XLOC_002015	NA	MGG_05438	TSS2076	=	MGG_05438T0	supercont8.1:5215381-5217773	1470	73.006	107.614	79.306	69.3957	70.3163	113.306	105.317	104.22	Hsc70 cochaperone (1062 nt)	1470	1062	64.22
TCONS_00002140	XLOC_002016	NA	MGG_05440	TSS2077	=	MGG_05440T0	supercont8.1:5218521-5222580	1936	65.0368	79.1365	71.6432	60.5252	62.9421	88.0836	75.3057	74.0203	galactokinase (1575 nt)	1936	1575	64.83
TCONS_00002141	XLOC_002017	NA	MGG_16360	TSS2078	=	MGG_16360T0	supercont8.1:5231960-5232726	381	0	0.0817925	0	0	0	0	0	0.245377	hypothetical protein (381 nt)	381	381	51.97
TCONS_00002143	XLOC_002019	NA	MGG_16361	TSS2080	=	MGG_16361T0	supercont8.1:5235017-5239353	3815	2.08149	4.19511	2.26172	2.11804	1.8647	4.66174	4.05309	3.87049	H/K ATPase alpha subunit (3324 nt)	3815	3324	59.15
TCONS_00002144	XLOC_002020	NA	MGG_13065	TSS2081	=	MGG_13065T0	supercont8.1:5241812-5245669	3625	33.7053	37.2943	37.2362	31.0187	32.861	41.4045	35.4503	35.0283	SCF E3 ubiquitin ligase complex F-box protein grrA (2355 nt)	3625	2355	55.03
TCONS_00002145	XLOC_002021	NA	MGG_05447	TSS2082	=	MGG_05447T0	supercont8.1:5247552-5249977	847	202.852	205.593	166.986	219.746	221.825	165.907	225.131	225.741	glutaredoxin-C2 (354 nt)	847	354	53.39
TCONS_00002146	XLOC_002022	NA	MGG_05450	TSS2083	=	MGG_05450T0	supercont8.1:5255385-5257134	1356	104.662	40.0789	94.7042	106.498	112.785	37.3114	41.5301	41.3951	NADH kinase POS5 (1356 nt)	1356	1356	62.32
TCONS_00002148	XLOC_002024	NA	MGG_16363	TSS2085	=	MGG_16363T0	supercont8.1:5265562-5266204	341	0.180769	0	0	0.542307	0	0	0	0	hypothetical protein (276 nt)	341	276	56.52
TCONS_00002149	XLOC_002025	NA	MGG_13068	TSS2086	=	MGG_13068T0	supercont8.1:5274041-5277019	1954	22.5605	35.5123	24.4712	20.8973	22.313	36.9233	34.0621	35.5515	venom protein 2 (1428 nt)	1954	1428	58.75
TCONS_00002150	XLOC_002026	NA	MGG_05457	TSS2087	=	MGG_05457T0	supercont8.1:5282376-5287625	4677	56.0763	4.07473	62.0618	53.6479	52.5191	4.47507	3.76474	3.98438	hypothetical protein (1395 nt)	4677	1395	60
TCONS_00002151	XLOC_002027	NA	MGG_05463	TSS2088	=	MGG_05463T0	supercont8.1:5307381-5308938	1426	29.2258	31.5447	34.5001	26.2019	26.9752	33.8376	28.8188	31.9776	hypothetical protein (984 nt)	1426	984	58.94
TCONS_00002152	XLOC_002028	NA	MGG_05465	TSS2089	=	MGG_05465T0	supercont8.1:5309106-5312198	576	0.354182	0.612951	0.439776	0.62277	0	0.757898	0.720956	0.36	hypothetical protein (576 nt)	576	576	57.81
TCONS_00002153	XLOC_002029	NA	MGG_05466	TSS2090	=	MGG_05466T0	supercont8.1:5312836-5316015	3079	5.14687	5.17652	5.71238	5.59132	4.13691	5.74324	4.97592	4.8104	hypothetical protein (1329 nt)	3079	1329	52.45
TCONS_00002155	XLOC_002031	NA	MGG_05469	TSS2092	=	MGG_05469T0	supercont8.1:5323822-5324500	444	0	0.0438395	0	0	0	0.131518	0	0	hypothetical protein (444 nt)	444	444	60.14
TCONS_00002156	XLOC_002032	NA	MGG_15181	TSS2093	=	MGG_15181T0	supercont8.1:5325290-5329125	3063	0.0834334	0.0392646	0.0307745	0.082684	0.136842	0.0698787	0.0159862	0.0319289	hypothetical protein (3063 nt)	3063	3063	60.27
TCONS_00002157	XLOC_002033	NA	MGG_13076	TSS2094	=	MGG_13076T0	supercont8.1:5330177-5331164	912	0.224779	0.953739	0.235547	0.110275	0.328514	1.2003	1.27803	0.382893	hypothetical protein (912 nt)	912	912	54.17
TCONS_00002158	XLOC_002034	NA	MGG_05473	TSS2095	=	MGG_05473T0	supercont8.1:5340446-5340922	476	0	0.105373	0	0	0	0.153512	0	0.162608	hypothetical protein (396 nt)	476	396	50.51
TCONS_00002159	XLOC_002035	NA	MGG_16372	TSS2096	=	MGG_16372T0	supercont8.1:5350358-5352931	1299	0.308732	0.815919	0.427432	0.14322	0.355545	0.912624	0.8718	0.663332	hypothetical protein (1299 nt)	1299	1299	49.04
TCONS_00002160	XLOC_002036	NA	MGG_05477	TSS2097	=	MGG_05477T0	supercont8.1:5353560-5355681	1892	73.7847	95.082	74.7564	74.1596	72.4379	93.2047	96.3017	95.7396	26S protease regulatory subunit 4 (1380 nt)	1892	1380	55.51
TCONS_00002161	XLOC_002037	NA	MGG_05479	TSS2098	=	MGG_05479T0	supercont8.1:5358123-5360227	2046	2.06289	1.93774	2.27283	2.04991	1.86594	1.9772	1.78318	2.05283	xylosidase/arabinosidase (1674 nt)	2046	1674	63.2
TCONS_00002162	XLOC_002038	NA	MGG_05480	TSS2099	=	MGG_05480T0	supercont8.1:5360499-5362470	1660	152.566	119.431	167.56	143.158	146.979	131.319	114.299	112.676	succinyl-CoA ligase subunit alpha (1002 nt)	1660	1002	60.68
TCONS_00002163	XLOC_002039	NA	MGG_05482	TSS2100	=	MGG_05482T0	supercont8.1:5365325-5366238	747	0	0.202776	0	0	0	0.44259	0	0.165738	hypothetical protein (747 nt)	747	747	58.1
TCONS_00002164	XLOC_002040	NA	MGG_05483	TSS2101	=	MGG_05483T0	supercont8.1:5367224-5371420	1574	0.710707	0.759172	0.760691	0.745247	0.626182	0.782866	0.664789	0.829861	hypothetical protein (1206 nt)	1574	1206	61.44
TCONS_00002165	XLOC_002041	NA	MGG_16373	TSS2102	=	MGG_16373T0	supercont8.1:5373140-5379762	3136	0	6.35354	0	0	0	0.891845	8.50151	9.66726	hypothetical protein (2067 nt)	3136	2067	57.91
TCONS_00002167	XLOC_002041	NA	MGG_16374	TSS2103	=	MGG_16374T0	supercont8.1:5373140-5379762	1424	91.3816	16.6997	82.3079	96.5121	95.3247	10.0733	19.6404	20.3855	hypothetical protein (1053 nt)	1424	1053	66.38
TCONS_00002168	XLOC_002042	NA	MGG_16375	TSS2104	=	MGG_16375T0	supercont8.1:5379916-5381255	1287	109.21	16.5928	114.223	107.871	105.535	16.4762	16.914	16.3882	aldehyde reductase (975 nt)	1287	975	65.64
TCONS_00002169	XLOC_002043	NA	MGG_16376	TSS2105	=	MGG_16376T0	supercont8.1:5382120-5382356	165	12.9805	0	0	0	38.9415	0	0	0	hypothetical protein (165 nt)	165	165	48.48
TCONS_00002172	XLOC_002046	NA	MGG_05493	TSS2108	=	MGG_05493T0	supercont8.1:5414849-5416025	1092	0.114585	0.0991305	0.0805673	0.0881398	0.175048	0.0931787	0.102175	0.102038	ABC-type Fe3+ transport system (1092 nt)	1092	1092	64.84
TCONS_00002174	XLOC_002048	NA	MGG_16380	TSS2110	=	MGG_16380T0	supercont8.1:5437832-5438249	417	0	0.0685669	0	0	0	0	0	0.205701	hypothetical protein (417 nt)	417	417	51.56
TCONS_00002176	XLOC_002050	NA	MGG_05500	TSS2112	=	MGG_05500T0	supercont8.1:5444872-5446823	1785	0.0989134	0.945913	0.198	0	0.0987401	0.763174	1.18204	0.892526	hypothetical protein (1785 nt)	1785	1785	55.29
TCONS_00002177	XLOC_002051	NA	MGG_16382	TSS2113	=	MGG_16382T0	supercont8.1:5463135-5464187	861	1.98774	0.952445	1.70248	2.37445	1.8863	1.27646	0.619109	0.961766	hypothetical protein (321 nt)	861	321	53.58
TCONS_00002178	XLOC_002052	NA	MGG_16383	TSS2114	=	MGG_16383T0	supercont8.1:5465069-5465839	770	2.69698	0.77237	2.06502	2.47536	3.55057	0.645543	0.637315	1.03425	hypothetical protein (741 nt)	770	741	55.2
TCONS_00002180	XLOC_002054	NA	MGG_13101	TSS2116	=	MGG_13101T0	supercont8.1:5477440-5478515	950	0.0346637	1.93547	0	0	0.103991	2.71311	1.75995	1.33334	hypothetical protein (717 nt)	950	717	59.97
TCONS_00002181	XLOC_002055	NA	MGG_05515	TSS2117	=	MGG_05515T0	supercont8.1:5482171-5483760	1295	0.380948	0.320422	0.569893	0.287481	0.285471	0.503061	0.374987	0.0832178	hypothetical protein (759 nt)	1295	759	47.69
TCONS_00002182	XLOC_002056	NA	MGG_16386	TSS2118	=	MGG_16386T0	supercont8.1:5489936-5490505	444	3.31191	3.54544	5.50487	1.9065	2.52437	4.76273	2.388	3.4856	hypothetical protein (444 nt)	444	444	54.05
TCONS_00002183	XLOC_002057	NA	MGG_05518	TSS2119	=	MGG_05518T0	supercont8.1:5491499-5492022	523	0.487203	0.193033	0.260842	0.482319	0.718448	0.30021	0.139537	0.139353	hypothetical protein (351 nt)	523	351	52.99
TCONS_00002184	XLOC_002058	NA	MGG_16387	TSS2120	=	MGG_16387T0	supercont8.1:5494142-5494544	402	0	0.0735203	0	0	0	0	0	0.220561	hypothetical protein (402 nt)	402	402	54.23
TCONS_00002185	XLOC_002059	NA	MGG_05520	TSS2121	=	MGG_05520T0	supercont8.1:5495342-5497702	1708	0.0689467	0.160024	0.0504596	0.104497	0.0518831	0.116838	0.121187	0.242046	exoglucanase 2 (1464 nt)	1708	1464	64.96
TCONS_00002186	XLOC_002060	NA	MGG_15174	TSS2122	=	MGG_15174T0	supercont8.1:5498325-5498667	342	2.13912	4.65216	1.58838	2.15445	2.67452	4.33516	4.34814	5.27318	hypothetical protein (342 nt)	342	342	58.19
TCONS_00002187	XLOC_002061	NA	MGG_05521	TSS2123	=	MGG_05521T0	supercont8.1:5498979-5500686	1707	4.26241	5.32215	4.76598	3.71211	4.30914	4.96876	5.60862	5.38909	hypothetical protein (1707 nt)	1707	1707	56.82
TCONS_00002188	XLOC_002062	NA	MGG_05522	TSS2124	=	MGG_05522T0	supercont8.1:5500953-5502691	1437	21.5615	17.3313	19.9666	22.5326	22.1854	15.8152	18.3044	17.8743	hypothetical protein (741 nt)	1437	741	61.13
TCONS_00002189	XLOC_002063	NA	MGG_05525	TSS2125	=	MGG_05525T0	supercont8.1:5502926-5510743	2194	116.895	215.707	119.172	116.735	114.779	216.861	216.078	214.182	hypothetical protein (1539 nt)	2194	1539	62.96
TCONS_00002190	XLOC_002064	NA	MGG_16392	TSS2126	=	MGG_16392T0	supercont8.1:5512586-5516883	2105	72.4674	257.508	88.1172	63.4879	65.797	322.272	224.103	226.149	hypothetical protein (1458 nt)	2105	1458	60.84
TCONS_00002191	XLOC_002064	NA	MGG_16393	TSS2127	=	MGG_16393T0	supercont8.1:5512586-5516883	2074	4.87244	7.55577	5.31045	4.66978	4.63709	8.20905	7.49003	6.96823	hypothetical protein (648 nt)	2074	648	58.95
TCONS_00002192	XLOC_002065	NA	MGG_05530	TSS2128	=	MGG_05530T0	supercont8.1:5520790-5522181	1197	0.829363	1.85574	0.44438	0.946815	1.09689	1.95668	1.60082	2.00974	conserved hypothetical protein (1197 nt)	1197	1197	64.41
TCONS_00002193	XLOC_002066	NA	MGG_05531	TSS2129	=	MGG_05531T0	supercont8.1:5522571-5523941	1295	20.5205	72.3729	22.3902	19.0456	20.1257	77.427	69.5392	70.1526	hypothetical protein (522 nt)	1295	522	65.13
TCONS_00002194	XLOC_002067	NA	MGG_13106	TSS2130	=	MGG_13106T0	supercont8.1:5524373-5525609	1236	8.76432	15.0407	8.73968	8.20201	9.35128	15.1627	13.8679	16.0915	hypothetical protein (777 nt)	1236	777	62.16
TCONS_00002195	XLOC_002068	NA	MGG_05532	TSS2131	=	MGG_05532T0	supercont8.1:5525781-5527209	1428	0	0.17231	0	0	0	0.145399	0.223039	0.148492	hypothetical protein (1428 nt)	1428	1428	57.91
TCONS_00002196	XLOC_002069	NA	MGG_05533	TSS2132	=	MGG_05533T0	supercont8.1:5527656-5529044	1311	0	0.178769	0	0	0	0.290065	0.123205	0.123038	chitinase 1 (1311 nt)	1311	1311	63.54
TCONS_00002197	XLOC_002070	NA	MGG_05534	TSS2133	=	MGG_05534T0	supercont8.1:5529983-5533214	3053	13.4905	51.2146	12.2783	13.9119	14.2813	47.9019	52.971	52.7709	BAR domain-containing protein (1407 nt)	3053	1407	61.41
TCONS_00002198	XLOC_002071	NA	MGG_16394	TSS2134	=	MGG_16394T0	supercont8.1:5534145-5537983	933	0	0.201657	0	0	0	0.170711	0.186254	0.248005	hypothetical protein (489 nt)	933	489	59.1
TCONS_00002199	XLOC_002072	NA	MGG_13107	TSS2135	=	MGG_13107T0	supercont8.1:5538176-5540950	1397	35.4594	5.71968	37.504	33.3454	35.5287	6.18501	5.18588	5.78815	hypothetical protein (927 nt)	1397	927	61.38
TCONS_00002200	XLOC_002073	NA	MGG_13108	TSS2136	=	MGG_13108T0	supercont8.1:5545704-5546045	219	3.00215	1.09961	3.42141	2.80204	2.783	1.81433	0	1.48449	hypothetical protein (219 nt)	219	219	57.53
TCONS_00002201	XLOC_002074	NA	MGG_05539	TSS2137	=	MGG_05539T0	supercont8.1:5546389-5548039	1650	4.59043	9.68798	3.48285	5.37885	4.9096	9.41872	9.86075	9.78448	carboxypeptidase 2 (1650 nt)	1650	1650	66.36
TCONS_00002202	XLOC_002075	NA	MGG_15457	TSS2138	=	MGG_15457T0	supercont8.1:5548661-5551359	1932	0	0.0351526	0	0	0	0	0.0263913	0.0790665	arylsulfatase (1932 nt)	1932	1932	63.77
TCONS_00002207	XLOC_002079	NA	MGG_16399	TSS2143	=	MGG_16399T0	supercont8.1:5569828-5570759	763	0.853848	1.27177	0.756598	1.11372	0.691221	1.55865	1.20968	1.04698	hypothetical protein (618 nt)	763	618	60.19
TCONS_00002208	XLOC_002080	NA	MGG_16400	TSS2144	=	MGG_16400T0	supercont8.1:5578028-5580261	2184	0.26348	0.0382112	0.117312	0.317945	0.355184	0.0455188	0.0460973	0.0230174	hypothetical protein (1683 nt)	2184	1683	52.94
TCONS_00002210	XLOC_002082	NA	MGG_05552	TSS2146	=	MGG_05552T0	supercont8.1:5606880-5607952	1072	20.1538	18.5904	17.1584	22.0868	21.2163	16.295	20.1169	19.3593	hypothetical protein (636 nt)	1072	636	69.34
TCONS_00002211	XLOC_002083	NA	MGG_05554	TSS2147	=	MGG_05554T0	supercont8.1:5613791-5615436	1401	0.487791	0.511875	0.548857	0.458863	0.455654	0.396193	0.608081	0.531351	hypothetical protein (1401 nt)	1401	1401	58.39
TCONS_00002212	XLOC_002084	NA	MGG_15152	TSS2148	=	MGG_15152T0	supercont8.1:5625058-5625850	792	0.389245	0	0.640707	0.13245	0.394577	0	0	0	hypothetical protein (792 nt)	792	792	62.63
TCONS_00002213	XLOC_002085	NA	MGG_16403	TSS2149	=	MGG_16403T0	supercont8.1:5626667-5628227	1560	78.8737	23.8203	70.536	81.8336	84.2516	20.1184	25.4202	25.9224	hypothetical protein (1014 nt)	1560	1014	62.62
TCONS_00002214	XLOC_002086	NA	MGG_16404	TSS2150	=	MGG_16404T0	supercont8.1:5632953-5633559	525	0	0.046231	0	0	0	0	0.138693	0	hypothetical protein (429 nt)	525	429	52.45
TCONS_00002216	XLOC_002088	NA	MGG_16408	TSS2152	=	MGG_16408T0	supercont8.1:5672973-5679499	1797	2.92504	18.4894	2.62971	2.91138	3.23401	19.8942	19.1144	16.4595	hypothetical protein (432 nt)	1797	432	55.56
TCONS_00002217	XLOC_002089	NA	MGG_13119	TSS2153	=	MGG_13119T0	supercont8.1:5672973-5679499	3214	3.99011	4.91581	3.30828	4.32015	4.34189	4.45771	5.19388	5.09583	hypothetical protein (1596 nt)	3214	1596	57.64
TCONS_00002218	XLOC_002090	NA	UBA4	TSS2154	=	MGG_05569T0	supercont8.1:5680751-5683799	1826	10.4695	7.34569	10.0146	10.4206	10.9734	7.40399	7.25129	7.3818	adenylyltransferase and sulfurtransferase UBA4 (1473 nt)	1826	1473	59.88
TCONS_00002219	XLOC_002091	NA	MGG_05571	TSS2155	=	MGG_05571T0	supercont8.1:5685510-5687706	1994	1.52822	2.97668	1.32453	1.05164	2.20847	3.30672	2.18346	3.43985	hypothetical protein (1104 nt)	1994	1104	55.62
TCONS_00002220	XLOC_002091	NA	MGG_05571	TSS2155	=	MGG_05571T1	supercont8.1:5685510-5687706	1670	15.3938	28.0529	15.5506	15.9749	14.656	27.6634	28.4452	28.0502	hypothetical protein, variant (780 nt)	1670	780	56.03
TCONS_00002221	XLOC_002092	NA	MGG_16409	TSS2156	=	MGG_16409T0	supercont8.1:5688049-5694792	1182	0.0833665	0.908717	0.0755952	0.174504	0	1.20221	0.868095	0.655843	hypothetical protein (675 nt)	1182	675	59.7
TCONS_00002223	XLOC_002092	NA	MGG_16410	TSS2157	=	MGG_16410T0	supercont8.1:5688049-5694792	2752	4.93391	5.02e-05	5.07197	4.74105	4.98872	0	0.000150529	0	hypothetical protein (1572 nt)	2752	1572	60.31
TCONS_00002224	XLOC_002093	NA	MGG_05575	TSS2158	=	MGG_05575T0	supercont8.1:5695667-5696561	894	0	0.163276	0	0	0	0.0969087	0.131091	0.261829	hypothetical protein (894 nt)	894	894	70.02
TCONS_00002226	XLOC_002095	NA	MGG_05577	TSS2160	=	MGG_05577T0	supercont8.1:5700294-5704496	1986	0.10265	0.0511162	0	0.176506	0.131443	0	0.0511511	0.102197	hypothetical protein (1755 nt)	1986	1755	61.88
TCONS_00002228	XLOC_002095	NA	MGG_05578	TSS2161	=	MGG_05578T0	supercont8.1:5700294-5704496	1943	5.47036	3.69491	7.08127	4.88408	4.44574	4.50704	3.06831	3.50937	C6 zinc finger domain-containing protein (1479 nt)	1943	1479	62.41
TCONS_00002229	XLOC_002096	NA	MGG_05580	TSS2162	=	MGG_05580T0	supercont8.1:5706924-5709122	1974	0	0.090659	0	0	0	0.117471	0.0773053	0.0772005	CAIB/BAIF family enzyme (1974 nt)	1974	1974	63.07
TCONS_00002231	XLOC_002098	NA	MGG_05584	TSS2164	=	MGG_05584T0	supercont8.1:5716844-5719976	2702	15.0026	18.6805	15.757	14.504	14.7469	18.3036	18.635	19.1028	hypothetical protein (2295 nt)	2702	2295	57.04
TCONS_00002232	XLOC_002099	NA	MGG_05587	TSS2165	=	MGG_05587T0	supercont8.1:5726862-5729704	2753	10.9978	11.8551	13.0083	10.0122	9.97276	13.481	11.2377	10.8466	actin-like protein arp-6 (1437 nt)	2753	1437	56.92
TCONS_00002233	XLOC_002100	NA	MGG_05589	TSS2166	=	MGG_05589T0	supercont8.1:5748735-5755754	6759	0.0692841	0.0725049	0.0879411	0.048167	0.0717442	0.0988907	0.0209571	0.0976669	lovastatin nonaketide synthase (6759 nt)	6759	6759	60.7
TCONS_00002234	XLOC_002101	NA	MGG_05590	TSS2167	=	MGG_05590T0	supercont8.1:5757153-5758501	1348	0.618122	1.69213	0.557368	0.479961	0.817036	1.7791	1.7888	1.5085	zeaxanthin epoxidase (1251 nt)	1348	1251	71.3
TCONS_00002235	XLOC_002102	NA	MGG_13126	TSS2168	=	MGG_13126T0	supercont8.1:5763554-5764268	714	53.2106	43.5297	54.7191	51.9567	52.9561	46.8074	42.5362	41.2455	hypothetical protein (714 nt)	714	714	55.46
TCONS_00002236	XLOC_002103	NA	MGG_13127	TSS2169	=	MGG_13127T0	supercont8.1:5764789-5765741	952	0.776484	1.50936	0.76787	0.835567	0.726014	1.50317	1.93689	1.08803	hypothetical protein (870 nt)	952	870	66.44
TCONS_00002237	XLOC_002104	NA	MGG_16416	TSS2170	=	MGG_16416T0	supercont8.1:5775383-5776069	550	0	0.514522	0	0	0	0.126381	0.515775	0.901411	hypothetical protein (459 nt)	550	459	48.15
TCONS_00002238	XLOC_002105	NA	MGG_05597	TSS2171	=	MGG_05597T0	supercont8.1:5791761-5793106	1205	108.2	157.543	113.984	106.847	103.768	168.588	154.912	149.129	hypothetical protein (711 nt)	1205	711	65.26
TCONS_00002239	XLOC_002106	NA	MGG_05598	TSS2172	=	MGG_05598T0	supercont8.1:5793239-5798751	5224	10.004	14.3808	9.93514	9.76052	10.3164	13.8306	14.7342	14.5776	hypothetical protein (3630 nt)	5224	3630	56.64
TCONS_00002240	XLOC_002107	NA	MGG_05600	TSS2173	=	MGG_05600T0	supercont8.1:5806806-5809596	2544	71.8315	25.6384	80.3588	67.0675	68.0683	29.7344	23.9087	23.272	quinate permease (1662 nt)	2544	1662	55.48
TCONS_00002241	XLOC_002108	NA	MGG_05601	TSS2174	=	MGG_05601T0	supercont8.1:5811120-5812548	1428	22.0153	22.0694	22.6652	21.4789	21.9017	23.6736	21.4118	21.123	hypothetical protein (1110 nt)	1428	1110	53.24
TCONS_00002242	XLOC_002109	NA	MGG_05603	TSS2175	=	MGG_05603T0	supercont8.1:5812742-5816026	1208	14.0778	19.2861	14.0066	13.5797	14.6472	19.023	18.7751	20.06	hypothetical protein (813 nt)	1208	813	56.83
TCONS_00002243	XLOC_002110	NA	MGG_13132	TSS2176	=	MGG_13132T0	supercont8.1:5816159-5825638	471	9.46529	3.98836	9.54743	8.88576	9.96266	3.01746	6.1333	2.8143	hypothetical protein (471 nt)	471	471	66.45
TCONS_00002245	XLOC_002112	NA	MGG_16418	TSS2178	=	MGG_16418T0	supercont8.1:5829712-5833862	1224	14.5761	59.9091	16.3308	12.0625	15.3351	62.2946	60.0315	57.4012	hypothetical protein (660 nt)	1224	660	66.36
TCONS_00002247	XLOC_002112	NA	MGG_16419	TSS2179	=	MGG_16419T0	supercont8.1:5829712-5833862	2917	18.3879	7.25247	21.7983	16.7269	16.6386	4.02509	8.9624	8.76992	atypical/ABC1/ABC1-C protein kinase (2190 nt)	2917	2190	58.95
TCONS_00002248	XLOC_002113	NA	MGG_05608	TSS2180	=	MGG_05608T0	supercont8.1:5834058-5836772	881	71.4767	76.0574	71.7779	71.4611	71.1911	72.9325	77.0714	78.1684	hypothetical protein (594 nt)	881	594	64.65
TCONS_00002250	XLOC_002115	NA	MGG_16423	TSS2182	=	MGG_16423T0	supercont8.1:5854746-5857677	868	0	0.0907059	0	0	0	0	0.13615	0.135967	hypothetical protein (855 nt)	868	855	55.44
TCONS_00002251	XLOC_002116	NA	MGG_05614	TSS2183	=	MGG_05614T0	supercont8.1:5857978-5859439	1461	10.8131	34.3191	11.8995	11.0527	9.48719	36.6393	32.8739	33.4441	unsaturated glucuronyl hydrolase (1461 nt)	1461	1461	61.6
TCONS_00002252	XLOC_002117	NA	MGG_05616	TSS2184	=	MGG_05616T0	supercont8.1:5863882-5865868	1986	9.42348	12.8657	10.6739	9.313	8.28359	12.8645	13.3866	12.346	pre-mRNA-splicing factor prp46 (1533 nt)	1986	1533	58.45
TCONS_00002253	XLOC_002118	NA	MGG_05618	TSS2185	=	MGG_05618T0	supercont8.1:5866024-5871062	3451	15.1937	14.2282	15.3949	14.4447	15.7417	13.3869	14.504	14.7937	M protein repeat protein (2682 nt)	3451	2682	60.07
TCONS_00002254	XLOC_002119	NA	MGG_13138	TSS2186	=	MGG_13138T0	supercont8.1:5878457-5879594	351	1.35721	0.386706	1.53769	2.02995	0.503991	0.574637	0.585482	0	hypothetical protein (351 nt)	351	351	57.26
TCONS_00002255	XLOC_002120	NA	MGG_05623	TSS2187	=	MGG_05623T0	supercont8.1:5879688-5883816	1704	19.1094	9.47471	18.3342	19.2261	19.7678	9.87574	9.69029	8.8581	solute carrier family 25 member 38 (1005 nt)	1704	1005	62.69
TCONS_00002256	XLOC_002121	NA	MGG_05624	TSS2188	=	MGG_05624T0	supercont8.1:5884142-5885837	1695	34.8315	29.1	39.4133	34.4	30.667	34	26.7	26.7337	hypothetical protein (1305 nt)	1695	1305	55.1
TCONS_00002257	XLOC_002122	NA	MGG_05626	TSS2189	=	MGG_05626T0	supercont8.1:5889143-5894481	4952	31.7175	33.9699	28.4898	33.4816	33.181	31.2848	35.4328	35.1921	cytoskeleton assembly control protein SLA1p (3468 nt)	4952	3468	58.1
TCONS_00002258	XLOC_002123	NA	MGG_16426	TSS2190	=	MGG_16426T0	supercont8.1:5894703-5895493	790	32.506	14.7743	42.1662	27.1107	28.2412	18.9345	11.8564	13.5	hypothetical protein (486 nt)	790	486	59.67
TCONS_00002259	XLOC_002124	NA	MGG_05628	TSS2191	=	MGG_05628T0	supercont8.1:5896993-5898818	1059	0.275202	0.0893207	0.0954666	0.457536	0.272603	0.0559553	0.106075	0.105932	hypothetical protein (1059 nt)	1059	1059	58.07
TCONS_00002260	XLOC_002125	NA	MGG_05630	TSS2192	=	MGG_05630T0	supercont8.1:5906932-5910614	3421	21.7887	22.389	21.3624	22.7629	21.2409	20.9791	23.3227	22.8652	AMP deaminase 2 (3000 nt)	3421	3000	56.33
TCONS_00002261	XLOC_002126	NA	MGG_05631	TSS2193	=	MGG_05631T0	supercont8.1:5910724-5913371	2550	64.4595	33.2344	73.9706	59.5457	59.8621	36.5151	31.9657	31.2225	UDP-N-acetylglucosamine transporter YEA4 (1332 nt)	2550	1332	56.38
TCONS_00002262	XLOC_002127	NA	MGG_05632	TSS2194	=	MGG_05632T0	supercont8.1:5914459-5915451	992	1.00664	1.85045	0.848564	0.595214	1.57615	1.58663	2.29969	1.66504	hypothetical protein (585 nt)	992	585	63.08
TCONS_00002263	XLOC_002128	NA	MGG_05633	TSS2195	=	MGG_05633T0	supercont8.1:5915922-5917699	1777	0.236942	0.164762	0.262848	0.199878	0.248099	0.117953	0.115904	0.26043	hypothetical protein (1419 nt)	1777	1419	56.24
TCONS_00002264	XLOC_002129	NA	MGG_16428	TSS2196	=	MGG_16428T0	supercont8.1:5918270-5921037	1004	0.55222	1.15088	0	0.977316	0.679344	0	1.64258	1.81006	hypothetical protein (585 nt)	1004	585	55.73
TCONS_00002266	XLOC_002129	NA	MGG_16429	TSS2197	=	MGG_16429T0	supercont8.1:5918270-5921037	1541	39.6857	37.872	41.8071	37.9412	39.3087	36.808	38.6172	38.1909	hypothetical protein (744 nt)	1541	744	63.98
TCONS_00002267	XLOC_002130	NA	MGG_05636	TSS2198	=	MGG_05636T0	supercont8.1:5921736-5923198	1462	3.34788	7.79977	4.20074	2.683	3.1599	8.21563	7.56083	7.62286	hypothetical protein (1017 nt)	1462	1017	52.41
TCONS_00002268	XLOC_002131	NA	MGG_05638	TSS2199	=	MGG_05638T0	supercont8.1:5929273-5931306	1912	3977.87	480.657	3634.34	4183.05	4116.2	451.721	497.447	492.801	hypothetical protein (432 nt)	1912	432	65.51
TCONS_00002270	XLOC_002132	NA	MGG_05639	TSS2201	=	MGG_05639T0	supercont8.1:5932906-5937321	2844	0.198929	0.000252539	0	0.596787	0	0	0.000757616	0	DNA mismatch repair protein MutS (2844 nt)	2844	2844	51.23
TCONS_00002272	XLOC_002132	NA	MGG_05640	TSS2202	=	MGG_05640T0	supercont8.1:5932906-5937321	750	136.979	89.7935	131.971	139.058	139.906	93.1013	86.5641	89.7151	hypothetical protein (438 nt)	750	438	61.87
TCONS_00002273	XLOC_002133	NA	MGG_05641	TSS2203	=	MGG_05641T0	supercont8.1:5938303-5940001	1608	0.57171	0.250284	0.320758	0.783259	0.611112	0.264561	0.25952	0.226773	hypothetical protein (1608 nt)	1608	1608	61.19
TCONS_00002274	XLOC_002134	NA	MGG_05642	TSS2204	=	MGG_05642T0	supercont8.1:5944208-5947732	3273	19.3208	21.3618	20.012	18.9011	19.0492	21.4819	21.8669	20.7364	hypothetical protein (2454 nt)	3273	2454	54.12
TCONS_00002275	XLOC_002135	NA	MGG_05646	TSS2205	=	MGG_05646T0	supercont8.1:5965503-5969868	2888	109.943	101.492	119.745	102.763	107.319	112.941	94.9471	96.5864	G2/mitotic-specific cyclin-B (1485 nt)	2888	1485	54.95
TCONS_00002276	XLOC_002136	NA	MGG_05651	TSS2206	=	MGG_05651T0	supercont8.1:5981713-5983612	1354	96.0362	164.763	108.387	90.5157	89.2054	191.262	149.521	153.505	casein kinase II subunit beta-2 (822 nt)	1354	822	58.27
TCONS_00002277	XLOC_002137	NA	MGG_05652	TSS2207	=	MGG_05652T0	supercont8.1:5983798-5989432	5487	15.6275	11.2363	13.9032	16.0266	16.9525	10.5818	11.3506	11.7765	hypothetical protein (3438 nt)	5487	3438	55.15
TCONS_00002278	XLOC_002138	NA	MGG_05656	TSS2208	=	MGG_05656T0	supercont8.1:5996221-6002712	6419	4.3711	5.00665	4.3408	4.76234	4.01017	4.9704	5.07606	4.97351	ankyrin repeat protein (5400 nt)	6419	5400	52.33
TCONS_00002279	XLOC_002139	NA	MGG_05657	TSS2209	=	MGG_05657T0	supercont8.1:6003060-6007018	890	89.1914	93.3402	109.204	78.4991	79.8715	109.264	86.0944	84.6621	hypothetical protein (264 nt)	890	264	53.03
TCONS_00002280	XLOC_002140	NA	MGG_05659	TSS2210	=	MGG_05659T0	supercont8.1:6007092-6012223	3975	2.18271	3.11366	1.6086	2.6139	2.32565	2.72246	3.40849	3.21004	hypothetical protein (1461 nt)	3975	1461	58.04
TCONS_00002283	XLOC_002143	NA	MGG_05660	TSS2213	=	MGG_05660T0	supercont8.1:6019996-6021823	1493	13.2633	19.9567	13.9374	12.6682	13.1844	20.9456	20.2341	18.6904	uridine nucleosidase (1155 nt)	1493	1155	58.01
TCONS_00002285	XLOC_002145	NA	MGG_05662	TSS2215	=	MGG_05662T0	supercont8.1:6025167-6028054	1545	74.7346	47.2369	66.0632	79.698	78.4427	41.6167	50.0808	50.0131	shwachman-Bodian-Diamond syndrome protein (963 nt)	1545	963	58.88
TCONS_00002286	XLOC_002146	NA	MGG_05664	TSS2216	=	MGG_05664T0	supercont8.1:6031317-6036463	4886	31.9925	20.8268	34.4209	31.0208	30.5358	21.3189	20.3995	20.7622	cAMP-specific 3',5'-cyclic phosphodiesterase 7B (2682 nt)	4886	2682	52.09
TCONS_00002287	XLOC_002147	NA	MGG_05666	TSS2217	=	MGG_05666T0	supercont8.1:6041301-6047775	5841	21.6446	23.0465	21.7543	21.9516	21.2278	22.7661	22.6587	23.7147	ubiquitin specific peptidase 11 (4548 nt)	5841	4548	54.55
TCONS_00002288	XLOC_002148	NA	MGG_13149	TSS2218	=	MGG_13149T0	supercont8.1:6048455-6052413	3718	59.8786	59.9639	57.1927	62.8229	59.6202	56.467	62.0534	61.3712	A-factor-processing enzyme (3381 nt)	3718	3381	52.03
TCONS_00002289	XLOC_002149	NA	MGG_16440	TSS2219	=	MGG_16440T0	supercont8.1:6054017-6054413	300	0	0.143765	0	0	0	0.431295	0	0	hypothetical protein (300 nt)	300	300	48
TCONS_00002290	XLOC_002150	NA	MGG_05667	TSS2220	=	MGG_05667T0	supercont8.1:6055064-6056966	1836	16.3929	16.7023	13.4708	16.9086	18.7993	14.3464	18.2413	17.5191	hypothetical protein (804 nt)	1836	804	55.47
TCONS_00002291	XLOC_002151	NA	MGG_05671	TSS2221	=	MGG_05671T0	supercont8.1:6067884-6071511	2703	112.331	95.3302	134.587	99.313	103.093	113.34	87.1237	85.5267	protein phosphatase PP2A regulatory subunit A (1872 nt)	2703	1872	55.4
TCONS_00002292	XLOC_002152	NA	MGG_16443	TSS2222	=	MGG_16443T0	supercont8.1:6072274-6076052	3686	19.6761	17.5234	20.7381	19.314	18.9764	18.708	16.8638	16.9983	protein phosphatase (2430 nt)	3686	2430	53.25
TCONS_00002293	XLOC_002153	NA	MGG_05674	TSS2223	=	MGG_05674T0	supercont8.1:6078172-6081446	2836	39.937	47.2466	42.888	38.9396	37.9834	49.3956	46.3509	45.9933	hypothetical protein (1233 nt)	2836	1233	54.26
TCONS_00002294	XLOC_002154	NA	MGG_05675	TSS2224	=	MGG_05675T0	supercont8.1:6082307-6086475	3977	32.5158	36.8901	32.6662	33.2939	31.5872	36.4155	37.6433	36.6115	hypothetical protein (2517 nt)	3977	2517	51.93
TCONS_00002295	XLOC_002155	NA	MGG_05677	TSS2225	=	MGG_05677T0	supercont8.1:6089610-6091046	1269	91.4041	71.5266	98.0135	89.0687	87.1302	75.1763	68.9599	70.4436	glutathione S-transferase I (858 nt)	1269	858	55.01
TCONS_00002296	XLOC_002156	NA	MGG_05678	TSS2226	=	MGG_05678T0	supercont8.1:6093367-6096787	3005	16.9578	16.5645	19.2792	16.203	15.3912	17.6872	15.7287	16.2776	hypothetical protein (2385 nt)	3005	2385	51.61
TCONS_00002297	XLOC_002157	NA	MGG_05680	TSS2227	=	MGG_05680T0	supercont8.1:6097664-6099018	1255	19.2124	12.1412	18.9896	19.3916	19.256	12.7018	12.5386	11.1831	hypothetical protein (792 nt)	1255	792	61.36
TCONS_00002298	XLOC_002158	NA	MGG_05682	TSS2228	=	MGG_05682T0	supercont8.1:6099114-6102778	1820	53.4305	75.5663	57.6185	51.4198	51.2532	81.9685	73.0344	71.6959	CSN-1 (1377 nt)	1820	1377	52.65
TCONS_00002299	XLOC_002159	NA	MGG_05684	TSS2229	=	MGG_05684T0	supercont8.1:6111998-6114117	1823	10.5601	8.02154	11.212	10.3427	10.1257	7.65977	8.30647	8.09839	xaa-Pro dipeptidase (1581 nt)	1823	1581	62.87
TCONS_00002300	XLOC_002160	NA	MGG_05685	TSS2230	=	MGG_05685T0	supercont8.1:6115427-6116904	1353	25.328	36.641	24.3522	25.3963	26.2356	34.6938	37.4422	37.7869	hypothetical protein (1353 nt)	1353	1353	56.91
TCONS_00002301	XLOC_002161	NA	MGG_05688	TSS2231	=	MGG_05688T0	supercont8.1:6121061-6127668	1580	6.94657	6.60239	6.33546	7.30602	7.19823	5.88323	7.08244	6.8415	hypothetical protein (1200 nt)	1580	1200	61.25
TCONS_00002302	XLOC_002162	NA	MGG_05695	TSS2232	=	MGG_05695T0	supercont8.1:6142926-6150907	3522	3.2633	8.40843	3.13885	3.08862	3.56243	8.46482	8.55808	8.20239	hypothetical protein (2511 nt)	3522	2511	56.35
TCONS_00002303	XLOC_002163	NA	MGG_16444	TSS2233	=	MGG_16444T0	supercont8.1:6152573-6156775	3807	21.51	26.201	19.8694	22.2997	22.3608	25.4641	26.67	26.4689	C6 transcription factor Prf (2703 nt)	3807	2703	54.98
TCONS_00002304	XLOC_002164	NA	MGG_05698	TSS2234	=	MGG_05698T0	supercont8.1:6158536-6170251	1068	2.39408	3.10567	2.3089	2.44522	2.42813	3.12796	2.57206	3.617	WD repeat-containing protein (1068 nt)	1068	1068	53.18
TCONS_00002305	XLOC_002165	NA	MGG_05700	TSS2235	=	MGG_05700T0	supercont8.1:6158536-6170251	5795	3.22541	4.08569	3.27708	3.13347	3.26569	3.96014	4.03674	4.2602	RecQ helicase MUSN (5343 nt)	5795	5343	53.73
TCONS_00002306	XLOC_002166	NA	MGG_05702	TSS2236	=	MGG_05702T0	supercont8.1:6170425-6172650	1375	134.735	22.1754	149.188	125.954	129.064	23.5583	20.7028	22.2652	methyltransferase (906 nt)	1375	906	62.58
TCONS_00002307	XLOC_002167	NA	MGG_16445	TSS2237	=	MGG_16445T0	supercont8.1:6172999-6178501	2639	259.803	128.279	284.221	250.496	244.691	140.984	120.035	123.818	hypothetical protein (1794 nt)	2639	1794	57.8
TCONS_00002309	XLOC_002167	NA	MGG_16446	TSS2238	=	MGG_16446T0	supercont8.1:6172999-6178501	1152	0	0.145981	0	0	0	0.437943	0	0	hypothetical protein (333 nt)	1152	333	57.36
TCONS_00002310	XLOC_002168	NA	MGG_05706	TSS2239	=	MGG_05706T0	supercont8.1:6180782-6186251	5415	22.0203	18.2106	22.1971	21.9109	21.9529	18.4047	17.9372	18.29	hypothetical protein (2823 nt)	5415	2823	57.53
TCONS_00002311	XLOC_002169	NA	MGG_05708	TSS2240	=	MGG_05708T0	supercont8.1:6189959-6192596	1703	51.5787	54.115	57.5199	48.8048	48.4113	59.7337	50.5202	52.091	SFT2 domain-containing protein (648 nt)	1703	648	56.64
TCONS_00002312	XLOC_002170	NA	MGG_16447	TSS2241	=	MGG_16447T0	supercont8.1:6193754-6194094	340	0.870878	0.104815	1.52428	0.546054	0.542295	0	0	0.314446	hypothetical protein (258 nt)	340	258	55.43
TCONS_00002313	XLOC_002171	NA	MGG_16448	TSS2242	=	MGG_16448T0	supercont8.1:6195334-6200452	204	9.02415	7.18148	0	9.06597	18.0065	10.2903	6.75755	4.49661	hypothetical protein (204 nt)	204	204	52.45
TCONS_00002314	XLOC_002172	NA	MGG_05710	TSS2243	=	MGG_05710T0	supercont8.1:6200605-6202896	1530	11.6639	2.64162	14.1666	9.7115	11.1136	2.3315	3.26177	2.33158	hypothetical protein (1530 nt)	1530	1530	55.88
TCONS_00002315	XLOC_002173	NA	MGG_05712	TSS2244	=	MGG_05712T0	supercont8.1:6203882-6206572	2580	16.2759	22.2921	15.3052	16.7375	16.7849	20.6195	23.125	23.132	hypothetical protein (2580 nt)	2580	2580	55.43
TCONS_00002316	XLOC_002174	NA	MGG_05714	TSS2245	=	MGG_05714T0	supercont8.1:6210914-6216597	5262	7.01483	12.0572	6.57256	7.20699	7.26493	10.4259	12.8772	12.8687	hypothetical protein (4023 nt)	5262	4023	55.8
TCONS_00002317	XLOC_002175	NA	MGG_05715	TSS2246	=	MGG_05715T0	supercont8.1:6221502-6225524	4022	46.3302	17.0604	49.1539	44.5308	45.3059	18.3402	16.2461	16.5949	verprolin (3048 nt)	4022	3048	58.01
TCONS_00002318	XLOC_002176	NA	MGG_13154	TSS2247	=	MGG_13154T0	supercont8.1:6236392-6238897	2391	13.4228	12.3356	12.6494	13.6786	13.9403	12.4097	12.4425	12.1546	pre-mRNA-processing factor 31 (1791 nt)	2391	1791	56.78
TCONS_00002319	XLOC_002177	NA	MGG_05721	TSS2248	=	MGG_05721T0	supercont8.1:6238919-6243375	1911	11.1505	8.56081	12.9791	10.0426	10.4297	8.91741	8.3348	8.43022	hypothetical protein (1674 nt)	1911	1674	58.72
TCONS_00002321	XLOC_002179	NA	MGG_13157	TSS2250	=	MGG_13157T0	supercont8.1:6261252-6264213	2961	11.165	8.02776	10.6577	11.1739	11.6632	8.28138	7.57503	8.22686	acetate kinase (1299 nt)	2961	1299	59.89
TCONS_00002322	XLOC_002180	NA	MGG_16452	TSS2251	=	MGG_16452T0	supercont8.1:6265432-6265776	276	5.45097	2.40039	6.61251	2.93608	6.80432	2.15995	1.68175	3.35946	hypothetical protein (276 nt)	276	276	53.26
TCONS_00002324	XLOC_002182	NA	MGG_13161	TSS2253	=	MGG_13161T0	supercont8.1:6281100-6283167	1980	17.6686	15.4351	19.2474	16.6958	17.0626	15.3014	16.3336	14.6701	hypothetical protein (1980 nt)	1980	1980	58.74
TCONS_00002326	XLOC_002183	NA	MGG_16454	TSS2254	=	MGG_16454T0	supercont8.1:6284345-6289627	432	1.86581	0.518317	2.61362	0	2.98381	0.647277	0	0.907675	hypothetical protein (273 nt)	432	273	54.58
TCONS_00002327	XLOC_002183	NA	MGG_16454	TSS2254	=	MGG_16454T1	supercont8.1:6284345-6289627	341	0	0.342766	0	0	0	0	0.625397	0.402901	hypothetical protein, variant (234 nt)	341	234	57.69
TCONS_00002328	XLOC_002184	NA	MGG_15163	TSS2255	=	MGG_15163T0	supercont8.1:6284345-6289627	2882	10.0677	10.5684	10.2405	9.85507	10.1074	10.0677	10.5277	11.1098	calpain (786 nt)	2882	786	51.4
TCONS_00002329	XLOC_002185	NA	MGG_13165	TSS2256	=	MGG_13165T0	supercont8.1:6301287-6305179	3673	43.8184	58.1624	37.6487	47.1814	46.6252	51.9565	61.1951	61.3357	hypothetical protein (1800 nt)	3673	1800	56.67
TCONS_00002330	XLOC_002186	NA	MGG_05730	TSS2257	=	MGG_05730T0	supercont8.1:6313653-6316114	1749	38.6371	59.442	44.3859	35.7616	35.7639	66.1307	58.1107	54.0846	GTP-binding protein RBG1 (1104 nt)	1749	1104	55.53
TCONS_00002331	XLOC_002187	NA	MGG_05731	TSS2258	=	MGG_05731T0	supercont8.1:6316203-6318580	2237	5.76706	6.90297	6.11469	5.53574	5.65075	6.84408	6.75764	7.1072	cyclophilin-type peptidyl-prolyl cis-trans isomerase (1872 nt)	2237	1872	53.95
TCONS_00002332	XLOC_002188	NA	MGG_05733	TSS2259	=	MGG_05733T0	supercont8.1:6320951-6321934	723	2.21681	2.02048	3.2152	2.09674	1.3385	1.98711	1.99518	2.07915	hypothetical protein (723 nt)	723	723	54.91
TCONS_00002333	XLOC_002189	NA	MGG_16456	TSS2260	=	MGG_16456T0	supercont8.1:6322454-6329822	2042	3.52349	4.66411	0	5.13521	5.43525	0.0301698	6.92379	7.03839	hypothetical protein (1314 nt)	2042	1314	65.75
TCONS_00002335	XLOC_002189	NA	MGG_16457	TSS2261	=	MGG_16457T0	supercont8.1:6322454-6329822	3267	6.48985	7.04282	2.64726	8.6959	8.12639	1.90497	9.90908	9.31439	hypothetical protein (2832 nt)	3267	2832	53.43
TCONS_00002336	XLOC_002190	NA	MGG_15165	TSS2262	=	MGG_15165T0	supercont8.1:6330081-6331011	665	31.1007	16.6881	35.9721	26.7532	30.5768	19.0027	15.3951	15.6665	hypothetical protein (249 nt)	665	249	49
TCONS_00002337	XLOC_002191	NA	MGG_05738	TSS2263	=	MGG_05738T0	supercont8.1:6333016-6336792	3692	11.1546	18.3054	11.3875	11.4148	10.6615	18.4655	18.2247	18.2261	paxillin (2778 nt)	3692	2778	60.15
TCONS_00002338	XLOC_002192	NA	MGG_16458	TSS2264	=	MGG_16458T0	supercont8.1:6337045-6337531	360	0	0.0922795	0	0	0	0	0.276839	0	hypothetical protein (255 nt)	360	255	48.63
TCONS_00002339	XLOC_002193	NA	MGG_15166	TSS2265	=	MGG_15166T0	supercont8.1:6338975-6345172	705	0.543931	2.51801	0.859759	0.310111	0.461924	2.79799	2.06551	2.69054	hypothetical protein (705 nt)	705	705	60.99
TCONS_00002340	XLOC_002194	NA	MGG_15167	TSS2266	=	MGG_15167T0	supercont8.1:6338975-6345172	2513	2.17424	3.93536	2.1067	1.9779	2.43813	4.0782	3.75786	3.97003	succinyl-CoA ligase subunit alpha (2202 nt)	2513	2202	62.72
TCONS_00002341	XLOC_002195	NA	MGG_15168	TSS2267	=	MGG_15168T0	supercont8.1:6345284-6346545	1261	1.40808	0.643493	1.71204	1.18661	1.3256	1.20012	0.343946	0.386417	hypothetical protein (1179 nt)	1261	1179	62.6
TCONS_00002342	XLOC_002196	NA	MGG_05741	TSS2268	=	MGG_05741T0	supercont8.1:6347067-6348088	663	100.504	37.4548	113.246	95.3039	92.9616	44.4019	33.955	34.0074	isochorismatase domain-containing protein 2 (663 nt)	663	663	66.82
TCONS_00002343	XLOC_002197	NA	MGG_13168	TSS2269	=	MGG_13168T0	supercont8.1:6349008-6352631	3623	21.6638	15.2708	19.6513	23.4506	21.8896	13.9473	16.0903	15.7746	hypothetical protein (2124 nt)	3623	2124	58.95
TCONS_00002344	XLOC_002198	NA	MGG_05744	TSS2270	=	MGG_05744T0	supercont8.1:6361790-6362533	509	0.167363	0.0485818	0	0.251921	0.25017	0	0.145746	0	hypothetical protein (462 nt)	509	462	55.41
TCONS_00002345	XLOC_002199	NA	MGG_16461	TSS2271	=	MGG_16461T0	supercont8.1:6362597-6366881	2446	6.21751	5.56995	0	9.4815	9.17102	0	8.4929	8.21696	hypothetical protein (1527 nt)	2446	1527	56.78
TCONS_00002347	XLOC_002199	NA	MGG_16462	TSS2272	=	MGG_16462T0	supercont8.1:6362597-6366881	1517	335.901	188.161	335.951	336.728	335.025	184.252	189.205	191.026	cytochrome c1 (975 nt)	1517	975	60.51
TCONS_00002348	XLOC_002200	NA	MGG_16463	TSS2273	=	MGG_16463T0	supercont8.1:6378139-6379336	1016	1.15469	1.46488	0.966976	1.54082	0.956286	1.43895	1.17207	1.78361	hypothetical protein (447 nt)	1016	447	50.56
TCONS_00002349	XLOC_002201	NA	MGG_05749	TSS2274	=	MGG_05749T0	supercont8.1:6382346-6383247	726	0.107864	0.0899317	0.174672	0.148921	0	0.0973955	0.0862575	0.0861422	hypothetical protein (660 nt)	726	660	59.7
TCONS_00002350	XLOC_002202	NA	MGG_13171	TSS2275	=	MGG_13171T0	supercont8.1:6383752-6390768	6925	14.6285	24.0815	15.7659	13.5299	14.5897	25.4273	23.4586	23.3586	E3 ubiquitin-protein ligase ubr1 (6621 nt)	6925	6621	53.36
TCONS_00002351	XLOC_002203	NA	MGG_05751	TSS2276	=	MGG_05751T0	supercont8.1:6392602-6394342	1630	95.6848	55.21	97.1254	93.4863	96.4427	60.4822	51.9072	53.2405	hypothetical protein (480 nt)	1630	480	57.29
TCONS_00002352	XLOC_002204	NA	MGG_13172	TSS2277	=	MGG_13172T0	supercont8.1:6395437-6398136	2622	11.6291	8.31149	11.089	13.0931	10.7052	8.60517	8.44391	7.88538	WLM domain-containing protein (1635 nt)	2622	1635	57
TCONS_00002353	XLOC_002205	NA	MGG_05752	TSS2278	=	MGG_05752T0	supercont8.1:6398415-6399111	342	278.832	325.791	312.571	269.845	254.079	333.937	328.906	314.53	hypothetical protein (342 nt)	342	342	56.73
TCONS_00002354	XLOC_002206	NA	MGG_05753	TSS2279	=	MGG_05753T0	supercont8.1:6399768-6401484	1533	295.601	462.271	305.638	290.16	291.005	460.875	464.703	461.235	protein disulfide-isomerase (1533 nt)	1533	1533	56.95
TCONS_00002356	XLOC_002208	NA	MGG_05755	TSS2281	=	MGG_05755T0	supercont8.1:6407279-6410410	2570	13.7414	16.7584	13.3961	14.1786	13.6497	16.2458	17.6436	16.3858	vacuolar fusion protein mon-1 (1893 nt)	2570	1893	59.64
TCONS_00002357	XLOC_002209	NA	MGG_05756	TSS2282	=	MGG_05756T0	supercont8.1:6410601-6417995	2501	14.4834	13.8705	14.5138	15.0485	13.888	13.4988	14.1752	13.9376	hypothetical protein (750 nt)	2501	750	60.67
TCONS_00002358	XLOC_002210	NA	MGG_05758	TSS2283	=	MGG_05758T0	supercont8.1:6418160-6420678	913	71.6051	69.8909	60.5116	79.3973	74.9062	58.7949	74.7881	76.0896	defender against cell death 1 protein (435 nt)	913	435	56.09
TCONS_00002359	XLOC_002211	NA	MGG_05760	TSS2284	=	MGG_05760T0	supercont8.1:6434012-6434794	618	21.7832	29.7735	21.2041	20.5662	23.5793	29.1767	28.9019	31.2418	hypothetical protein (618 nt)	618	618	62.14
TCONS_00002361	XLOC_002213	NA	MGG_05761	TSS2286	=	MGG_05761T0	supercont8.1:6435507-6440358	2087	0	0.075762	0	0	0	0.154662	0.0242299	0.0483942	hypothetical protein (1875 nt)	2087	1875	54.24
TCONS_00002362	XLOC_002214	NA	MGG_05763	TSS2287	=	MGG_05763T0	supercont8.1:6442480-6443274	650	45.1941	41.0396	41.379	44.4952	49.7082	37.3257	43.1766	42.6165	stress responsive A/B barrel domain-containing protein (333 nt)	650	333	52.25
TCONS_00002363	XLOC_002215	NA	MGG_05764	TSS2288	=	MGG_05764T0	supercont8.1:6444010-6444582	507	0.420364	2.78912	0.25047	0.507074	0.50355	3.53124	1.61346	3.22266	hypothetical protein (507 nt)	507	507	69.03
TCONS_00002364	XLOC_002216	NA	MGG_05767	TSS2289	=	MGG_05767T0	supercont8.1:6448957-6450740	1783	5.16934	66.5727	5.58883	4.67938	5.23982	66.0396	68.1538	65.5247	hypothetical protein (1602 nt)	1783	1602	56.68
TCONS_00002365	XLOC_002217	NA	MGG_05769	TSS2290	=	MGG_05769T0	supercont8.1:6454121-6456251	2130	1.19886	2.56307	1.0723	1.30728	1.21699	1.95969	2.89038	2.83914	hypothetical protein (2130 nt)	2130	2130	57.14
TCONS_00002366	XLOC_002218	NA	MGG_11092	TSS2291	=	MGG_11092T0	supercont8.1:6459326-6459830	504	0	0.179522	0	0	0	0.242564	0.148099	0.147904	hypothetical protein (504 nt)	504	504	65.28
TCONS_00002367	XLOC_002219	NA	MGG_16471	TSS2292	=	MGG_16471T0	supercont8.1:6486066-6487293	1227	0.949138	0.329499	1.09402	0.536249	1.21714	0.411542	0.310862	0.266093	hypothetical protein (390 nt)	1227	390	53.08
TCONS_00002368	XLOC_002220	NA	MGG_10605	TSS2293	=	MGG_10605T0	supercont8.1:6490238-6492448	2091	37.1671	28.5721	36.0209	36.3978	39.0825	28.2583	28.4827	28.9753	kelch repeats protein (2091 nt)	2091	2091	60.69
TCONS_00002369	XLOC_002221	NA	MGG_16472	TSS2294	=	MGG_16472T0	supercont8.1:6492638-6496363	3318	186.333	104.225	204.917	176.061	178.02	110.377	99.685	102.614	aminopeptidase 2 (2925 nt)	3318	2925	55.25
TCONS_00002370	XLOC_002222	NA	MGG_14329	TSS2295	=	MGG_14329T0	supercont8.1:6499301-6503651	4196	17.2007	9.76553	16.0907	17.2865	18.2248	8.75185	9.93579	10.6089	BUB protein kinase (3759 nt)	4196	3759	58.18
TCONS_00002371	XLOC_002223	NA	MGG_14330	TSS2296	=	MGG_14330T0	supercont8.1:6503843-6505707	1653	3.28848	0.502273	3.27108	3.68696	2.90739	0.344122	0.754541	0.408156	hypothetical protein (1584 nt)	1653	1584	53.66
TCONS_00002372	XLOC_002224	NA	MGG_10609	TSS2297	=	MGG_10609T0	supercont8.1:6507407-6509111	1653	16.1147	14.4772	14.9038	16.1576	17.2828	13.8681	14.242	15.3216	DNA-(apurinic or apyrimidinic site) lyase 1 (1437 nt)	1653	1437	56.85
TCONS_00002373	XLOC_002225	NA	MGG_16474	TSS2298	=	MGG_16474T0	supercont8.1:6520692-6521376	574	6.06717	8.62482	7.8035	5.21716	5.18084	8.6127	8.57626	8.68552	hypothetical protein (507 nt)	574	507	51.87
TCONS_00002374	XLOC_002226	NA	MGG_10613	TSS2299	=	MGG_10613T0	supercont8.1:6532415-6533832	1244	0.102982	0.480184	0.0833758	0.15073	0.0748383	0.392887	0.393206	0.654459	retinol dehydrogenase 11 (969 nt)	1244	969	58.51
TCONS_00002376	XLOC_002228	NA	MGG_10619	TSS2301	=	MGG_10619T0	supercont8.1:6542473-6543309	763	0.290087	4.92848	0.175156	0.556862	0.138244	6.16236	4.19354	4.42954	hypothetical protein (645 nt)	763	645	63.26
TCONS_00002378	XLOC_002230	NA	MGG_10627	TSS2303	=	MGG_10627T0	supercont8.1:6553219-6556189	2913	2.0036	2.16367	2.09973	1.77403	2.13704	2.58048	1.78803	2.12251	ATP-dependent DNA ligase domain-containing protein (2913 nt)	2913	2913	53.04
TCONS_00002379	XLOC_002231	NA	MGG_15173	TSS2304	=	MGG_15173T0	supercont8.1:6561261-6563591	2238	1.54188	2.0718	2.04462	0.967313	1.61371	2.26888	1.84005	2.10647	HET domain-containing protein (2238 nt)	2238	2238	50.89
TCONS_00002380	XLOC_002232	NA	MGG_10632	TSS2305	=	MGG_10632T0	supercont8.1:6564002-6569875	2638	108.813	67.704	114.607	105.288	106.543	72.3617	64.6131	66.1371	hypothetical protein (1872 nt)	2638	1872	56.41
TCONS_00002381	XLOC_002233	NA	MGG_16477	TSS2306	=	MGG_16477T0	supercont8.1:6575221-6580194	4912	3.87619	2.72521	4.04621	3.98819	3.59417	2.50268	2.78984	2.88311	hypothetical protein (2313 nt)	4912	2313	55.99
TCONS_00002382	XLOC_002234	NA	MGG_14299	TSS2307	=	MGG_14299T0	supercont8.1:6580401-6581900	1429	0.394009	0.192997	0.288265	0.44845	0.445313	0.133626	0.185716	0.25965	hypothetical protein (861 nt)	1429	861	58.42
TCONS_00002383	XLOC_002235	NA	MGG_14297	TSS2308	=	MGG_14297T0	supercont8.1:6582536-6584021	1437	40.6605	33.5086	49.5459	36.345	36.0908	38.8268	31.0732	30.6258	adenosylmethionine decarboxylase (1437 nt)	1437	1437	58.8
TCONS_00002384	XLOC_002236	NA	MGG_10636	TSS2309	=	MGG_10636T0	supercont8.1:6585095-6586328	930	20.935	22.6172	22.6093	19.6859	20.5098	24.6805	21.6935	21.4776	cytosolic Fe-S cluster assembly factor CFD1 (930 nt)	930	930	55.81
TCONS_00002385	XLOC_002237	NA	MGG_10639	TSS2310	=	MGG_10639T0	supercont8.1:6590990-6593616	2626	4.79963	3.05232	4.71067	4.84493	4.8433	2.97547	3.01746	3.16403	hypothetical protein (2313 nt)	2626	2313	55.51
TCONS_00002386	XLOC_002238	NA	MGG_10640	TSS2311	=	MGG_10640T0	supercont8.1:6593836-6596176	2229	0.194095	0.0299277	0.233056	0.272046	0.0771833	0.0222581	0	0.067525	interferon-induced GTP-binding protein Mx (2229 nt)	2229	2229	52.18
TCONS_00002388	XLOC_002240	NA	MGG_10893	TSS2313	=	MGG_10893T0	supercont8.1:6613905-6615688	1663	4.23444	2.34935	5.08253	3.93109	3.68969	2.804	2.34188	1.90215	hypothetical protein (1548 nt)	1663	1548	61.18
TCONS_00002389	XLOC_002241	NA	MGG_16480	TSS2314	=	MGG_16480T0	supercont8.1:6627418-6628275	669	0.229748	0.0965302	0.189892	0.333677	0.165676	0	0.096616	0.192974	hypothetical protein (669 nt)	669	669	51.12
TCONS_00002391	XLOC_002243	NA	MGG_16481	TSS2316	=	MGG_16481T0	supercont8.1:6630365-6631465	1023	7.54996	8.45108	7.89677	8.02091	6.73221	7.87716	8.68863	8.78746	hypothetical protein (873 nt)	1023	873	48.11
TCONS_00002392	XLOC_002244	NA	MGG_15320	TSS2317	=	MGG_15320T0	supercont8.1:6631921-6633258	630	0	0.318203	0	0	0	0.533827	0.210531	0.21025	hypothetical protein (630 nt)	630	630	47.62
[truncated: 9,364 more rows]

## Sheet: FDR 0.05
isoform_id	gene_id	CDS_id	gene_short_name	TSS_group_id	class_code	nearest_ref_id	locus	length	Hypoxia	Control	Hypoxia_0	Hypoxia_1	Hypoxia_2	Control_0	Control_1	Control_2	Desc	Exon_Len	Trans_Len	GC
[truncated: 7,720 more rows]

[truncated: 2 more sheets: Up regulated transcripts (1047), Down regulated transcripts(866)]
